# Supplementary material for: Structure–function analysis of Lactiplantibacillus plantarum DltE reveals D-alanylated lipoteichoic acids as direct cues supporting Drosophila juvenile growth
Source: eLife. 2023 Apr 12;12:e84669. doi: 10.7554/eLife.84669 (PMC10241514; doi:10.7554/eLife.84669)
Supplement: Figure 1—source data 1. [file elife-84669-fig1-data1.xlsx]

## Sheet: Figure 1 
The figures with the 3D structures of DltE were done using the data deposited at the Protein Data Bank under the accession codes 8AGR(DltEextra-apo), 8AIK(DltEextra-tartrate), 8AJI(DltEextra-TCEP) and 8AKH (DltEextra-LTA)
