# Supplementary material for: Structure–function analysis of Lactiplantibacillus plantarum DltE reveals D-alanylated lipoteichoic acids as direct cues supporting Drosophila juvenile growth
Source: eLife. 2023 Apr 12;12:e84669. doi: 10.7554/eLife.84669 (PMC10241514; doi:10.7554/eLife.84669)
Supplement: Figure 1—source data 4. [file elife-84669-fig1-data4.xlsx]

## Sheet: Figure 1 - Figure supplement 2c
Figure 1 - Figure supplement 2c
Chrom,1
UV 1_280
ml	mAU
40.0013	0.21225
40.0046	0.212158
40.0079	0.211975
40.0113	0.211762
40.0146	0.211548
40.0179	0.211182
40.0212	0.210755
40.0246	0.210266
40.0279	0.21048
40.0312	0.211701
40.0346	0.213226
40.0379	0.214752
40.0412	0.215973
40.0445	0.216766
40.0479	0.217468
40.0512	0.218109
40.0545	0.218384
40.0578	0.218353
40.0612	0.218292
40.0645	0.218109
40.0678	0.217774
40.0712	0.217407
40.0745	0.217041
40.0778	0.216309
40.0811	0.215454
40.0845	0.2146
40.0878	0.213745
40.0911	0.212769
40.0945	0.211487
40.0978	0.210175
40.1011	0.208923
40.1044	0.208374
40.1078	0.208191
40.1111	0.208008
40.1144	0.20752
40.1177	0.207214
40.1211	0.207001
40.1244	0.206848
40.1277	0.206818
40.1311	0.206543
40.1344	0.206177
40.1377	0.205994
40.141	0.206513
40.1444	0.207306
40.1477	0.208069
40.151	0.20874
40.1544	0.208679
40.1577	0.208344
40.161	0.208008
40.1643	0.207642
40.1677	0.207337
40.171	0.207001
40.1743	0.206909
40.1776	0.207581
40.181	0.208557
40.1843	0.209564
40.1876	0.209992
40.191	0.210083
40.1943	0.210114
40.1976	0.210083
40.2009	0.209778
40.2043	0.209473
40.2076	0.209229
40.2109	0.209198
40.2142	0.209595
40.2176	0.210175
40.2209	0.210724
40.2242	0.210877
40.2276	0.21048
40.2309	0.2099
40.2342	0.209534
40.2375	0.210022
40.2409	0.210907
40.2442	0.211792
40.2475	0.212677
40.2509	0.213532
40.2542	0.214478
40.2575	0.215424
40.2608	0.215973
40.2642	0.216553
40.2675	0.217255
40.2708	0.217987
40.2741	0.218445
40.2775	0.218567
40.2808	0.218567
40.2841	0.218445
40.2875	0.218994
40.2908	0.220062
40.2941	0.221192
40.2974	0.222077
40.3008	0.221924
40.3041	0.221344
40.3074	0.220825
40.3108	0.220795
40.3141	0.221192
40.3174	0.221741
40.3207	0.222199
40.3241	0.222809
40.3274	0.223511
40.3307	0.224243
40.334	0.224823
40.3374	0.224945
40.3407	0.224884
40.344	0.224762
40.3474	0.224213
40.3507	0.223358
40.354	0.222443
40.3573	0.221741
40.3607	0.221832
40.364	0.222351
40.3673	0.222931
40.3707	0.222717
40.374	0.221436
40.3773	0.219849
40.3806	0.218414
40.384	0.217896
40.3873	0.217835
40.3906	0.217774
40.3939	0.217529
40.3973	0.217163
40.4006	0.216766
40.4039	0.2164
40.4073	0.215851
40.4106	0.214722
40.4139	0.213349
40.4172	0.212036
40.4206	0.211365
40.4239	0.211487
40.4272	0.211823
40.4305	0.21225
40.4339	0.21225
40.4372	0.211792
40.4405	0.211121
40.4439	0.210114
40.4472	0.20932
40.4505	0.208801
40.4538	0.208344
40.4572	0.208222
40.4605	0.208069
40.4638	0.207733
40.4672	0.207398
40.4705	0.207184
40.4738	0.207092
40.4771	0.207031
40.4805	0.206848
40.4838	0.20636
40.4871	0.20578
40.4904	0.20517
40.4938	0.205017
40.4971	0.205261
40.5004	0.205536
40.5038	0.205597
40.5071	0.205017
40.5104	0.20401
40.5137	0.202973
40.5171	0.202545
40.5204	0.202942
40.5237	0.203705
40.5271	0.204468
40.5304	0.204743
40.5337	0.20459
40.537	0.204468
40.5404	0.204437
40.5437	0.204987
40.547	0.205963
40.5503	0.207001
40.5537	0.207886
40.557	0.208191
40.5603	0.208161
40.5637	0.208099
40.567	0.208222
40.5703	0.208588
40.5736	0.209015
40.577	0.209351
40.5803	0.209656
40.5836	0.209992
40.5869	0.210297
40.5903	0.210755
40.5936	0.211517
40.5969	0.212525
40.6003	0.213501
40.6036	0.214142
40.6069	0.214325
40.6102	0.214417
40.6136	0.214478
40.6169	0.214356
40.6202	0.213989
40.6236	0.213562
40.6269	0.212952
40.6302	0.212036
40.6335	0.210999
40.6369	0.210022
40.6402	0.209625
40.6435	0.210053
40.6468	0.210663
40.6502	0.211243
40.6535	0.211334
40.6568	0.210968
40.6602	0.21048
40.6635	0.209931
40.6668	0.208954
40.6701	0.207672
40.6735	0.206329
40.6768	0.204865
40.6801	0.203247
40.6835	0.201599
40.6868	0.200073
40.6901	0.198364
40.6934	0.196259
40.6968	0.193939
40.7001	0.191803
40.7034	0.190827
40.7067	0.190765
40.7101	0.190704
40.7134	0.190674
40.7167	0.190735
40.7201	0.190827
40.7234	0.190735
40.7267	0.19043
40.73	0.190125
40.7334	0.18988
40.7367	0.189972
40.74	0.190338
40.7434	0.190704
40.7467	0.191101
40.75	0.191834
40.7533	0.193085
40.7567	0.194458
40.76	0.195862
40.7633	0.19693
40.7666	0.197601
40.77	0.198151
40.7733	0.199066
40.7766	0.20108
40.78	0.203858
40.7833	0.206604
40.7866	0.208405
40.7899	0.209107
40.7933	0.209686
40.7966	0.210205
40.7999	0.210663
40.8032	0.21106
40.8066	0.211426
40.8099	0.21164
40.8132	0.211426
40.8166	0.210938
40.8199	0.210449
40.8232	0.210144
40.8265	0.210297
40.8299	0.210693
40.8332	0.211029
40.8365	0.21109
40.8399	0.210877
40.8432	0.210632
40.8465	0.210571
40.8498	0.210968
40.8532	0.211517
40.8565	0.212036
40.8598	0.212128
40.8631	0.21164
40.8665	0.211212
40.8698	0.210846
40.8731	0.210388
40.8765	0.209412
40.8798	0.208161
40.8831	0.206909
40.8864	0.205567
40.8898	0.204041
40.8931	0.202545
40.8964	0.201172
40.8998	0.200012
40.9031	0.198853
40.9064	0.197662
40.9097	0.19635
40.9131	0.195252
40.9164	0.194428
40.9197	0.193665
40.923	0.193176
40.9264	0.192993
40.9297	0.19281
40.933	0.192536
40.9364	0.191925
40.9397	0.190979
40.943	0.190003
40.9463	0.189118
40.9497	0.188385
40.953	0.187744
40.9563	0.187378
40.9597	0.187744
40.963	0.188538
40.9663	0.189392
40.9696	0.190186
40.973	0.190765
40.9763	0.190918
40.9796	0.19104
40.9829	0.191406
40.9863	0.192352
40.9896	0.193573
40.9929	0.194611
40.9963	0.194702
40.9996	0.193634
41.0029	0.192505
41.0062	0.191284
41.0096	0.190125
41.0129	0.189209
41.0162	0.188324
41.0196	0.187897
41.0229	0.188233
41.0262	0.188721
41.0295	0.189087
41.0329	0.189148
41.0362	0.188904
41.0395	0.188629
41.0428	0.188263
41.0462	0.187592
41.0495	0.186707
41.0528	0.185974
41.0562	0.185791
41.0595	0.186524
41.0628	0.187439
41.0661	0.188171
41.0695	0.188202
41.0728	0.187653
41.0761	0.187103
41.0794	0.186951
41.0828	0.187775
41.0861	0.188721
41.0894	0.189606
41.0928	0.190216
41.0961	0.190338
41.0994	0.190369
41.1027	0.190277
41.1061	0.18985
41.1094	0.189209
41.1127	0.188629
41.1161	0.18808
41.1194	0.187714
41.1227	0.187348
41.126	0.187042
41.1294	0.187164
41.1327	0.188355
41.136	0.190003
41.1393	0.191528
41.1427	0.192291
41.146	0.191803
41.1493	0.191315
41.1527	0.190949
41.156	0.191132
41.1593	0.191681
41.1626	0.1922
41.166	0.192658
41.1693	0.192993
41.1726	0.193237
41.176	0.193543
41.1793	0.193817
41.1826	0.193512
41.1859	0.193207
41.1893	0.192932
41.1926	0.192932
41.1959	0.193268
41.1992	0.193665
41.2026	0.194122
41.2059	0.194824
41.2092	0.195679
41.2126	0.196289
41.2159	0.195831
41.2192	0.194367
41.2225	0.19278
41.2259	0.191559
41.2292	0.191376
41.2325	0.191223
41.2359	0.19104
41.2392	0.190704
41.2425	0.190399
41.2458	0.190369
41.2492	0.190369
41.2525	0.190247
41.2558	0.189392
41.2591	0.188355
41.2625	0.187531
41.2658	0.187836
41.2691	0.189179
41.2725	0.19046
41.2758	0.191467
41.2791	0.191834
41.2824	0.192047
41.2858	0.192169
41.2891	0.192047
41.2924	0.191712
41.2957	0.191406
41.2991	0.191193
41.3024	0.191528
41.3057	0.191773
41.3091	0.192047
41.3124	0.192261
41.3157	0.192108
41.319	0.191681
41.3224	0.191223
41.3257	0.190369
41.329	0.189514
41.3324	0.188629
41.3357	0.187988
41.339	0.188355
41.3423	0.189301
41.3457	0.190247
41.349	0.190643
41.3523	0.18988
41.3556	0.188904
41.359	0.188019
41.3623	0.187286
41.3656	0.186585
41.369	0.185852
41.3723	0.18515
41.3756	0.18454
41.3789	0.184113
41.3823	0.183685
41.3856	0.183289
41.3889	0.182984
41.3922	0.182617
41.3956	0.182312
41.3989	0.182251
41.4022	0.182282
41.4056	0.182251
41.4089	0.18219
41.4122	0.182099
41.4155	0.182373
41.4189	0.182648
41.4222	0.182709
41.4255	0.181976
41.4289	0.180939
41.4322	0.179932
41.4355	0.179016
41.4388	0.177857
41.4422	0.176666
41.4455	0.175537
41.4488	0.174652
41.4521	0.174133
41.4555	0.173584
41.4588	0.173035
41.4621	0.172577
41.4655	0.172394
41.4688	0.17218
41.4721	0.172028
41.4754	0.171875
41.4788	0.171692
41.4821	0.17157
41.4854	0.171814
41.4888	0.172546
41.4921	0.173279
41.4954	0.173767
41.4987	0.173065
41.5021	0.171661
41.5054	0.170288
41.5087	0.169403
41.512	0.169129
41.5154	0.168945
41.5187	0.168884
41.522	0.169525
41.5254	0.171845
41.5287	0.174164
41.532	0.176361
41.5353	0.17746
41.5387	0.177673
41.542	0.177826
41.5453	0.177734
41.5487	0.177796
41.552	0.177979
41.5553	0.178162
41.5586	0.178192
41.562	0.176972
41.5653	0.175751
41.5686	0.174439
41.5719	0.173126
41.5753	0.172546
41.5786	0.172119
41.5819	0.172424
41.5853	0.173309
41.5886	0.174194
41.5919	0.175049
41.5952	0.175629
41.5986	0.175903
41.6019	0.176148
41.6052	0.176209
41.6086	0.17453
41.6119	0.172852
41.6152	0.171234
41.6185	0.170288
41.6219	0.170014
41.6252	0.169556
41.6285	0.169067
41.6318	0.168335
41.6352	0.168671
41.6385	0.168945
41.6418	0.169403
41.6452	0.170715
41.6485	0.171234
41.6518	0.171692
41.6551	0.171753
41.6585	0.171723
41.6618	0.172089
41.6651	0.172424
41.6684	0.17276
41.6718	0.172302
41.6751	0.171784
41.6784	0.171295
41.6818	0.171082
41.6851	0.17099
41.6884	0.170899
41.6917	0.170807
41.6951	0.170868
41.6984	0.171021
41.7017	0.171173
41.7051	0.171661
41.7084	0.172608
41.7117	0.173523
41.715	0.174408
41.7184	0.173706
41.7217	0.172241
41.725	0.170746
41.7283	0.169769
41.7317	0.169769
41.735	0.16983
41.7383	0.169891
41.7417	0.16922
41.745	0.168518
41.7483	0.167847
41.7516	0.167206
41.755	0.167542
41.7583	0.168518
41.7616	0.169434
41.765	0.170288
41.7683	0.170563
41.7716	0.170502
41.7749	0.17041
41.7783	0.170166
41.7816	0.169586
41.7849	0.168945
41.7882	0.168335
41.7916	0.16742
41.7949	0.166351
41.7982	0.165314
41.8016	0.164642
41.8049	0.16507
41.8082	0.165802
41.8115	0.166504
41.8149	0.167145
41.8182	0.167786
41.8215	0.168488
41.8249	0.169129
41.8282	0.169617
41.8315	0.170288
41.8348	0.171051
41.8382	0.171631
41.8415	0.171326
41.8448	0.170838
41.8481	0.170258
41.8515	0.170075
41.8548	0.171326
41.8581	0.172638
41.8615	0.17395
41.8648	0.175049
41.8681	0.17511
41.8714	0.17511
41.8748	0.17511
41.8781	0.175049
41.8814	0.174866
41.8847	0.174683
41.8881	0.174103
41.8914	0.173828
41.8947	0.173554
41.8981	0.173309
41.9014	0.172943
41.9047	0.172608
41.908	0.172272
41.9114	0.171784
41.9147	0.170654
41.918	0.16919
41.9214	0.167725
41.9247	0.166596
41.928	0.166351
41.9313	0.166321
41.9347	0.16626
41.938	0.165131
41.9413	0.163361
41.9446	0.161469
41.948	0.160095
41.9513	0.160095
41.9546	0.160523
41.958	0.16098
41.9613	0.161591
41.9646	0.162506
41.9679	0.163513
41.9713	0.164551
41.9746	0.164917
41.9779	0.164642
41.9813	0.164307
41.9846	0.163971
41.9879	0.163452
41.9912	0.16275
41.9946	0.162048
41.9979	0.161682
42.0012	0.162323
42.0045	0.163208
42.0079	0.164063
42.0112	0.164215
42.0145	0.16388
42.0179	0.163544
42.0212	0.1633
42.0245	0.163941
42.0278	0.165009
42.0312	0.166138
42.0345	0.166992
42.0378	0.166809
42.0412	0.166321
42.0445	0.165833
42.0478	0.1651
42.0511	0.164185
42.0545	0.163208
42.0578	0.162415
42.0611	0.162476
42.0644	0.163025
42.0678	0.163635
42.0711	0.164398
42.0744	0.164551
42.0778	0.16449
42.0811	0.164398
42.0844	0.16388
42.0877	0.164093
42.0911	0.164459
42.0944	0.164887
42.0977	0.165192
42.1011	0.165009
42.1044	0.164673
42.1077	0.163941
42.111	0.162781
42.1144	0.16153
42.1177	0.160278
42.121	0.15976
42.1243	0.159638
42.1277	0.159607
42.131	0.159607
42.1343	0.160004
42.1377	0.160797
42.141	0.161621
42.1443	0.162109
42.1476	0.161835
42.151	0.161438
42.1543	0.161011
42.1576	0.161255
42.1609	0.16153
42.1643	0.161774
42.1676	0.161835
42.1709	0.160858
42.1743	0.159607
42.1776	0.158295
42.1809	0.15744
42.1842	0.157349
42.1876	0.157501
42.1909	0.157654
42.1942	0.157776
42.1976	0.157471
42.2009	0.157074
42.2042	0.156616
42.2075	0.156128
42.2109	0.155823
42.2142	0.155518
42.2175	0.154938
42.2208	0.154266
42.2242	0.153626
42.2275	0.153046
42.2308	0.152741
42.2342	0.152527
42.2375	0.152313
42.2408	0.152191
42.2441	0.151978
42.2475	0.151398
42.2508	0.150787
42.2541	0.150238
42.2575	0.150147
42.2608	0.150238
42.2641	0.15036
42.2674	0.150208
42.2708	0.149872
42.2741	0.149536
42.2774	0.149323
42.2807	0.149719
42.2841	0.150452
42.2874	0.151215
42.2907	0.151886
42.2941	0.1521
42.2974	0.152191
42.3007	0.152252
42.304	0.1521
42.3074	0.151795
42.3107	0.151459
42.314	0.151123
42.3174	0.150849
42.3207	0.150635
42.324	0.150421
42.3273	0.150482
42.3307	0.151398
42.334	0.152619
42.3373	0.15387
42.3406	0.154694
42.344	0.155029
42.3473	0.155243
42.3506	0.155487
42.354	0.155762
42.3573	0.156036
42.3606	0.156281
42.3639	0.156403
42.3673	0.156769
42.3706	0.157349
42.3739	0.157959
42.3773	0.158569
42.3806	0.158661
42.3839	0.158539
42.3872	0.158417
42.3906	0.158295
42.3939	0.158142
42.3972	0.15802
42.4005	0.157807
42.4039	0.15799
42.4072	0.158386
42.4105	0.158783
42.4139	0.15863
42.4172	0.157715
42.4205	0.156616
42.4238	0.155609
42.4272	0.154907
42.4305	0.154266
42.4338	0.153656
42.4371	0.153046
42.4405	0.152374
42.4438	0.151611
42.4471	0.150849
42.4505	0.149811
42.4538	0.149262
42.4571	0.149017
42.4604	0.148956
42.4638	0.14917
42.4671	0.149201
42.4704	0.149017
42.4738	0.148895
42.4771	0.148895
42.4804	0.148926
42.4837	0.148987
42.4871	0.148621
42.4904	0.147675
42.4937	0.146607
42.497	0.145661
42.5004	0.145294
42.5037	0.145233
42.507	0.145203
42.5104	0.145203
42.5137	0.145111
42.517	0.144989
42.5203	0.144837
42.5237	0.144867
42.527	0.145294
42.5303	0.145783
42.5336	0.146149
42.537	0.145599
42.5403	0.14447
42.5436	0.14328
42.547	0.142456
42.5503	0.141846
42.5536	0.141235
42.5569	0.140656
42.5603	0.139893
42.5636	0.138977
42.5669	0.138001
42.5703	0.137055
42.5736	0.136932
42.5769	0.137756
42.5802	0.138825
42.5836	0.139771
42.5869	0.140625
42.5902	0.14151
42.5935	0.142395
42.5969	0.14325
42.6002	0.143799
42.6035	0.144196
42.6069	0.144501
42.6102	0.144776
42.6135	0.145264
42.6168	0.145905
42.6202	0.146698
42.6235	0.146942
42.6268	0.146729
42.6302	0.146484
42.6335	0.146454
42.6368	0.146576
42.6401	0.146668
42.6435	0.14682
42.6468	0.147095
42.6501	0.147431
42.6534	0.147827
42.6568	0.147614
42.6601	0.147278
42.6634	0.147247
42.6668	0.147278
42.6701	0.147003
42.6734	0.145569
42.6767	0.143311
42.6801	0.141174
42.6834	0.139801
42.6867	0.139191
42.6901	0.138825
42.6934	0.138214
42.6967	0.137817
42.7	0.137817
42.7034	0.137848
42.7067	0.138519
42.71	0.139435
42.7133	0.140167
42.7167	0.1409
42.72	0.141358
42.7233	0.141358
42.7267	0.141174
42.73	0.140961
42.7333	0.141327
42.7366	0.142273
42.74	0.143311
42.7433	0.143799
42.7466	0.143677
42.7499	0.143463
42.7533	0.143494
42.7566	0.144531
42.7599	0.145935
42.7633	0.147095
42.7666	0.147888
42.7699	0.147858
42.7732	0.147186
42.7766	0.146423
42.7799	0.145081
42.7832	0.143829
42.7866	0.143097
42.7899	0.142395
42.7932	0.141907
42.7965	0.141358
42.7999	0.140595
42.8032	0.140106
42.8065	0.140289
42.8098	0.1409
42.8132	0.141571
42.8165	0.141693
42.8198	0.141113
42.8232	0.140381
42.8265	0.139618
42.8298	0.138916
42.8331	0.138367
42.8365	0.137879
42.8398	0.137573
42.8431	0.137787
42.8465	0.138458
42.8498	0.139191
42.8531	0.140167
42.8564	0.140778
42.8598	0.140717
42.8631	0.140656
42.8664	0.140137
42.8697	0.139526
42.8731	0.139252
42.8764	0.139069
42.8797	0.139008
42.8831	0.138855
42.8864	0.138611
42.8897	0.138245
42.893	0.138031
42.8964	0.138214
42.8997	0.138397
42.903	0.138672
42.9064	0.139008
42.9097	0.139343
42.913	0.139588
42.9163	0.139465
42.9197	0.138825
42.923	0.13797
42.9263	0.136994
42.9296	0.1362
42.933	0.135773
42.9363	0.135437
42.9396	0.135742
42.943	0.136871
42.9463	0.13797
42.9496	0.138916
42.9529	0.139435
42.9563	0.139588
42.9596	0.139771
42.9629	0.140106
42.9663	0.14035
42.9696	0.140015
42.9729	0.139526
42.9762	0.138733
42.9796	0.137634
42.9829	0.136749
42.9862	0.135895
42.9895	0.135254
42.9929	0.135224
42.9962	0.135529
42.9995	0.136078
43.0029	0.13681
43.0062	0.137268
43.0095	0.137634
43.0128	0.137695
43.0162	0.137573
43.0195	0.137695
43.0228	0.137817
43.0262	0.137787
43.0295	0.137421
43.0328	0.13681
43.0361	0.1362
43.0395	0.13559
43.0428	0.134949
43.0461	0.134308
43.0494	0.134064
43.0528	0.134766
43.0561	0.135895
43.0594	0.136963
43.0628	0.137817
43.0661	0.138275
43.0694	0.138641
43.0727	0.138794
43.0761	0.138336
43.0794	0.137329
43.0827	0.136322
43.086	0.135529
43.0894	0.135224
43.0927	0.134918
43.096	0.134613
43.0994	0.134308
43.1027	0.134522
43.106	0.135407
43.1093	0.136414
43.1127	0.137451
43.116	0.137726
43.1193	0.137451
43.1227	0.137146
43.126	0.137238
43.1293	0.138031
43.1326	0.138886
43.136	0.139526
43.1393	0.13974
43.1426	0.139801
43.1459	0.139893
43.1493	0.140076
43.1526	0.140198
43.1559	0.140228
43.1593	0.14032
43.1626	0.140473
43.1659	0.140503
43.1692	0.140503
43.1726	0.140625
43.1759	0.141296
43.1792	0.142548
43.1826	0.143555
43.1859	0.143494
43.1892	0.142182
43.1925	0.140595
43.1959	0.139404
43.1992	0.139252
43.2025	0.139801
43.2058	0.140381
43.2092	0.140656
43.2125	0.14032
43.2158	0.140137
43.2192	0.139954
43.2225	0.139771
43.2258	0.139252
43.2291	0.138397
43.2325	0.137604
43.2358	0.137238
43.2391	0.137634
43.2425	0.138123
43.2458	0.138641
43.2491	0.139221
43.2524	0.139649
43.2558	0.140045
43.2591	0.139862
43.2624	0.138641
43.2657	0.136994
43.2691	0.135498
43.2724	0.134735
43.2757	0.134705
43.2791	0.134796
43.2824	0.134827
43.2857	0.134827
43.289	0.134979
43.2924	0.135132
43.2957	0.134979
43.299	0.134216
43.3023	0.133057
43.3057	0.13205
43.309	0.13147
43.3123	0.131134
43.3157	0.130768
43.319	0.130219
43.3223	0.129364
43.3256	0.129181
43.329	0.128998
43.3323	0.128784
43.3356	0.128265
43.339	0.12735
43.3423	0.126526
43.3456	0.12616
43.3489	0.126465
43.3523	0.126801
43.3556	0.126984
43.3589	0.126892
43.3622	0.126953
43.3656	0.126984
43.3689	0.127014
43.3722	0.127014
43.3756	0.127136
43.3789	0.12735
43.3822	0.127655
43.3855	0.127167
43.3889	0.126434
43.3922	0.125733
43.3955	0.125366
43.3988	0.12558
43.4022	0.125794
43.4055	0.125671
43.4088	0.125
43.4122	0.124603
43.4155	0.124268
43.4188	0.124573
43.4221	0.125733
43.4255	0.127106
43.4288	0.128418
43.4321	0.129456
43.4355	0.130036
43.4388	0.130524
43.4421	0.130859
43.4454	0.130676
43.4488	0.130066
43.4521	0.129425
43.4554	0.128662
43.4587	0.12796
43.4621	0.127411
43.4654	0.127136
43.4687	0.128052
43.4721	0.12912
43.4754	0.130158
43.4787	0.131012
43.482	0.131531
43.4854	0.132477
43.4887	0.133392
43.492	0.134003
43.4954	0.133789
43.4987	0.133301
43.502	0.132721
43.5053	0.131867
43.5087	0.131714
43.512	0.131561
43.5153	0.1315
43.5186	0.131867
43.522	0.132233
43.5253	0.13263
43.5286	0.133209
43.532	0.133759
43.5353	0.134125
43.5386	0.1344
43.5419	0.1344
43.5453	0.133728
43.5486	0.133057
43.5519	0.132446
43.5553	0.132019
43.5586	0.131836
43.5619	0.131561
43.5652	0.131073
43.5686	0.130249
43.5719	0.129395
43.5752	0.128662
43.5785	0.128449
43.5819	0.128845
43.5852	0.129212
43.5885	0.129395
43.5919	0.128357
43.5952	0.126801
43.5985	0.125275
43.6018	0.123779
43.6052	0.12262
43.6085	0.121582
43.6118	0.120636
43.6151	0.120117
43.6185	0.119568
43.6218	0.119049
43.6251	0.118591
43.6285	0.118866
43.6318	0.119446
43.6351	0.120056
43.6384	0.120484
43.6418	0.120392
43.6451	0.120117
43.6484	0.119812
43.6518	0.119446
43.6551	0.119232
43.6584	0.11908
43.6617	0.118866
43.6651	0.118439
43.6684	0.118103
43.6717	0.117828
43.675	0.117798
43.6784	0.117859
43.6817	0.117676
43.685	0.117462
43.6884	0.116974
43.6917	0.116669
43.695	0.116486
43.6983	0.116303
43.7017	0.116516
43.705	0.117096
43.7083	0.117706
43.7117	0.118103
43.715	0.118134
43.7183	0.118134
43.7216	0.118164
43.725	0.118469
43.7283	0.118408
43.7316	0.118317
43.7349	0.118164
43.7383	0.117951
43.7416	0.117859
43.7449	0.117767
43.7483	0.117645
43.7516	0.117554
43.7549	0.117584
43.7582	0.117676
43.7616	0.118103
43.7649	0.119049
43.7682	0.119995
43.7716	0.120911
43.7749	0.12143
43.7782	0.121735
43.7815	0.12207
43.7849	0.122284
43.7882	0.122284
43.7915	0.122376
43.7948	0.122467
43.7982	0.12262
43.8015	0.122437
43.8048	0.122254
43.8082	0.122101
43.8115	0.122772
43.8148	0.123901
43.8181	0.125
43.8215	0.126038
43.8248	0.126557
43.8281	0.126862
43.8315	0.127197
43.8348	0.127319
43.8381	0.126648
43.8414	0.125977
43.8448	0.125305
43.8481	0.124603
43.8514	0.124268
43.8547	0.123993
43.8581	0.123688
43.8614	0.123596
43.8647	0.123474
43.8681	0.123383
43.8714	0.123108
43.8747	0.123016
43.878	0.122955
43.8814	0.122894
43.8847	0.122803
43.888	0.121948
43.8914	0.121124
43.8947	0.120087
43.898	0.118958
43.9013	0.118012
43.9047	0.117066
43.908	0.116516
43.9113	0.116669
43.9146	0.116882
43.918	0.117096
43.9213	0.118012
43.9246	0.118897
43.928	0.119751
43.9313	0.120422
43.9346	0.120819
43.9379	0.121369
43.9413	0.121857
43.9446	0.122345
43.9479	0.122223
43.9512	0.122009
43.9546	0.121796
43.9579	0.12143
43.9612	0.121552
43.9646	0.121674
43.9679	0.122162
43.9712	0.123383
43.9745	0.124573
43.9779	0.125733
43.9812	0.126618
43.9845	0.127289
43.9879	0.128021
43.9912	0.128723
43.9945	0.128632
43.9978	0.127747
44.0012	0.126831
44.0045	0.125916
44.0078	0.125427
44.0111	0.125214
44.0145	0.125031
44.0178	0.124756
44.0211	0.124451
44.0245	0.124176
44.0278	0.123871
44.0311	0.124268
44.0344	0.125549
44.0378	0.126862
44.0411	0.128082
44.0444	0.127777
44.0478	0.126526
44.0511	0.125214
44.0544	0.123932
44.0577	0.123261
44.0611	0.122772
44.0644	0.122284
44.0677	0.121765
44.071	0.120484
44.0744	0.119171
44.0777	0.118042
44.081	0.118012
44.0844	0.11853
44.0877	0.11911
44.091	0.119293
44.0943	0.119049
44.0977	0.118744
44.101	0.118408
44.1043	0.117981
44.1077	0.117706
44.111	0.117401
44.1143	0.116913
44.1176	0.115875
44.121	0.114929
44.1243	0.114044
44.1276	0.114075
44.1309	0.114807
44.1343	0.115448
44.1376	0.116119
44.1409	0.116272
44.1443	0.116516
44.1476	0.11676
44.1509	0.117096
44.1542	0.117859
44.1576	0.118378
44.1609	0.118866
44.1642	0.119019
44.1675	0.118622
44.1709	0.118073
44.1742	0.117554
44.1775	0.117188
44.1809	0.118012
44.1842	0.119019
44.1875	0.120026
44.1908	0.120392
44.1942	0.119904
44.1975	0.119293
44.2008	0.118561
44.2042	0.118073
44.2075	0.117798
44.2108	0.117523
44.2141	0.117523
44.2175	0.117096
44.2208	0.116608
44.2241	0.116119
44.2274	0.115265
44.2308	0.114197
44.2341	0.113129
44.2374	0.112274
44.2408	0.11261
44.2441	0.113526
44.2474	0.114472
44.2507	0.11554
44.2541	0.115509
44.2574	0.115296
44.2607	0.11499
44.264	0.113739
44.2674	0.11264
44.2707	0.111603
44.274	0.111023
44.2774	0.111786
44.2807	0.113068
44.284	0.114411
44.2873	0.115326
44.2907	0.115906
44.294	0.116425
44.2973	0.116913
44.3007	0.11792
44.304	0.118988
44.3073	0.120026
44.3106	0.121155
44.314	0.122376
44.3173	0.123627
44.3206	0.124848
44.324	0.125275
44.3273	0.124725
44.3306	0.123963
44.3339	0.1232
44.3373	0.123566
44.3406	0.124146
44.3439	0.124756
44.3472	0.125183
44.3506	0.125275
44.3539	0.125244
44.3572	0.125244
44.3606	0.124725
44.3639	0.123657
44.3672	0.122467
44.3705	0.121277
44.3739	0.120087
44.3772	0.118439
44.3805	0.116638
44.3839	0.114868
44.3872	0.113587
44.3905	0.112763
44.3938	0.111969
44.3972	0.111267
44.4005	0.110565
44.4038	0.109924
44.4071	0.109253
44.4105	0.108948
44.4138	0.108521
44.4171	0.108002
44.4205	0.107544
44.4238	0.107453
44.4271	0.107697
44.4304	0.108032
44.4338	0.108399
44.4371	0.108704
44.4404	0.109009
44.4437	0.109284
44.4471	0.10965
44.4504	0.10965
44.4537	0.109528
44.4571	0.109528
44.4604	0.110535
44.4637	0.112244
44.467	0.114105
44.4704	0.11554
44.4737	0.115936
44.477	0.115936
44.4804	0.115906
44.4837	0.115875
44.487	0.115997
44.4903	0.116181
44.4937	0.116455
44.497	0.116455
44.5003	0.115784
44.5036	0.11496
44.507	0.11377
44.5103	0.113281
44.5136	0.113434
44.517	0.113678
44.5203	0.113922
44.5236	0.113434
44.5269	0.112702
44.5303	0.11203
44.5336	0.111817
44.5369	0.111725
44.5402	0.111603
44.5436	0.111054
44.5469	0.10968
44.5502	0.107971
44.5536	0.106201
44.5569	0.104981
44.5602	0.103821
44.5635	0.102631
44.5669	0.10138
44.5702	0.100311
44.5735	0.099884
44.5769	0.099671
44.5802	0.099976
44.5835	0.100556
44.5868	0.101013
44.5902	0.10138
44.5935	0.1008
44.5968	0.099823
44.6001	0.098908
44.6035	0.097992
44.6068	0.098023
44.6101	0.098847
44.6135	0.099823
44.6168	0.100861
44.6201	0.100952
44.6234	0.100281
44.6268	0.099457
44.6301	0.098908
44.6334	0.098786
44.6368	0.098908
44.6401	0.09903
44.6434	0.099487
44.6467	0.100159
44.6501	0.100922
44.6534	0.101318
44.6567	0.101196
44.66	0.100891
44.6634	0.100586
44.6667	0.100769
44.67	0.101441
44.6734	0.102295
44.6767	0.103119
44.68	0.103485
44.6833	0.103516
44.6867	0.103516
44.69	0.103272
44.6933	0.102539
44.6967	0.101685
44.7	0.10083
44.7033	0.100739
44.7066	0.101196
44.71	0.101654
44.7133	0.102112
44.7166	0.102448
44.7199	0.102905
44.7233	0.103546
44.7266	0.104096
44.7299	0.104248
44.7333	0.104035
44.7366	0.103821
44.7399	0.103455
44.7432	0.103333
44.7466	0.103363
44.7499	0.103394
44.7532	0.103272
44.7565	0.103058
44.7599	0.102875
44.7632	0.102814
44.7665	0.103211
44.7699	0.104004
44.7732	0.104828
44.7765	0.105682
44.7798	0.105744
44.7832	0.105255
44.7865	0.104797
44.7898	0.104614
44.7932	0.104523
44.7965	0.104401
44.7998	0.104096
44.8031	0.103821
44.8065	0.103821
44.8098	0.103912
44.8131	0.104279
44.8164	0.104431
44.8198	0.104248
44.8231	0.104004
44.8264	0.103912
44.8298	0.104614
44.8331	0.105896
44.8364	0.107178
44.8397	0.10788
44.8431	0.107788
44.8464	0.107391
44.8497	0.10669
44.8531	0.105591
44.8564	0.104431
44.8597	0.103211
44.863	0.102783
44.8664	0.103272
44.8697	0.103912
44.873	0.104584
44.8763	0.105011
44.8797	0.10495
44.883	0.104645
44.8863	0.104004
44.8897	0.103851
44.893	0.104462
44.8963	0.105194
44.8996	0.106171
44.903	0.106629
44.9063	0.106445
44.9096	0.105866
44.913	0.104614
44.9163	0.103302
44.9196	0.102265
44.9229	0.101654
44.9263	0.101288
44.9296	0.100739
44.9329	0.100128
44.9362	0.09964
44.9396	0.099396
44.9429	0.099396
44.9462	0.099304
44.9496	0.098969
44.9529	0.09848
44.9562	0.097992
44.9595	0.097809
44.9629	0.098114
44.9662	0.098572
44.9695	0.09906
44.9729	0.098816
44.9762	0.098145
44.9795	0.097809
44.9828	0.097717
44.9862	0.098541
44.9895	0.100128
44.9928	0.101746
44.9961	0.102997
44.9995	0.103241
45.0028	0.102661
45.0061	0.10199
45.0095	0.101868
45.0128	0.102539
45.0161	0.103394
45.0194	0.104187
45.0228	0.104645
45.0261	0.104584
45.0294	0.10437
45.0327	0.104126
45.0361	0.104035
45.0394	0.104279
45.0427	0.104584
45.0461	0.10492
45.0494	0.105133
45.0527	0.105164
45.056	0.105072
45.0594	0.104431
45.0627	0.10318
45.066	0.101868
45.0694	0.100556
45.0727	0.099487
45.076	0.098847
45.0793	0.098297
45.0827	0.098114
45.086	0.098267
45.0893	0.098328
45.0926	0.098358
45.096	0.098267
45.0993	0.098084
45.1026	0.097901
45.106	0.097839
45.1093	0.098511
45.1126	0.099976
45.1159	0.101563
45.1193	0.102783
45.1226	0.102936
45.1259	0.102326
45.1293	0.101715
45.1326	0.101441
45.1359	0.101746
45.1392	0.102203
45.1426	0.102692
45.1459	0.103546
45.1492	0.104828
45.1525	0.106171
45.1559	0.107025
45.1592	0.10672
45.1625	0.105591
45.1659	0.104523
45.1692	0.103607
45.1725	0.102814
45.1758	0.101959
45.1792	0.101105
45.1825	0.100494
45.1858	0.100311
45.1892	0.100159
45.1925	0.099732
45.1958	0.098816
45.1991	0.098053
45.2025	0.097382
45.2058	0.097046
45.2091	0.096558
45.2124	0.095551
45.2158	0.094421
45.2191	0.093628
45.2224	0.093781
45.2258	0.094086
45.2291	0.094116
45.2324	0.093506
45.2357	0.092621
45.2391	0.091889
45.2424	0.091614
45.2457	0.091614
45.249	0.091339
45.2524	0.091156
45.2557	0.091217
45.259	0.091461
45.2624	0.091736
45.2657	0.091766
45.269	0.0914
45.2723	0.091126
45.2757	0.090851
45.279	0.090363
45.2823	0.089722
45.2857	0.089142
45.289	0.088837
45.2923	0.089478
45.2956	0.090576
45.299	0.091675
45.3023	0.092163
45.3056	0.091339
45.3089	0.090393
45.3123	0.089478
45.3156	0.088776
45.3189	0.088287
45.3223	0.087738
45.3256	0.087372
45.3289	0.087006
45.3322	0.085785
45.3356	0.084503
45.3389	0.083405
45.3422	0.083252
45.3456	0.084412
45.3489	0.085541
45.3522	0.086487
45.3555	0.087158
45.3589	0.087769
45.3622	0.088349
45.3655	0.088562
45.3688	0.088165
45.3722	0.087738
45.3755	0.087341
45.3788	0.086975
45.3822	0.086609
45.3855	0.086273
45.3888	0.086029
45.3921	0.085968
45.3955	0.085938
45.3988	0.085938
45.4021	0.085632
45.4054	0.084534
45.4088	0.083405
45.4121	0.082916
45.4154	0.084198
45.4188	0.086212
45.4221	0.087982
45.4254	0.088837
45.4287	0.088959
45.4321	0.089386
45.4354	0.089813
45.4387	0.090057
45.4421	0.089386
45.4454	0.088684
45.4487	0.088226
45.452	0.08844
45.4554	0.088715
45.4587	0.088928
45.462	0.089172
45.4653	0.089172
45.4687	0.089142
45.472	0.08905
45.4753	0.088959
45.4787	0.089325
45.482	0.089722
45.4853	0.090393
45.4886	0.091828
45.492	0.093079
45.4953	0.094238
45.4986	0.094696
45.502	0.094391
45.5053	0.094025
45.5086	0.093475
45.5119	0.092255
45.5153	0.09079
45.5186	0.089295
45.5219	0.088104
45.5252	0.08786
45.5286	0.087555
45.5319	0.087219
45.5352	0.086945
45.5386	0.086823
45.5419	0.086853
45.5452	0.086914
45.5485	0.087189
45.5519	0.087586
45.5552	0.087982
45.5585	0.088257
45.5619	0.088196
45.5652	0.088349
45.5685	0.088532
45.5718	0.088715
45.5752	0.088745
45.5785	0.088532
45.5818	0.088318
45.5851	0.088074
45.5885	0.087219
45.5918	0.086304
45.5951	0.085419
45.5985	0.084839
45.6018	0.084839
45.6051	0.084839
45.6084	0.084808
45.6118	0.084412
45.6151	0.083435
45.6184	0.082489
45.6217	0.081482
45.6251	0.081238
45.6284	0.081177
45.6317	0.081116
45.6351	0.081055
45.6384	0.081085
45.6417	0.081085
45.645	0.080994
45.6484	0.080811
45.6517	0.08075
45.655	0.08078
45.6584	0.081146
45.6617	0.081848
45.665	0.082489
45.6683	0.083313
45.6717	0.084564
45.675	0.085053
45.6783	0.085541
45.6816	0.085816
45.685	0.085938
45.6883	0.086487
45.6916	0.087158
45.695	0.088287
45.6983	0.089996
45.7016	0.091644
45.7049	0.09314
45.7083	0.093689
45.7116	0.09375
45.7149	0.093781
45.7183	0.093842
45.7216	0.094025
45.7249	0.094391
45.7282	0.094727
45.7316	0.09491
45.7349	0.094879
45.7382	0.094818
45.7415	0.094727
45.7449	0.094299
45.7482	0.092804
45.7515	0.091339
45.7549	0.090119
45.7582	0.089935
45.7615	0.089966
45.7648	0.089935
45.7682	0.089569
45.7715	0.089447
45.7748	0.089539
45.7782	0.0896
45.7815	0.089417
45.7848	0.088287
45.7881	0.087128
45.7915	0.08609
45.7948	0.085755
45.7981	0.085877
45.8014	0.085999
45.8048	0.085877
45.8081	0.085327
45.8114	0.084717
45.8148	0.084107
45.8181	0.083466
45.8214	0.082672
45.8247	0.081879
45.8281	0.081299
45.8314	0.081757
45.8347	0.082031
45.8381	0.082276
45.8414	0.082276
45.8447	0.081543
45.848	0.080658
45.8514	0.079651
45.8547	0.078095
45.858	0.076996
45.8613	0.075836
45.8647	0.075012
45.868	0.075653
45.8713	0.076904
45.8747	0.078095
45.878	0.078796
45.8813	0.078217
45.8846	0.077332
45.888	0.076477
45.8913	0.075836
45.8946	0.075165
45.8979	0.074524
45.9013	0.073914
45.9046	0.0737
45.9079	0.073761
45.9113	0.073822
45.9146	0.074097
45.9179	0.075379
45.9212	0.077026
45.9246	0.078674
45.9279	0.080841
45.9312	0.082459
45.9346	0.084168
45.9379	0.085724
45.9412	0.086426
45.9445	0.086884
45.9479	0.08728
45.9512	0.087189
45.9545	0.086151
45.9578	0.085053
45.9612	0.083954
45.9645	0.08371
45.9678	0.08371
45.9712	0.083679
45.9745	0.083679
45.9778	0.083679
45.9811	0.083557
45.9845	0.083435
45.9878	0.083069
45.9911	0.083191
45.9945	0.083557
45.9978	0.083862
46.0011	0.083313
46.0044	0.082214
46.0078	0.081055
46.0111	0.079956
46.0144	0.079437
46.0177	0.078705
46.0211	0.078034
46.0244	0.077484
46.0277	0.077088
46.0311	0.07663
46.0344	0.076172
46.0377	0.07605
46.041	0.076294
46.0444	0.076538
46.0477	0.076752
46.051	0.076782
46.0544	0.076538
46.0577	0.076294
46.061	0.076141
46.0643	0.076691
46.0677	0.077332
46.071	0.077973
46.0743	0.078064
46.0776	0.078552
46.081	0.079102
46.0843	0.07962
46.0876	0.080139
46.091	0.080536
46.0943	0.080902
46.0976	0.08136
46.1009	0.081238
46.1043	0.080994
46.1076	0.080719
46.1109	0.080475
46.1142	0.079834
46.1176	0.079224
46.1209	0.078522
46.1242	0.077789
46.1276	0.07724
46.1309	0.076691
46.1342	0.076386
46.1375	0.076203
46.1409	0.075958
46.1442	0.075775
46.1475	0.075012
46.1509	0.074036
46.1542	0.072998
46.1575	0.071838
46.1608	0.070526
46.1642	0.069763
46.1675	0.069092
46.1708	0.068543
46.1741	0.067871
46.1775	0.067078
46.1808	0.066284
46.1841	0.066254
46.1875	0.066651
46.1908	0.067047
46.1941	0.067597
46.1974	0.068482
46.2008	0.069367
46.2041	0.070221
46.2074	0.070923
46.2108	0.070618
46.2141	0.069946
46.2174	0.069244
46.2207	0.068848
46.2241	0.070007
46.2274	0.07132
46.2307	0.072662
46.234	0.073731
46.2374	0.07431
46.2407	0.074799
46.244	0.074799
46.2474	0.07367
46.2507	0.072357
46.254	0.071015
46.2573	0.070068
46.2607	0.069855
46.264	0.069733
46.2673	0.06958
46.2706	0.068939
46.274	0.067993
46.2773	0.067047
46.2806	0.066101
46.284	0.065643
46.2873	0.065338
46.2906	0.065003
46.2939	0.065552
46.2973	0.066559
46.3006	0.067627
46.3039	0.068543
46.3073	0.068115
46.3106	0.067597
46.3139	0.067078
46.3172	0.066986
46.3206	0.067078
46.3239	0.067108
46.3272	0.067169
46.3306	0.067658
46.3339	0.067749
46.3372	0.06778
46.3405	0.067688
46.3439	0.067505
46.3472	0.067841
46.3505	0.068237
46.3538	0.068909
46.3572	0.06958
46.3605	0.070282
46.3638	0.070953
46.3672	0.071289
46.3705	0.071503
46.3738	0.071716
46.3771	0.07193
46.3805	0.072205
46.3838	0.072724
46.3871	0.073303
46.3905	0.073792
46.3938	0.073181
46.3971	0.072235
46.4004	0.071228
46.4038	0.07077
46.4071	0.071289
46.4104	0.071991
46.4137	0.072754
46.4171	0.073853
46.4204	0.074768
46.4237	0.075653
46.4271	0.07608
46.4304	0.075104
46.4337	0.073731
46.437	0.072357
46.4404	0.07135
46.4437	0.071289
46.447	0.071442
46.4503	0.071564
46.4537	0.071655
46.457	0.071686
46.4603	0.071716
46.4637	0.071503
46.467	0.07135
46.4703	0.071259
46.4736	0.071167
46.477	0.072052
46.4803	0.073761
46.4836	0.075623
46.487	0.077301
46.4903	0.077637
46.4936	0.077118
46.4969	0.076477
46.5003	0.07605
46.5036	0.075562
46.5069	0.074829
46.5102	0.074005
46.5136	0.074005
46.5169	0.074738
46.5202	0.075653
46.5236	0.076416
46.5269	0.076355
46.5302	0.07605
46.5335	0.075806
46.5369	0.075531
46.5402	0.075287
46.5435	0.075012
46.5468	0.074738
46.5502	0.074188
46.5535	0.073181
46.5568	0.072052
46.5602	0.070831
46.5635	0.069122
46.5668	0.067139
46.5701	0.065155
46.5735	0.063599
46.5768	0.06311
46.5801	0.06311
46.5835	0.063141
46.5868	0.063538
46.5901	0.063965
46.5934	0.064392
46.5968	0.064758
46.6001	0.064453
46.6034	0.063599
46.6067	0.062622
46.6101	0.061676
46.6134	0.062012
46.6167	0.063263
46.6201	0.064697
46.6234	0.066071
46.6267	0.066528
46.63	0.066651
46.6334	0.066803
46.6367	0.067322
46.64	0.068115
[truncated: 16,187 more rows]
