# Supplementary material for: Structure–function analysis of Lactiplantibacillus plantarum DltE reveals D-alanylated lipoteichoic acids as direct cues supporting Drosophila juvenile growth
Source: eLife. 2023 Apr 12;12:e84669. doi: 10.7554/eLife.84669 (PMC10241514; doi:10.7554/eLife.84669)
Supplement: Figure 1—source data 5. — The experiment was made in triplicate. [file elife-84669-fig1-data5.xlsx]

## Sheet: RawData-1
Figure 1 - Figure Supplement 2e - replicate 1
NanoTemper Technologies	NanoTemper Technologies
MO.Affinity Analysis v2.3	MO.Affinity Analysis v2.3
Origin of exported data	Origin of exported data
Project Title:
Comment:
Project File Path:
Analysis-Set Name:	Analysis-Set #1
Exported from:	MST Traces
Exported on:	2023-03-15 10:17:26
Analysis Settings	Analysis Settings
Type of Analysis:	MST
Evaluation strategy:	On Time
Cold Region Start:	-1
Cold Region End:	0
Hot Region Start:	4
Hot Region End:	5
Sample Information	Sample Information		Sample Information	Sample Information		Sample Information	Sample Information		Sample Information	Sample Information		Sample Information	Sample Information		Sample Information	Sample Information		Sample Information	Sample Information		Sample Information	Sample Information		Sample Information	Sample Information		Sample Information	Sample Information		Sample Information	Sample Information		Sample Information	Sample Information		Sample Information	Sample Information		Sample Information	Sample Information		Sample Information	Sample Information		Sample Information	Sample Information
Merge-Set Name:	(#03)		Merge-Set Name:	(#03)		Merge-Set Name:	(#03)		Merge-Set Name:	(#03)		Merge-Set Name:	(#03)		Merge-Set Name:	(#03)		Merge-Set Name:	(#03)		Merge-Set Name:	(#03)		Merge-Set Name:	(#03)		Merge-Set Name:	(#03)		Merge-Set Name:	(#03)		Merge-Set Name:	(#03)		Merge-Set Name:	(#03)		Merge-Set Name:	(#03)		Merge-Set Name:	(#03)		Merge-Set Name:	(#03)
Run Name:	(#03)		Run Name:	(#03)		Run Name:	(#03)		Run Name:	(#03)		Run Name:	(#03)		Run Name:	(#03)		Run Name:	(#03)		Run Name:	(#03)		Run Name:	(#03)		Run Name:	(#03)		Run Name:	(#03)		Run Name:	(#03)		Run Name:	(#03)		Run Name:	(#03)		Run Name:	(#03)		Run Name:	(#03)
Date of Measurement:	2022-05-27 00:10:58		Date of Measurement:	2022-05-27 00:11:39		Date of Measurement:	2022-05-27 00:12:19		Date of Measurement:	2022-05-27 00:12:59		Date of Measurement:	2022-05-27 00:13:40		Date of Measurement:	2022-05-27 00:14:21		Date of Measurement:	2022-05-27 00:15:01		Date of Measurement:	2022-05-27 00:15:41		Date of Measurement:	2022-05-27 00:16:22		Date of Measurement:	2022-05-27 00:17:02		Date of Measurement:	2022-05-27 00:17:43		Date of Measurement:	2022-05-27 00:18:23		Date of Measurement:	2022-05-27 00:19:04		Date of Measurement:	2022-05-27 00:19:44		Date of Measurement:	2022-05-27 00:20:25		Date of Measurement:	2022-05-27 00:21:05
Capillary Type:	Monolith NT.115 Premium Capillary		Capillary Type:	Monolith NT.115 Premium Capillary		Capillary Type:	Monolith NT.115 Premium Capillary		Capillary Type:	Monolith NT.115 Premium Capillary		Capillary Type:	Monolith NT.115 Premium Capillary		Capillary Type:	Monolith NT.115 Premium Capillary		Capillary Type:	Monolith NT.115 Premium Capillary		Capillary Type:	Monolith NT.115 Premium Capillary		Capillary Type:	Monolith NT.115 Premium Capillary		Capillary Type:	Monolith NT.115 Premium Capillary		Capillary Type:	Monolith NT.115 Premium Capillary		Capillary Type:	Monolith NT.115 Premium Capillary		Capillary Type:	Monolith NT.115 Premium Capillary		Capillary Type:	Monolith NT.115 Premium Capillary		Capillary Type:	Monolith NT.115 Premium Capillary		Capillary Type:	Monolith NT.115 Premium Capillary
Capillary Position:	1		Capillary Position:	2		Capillary Position:	3		Capillary Position:	4		Capillary Position:	5		Capillary Position:	6		Capillary Position:	7		Capillary Position:	8		Capillary Position:	9		Capillary Position:	10		Capillary Position:	11		Capillary Position:	12		Capillary Position:	13		Capillary Position:	14		Capillary Position:	15		Capillary Position:	16
Ligand:	penicillin		Ligand:	penicillin		Ligand:	penicillin		Ligand:	penicillin		Ligand:	penicillin		Ligand:	penicillin		Ligand:	penicillin		Ligand:	penicillin		Ligand:	penicillin		Ligand:	penicillin		Ligand:	penicillin		Ligand:	penicillin		Ligand:	penicillin		Ligand:	penicillin		Ligand:	penicillin		Ligand:	penicillin
Ligand Concentration:	0.01		Ligand Concentration:	0.005		Ligand Concentration:	0.0025		Ligand Concentration:	0.00125		Ligand Concentration:	0.000625		Ligand Concentration:	0.0003125		Ligand Concentration:	0.00015625		Ligand Concentration:	7.8125e-05		Ligand Concentration:	3.90625e-05		Ligand Concentration:	1.95313e-05		Ligand Concentration:	9.76563e-06		Ligand Concentration:	4.88281e-06		Ligand Concentration:	2.44141e-06		Ligand Concentration:	1.2207e-06		Ligand Concentration:	6.10352e-07		Ligand Concentration:	3.05176e-07
Target:	Pbp2b		Target:	Pbp2b		Target:	Pbp2b		Target:	Pbp2b		Target:	Pbp2b		Target:	Pbp2b		Target:	Pbp2b		Target:	Pbp2b		Target:	Pbp2b		Target:	Pbp2b		Target:	Pbp2b		Target:	Pbp2b		Target:	Pbp2b		Target:	Pbp2b		Target:	Pbp2b		Target:	Pbp2b
TargetConcentration:	2e-08		TargetConcentration:	2e-08		TargetConcentration:	2e-08		TargetConcentration:	2e-08		TargetConcentration:	2e-08		TargetConcentration:	2e-08		TargetConcentration:	2e-08		TargetConcentration:	2e-08		TargetConcentration:	2e-08		TargetConcentration:	2e-08		TargetConcentration:	2e-08		TargetConcentration:	2e-08		TargetConcentration:	2e-08		TargetConcentration:	2e-08		TargetConcentration:	2e-08		TargetConcentration:	2e-08
Measurement Settings	Measurement Settings		Measurement Settings	Measurement Settings		Measurement Settings	Measurement Settings		Measurement Settings	Measurement Settings		Measurement Settings	Measurement Settings		Measurement Settings	Measurement Settings		Measurement Settings	Measurement Settings		Measurement Settings	Measurement Settings		Measurement Settings	Measurement Settings		Measurement Settings	Measurement Settings		Measurement Settings	Measurement Settings		Measurement Settings	Measurement Settings		Measurement Settings	Measurement Settings		Measurement Settings	Measurement Settings		Measurement Settings	Measurement Settings		Measurement Settings	Measurement Settings
MST-Power:	Medium		MST-Power:	Medium		MST-Power:	Medium		MST-Power:	Medium		MST-Power:	Medium		MST-Power:	Medium		MST-Power:	Medium		MST-Power:	Medium		MST-Power:	Medium		MST-Power:	Medium		MST-Power:	Medium		MST-Power:	Medium		MST-Power:	Medium		MST-Power:	Medium		MST-Power:	Medium		MST-Power:	Medium
Excitation-Power:	20		Excitation-Power:	20		Excitation-Power:	20		Excitation-Power:	20		Excitation-Power:	20		Excitation-Power:	20		Excitation-Power:	20		Excitation-Power:	20		Excitation-Power:	20		Excitation-Power:	20		Excitation-Power:	20		Excitation-Power:	20		Excitation-Power:	20		Excitation-Power:	20		Excitation-Power:	20		Excitation-Power:	20
Excitation type:	Nano - RED		Excitation type:	Nano - RED		Excitation type:	Nano - RED		Excitation type:	Nano - RED		Excitation type:	Nano - RED		Excitation type:	Nano - RED		Excitation type:	Nano - RED		Excitation type:	Nano - RED		Excitation type:	Nano - RED		Excitation type:	Nano - RED		Excitation type:	Nano - RED		Excitation type:	Nano - RED		Excitation type:	Nano - RED		Excitation type:	Nano - RED		Excitation type:	Nano - RED		Excitation type:	Nano - RED
Thermostat Setpoint:	22		Thermostat Setpoint:	22		Thermostat Setpoint:	22		Thermostat Setpoint:	22		Thermostat Setpoint:	22		Thermostat Setpoint:	22		Thermostat Setpoint:	22		Thermostat Setpoint:	22		Thermostat Setpoint:	22		Thermostat Setpoint:	22		Thermostat Setpoint:	22		Thermostat Setpoint:	22		Thermostat Setpoint:	22		Thermostat Setpoint:	22		Thermostat Setpoint:	22		Thermostat Setpoint:	22
Included	Included		Included	Included		Included	Included		Included	Included		Included	Included		Included	Included		Included	Included		Included	Included		Included	Included		Included	Included		Included	Included		Included	Included		Included	Included		Included	Included		Included	Included		Included	Included
Time [s]	Normalized Fluorescence [-]		Time [s]	Normalized Fluorescence [-]		Time [s]	Normalized Fluorescence [-]		Time [s]	Normalized Fluorescence [-]		Time [s]	Normalized Fluorescence [-]		Time [s]	Normalized Fluorescence [-]		Time [s]	Normalized Fluorescence [-]		Time [s]	Normalized Fluorescence [-]		Time [s]	Normalized Fluorescence [-]		Time [s]	Normalized Fluorescence [-]		Time [s]	Normalized Fluorescence [-]		Time [s]	Normalized Fluorescence [-]		Time [s]	Normalized Fluorescence [-]		Time [s]	Normalized Fluorescence [-]		Time [s]	Normalized Fluorescence [-]		Time [s]	Normalized Fluorescence [-]
-3.57675	1.00091		-3.57675	1.00022		-3.57675	1.00063		-3.57675	1.00073		-3.57675	1.00056		-3.57675	0.998967		-3.57675	1.00275		-3.57675	1.001		-3.57675	1.00149		-3.57675	1.00036		-3.57675	1.00056		-3.57675	1.00114		-3.57675	1.00039		-3.57675	0.999361		-3.57675	1.00079		-3.57675	1.00175
-3.50223	0.999419		-3.50223	0.99977		-3.50223	0.998781		-3.50223	0.999256		-3.50223	0.999531		-3.50223	0.999375		-3.50223	1.00115		-3.50223	1.00104		-3.50223	0.999118		-3.50223	1.00064		-3.50223	0.998591		-3.50223	1.0001		-3.50223	1.00029		-3.50223	1.00022		-3.50223	1.00041		-3.50223	1.00045
-3.42772	1.00024		-3.42772	1.00024		-3.42772	1.00027		-3.42772	1.00001		-3.42772	1.00088		-3.42772	1.0014		-3.42772	1.00046		-3.42772	1.00021		-3.42772	0.998719		-3.42772	0.99971		-3.42772	0.999755		-3.42772	0.997273		-3.42772	1.0007		-3.42772	0.999582		-3.42772	1.0004		-3.42772	0.999479
-3.3532	0.999048		-3.3532	0.999642		-3.3532	1.00032		-3.3532	1.00016		-3.3532	0.999484		-3.3532	0.999779		-3.3532	0.998058		-3.3532	1.00085		-3.3532	1.00062		-3.3532	1.00047		-3.3532	1.00012		-3.3532	0.999956		-3.3532	1.00123		-3.3532	0.999652		-3.3532	0.999324		-3.3532	0.999958
-3.27869	0.999614		-3.27869	1.00008		-3.27869	1.0003		-3.27869	1.0003		-3.27869	1.00006		-3.27869	0.999707		-3.27869	0.999995		-3.27869	0.999204		-3.27869	0.999854		-3.27869	0.999297		-3.27869	1.00021		-3.27869	1.00009		-3.27869	0.999159		-3.27869	1.00042		-3.27869	0.999424		-3.27869	0.999268
-3.20417	1.00089		-3.20417	0.99879		-3.20417	1.0004		-3.20417	0.999523		-3.20417	1.00227		-3.20417	0.999882		-3.20417	1.00114		-3.20417	1.00004		-3.20417	1.00135		-3.20417	0.999816		-3.20417	0.999095		-3.20417	1.00107		-3.20417	0.999725		-3.20417	0.999361		-3.20417	0.999173		-3.20417	1.00031
-3.12966	1.00012		-3.12966	0.999519		-3.12966	1.00003		-3.12966	1.00082		-3.12966	0.999554		-3.12966	1.00007		-3.12966	0.99879		-3.12966	0.99901		-3.12966	0.998891		-3.12966	1.00051		-3.12966	1.00016		-3.12966	1.00038		-3.12966	1.00042		-3.12966	0.999071		-3.12966	1.00017		-3.12966	0.999965
-3.05514	0.999602		-3.05514	1.00004		-3.05514	0.99977		-3.05514	0.998883		-3.05514	1.00018		-3.05514	1.00034		-3.05514	0.998989		-3.05514	0.999714		-3.05514	1.00041		-3.05514	1.00018		-3.05514	0.998905		-3.05514	0.999519		-3.05514	0.99913		-3.05514	1.00143		-3.05514	1.00036		-3.05514	0.99896
-2.98062	0.998298		-2.98062	0.999827		-2.98062	0.999602		-2.98062	0.999199		-2.98062	0.99923		-2.98062	0.998675		-2.98062	1.00034		-2.98062	1.00027		-2.98062	1.00082		-2.98062	0.999118		-2.98062	1.00076		-2.98062	1.00025		-2.98062	1.00025		-2.98062	0.999462		-2.98062	0.999665		-2.98062	1.00035
-2.90611	1.00026		-2.90611	0.99942		-2.90611	1.00007		-2.90611	0.999711		-2.90611	1.00093		-2.90611	0.999173		-2.90611	0.999968		-2.90611	0.99829		-2.90611	1.0004		-2.90611	0.999219		-2.90611	1.00039		-2.90611	1.00084		-2.90611	1.00082		-2.90611	0.999841		-2.90611	0.999329		-2.90611	0.99786
-2.83159	0.999425		-2.83159	0.999218		-2.83159	0.999452		-2.83159	0.999523		-2.83159	0.998483		-2.83159	0.999528		-2.83159	1.00187		-2.83159	0.999994		-2.83159	0.999775		-2.83159	1.00123		-2.83159	0.998838		-2.83159	0.999166		-2.83159	1.00221		-2.83159	0.999854		-2.83159	0.998525		-2.83159	1.00072
-2.75708	1.00044		-2.75708	1.00036		-2.75708	0.999552		-2.75708	0.9994		-2.75708	1.00054		-2.75708	1.00118		-2.75708	0.998693		-2.75708	1.00023		-2.75708	1.00014		-2.75708	0.999035		-2.75708	1.00004		-2.75708	0.99944		-2.75708	0.999572		-2.75708	1.00002		-2.75708	0.999709		-2.75708	0.999138
-2.68256	0.998452		-2.68256	0.999243		-2.68256	0.999027		-2.68256	0.998516		-2.68256	1.00058		-2.68256	0.999532		-2.68256	0.999263		-2.68256	1.00081		-2.68256	1.00012		-2.68256	1.00065		-2.68256	1.00019		-2.68256	1.00047		-2.68256	0.999391		-2.68256	0.999027		-2.68256	0.999592		-2.68256	0.999158
-2.60805	1.00078		-2.60805	0.999827		-2.60805	0.998167		-2.60805	1.00022		-2.60805	0.999818		-2.60805	1.00045		-2.60805	1.00006		-2.60805	0.998809		-2.60805	0.997776		-2.60805	0.998672		-2.60805	1.00029		-2.60805	0.999456		-2.60805	1.00113		-2.60805	0.998995		-2.60805	0.998787		-2.60805	1.00071
-2.53353	0.998847		-2.53353	1.00013		-2.53353	0.999641		-2.53353	0.999396		-2.53353	0.998316		-2.53353	0.999748		-2.53353	0.999688		-2.53353	1.00162		-2.53353	0.999794		-2.53353	1.001		-2.53353	1.00091		-2.53353	1.00031		-2.53353	1.00051		-2.53353	1.00145		-2.53353	0.999888		-2.53353	0.999124
-2.45901	0.999626		-2.45901	1.00063		-2.45901	0.998122		-2.45901	0.998923		-2.45901	0.998636		-2.45901	0.999056		-2.45901	0.999979		-2.45901	0.999299		-2.45901	0.999108		-2.45901	0.998544		-2.45901	0.999667		-2.45901	0.999629		-2.45901	0.998762		-2.45901	0.999885		-2.45901	1.00072		-2.45901	1.00046
-2.3845	0.997803		-2.3845	0.999259		-2.3845	0.998184		-2.3845	0.998949		-2.3845	1.00006		-2.3845	1.00025		-2.3845	0.999844		-2.3845	1.00003		-2.3845	0.999158		-2.3845	0.999782		-2.3845	0.999915		-2.3845	1.00008		-2.3845	0.999855		-2.3845	0.9989		-2.3845	1.00046		-2.3845	0.999247
-2.30998	1.00144		-2.30998	0.999691		-2.30998	0.999681		-2.30998	0.998419		-2.30998	0.99986		-2.30998	1.00121		-2.30998	0.999301		-2.30998	0.99971		-2.30998	1.00039		-2.30998	0.998661		-2.30998	0.999621		-2.30998	0.999967		-2.30998	0.99951		-2.30998	1.00095		-2.30998	0.998419		-2.30998	1.00046
-2.23547	1.00039		-2.23547	1.00064		-2.23547	0.998262		-2.23547	0.998905		-2.23547	0.999851		-2.23547	0.999039		-2.23547	0.998553		-2.23547	1.00046		-2.23547	0.998921		-2.23547	0.999799		-2.23547	1.0006		-2.23547	0.999218		-2.23547	1.00031		-2.23547	0.999519		-2.23547	1.00032		-2.23547	0.998728
-2.16095	1.00088		-2.16095	1.00023		-2.16095	0.998988		-2.16095	0.999243		-2.16095	0.998775		-2.16095	0.999635		-2.16095	0.998526		-2.16095	1.00139		-2.16095	0.998689		-2.16095	1.00201		-2.16095	0.997313		-2.16095	1.00109		-2.16095	0.999759		-2.16095	0.999488		-2.16095	1.00053		-2.16095	0.99976
-2.08644	1.00023		-2.08644	0.998872		-2.08644	0.998999		-2.08644	0.999742		-2.08644	1.00172		-2.08644	1.00079		-2.08644	0.998806		-2.08644	0.998212		-2.08644	1.00125		-2.08644	0.998957		-2.08644	0.999683		-2.08644	0.999213		-2.08644	0.998745		-2.08644	0.998641		-2.08644	1.00092		-2.08644	1.00078
-2.01192	1.00001		-2.01192	1.00033		-2.01192	0.999362		-2.01192	0.998888		-2.01192	1.00018		-2.01192	1.00071		-2.01192	0.999489		-2.01192	1.00045		-2.01192	0.998812		-2.01192	0.99865		-2.01192	1.00117		-2.01192	0.998586		-2.01192	0.999193		-2.01192	0.997025		-2.01192	0.999112		-2.01192	1.00011
-1.93741	1.00002		-1.93741	1.0014		-1.93741	0.999373		-1.93741	0.998397		-1.93741	0.999086		-1.93741	0.999487		-1.93741	0.997838		-1.93741	0.999294		-1.93741	0.999794		-1.93741	0.999487		-1.93741	0.998524		-1.93741	0.99887		-1.93741	0.997805		-1.93741	0.998515		-1.93741	1.00113		-1.93741	0.99896
-1.86289	0.999573		-1.86289	0.998963		-1.86289	1.00065		-1.86289	0.997819		-1.86289	0.999234		-1.86289	1.0014		-1.86289	0.999317		-1.86289	1.00132		-1.86289	0.998931		-1.86289	0.998426		-1.86289	0.999472		-1.86289	0.999561		-1.86289	0.998094		-1.86289	0.999437		-1.86289	1.00055		-1.86289	1.00077
-1.78837	1.00012		-1.78837	1.00066		-1.78837	1.00081		-1.78837	0.998708		-1.78837	1.00016		-1.78837	1.00006		-1.78837	0.999462		-1.78837	1.00143		-1.78837	1.00048		-1.78837	1.00025		-1.78837	0.999374		-1.78837	1.00033		-1.78837	1.00023		-1.78837	0.999803		-1.78837	1.00101		-1.78837	0.999397
-1.71386	0.999219		-1.71386	0.998053		-1.71386	0.999357		-1.71386	0.99975		-1.71386	1.00012		-1.71386	0.999478		-1.71386	0.99922		-1.71386	0.999303		-1.71386	1.00003		-1.71386	1.00062		-1.71386	1.00005		-1.71386	1.00088		-1.71386	0.998694		-1.71386	0.99813		-1.71386	0.999709		-1.71386	1.00105
-1.63934	0.998717		-1.63934	0.999354		-1.63934	0.99982		-1.63934	0.997548		-1.63934	0.999243		-1.63934	1.00113		-1.63934	1.00008		-1.63934	0.999875		-1.63934	1.00087		-1.63934	0.998705		-1.63934	1.00015		-1.63934	1.00093		-1.63934	0.999821		-1.63934	0.998042		-1.63934	0.999251		-1.63934	0.999281
-1.56483	0.99975		-1.56483	1		-1.56483	0.999089		-1.56483	0.999497		-1.56483	1.00043		-1.56483	0.999959		-1.56483	1.00149		-1.56483	0.998953		-1.56483	1.00004		-1.56483	1.00081		-1.56483	0.999142		-1.56483	0.999571		-1.56483	1.0008		-1.56483	0.999342		-1.56483	0.999894		-1.56483	0.998851
-1.49031	1.00013		-1.49031	0.999103		-1.49031	0.997709		-1.49031	0.999483		-1.49031	0.999688		-1.49031	0.998895		-1.49031	0.999758		-1.49031	0.999916		-1.49031	0.999548		-1.49031	1.0005		-1.49031	0.998869		-1.49031	0.999656		-1.49031	1.00016		-1.49031	0.998818		-1.49031	0.998726		-1.49031	1.00013
-1.4158	0.999154		-1.4158	0.999959		-1.4158	0.999474		-1.4158	0.999834		-1.4158	0.999378		-1.4158	1.00253		-1.4158	0.999726		-1.4158	1.00044		-1.4158	0.999015		-1.4158	1.00023		-1.4158	1.00023		-1.4158	1.00122		-1.4158	1.00031		-1.4158	0.998231		-1.4158	1.00045		-1.4158	1.00003
-1.34128	0.99893		-1.34128	1.00102		-1.34128	0.997424		-1.34128	0.999094		-1.34128	0.999151		-1.34128	1.00067		-1.34128	0.998532		-1.34128	1.00003		-1.34128	0.999439		-1.34128	0.999609		-1.34128	1.00127		-1.34128	1.00108		-1.34128	0.996905		-1.34128	0.997966		-1.34128	0.998665		-1.34128	0.999145
-1.26677	1.00019		-1.26677	0.998189		-1.26677	0.998273		-1.26677	0.998538		-1.26677	0.99891		-1.26677	0.999721		-1.26677	0.998849		-1.26677	0.9999		-1.26677	1.00061		-1.26677	1.00028		-1.26677	0.999276		-1.26677	0.999271		-1.26677	1.00045		-1.26677	0.997884		-1.26677	0.999838		-1.26677	1.00052
-1.19225	1.00074		-1.19225	0.998514		-1.19225	0.999636		-1.19225	0.999335		-1.19225	0.999614		-1.19225	0.999887		-1.19225	0.999355		-1.19225	1.0005		-1.19225	1.00083		-1.19225	0.999788		-1.19225	0.998761		-1.19225	1.00046		-1.19225	0.999374		-1.19225	0.998578		-1.19225	0.997363		-1.19225	0.998065
-1.11773	0.998924		-1.11773	0.998996		-1.11773	0.998592		-1.11773	0.999462		-1.11773	0.998664		-1.11773	0.999339		-1.11773	1.0003		-1.11773	1.00039		-1.11773	0.99936		-1.11773	0.998806		-1.11773	0.999734		-1.11773	1.00091		-1.11773	0.998632		-1.11773	1.0004		-1.11773	1.00029		-1.11773	0.999466
-1.04322	0.998983		-1.04322	0.998687		-1.04322	0.998737		-1.04322	0.999917		-1.04322	1.00036		-1.04322	0.999905		-1.04322	1.00161		-1.04322	1.00078		-1.04322	1.00057		-1.04322	0.998717		-1.04322	1.00042		-1.04322	0.999445		-1.04322	1.00029		-1.04322	0.999159		-1.04322	0.999581		-1.04322	1.00016
-0.968703	0.997171		-0.968703	0.999099		-0.968703	0.999775		-0.968703	0.998818		-0.968703	1.00025		-0.968703	0.9999		-0.968703	0.999807		-0.968703	0.998628		-0.968703	1.00074		-0.968703	1.0007		-0.968703	0.99841		-0.968703	0.999714		-0.968703	1.00098		-0.968703	0.997909		-0.968703	0.9991		-0.968703	0.999883
-0.894187	0.99913		-0.894187	0.999774		-0.894187	0.998519		-0.894187	0.998367		-0.894187	1.00028		-0.894187	0.999442		-0.894187	1.00117		-0.894187	1.00044		-0.894187	1.0009		-0.894187	1.00083		-0.894187	0.999461		-0.894187	0.999846		-0.894187	1.00016		-0.894187	0.999873		-0.894187	0.99838		-0.894187	0.999848
-0.819672	0.999921		-0.819672	1.00036		-0.819672	0.999033		-0.819672	0.998813		-0.819672	1.00009		-0.819672	0.999501		-0.819672	1.00021		-0.819672	0.999969		-0.819672	0.998931		-0.819672	0.999392		-0.819672	1.0007		-0.819672	0.999803		-0.819672	1.00106		-0.819672	0.999311		-0.819672	0.999363		-0.819672	1.00055
-0.745156	0.998168		-0.745156	1.00018		-0.745156	0.998737		-0.745156	0.997728		-0.745156	0.999934		-0.745156	0.999505		-0.745156	0.999796		-0.745156	1.00216		-0.745156	0.99898		-0.745156	1.0003		-0.745156	0.999837		-0.745156	0.999672		-0.745156	1.00088		-0.745156	0.999374		-0.745156	0.999424		-0.745156	0.998769
-0.67064	0.999071		-0.67064	0.997531		-0.67064	0.998575		-0.67064	0.998227		-0.67064	1.00018		-0.67064	0.999972		-0.67064	1.00125		-0.67064	1.00043		-0.67064	1.00013		-0.67064	0.999425		-0.67064	0.999945		-0.67064	0.99819		-0.67064	1.00107		-0.67064	0.997795		-0.67064	1.00036		-0.67064	0.997867
-0.596125	1.00038		-0.596125	0.998411		-0.596125	0.998552		-0.596125	0.998656		-0.596125	0.999498		-0.596125	0.999546		-0.596125	0.998666		-0.596125	1.00008		-0.596125	1.00112		-0.596125	0.999336		-0.596125	0.998869		-0.596125	0.99905		-0.596125	0.998281		-0.596125	0.99693		-0.596125	1.00026		-0.596125	0.99965
-0.521609	1.00098		-0.521609	0.999737		-0.521609	0.998647		-0.521609	0.998187		-0.521609	1.00023		-0.521609	1.00115		-0.521609	0.999263		-0.521609	0.998722		-0.521609	0.999789		-0.521609	0.99827		-0.521609	0.999513		-0.521609	1.00133		-0.521609	1.00018		-0.521609	0.999399		-0.521609	1.00123		-0.521609	1.00028
-0.447094	0.99877		-0.447094	0.997889		-0.447094	0.99929		-0.447094	0.997929		-0.447094	0.999851		-0.447094	0.998756		-0.447094	1.00041		-0.447094	1.00086		-0.447094	0.999799		-0.447094	0.999107		-0.447094	0.999781		-0.447094	1.00009		-0.447094	0.999051		-0.447094	0.998332		-0.447094	0.999123		-0.447094	1.00038
-0.372578	0.997319		-0.372578	0.999798		-0.372578	0.996648		-0.372578	0.997881		-0.372578	1.00037		-0.372578	1.00005		-0.372578	0.999925		-0.372578	1.00229		-0.372578	0.998946		-0.372578	0.998811		-0.372578	0.998611		-0.372578	1.00002		-0.372578	0.999198		-0.372578	0.997372		-0.372578	0.99967		-0.372578	0.999507
-0.298063	1.00006		-0.298063	1.00037		-0.298063	0.996464		-0.298063	0.998682		-0.298063	0.999424		-0.298063	1.00047		-0.298063	0.997945		-0.298063	0.999385		-0.298063	0.998433		-0.298063	0.999297		-0.298063	0.999621		-0.298063	0.999951		-0.298063	1.00179		-0.298063	0.998591		-0.298063	0.999637		-0.298063	1.0013
-0.223547	0.999508		-0.223547	0.999658		-0.223547	1.00021		-0.223547	0.997938		-0.223547	0.999466		-0.223547	0.999595		-0.223547	0.999554		-0.223547	0.999965		-0.223547	0.999997		-0.223547	0.999425		-0.223547	0.998209		-0.223547	0.998396		-0.223547	0.999889		-0.223547	0.998585		-0.223547	0.99924		-0.223547	0.999534
-0.149031	0.99936		-0.149031	1.00018		-0.149031	0.999323		-0.149031	0.997981		-0.149031	1.0023		-0.149031	1.0003		-0.149031	0.998634		-0.149031	1.00136		-0.149031	0.9994		-0.149031	0.999782		-0.149031	0.999374		-0.149031	1.0007		-0.149031	1.00023		-0.149031	0.998515		-0.149031	0.998961		-0.149031	0.99801
-0.0745156	0.999549		-0.0745156	0.998062		-0.0745156	0.99781		-0.0745156	0.997771		-0.0745156	1.00056		-0.0745156	0.998926		-0.0745156	0.999521		-0.0745156	1.00045		-0.0745156	1.00009		-0.0745156	0.999626		-0.0745156	0.999173		-0.0745156	1.00031		-0.0745156	1.00051		-0.0745156	0.997997		-0.0745156	0.999257		-0.0745156	0.999179
0	0.998629		0	0.998531		0	0.99671		0	0.996261		0	0.997232		0	0.999088		0	0.999968		0	0.998747		0	0.998097		0	1.00017		0	0.998431		0	0.998491		0	0.999702		0	0.998875		0	0.99857		0	0.99883
0.0745156	0.977854		0.0745156	0.977389		0.0745156	0.979442		0.0745156	0.976652		0.0745156	0.977646		0.0745156	0.97969		0.0745156	0.979595		0.0745156	0.979286		0.0745156	0.979598		0.0745156	0.979256		0.0745156	0.980071		0.0745156	0.978546		0.0745156	0.977809		0.0745156	0.981283		0.0745156	0.978215		0.0745156	0.979179
0.149031	0.967646		0.149031	0.9684		0.149031	0.96715		0.149031	0.966409		0.149031	0.967416		0.149031	0.968627		0.149031	0.968879		0.149031	0.969929		0.149031	0.967944		0.149031	0.967986		0.149031	0.970407		0.149031	0.968831		0.149031	0.970684		0.149031	0.967959		0.149031	0.969309		0.149031	0.969169
0.223547	0.958518		0.223547	0.960379		0.223547	0.960879		0.223547	0.959202		0.223547	0.961009		0.223547	0.961581		0.223547	0.963655		0.223547	0.962813		0.223547	0.962753		0.223547	0.961966		0.223547	0.960522		0.223547	0.963329		0.223547	0.963521		0.223547	0.962453		0.223547	0.960074		0.223547	0.961858
0.298062	0.954872		0.298062	0.954786		0.298062	0.955624		0.298062	0.955624		0.298062	0.95642		0.298062	0.956218		0.298062	0.958378		0.298062	0.956819		0.298062	0.9596		0.298062	0.958328		0.298062	0.956689		0.298062	0.958184		0.298062	0.957371		0.298062	0.955703		0.298062	0.9589		0.298062	0.95607
0.372578	0.951272		0.372578	0.9513		0.372578	0.949687		0.372578	0.951596		0.372578	0.952865		0.372578	0.95383		0.372578	0.952455		0.372578	0.953959		0.372578	0.954128		0.372578	0.950612		0.372578	0.9533		0.372578	0.95537		0.372578	0.952217		0.372578	0.954263		0.372578	0.954559		0.372578	0.952913
0.447093	0.947178		0.447093	0.946773		0.447093	0.945878		0.447093	0.947164		0.447093	0.948312		0.447093	0.947955		0.447093	0.949905		0.447093	0.949505		0.447093	0.950526		0.447093	0.950673		0.447093	0.948926		0.447093	0.951933		0.447093	0.950575		0.447093	0.950405		0.447093	0.95133		0.447093	0.948889
0.521609	0.943484		0.521609	0.943377		0.521609	0.944074		0.521609	0.94328		0.521609	0.944794		0.521609	0.946505		0.521609	0.945951		0.521609	0.947793		0.521609	0.946944		0.521609	0.947487		0.521609	0.946902		0.521609	0.946472		0.521609	0.948978		0.521609	0.947557		0.521609	0.947178		0.521609	0.948219
0.596125	0.940522		0.596125	0.940208		0.596125	0.940204		0.596125	0.940364		0.596125	0.942142		0.596125	0.942318		0.596125	0.944886		0.596125	0.944129		0.596125	0.945345		0.596125	0.942516		0.596125	0.945202		0.596125	0.946398		0.596125	0.94353		0.596125	0.944091		0.596125	0.944686		0.596125	0.942855
0.67064	0.936398		0.67064	0.939048		0.67064	0.936049		0.67064	0.937106		0.67064	0.93918		0.67064	0.941263		0.67064	0.941529		0.67064	0.94184		0.67064	0.943001		0.67064	0.942159		0.67064	0.942657		0.67064	0.943679		0.67064	0.941644		0.67064	0.941003		0.67064	0.941055		0.67064	0.940573
0.745156	0.933737		0.745156	0.933475		0.745156	0.935217		0.745156	0.935153		0.745156	0.937178		0.745156	0.938418		0.745156	0.939226		0.745156	0.937473		0.745156	0.938876		0.745156	0.939743		0.745156	0.938747		0.745156	0.940247		0.745156	0.939832		0.745156	0.940542		0.745156	0.941038		0.745156	0.93782
0.819672	0.932793		0.819672	0.932072		0.819672	0.931649		0.819672	0.931584		0.819672	0.933993		0.819672	0.935855		0.819672	0.936289		0.819672	0.936588		0.819672	0.93824		0.819672	0.938075		0.819672	0.937227		0.819672	0.939109		0.819672	0.939464		0.819672	0.939746		0.819672	0.939524		0.819672	0.937444
0.894187	0.928957		0.894187	0.930746		0.894187	0.930861		0.894187	0.93108		0.894187	0.933047		0.894187	0.934329		0.894187	0.933583		0.894187	0.934724		0.894187	0.935876		0.894187	0.935146		0.894187	0.936238		0.894187	0.937723		0.894187	0.937131		0.894187	0.937037		0.894187	0.933987		0.894187	0.935893
0.968703	0.926344		0.968703	0.927989		0.968703	0.927421		0.968703	0.92826		0.968703	0.930303		0.968703	0.93059		0.968703	0.931684		0.968703	0.93239		0.968703	0.932314		0.968703	0.933689		0.968703	0.933797		0.968703	0.934534		0.968703	0.933886		0.968703	0.933186		0.968703	0.932892		0.968703	0.93236
1.04322	0.923871		1.04322	0.926759		1.04322	0.92545		1.04322	0.926237		1.04322	0.927517		1.04322	0.929648		1.04322	0.92928		1.04322	0.931357		1.04322	0.932891		1.04322	0.930894		1.04322	0.931736		1.04322	0.934291		1.04322	0.933563		1.04322	0.932352		1.04322	0.932071		1.04322	0.929955
1.11773	0.924709		1.11773	0.924277		1.11773	0.923886		1.11773	0.923781		1.11773	0.926688		1.11773	0.92731		1.11773	0.928456		1.11773	0.929796		1.11773	0.92883		1.11773	0.929901		1.11773	0.930582		1.11773	0.930359		1.11773	0.930799		1.11773	0.929599		1.11773	0.931126		1.11773	0.928096
1.19225	0.919706		1.19225	0.920651		1.19225	0.922406		1.19225	0.920361		1.19225	0.922423		1.19225	0.925133		1.19225	0.927042		1.19225	0.927002		1.19225	0.927961		1.19225	0.928741		1.19225	0.928995		1.19225	0.928245		1.19225	0.928109		1.19225	0.929599		1.19225	0.926969		1.19225	0.92744
1.26677	0.919806		1.26677	0.921297		1.26677	0.921138		1.26677	0.917549		1.26677	0.921069		1.26677	0.92358		1.26677	0.925589		1.26677	0.92568		1.26677	0.926881		1.26677	0.925906		1.26677	0.925034		1.26677	0.925942		1.26677	0.928472		1.26677	0.926341		1.26677	0.92574		1.26677	0.926976
1.34128	0.917221		1.34128	0.918276		1.34128	0.918905		1.34128	0.916805		1.34128	0.9194		1.34128	0.922301		1.34128	0.924949		1.34128	0.923635		1.34128	0.925119		1.34128	0.924634		1.34128	0.922912		1.34128	0.924556		1.34128	0.924275		1.34128	0.924011		1.34128	0.925612		1.34128	0.923744
1.4158	0.915776		1.4158	0.916194		1.4158	0.916676		1.4158	0.915308		1.4158	0.919034		1.4158	0.917907		1.4158	0.921538		1.4158	0.922535		1.4158	0.924384		1.4158	0.923987		1.4158	0.923793		1.4158	0.924846		1.4158	0.923075		1.4158	0.925918		1.4158	0.922148		1.4158	0.921441
1.49031	0.914631		1.49031	0.914864		1.49031	0.914403		1.49031	0.916188		1.49031	0.9168		1.49031	0.917009		1.49031	0.918154		1.49031	0.92049		1.49031	0.920363		1.49031	0.921091		1.49031	0.921366		1.49031	0.923328		1.49031	0.922826		1.49031	0.921794		1.49031	0.921969		1.49031	0.921714
1.56483	0.913221		1.56483	0.91379		1.56483	0.913007		1.56483	0.913622		1.56483	0.91514		1.56483	0.91547		1.56483	0.919655		1.56483	0.92058		1.56483	0.919928		1.56483	0.920506		1.56483	0.919615		1.56483	0.922558		1.56483	0.920532		1.56483	0.921643		1.56483	0.921567		1.56483	0.919671
1.63934	0.911244		1.63934	0.911774		1.63934	0.911991		1.63934	0.911161		1.63934	0.913249		1.63934	0.916157		1.63934	0.918111		1.63934	0.917757		1.63934	0.919208		1.63934	0.92093		1.63934	0.91826		1.63934	0.920545		1.63934	0.919654		1.63934	0.920001		1.63934	0.919494		1.63934	0.917943
1.71386	0.910023		1.71386	0.911432		1.71386	0.909126		1.71386	0.910513		1.71386	0.912197		1.71386	0.913845		1.71386	0.917665		1.71386	0.914768		1.71386	0.917289		1.71386	0.918274		1.71386	0.916926		1.71386	0.918315		1.71386	0.918425		1.71386	0.917204		1.71386	0.916951		1.71386	0.914779
1.78837	0.908306		1.78837	0.908296		1.78837	0.908813		1.78837	0.908437		1.78837	0.910769		1.78837	0.912104		1.78837	0.915422		1.78837	0.913216		1.78837	0.916909		1.78837	0.9179		1.78837	0.916833		1.78837	0.915753		1.78837	0.916806		1.78837	0.917538		1.78837	0.917069		1.78837	0.914827
1.86289	0.906607		1.86289	0.906576		1.86289	0.907534		1.86289	0.906607		1.86289	0.908984		1.86289	0.91188		1.86289	0.913049		1.86289	0.914546		1.86289	0.913706		1.86289	0.916226		1.86289	0.914829		1.86289	0.916012		1.86289	0.915396		1.86289	0.917418		1.86289	0.914789		1.86289	0.915599
1.93741	0.905326		1.93741	0.904835		1.93741	0.907255		1.93741	0.906414		1.93741	0.90789		1.93741	0.909819		1.93741	0.912188		1.93741	0.912377		1.93741	0.913978		1.93741	0.914184		1.93741	0.913562		1.93741	0.913402		1.93741	0.916993		1.93741	0.915884		1.93741	0.913705		1.93741	0.912845
2.01192	0.905403		2.01192	0.903723		2.01192	0.904312		2.01192	0.90517		2.01192	0.904905		2.01192	0.90894		2.01192	0.911371		2.01192	0.910562		2.01192	0.912231		2.01192	0.913554		2.01192	0.91281		2.01192	0.914815		2.01192	0.914524		2.01192	0.914027		2.01192	0.911722		2.01192	0.910891
2.08644	0.902896		2.08644	0.903234		2.08644	0.90401		2.08644	0.904562		2.08644	0.905656		2.08644	0.908083		2.08644	0.910042		2.08644	0.909899		2.08644	0.913835		2.08644	0.911272		2.08644	0.910389		2.08644	0.912844		2.08644	0.913136		2.08644	0.912657		2.08644	0.910387		2.08644	0.911602
2.16095	0.903603		2.16095	0.899727		2.16095	0.901481		2.16095	0.902359		2.16095	0.904098		2.16095	0.906031		2.16095	0.908272		2.16095	0.907289		2.16095	0.910282		2.16095	0.911445		2.16095	0.910244		2.16095	0.912169		2.16095	0.912213		2.16095	0.911754		2.16095	0.910157		2.16095	0.909436
2.23547	0.899196		2.23547	0.899665		2.23547	0.90085		2.23547	0.899027		2.23547	0.903885		2.23547	0.905264		2.23547	0.907626		2.23547	0.909022		2.23547	0.909256		2.23547	0.909843		2.23547	0.909755		2.23547	0.909402		2.23547	0.911007		2.23547	0.90991		2.23547	0.90999		2.23547	0.906955
2.30998	0.899656		2.30998	0.898505		2.30998	0.898091		2.30998	0.898225		2.30998	0.901971		2.30998	0.903787		2.30998	0.90633		2.30998	0.906766		2.30998	0.909537		2.30998	0.908895		2.30998	0.909013		2.30998	0.908137		2.30998	0.909189		2.30998	0.912082		2.30998	0.910152		2.30998	0.905616
2.3845	0.897798		2.3845	0.899402		2.3845	0.897102		2.3845	0.898755		2.3845	0.900566		2.3845	0.903931		2.3845	0.905722		2.3845	0.904976		2.3845	0.907647		2.3845	0.907009		2.3845	0.905773		2.3845	0.908179		2.3845	0.909755		2.3845	0.907877		2.3845	0.90842		2.3845	0.905753
2.45901	0.896671		2.45901	0.89669		2.45901	0.895829		2.45901	0.898217		2.45901	0.899342		2.45901	0.901265		2.45901	0.90555		2.45901	0.903881		2.45901	0.906848		2.45901	0.906953		2.45901	0.906453		2.45901	0.906793		2.45901	0.907292		2.45901	0.908452		2.45901	0.906705		2.45901	0.905432
2.53353	0.895833		2.53353	0.895105		2.53353	0.894617		2.53353	0.895059		2.53353	0.897391		2.53353	0.90122		2.53353	0.904781		2.53353	0.902774		2.53353	0.905432		2.53353	0.903974		2.53353	0.903975		2.53353	0.908574		2.53353	0.905961		2.53353	0.907094		2.53353	0.906017		2.53353	0.903901
2.60805	0.895656		2.60805	0.894364		2.60805	0.894801		2.60805	0.894595		2.60805	0.897108		2.60805	0.899187		2.60805	0.902171		2.60805	0.901967		2.60805	0.905812		2.60805	0.905157		2.60805	0.903579		2.60805	0.906408		2.60805	0.904857		2.60805	0.905749		2.60805	0.905436		2.60805	0.90373
2.68256	0.894346		2.68256	0.892978		2.68256	0.894366		2.68256	0.894372		2.68256	0.896019		2.68256	0.897477		2.68256	0.903285		2.68256	0.901695		2.68256	0.904785		2.68256	0.904805		2.68256	0.901698		2.68256	0.904806		2.68256	0.904664		2.68256	0.904594		2.68256	0.903905		2.68256	0.901571
2.75708	0.892434		2.75708	0.893179		2.75708	0.894053		2.75708	0.892506		2.75708	0.895856		2.75708	0.897024		2.75708	0.901192		2.75708	0.899843		2.75708	0.903734		2.75708	0.902786		2.75708	0.901446		2.75708	0.903767		2.75708	0.903707		2.75708	0.903091		2.75708	0.9039		2.75708	0.900929
2.83159	0.8929		2.83159	0.891014		2.83159	0.890261		2.83159	0.891469		2.83159	0.895027		2.83159	0.896005		2.83159	0.901128		2.83159	0.898093		2.83159	0.902165		2.83159	0.901603		2.83159	0.899432		2.83159	0.903804		2.83159	0.903707		2.83159	0.902125		2.83159	0.902017		2.83159	0.897902
2.90611	0.890776		2.90611	0.8905		2.90611	0.888642		2.90611	0.890111		2.90611	0.89345		2.90611	0.896194		2.90611	0.89974		2.90611	0.89832		2.90611	0.902205		2.90611	0.899795		2.90611	0.900117		2.90611	0.901933		2.90611	0.901674		2.90611	0.901026		2.90611	0.900961		2.90611	0.898421
2.98062	0.890044		2.98062	0.889837		2.98062	0.889758		2.98062	0.888596		2.98062	0.892329		2.98062	0.893801		2.98062	0.897534		2.98062	0.89804		2.98062	0.89881		2.98062	0.898997		2.98062	0.898556		2.98062	0.900099		2.98062	0.901855		2.98062	0.901935		2.98062	0.899033		2.98062	0.896829
3.05514	0.889384		3.05514	0.887668		3.05514	0.888709		3.05514	0.88871		3.05514	0.890372		3.05514	0.89294		3.05514	0.896179		3.05514	0.895657		3.05514	0.900428		3.05514	0.899561		3.05514	0.89904		3.05514	0.899308		3.05514	0.900972		3.05514	0.899529		3.05514	0.898491		3.05514	0.899186
3.12966	0.887442		3.12966	0.886644		3.12966	0.886849		3.12966	0.887199		3.12966	0.890678		3.12966	0.892967		3.12966	0.896098		3.12966	0.895241		3.12966	0.899219		3.12966	0.898646		3.12966	0.897072		3.12966	0.899904		3.12966	0.898599		3.12966	0.899138		3.12966	0.897458		3.12966	0.897143
3.20417	0.887796		3.20417	0.88596		3.20417	0.885536		3.20417	0.885855		3.20417	0.889626		3.20417	0.891723		3.20417	0.894979		3.20417	0.894731		3.20417	0.898726		3.20417	0.898958		3.20417	0.89597		3.20417	0.897679		3.20417	0.89882		3.20417	0.899283		3.20417	0.899609		3.20417	0.896597
3.27869	0.885118		3.27869	0.88545		3.27869	0.884944		3.27869	0.886087		3.27869	0.887985		3.27869	0.890328		3.27869	0.895049		3.27869	0.892076		3.27869	0.898154		3.27869	0.896989		3.27869	0.893827		3.27869	0.898976		3.27869	0.8972		3.27869	0.898235		3.27869	0.896843		3.27869	0.894711
3.3532	0.885832		3.3532	0.884322		3.3532	0.883654		3.3532	0.885224		3.3532	0.887647		3.3532	0.888546		3.3532	0.89343		3.3532	0.891491		3.3532	0.898104		3.3532	0.895599		3.3532	0.894476		3.3532	0.897927		3.3532	0.896311		3.3532	0.896953		3.3532	0.896324		3.3532	0.893959
3.42772	0.884433		3.42772	0.88324		3.42772	0.882945		3.42772	0.884734		3.42772	0.885774		3.42772	0.88873		3.42772	0.893354		3.42772	0.890865		3.42772	0.896575		3.42772	0.894796		3.42772	0.894347		3.42772	0.895861		3.42772	0.895705		3.42772	0.897483		3.42772	0.894932		3.42772	0.893413
3.50223	0.883755		3.50223	0.8824		3.50223	0.881817		3.50223	0.882483		3.50223	0.885649		3.50223	0.888896		3.50223	0.891918		3.50223	0.891705		3.50223	0.894971		3.50223	0.894043		3.50223	0.891746		3.50223	0.895297		3.50223	0.894748		3.50223	0.896088		3.50223	0.894094		3.50223	0.892702
3.57675	0.881501		3.57675	0.882178		3.57675	0.881119		3.57675	0.882978		3.57675	0.885375		3.57675	0.886607		3.57675	0.892558		3.57675	0.890491		3.57675	0.893451		3.57675	0.894684		3.57675	0.892663		3.57675	0.896182		3.57675	0.89455		3.57675	0.893385		3.57675	0.892977		3.57675	0.890953
3.65126	0.881076		3.65126	0.88119		3.65126	0.88032		3.65126	0.881818		3.65126	0.885978		3.65126	0.887437		3.65126	0.891956		3.65126	0.888412		3.65126	0.894862		3.65126	0.895097		3.65126	0.893719		3.65126	0.893336		3.65126	0.894057		3.65126	0.895229		3.65126	0.894005		3.65126	0.890468
3.72578	0.879784		3.72578	0.879672		3.72578	0.879315		3.72578	0.880342		3.72578	0.882965		3.72578	0.886387		3.72578	0.890417		3.72578	0.887894		3.72578	0.892844		3.72578	0.892414		3.72578	0.889958		3.72578	0.893969		3.72578	0.893695		3.72578	0.895456		3.72578	0.890999		3.72578	0.890796
3.8003	0.87989		3.8003	0.87947		3.8003	0.879432		3.8003	0.87997		3.8003	0.881305		3.8003	0.885036		3.8003	0.890578		3.8003	0.887535		3.8003	0.892361		3.8003	0.89315		3.8003	0.888995		3.8003	0.892524		3.8003	0.892732		3.8003	0.893057		3.8003	0.892234		3.8003	0.888459
3.87481	0.878509		3.87481	0.876869		3.87481	0.877204		3.87481	0.878174		3.87481	0.881055		3.87481	0.883061		3.87481	0.889126		3.87481	0.887223		3.87481	0.892637		3.87481	0.891348		3.87481	0.889144		3.87481	0.892266		3.87481	0.890036		3.87481	0.89204		3.87481	0.892614		3.87481	0.888978
3.94933	0.877217		3.94933	0.876927		3.94933	0.877372		3.94933	0.878201		3.94933	0.880424		3.94933	0.883003		3.94933	0.888276		3.94933	0.886375		3.94933	0.890767		3.94933	0.890176		3.94933	0.888495		3.94933	0.891201		3.94933	0.891503		3.94933	0.894345		3.94933	0.889602		3.94933	0.888821
4.02384	0.878887		4.02384	0.8777		4.02384	0.877389		4.02384	0.877093		4.02384	0.879822		4.02384	0.882478		4.02384	0.888303		4.02384	0.885741		4.02384	0.889213		4.02384	0.889557		4.02384	0.888516		4.02384	0.888829		4.02384	0.88887		4.02384	0.891365		4.02384	0.888792		4.02384	0.886245
4.09836	0.876474		4.09836	0.876499		4.09836	0.875758		4.09836	0.877101		4.09836	0.87844		4.09836	0.880925		4.09836	0.88748		4.09836	0.885449		4.09836	0.889558		4.09836	0.888837		4.09836	0.888052		4.09836	0.889446		4.09836	0.889934		4.09836	0.891699		4.09836	0.888971		4.09836	0.886983
4.17287	0.875323		4.17287	0.876091		4.17287	0.874367		4.17287	0.875967		4.17287	0.877968		4.17287	0.88145		4.17287	0.88671		4.17287	0.884279		4.17287	0.888709		4.17287	0.887515		4.17287	0.886404		4.17287	0.888698		4.17287	0.888048		4.17287	0.889786		4.17287	0.888094		4.17287	0.887161
4.24739	0.876084		4.24739	0.874597		4.24739	0.874591		4.24739	0.874194		4.24739	0.878561		4.24739	0.880395		4.24739	0.884833		4.24739	0.885012		4.24739	0.888177		4.24739	0.88959		4.24739	0.88524		4.24739	0.887396		4.24739	0.887765		4.24739	0.888889		4.24739	0.887831		4.24739	0.885753
4.3219	0.875022		4.3219	0.872037		4.3219	0.872804		4.3219	0.874807		4.3219	0.878213		4.3219	0.879395		4.3219	0.884526		4.3219	0.882106		4.3219	0.888413		4.3219	0.888341		4.3219	0.886285		4.3219	0.888819		4.3219	0.887392		4.3219	0.888839		4.3219	0.887417		4.3219	0.884058
4.39642	0.874184		4.39642	0.873445		4.39642	0.872446		4.39642	0.874308		4.39642	0.877764		4.39642	0.878075		4.39642	0.884424		4.39642	0.882645		4.39642	0.887851		4.39642	0.886176		4.39642	0.885214		4.39642	0.889098		4.39642	0.885879		4.39642	0.888529		4.39642	0.885792		4.39642	0.882774
4.47094	0.872762		4.47094	0.87286		4.47094	0.872217		4.47094	0.871926		4.47094	0.875613		4.47094	0.87742		4.47094	0.884795		4.47094	0.881571		4.47094	0.887254		4.47094	0.88626		4.47094	0.882138		4.47094	0.887564		4.47094	0.885427		4.47094	0.886787		4.47094	0.884372		4.47094	0.883368
4.54545	0.872231		4.54545	0.870967		4.54545	0.871759		4.54545	0.871829		4.54545	0.876099		4.54545	0.878533		4.54545	0.881885		4.54545	0.881448		4.54545	0.886287		4.54545	0.886226		4.54545	0.883524		4.54545	0.887464		4.54545	0.883835		4.54545	0.885814		4.54545	0.885317		4.54545	0.88166
4.61997	0.87265		4.61997	0.871288		4.61997	0.870006		4.61997	0.870292		4.61997	0.875409		4.61997	0.876087		4.61997	0.883068		4.61997	0.880558		4.61997	0.885117		4.61997	0.884803		4.61997	0.884281		4.61997	0.885667		4.61997	0.886083		4.61997	0.88685		4.61997	0.885216		4.61997	0.880949
4.69448	0.870095		4.69448	0.870449		4.69448	0.868911		4.69448	0.87119		4.69448	0.873286		4.69448	0.87549		4.69448	0.88182		4.69448	0.878756		4.69448	0.883898		4.69448	0.884346		4.69448	0.881577		4.69448	0.884038		4.69448	0.884039		4.69448	0.885833		4.69448	0.883188		4.69448	0.88166
4.769	0.87111		4.769	0.869346		4.769	0.868961		4.769	0.869973		4.769	0.87311		4.769	0.875831		4.769	0.882767		4.769	0.88041		4.769	0.884249		4.769	0.884775		4.769	0.882695		4.769	0.883848		4.769	0.883648		4.769	0.886174		4.769	0.883814		4.769	0.880847
4.84351	0.869517		4.84351	0.869037		4.84351	0.868626		4.84351	0.871002		4.84351	0.871774		4.84351	0.873901		4.84351	0.880174		4.84351	0.878216		4.84351	0.883		4.84351	0.882454		4.84351	0.881206		4.84351	0.883986		4.84351	0.884537		4.84351	0.885278		4.84351	0.88249		4.84351	0.879392
4.91803	0.870314		4.91803	0.867391		4.91803	0.868001		4.91803	0.868961		4.91803	0.871765		4.91803	0.872842		4.91803	0.879867		4.91803	0.877982		4.91803	0.882877		4.91803	0.882722		4.91803	0.880675		4.91803	0.884307		4.91803	0.883943		4.91803	0.883718		4.91803	0.882976		4.91803	0.879986
4.99255	0.86819		4.99255	0.867358		4.99255	0.865471		4.99255	0.868672		4.99255	0.871584		4.99255	0.872941		4.99255	0.878367		4.99255	0.876603		4.99255	0.882482		4.99255	0.882923		4.99255	0.879733		4.99255	0.881977		4.99255	0.883246		4.99255	0.885132		4.99255	0.881199		4.99255	0.880382
5.06706	0.868331		5.06706	0.866494		5.06706	0.865209		5.06706	0.86735		5.06706	0.870773		5.06706	0.872582		5.06706	0.879518		5.06706	0.876364		5.06706	0.883607		5.06706	0.88092		5.06706	0.878785		5.06706	0.883216		5.06706	0.882012		5.06706	0.883055		5.06706	0.882126		5.06706	0.879316
5.14158	0.867865		5.14158	0.866086		5.14158	0.864834		5.14158	0.866487		5.14158	0.869781		5.14158	0.872398		5.14158	0.87806		5.14158	0.875006		5.14158	0.881392		5.14158	0.88034		5.14158	0.878574		5.14158	0.883269		5.14158	0.881978		5.14158	0.8832		5.14158	0.879752		5.14158	0.87851
5.21609	0.867245		5.21609	0.865304		5.21609	0.865287		5.21609	0.866062		5.21609	0.870314		5.21609	0.872075		5.21609	0.877855		5.21609	0.875812		5.21609	0.88226		5.21609	0.879821		5.21609	0.87948		5.21609	0.88144		5.21609	0.879945		5.21609	0.88397		5.21609	0.880277		5.21609	0.878004
5.29061	0.867222		5.29061	0.864868		5.29061	0.86427		5.29061	0.863785		5.29061	0.869624		5.29061	0.871756		5.29061	0.877119		5.29061	0.874928		5.29061	0.88117		5.29061	0.879771		5.29061	0.877389		5.29061	0.881946		5.29061	0.881072		5.29061	0.882404		5.29061	0.88002		5.29061	0.878613
5.36512	0.864461		5.36512	0.864893		5.36512	0.864885		5.36512	0.864845		5.36512	0.868377		5.36512	0.871195		5.36512	0.877065		5.36512	0.874075		5.36512	0.879621		5.36512	0.880117		5.36512	0.877008		5.36512	0.880496		5.36512	0.880052		5.36512	0.881432		5.36512	0.878886		5.36512	0.877465
5.43964	0.863322		5.43964	0.863205		5.43964	0.862556		5.43964	0.864468		5.43964	0.867598		5.43964	0.871451		5.43964	0.876618		5.43964	0.873347		5.43964	0.879423		5.43964	0.878867		5.43964	0.876879		5.43964	0.880122		5.43964	0.878767		5.43964	0.88159		5.43964	0.878534		5.43964	0.876433
5.51415	0.864059		5.51415	0.865386		5.51415	0.862137		5.51415	0.863225		5.51415	0.866675		5.51415	0.868996		5.51415	0.875903		5.51415	0.873269		5.51415	0.877489		5.51415	0.87928		5.51415	0.875658		5.51415	0.880781		5.51415	0.879259		5.51415	0.880403		5.51415	0.878752		5.51415	0.875873
5.58867	0.863387		5.58867	0.86244		5.58867	0.861646		5.58867	0.861714		5.58867	0.867162		5.58867	0.867708		5.58867	0.878189		5.58867	0.872145		5.58867	0.879181		5.58867	0.877455		5.58867	0.876122		5.58867	0.878815		5.58867	0.878081		5.58867	0.880611		5.58867	0.879271		5.58867	0.874841
5.66319	0.863263		5.66319	0.862526		5.66319	0.862176		5.66319	0.8616		5.66319	0.86726		5.66319	0.867717		5.66319	0.874585		5.66319	0.871667		5.66319	0.878466		5.66319	0.87639		5.66319	0.87538		5.66319	0.879684		5.66319	0.879752		5.66319	0.88034		5.66319	0.878327		5.66319	0.875777
5.7377	0.86341		5.7377	0.861156		5.7377	0.859691		5.7377	0.862585		5.7377	0.866546		5.7377	0.868121		5.7377	0.874612		5.7377	0.870219		5.7377	0.878056		5.7377	0.876457		5.7377	0.876704		5.7377	0.880159		5.7377	0.876921		5.7377	0.88087		5.7377	0.876947		5.7377	0.875442
5.81222	0.861233		5.81222	0.860999		5.81222	0.860663		5.81222	0.860501		5.81222	0.864872		5.81222	0.867187		5.81222	0.875445		5.81222	0.872248		5.81222	0.876892		5.81222	0.878811		5.81222	0.874355		5.81222	0.877818		5.81222	0.877759		5.81222	0.878066		5.81222	0.877333		5.81222	0.874267
5.88673	0.861788		5.88673	0.861769		5.88673	0.858959		5.88673	0.860387		5.88673	0.864265		5.88673	0.868888		5.88673	0.875284		5.88673	0.87049		5.88673	0.877602		5.88673	0.877567		5.88673	0.87352		5.88673	0.875404		5.88673	0.877096		5.88673	0.877574		5.88673	0.876411		5.88673	0.873276
5.96125	0.861392		5.96125	0.861316		5.96125	0.857982		5.96125	0.860103		5.96125	0.864724		5.96125	0.867928		5.96125	0.873148		5.96125	0.870774		5.96125	0.878047		5.96125	0.874783		5.96125	0.874731		5.96125	0.876638		5.96125	0.877504		5.96125	0.878875		5.96125	0.87531		5.96125	0.872812
6.03576	0.861068		6.03576	0.859164		6.03576	0.860171		6.03576	0.858644		6.03576	0.863774		6.03576	0.864678		6.03576	0.872842		6.03576	0.869568		6.03576	0.876053		6.03576	0.876144		6.03576	0.873026		6.03576	0.876301		6.03576	0.876807		6.03576	0.87753		6.03576	0.874472		6.03576	0.871466
6.11028	0.861929		6.11028	0.859229		6.11028	0.856441		6.11028	0.859209		6.11028	0.863092		6.11028	0.867066		6.11028	0.872971		6.11028	0.869622		6.11028	0.876078		6.11028	0.875982		6.11028	0.873046		6.11028	0.876733		6.11028	0.876003		6.11028	0.877984		6.11028	0.873796		6.11028	0.872634
6.18479	0.860472		6.18479	0.858464		6.18479	0.858675		6.18479	0.859411		6.18479	0.862378		6.18479	0.863947		6.18479	0.871852		6.18479	0.86965		6.18479	0.874676		6.18479	0.875112		6.18479	0.871027		6.18479	0.875252		6.18479	0.87521		6.18479	0.875477		6.18479	0.874438		6.18479	0.871445
6.25931	0.860336		6.25931	0.858028		6.25931	0.856469		6.25931	0.857392		6.25931	0.862058		6.25931	0.863704		6.25931	0.873014		6.25931	0.869124		6.25931	0.874326		6.25931	0.875793		6.25931	0.873082		6.25931	0.874551		6.25931	0.874021		6.25931	0.876601		6.25931	0.873002		6.25931	0.873071
6.33383	0.858902		6.33383	0.857534		6.33383	0.857033		6.33383	0.856669		6.33383	0.861669		6.33383	0.863812		6.33383	0.871158		6.33383	0.867522		6.33383	0.874805		6.33383	0.873606		6.33383	0.871681		6.33383	0.874877		6.33383	0.873942		6.33383	0.87705		6.33383	0.874176		6.33383	0.8704
6.40834	0.858531		6.40834	0.856456		6.40834	0.857094		6.40834	0.857077		6.40834	0.861465		6.40834	0.862484		6.40834	0.870518		6.40834	0.867741		6.40834	0.874129		6.40834	0.873154		6.40834	0.869688		6.40834	0.873665		6.40834	0.873273		6.40834	0.876317		6.40834	0.874528		6.40834	0.870113
6.48286	0.858478		6.48286	0.855744		6.48286	0.855944		6.48286	0.855071		6.48286	0.860223		6.48286	0.86321		6.48286	0.870346		6.48286	0.867411		6.48286	0.873591		6.48286	0.873583		6.48286	0.870496		6.48286	0.873633		6.48286	0.873608		6.48286	0.876008		6.48286	0.872975		6.48286	0.871869
6.55737	0.857888		6.55737	0.856949		6.55737	0.855849		6.55737	0.856065		6.55737	0.860176		6.55737	0.860195		6.55737	0.870249		6.55737	0.867		6.55737	0.873004		6.55737	0.87403		6.55737	0.870878		6.55737	0.874045		6.55737	0.873098		6.55737	0.875698		6.55737	0.872606		6.55737	0.871349
6.63189	0.857168		6.63189	0.855888		6.63189	0.854765		6.63189	0.856643		6.63189	0.85918		6.63189	0.862093		6.63189	0.869506		6.63189	0.866242		6.63189	0.872032		6.63189	0.871893		6.63189	0.868518		6.63189	0.874066		6.63189	0.872067		6.63189	0.876753		6.63189	0.873449		6.63189	0.869996
6.7064	0.857923		6.7064	0.854686		6.7064	0.855162		6.7064	0.856043		6.7064	0.860158		6.7064	0.862156		6.7064	0.869565		6.7064	0.865477		6.7064	0.872584		6.7064	0.873332		6.7064	0.870955		6.7064	0.873649		6.7064	0.871246		6.7064	0.872907		6.7064	0.871784		6.7064	0.869983
6.78092	0.855846		6.78092	0.854011		6.78092	0.854581		6.78092	0.855115		6.78092	0.857692		6.78092	0.859728		6.78092	0.868732		6.78092	0.86516		6.78092	0.87367		6.78092	0.871859		6.78092	0.868013		6.78092	0.873175		6.78092	0.87282		6.78092	0.875244		6.78092	0.870924		6.78092	0.868008
6.85544	0.856436		6.85544	0.854036		6.85544	0.854536		6.85544	0.854795		6.85544	0.858192		6.85544	0.859687		6.85544	0.868108		6.85544	0.863937		6.85544	0.872145		6.85544	0.870414		6.85544	0.869409		6.85544	0.871736		6.85544	0.872532		6.85544	0.873804		6.85544	0.873137		6.85544	0.868124
6.92995	0.856342		6.92995	0.853534		6.92995	0.853313		6.92995	0.853412		6.92995	0.857205		6.92995	0.859809		6.92995	0.868742		6.92995	0.863365		6.92995	0.871074		6.92995	0.870877		6.92995	0.868755		6.92995	0.872342		6.92995	0.870799		6.92995	0.872623		6.92995	0.87084		6.92995	0.867892
7.00447	0.856106		7.00447	0.853653		7.00447	0.85204		7.00447	0.854616		7.00447	0.857928		7.00447	0.8601		7.00447	0.870464		7.00447	0.863538		7.00447	0.871953		7.00447	0.871134		7.00447	0.868956		7.00447	0.870829		7.00447	0.871829		7.00447	0.872503		7.00447	0.869488		7.00447	0.868363
7.07898	0.853987		7.07898	0.853254		7.07898	0.852766		7.07898	0.852304		7.07898	0.857279		7.07898	0.859759		7.07898	0.86764		7.07898	0.864662		7.07898	0.870038		7.07898	0.87023		7.07898	0.867622		7.07898	0.872042		7.07898	0.871303		7.07898	0.872844		7.07898	0.870488		7.07898	0.866512
7.1535	0.855586		7.1535	0.851579		7.1535	0.85185		7.1535	0.852378		7.1535	0.85511		7.1535	0.859396		7.1535	0.868382		7.1535	0.863591		7.1535	0.870245		7.1535	0.871089		7.1535	0.868776		7.1535	0.872458		7.1535	0.871065		7.1535	0.872061		7.1535	0.869147		7.1535	0.865897
7.22801	0.855451		7.22801	0.852591		7.22801	0.851621		7.22801	0.852558		7.22801	0.855411		7.22801	0.859113		7.22801	0.86637		7.22801	0.863036		7.22801	0.8703		7.22801	0.870013		7.22801	0.868039		7.22801	0.870724		7.22801	0.87		7.22801	0.872074		7.22801	0.86879		7.22801	0.865958
7.30253	0.855645		7.30253	0.852558		7.30253	0.849867		7.30253	0.851253		7.30253	0.855606		7.30253	0.857205		7.30253	0.866284		7.30253	0.862196		7.30253	0.869476		7.30253	0.869951		7.30253	0.866205		7.30253	0.870323		7.30253	0.870515		7.30253	0.870893		7.30253	0.868248		7.30253	0.865459
7.37704	0.853492		7.37704	0.850311		7.37704	0.850002		7.37704	0.850631		7.37704	0.855856		7.37704	0.857228		7.37704	0.865665		7.37704	0.862422		7.37704	0.870315		7.37704	0.867998		7.37704	0.867045		7.37704	0.868389		7.37704	0.869224		7.37704	0.871228		7.37704	0.870326		7.37704	0.866819
7.45156	0.854176		7.45156	0.85055		7.45156	0.851978		7.45156	0.850119		7.45156	0.855425		7.45156	0.856752		7.45156	0.86495		7.45156	0.861459		7.45156	0.869303		7.45156	0.86835		7.45156	0.866066		7.45156	0.868436		7.45156	0.868024		7.45156	0.870975		7.45156	0.868404		7.45156	0.86604
7.52608	0.851863		7.52608	0.849101		7.52608	0.850124		7.52608	0.850872		7.52608	0.854377		7.52608	0.857618		7.52608	0.865622		7.52608	0.860373		7.52608	0.868341		7.52608	0.868071		7.52608	0.865942		7.52608	0.868716		7.52608	0.869394		7.52608	0.870173		7.52608	0.866963		7.52608	0.865425
7.60059	0.853657		7.60059	0.849574		7.60059	0.849169		7.60059	0.849545		7.60059	0.854122		7.60059	0.857834		7.60059	0.865945		7.60059	0.860278		7.60059	0.869959		7.60059	0.868121		7.60059	0.864191		7.60059	0.869322		7.60059	0.868658		7.60059	0.870388		7.60059	0.868175		7.60059	0.865138
7.67511	0.853155		7.67511	0.849883		7.67511	0.849225		7.67511	0.848779		7.67511	0.855091		7.67511	0.85642		7.67511	0.86573		7.67511	0.86164		7.67511	0.867068		7.67511	0.866788		7.67511	0.865123		7.67511	0.870445		7.67511	0.868522		7.67511	0.871095		7.67511	0.866315		7.67511	0.862713
7.74962	0.851155		7.74962	0.84962		7.74962	0.849209		7.74962	0.848568		7.74962	0.852569		7.74962	0.855724		7.74962	0.864369		7.74962	0.861389		7.74962	0.870216		7.74962	0.868406		7.74962	0.864315		7.74962	0.867988		7.74962	0.867916		7.74962	0.868708		7.74962	0.86708		7.74962	0.864913
7.82414	0.851338		7.82414	0.850937		7.82414	0.848237		7.82414	0.848258		7.82414	0.852467		7.82414	0.855307		7.82414	0.863793		7.82414	0.860401		7.82414	0.867132		7.82414	0.866129		7.82414	0.863903		7.82414	0.868015		7.82414	0.866047		7.82414	0.870053		7.82414	0.867225		7.82414	0.865179
7.89865	0.850854		7.89865	0.849208		7.89865	0.849901		7.89865	0.849558		7.89865	0.853543		7.89865	0.854104		7.89865	0.863497		7.89865	0.859471		7.89865	0.866836		7.89865	0.868646		7.89865	0.86365		7.89865	0.867482		7.89865	0.866795		7.89865	0.870388		7.89865	0.86632		7.89865	0.861906
7.97317	0.85004		7.97317	0.848619		7.97317	0.847561		7.97317	0.848927		7.97317	0.853093		7.97317	0.854652		7.97317	0.864907		7.97317	0.859726		7.97317	0.867186		7.97317	0.867128		7.97317	0.863903		7.97317	0.86773		7.97317	0.867865		7.97317	0.868696		7.97317	0.866186		7.97317	0.862316
8.04768	0.851486		8.04768	0.84899		8.04768	0.846154		8.04768	0.847881		8.04768	0.853631		8.04768	0.855065		8.04768	0.863422		8.04768	0.859615		8.04768	0.866066		8.04768	0.868216		8.04768	0.863892		8.04768	0.866945		8.04768	0.865668		8.04768	0.867572		8.04768	0.865639		8.04768	0.862583
8.1222	0.852111		8.1222	0.847582		8.1222	0.846919		8.1222	0.848047		8.1222	0.85307		8.1222	0.85427		8.1222	0.863895		8.1222	0.858944		8.1222	0.866298		8.1222	0.863714		8.1222	0.861888		8.1222	0.866681		8.1222	0.866795		8.1222	0.868487		8.1222	0.86389		8.1222	0.86317
8.19672	0.850919		8.19672	0.847957		8.19672	0.84588		8.19672	0.847596		8.19672	0.850632		8.19672	0.855127		8.19672	0.860915		8.19672	0.857783		8.19672	0.866826		8.19672	0.86522		8.19672	0.863197		8.19672	0.867292		8.19672	0.865702		8.19672	0.869062		8.19672	0.86556		8.19672	0.86246
8.27123	0.850376		8.27123	0.846582		8.27123	0.846634		8.27123	0.846077		8.27123	0.852435		8.27123	0.854068		8.27123	0.860829		8.27123	0.856775		8.27123	0.8658		8.27123	0.866302		8.27123	0.862563		8.27123	0.865184		8.27123	0.866059		8.27123	0.867471		8.27123	0.863404		8.27123	0.863232
8.34575	0.850748		8.34575	0.847298		8.34575	0.847053		8.34575	0.847036		8.34575	0.850826		8.34575	0.854472		8.34575	0.862351		8.34575	0.858376		8.34575	0.866229		8.34575	0.865638		8.34575	0.86261		8.34575	0.867672		8.34575	0.866081		8.34575	0.866745		8.34575	0.865393		8.34575	0.861578
8.42026	0.848341		8.42026	0.847055		8.42026	0.845165		8.42026	0.845135		8.42026	0.851721		8.42026	0.852879		8.42026	0.860684		8.42026	0.858232		8.42026	0.864823		8.42026	0.86267		8.42026	0.86399		8.42026	0.866702		8.42026	0.864564		8.42026	0.868879		8.42026	0.863465		8.42026	0.865343
8.49478	0.849727		8.49478	0.845961		8.49478	0.843613		8.49478	0.846375		8.49478	0.850511		8.49478	0.853866		8.49478	0.862421		8.49478	0.858389		8.49478	0.86581		8.49478	0.86464		8.49478	0.861564		8.49478	0.865337		8.49478	0.865498		8.49478	0.866877		8.49478	0.862331		8.49478	0.862002
8.56929	0.849899		8.56929	0.844751		8.56929	0.844032		8.56929	0.843787		8.56929	0.850428		8.56929	0.852758		8.56929	0.862265		8.56929	0.858738		8.56929	0.865291		8.56929	0.864015		8.56929	0.86245		8.56929	0.863951		8.56929	0.864649		8.56929	0.866315		8.56929	0.862906		8.56929	0.859467
8.64381	0.84827		8.64381	0.845232		8.64381	0.843976		8.64381	0.844544		8.64381	0.849862		8.64381	0.853103		8.64381	0.861512		8.64381	0.856549		8.64381	0.864852		8.64381	0.863278		8.64381	0.861394		8.64381	0.865332		8.64381	0.864258		8.64381	0.867281		8.64381	0.863867		8.64381	0.858825
8.71833	0.849208		8.71833	0.8445		8.71833	0.843909		8.71833	0.845547		8.71833	0.848356		8.71833	0.852322		8.71833	0.860802		8.71833	0.856335		8.71833	0.86464		8.71833	0.86233		8.71833	0.861883		8.71833	0.86501		8.71833	0.864309		8.71833	0.8673		8.71833	0.862571		8.71833	0.860752
8.79284	0.847037		8.79284	0.844858		8.79284	0.844495		8.79284	0.843528		8.79284	0.849983		8.79284	0.853225		8.79284	0.86148		8.79284	0.856178		8.79284	0.864517		8.79284	0.863172		8.79284	0.860755		8.79284	0.864615		8.79284	0.864309		8.79284	0.866265		8.79284	0.863689		8.79284	0.86095
8.86736	0.846305		8.86736	0.844944		8.86736	0.843049		8.86736	0.843375		8.86736	0.848198		8.86736	0.85142		8.86736	0.861566		8.86736	0.856545		8.86736	0.864601		8.86736	0.86238		8.86736	0.861172		8.86736	0.863434		8.86736	0.86385		8.86736	0.865204		8.86736	0.863957		8.86736	0.860888
8.94187	0.848536		8.94187	0.845755		8.94187	0.843741		8.94187	0.844417		8.94187	0.84894		8.94187	0.852569		8.94187	0.859339		8.94187	0.855869		8.94187	0.864349		8.94187	0.862129		8.94187	0.86125		8.94187	0.864662		8.94187	0.863963		8.94187	0.864812		8.94187	0.861264		8.94187	0.858305
9.01639	0.846453		9.01639	0.844372		9.01639	0.842747		9.01639	0.842828		9.01639	0.849032		9.01639	0.851802		9.01639	0.860942		9.01639	0.856331		9.01639	0.863278		9.01639	0.859384		9.01639	0.860276		9.01639	0.863945		9.01639	0.863493		9.01639	0.866233		9.01639	0.862337		9.01639	0.860061
9.0909	0.846382		9.0909	0.843718		9.0909	0.842088		9.0909	0.842779		9.0909	0.849783		9.0909	0.849396		9.0909	0.860646		9.0909	0.855832		9.0909	0.864754		9.0909	0.860483		9.0909	0.861512		9.0909	0.862775		9.0909	0.861251		9.0909	0.865747		9.0909	0.862029		9.0909	0.860253
9.16542	0.846287		9.16542	0.843137		9.16542	0.84244		9.16542	0.841961		9.16542	0.847799		9.16542	0.850859		9.16542	0.859226		9.16542	0.855392		9.16542	0.861403		9.16542	0.862893		9.16542	0.860302		9.16542	0.863128		9.16542	0.863437		9.16542	0.865722		9.16542	0.861185		9.16542	0.85931
9.23993	0.844565		9.23993	0.843985		9.23993	0.841999		9.23993	0.841448		9.23993	0.848105		9.23993	0.850545		9.23993	0.859253		9.23993	0.855458		9.23993	0.862109		9.23993	0.859144		9.23993	0.859215		9.23993	0.863128		9.23993	0.863063		9.23993	0.864964		9.23993	0.862683		9.23993	0.85877
9.31445	0.847019		9.31445	0.843142		9.31445	0.841909		9.31445	0.841181		9.31445	0.84824		9.31445	0.848552		9.31445	0.860732		9.31445	0.854174		9.31445	0.861763		9.31445	0.862135		9.31445	0.860018		9.31445	0.861231		9.31445	0.862378		9.31445	0.865179		9.31445	0.860783		9.31445	0.857827
9.38897	0.846028		9.38897	0.842018		9.38897	0.841485		9.38897	0.840721		9.38897	0.846024		9.38897	0.849854		9.38897	0.859796		9.38897	0.854009		9.38897	0.862657		9.38897	0.862196		9.38897	0.859199		9.38897	0.862064		9.38897	0.861828		9.38897	0.863278		9.38897	0.861834		9.38897	0.85892
9.46348	0.84604		9.46348	0.842261		9.46348	0.841329		9.46348	0.841404		9.46348	0.847836		9.46348	0.84914		9.46348	0.85978		9.46348	0.852453		9.46348	0.862962		9.46348	0.860533		9.46348	0.85938		9.46348	0.862312		9.46348	0.862123		9.46348	0.862362		9.46348	0.859537		9.46348	0.857513
9.538	0.844287		9.538	0.840796		9.538	0.840106		9.538	0.84246		9.538	0.847095		9.538	0.849311		9.538	0.857902		9.538	0.85403		9.538	0.862938		9.538	0.862285		9.538	0.858154		9.538	0.862686		9.538	0.862921		9.538	0.86264		9.538	0.859353		9.538	0.856474
9.61251	0.844659		9.61251	0.842244		9.61251	0.84177		9.61251	0.84126		9.61251	0.84626		9.61251	0.847053		9.61251	0.858451		9.61251	0.853552		9.61251	0.861087		9.61251	0.86103		9.61251	0.859411		9.61251	0.8616		9.61251	0.862293		9.61251	0.863171		9.61251	0.859314		9.61251	0.85646
9.68703	0.845473		9.68703	0.842808		9.68703	0.839815		9.68703	0.840844		9.68703	0.845913		9.68703	0.849387		9.68703	0.859016		9.68703	0.853988		9.68703	0.860022		9.68703	0.859931		9.68703	0.857911		9.68703	0.862401		9.68703	0.861845		9.68703	0.86156		9.68703	0.860822		9.68703	0.85741
9.76154	0.843921		9.76154	0.841981		9.76154	0.840681		9.76154	0.841054		9.76154	0.846511		9.76154	0.847237		9.76154	0.858424		9.76154	0.85384		9.76154	0.862069		9.76154	0.858999		9.76154	0.857824		9.76154	0.8617		9.76154	0.861137		9.76154	0.861308		9.76154	0.860219		9.76154	0.856747
9.83606	0.843514		9.83606	0.841466		9.83606	0.839167		9.83606	0.840542		9.83606	0.846511		9.83606	0.847785		9.83606	0.857391		9.83606	0.853515		9.83606	0.860258		9.83606	0.858949		9.83606	0.859184		9.83606	0.862475		9.83606	0.860169		9.83606	0.863095		9.83606	0.86223		9.83606	0.856939
9.91057	0.843703		9.91057	0.840162		9.91057	0.839296		9.91057	0.841588		9.91057	0.845078		9.91057	0.847583		9.91057	0.856633		9.91057	0.8537		9.91057	0.861176		9.91057	0.85886		9.91057	0.858195		9.91057	0.862148		9.91057	0.860316		9.91057	0.862261		9.91057	0.859856		9.91057	0.855805
9.98509	0.842499		9.98509	0.839861		9.98509	0.841736		9.98509	0.840056		9.98509	0.846946		9.98509	0.846044		9.98509	0.85773		9.98509	0.8524		9.98509	0.861226		9.98509	0.857197		9.98509	0.857448		9.98509	0.860693		9.98509	0.860543		9.98509	0.862968		9.98509	0.859101		9.98509	0.858476
10.0596	0.843414		10.0596	0.839775		10.0596	0.839357		10.0596	0.838768		10.0596	0.845125		10.0596	0.847628		10.0596	0.856434		10.0596	0.851827		10.0596	0.859908		10.0596	0.859468		10.0596	0.857319		10.0596	0.861911		10.0596	0.861171		10.0596	0.863941		10.0596	0.858118		10.0596	0.857171
10.1341	0.843626		10.1341	0.839265		10.1341	0.838933		10.1341	0.839622		10.1341	0.845954		10.1341	0.846829		10.1341	0.856181		10.1341	0.851951		10.1341	0.860693		10.1341	0.858307		10.1341	0.857345		10.1341	0.861473		10.1341	0.861041		10.1341	0.862362		10.1341	0.859208		10.1341	0.856795
10.2086	0.841632		10.2086	0.839273		10.2086	0.839028		10.2086	0.839885		10.2086	0.846381		10.2086	0.847408		10.2086	0.856762		10.2086	0.852502		10.2086	0.859775		10.2086	0.858714		10.2086	0.856315		10.2086	0.859713		10.2086	0.860237		10.2086	0.861844		10.2086	0.858979		10.2086	0.855866
10.2832	0.843438		10.2832	0.839643		10.2832	0.837866		10.2832	0.840205		10.2832	0.843873		10.2832	0.847143		10.2832	0.857149		10.2832	0.851259		10.2832	0.860471		10.2832	0.858954		10.2832	0.856778		10.2832	0.861036		10.2832	0.859297		10.2832	0.861775		10.2832	0.858599		10.2832	0.854513
10.3577	0.843556		10.3577	0.839857		10.3577	0.839318		10.3577	0.838939		10.3577	0.843192		10.3577	0.846353		10.3577	0.855105		10.3577	0.850428		10.3577	0.859666		10.3577	0.859284		10.3577	0.85617		10.3577	0.861663		10.3577	0.858085		10.3577	0.861762		10.3577	0.85814		10.3577	0.855101
10.4322	0.841727		10.4322	0.838162		10.4322	0.838654		10.4322	0.837976		10.4322	0.844392		10.4322	0.846035		10.4322	0.856208		10.4322	0.851111		10.4322	0.860101		10.4322	0.857989		10.4322	0.856201		10.4322	0.861015		10.4322	0.860401		10.4322	0.859849		10.4322	0.857884		10.4322	0.854691
10.5067	0.844281		10.5067	0.840429		10.5067	0.838246		10.5067	0.838576		10.5067	0.843581		10.5067	0.847121		10.5067	0.857585		10.5067	0.852334		10.5067	0.859148		10.5067	0.856801		10.5067	0.856088		10.5067	0.85936		10.5067	0.859665		10.5067	0.860064		10.5067	0.858554		10.5067	0.855798
10.5812	0.842582		10.5812	0.838939		10.5812	0.838888		10.5812	0.837135		10.5812	0.843739		10.5812	0.845595		10.5812	0.854519		10.5812	0.851198		10.5812	0.859864		10.5812	0.856862		10.5812	0.855769		10.5812	0.859043		10.5812	0.858691		10.5812	0.860796		10.5812	0.858392		10.5812	0.855162
10.6557	0.842234		10.6557	0.838849		10.6557	0.837297		10.6557	0.839342		10.6557	0.843164		10.6557	0.845792		10.6557	0.854944		10.6557	0.850391		10.6557	0.858655		10.6557	0.859044		10.6557	0.85668		10.6557	0.859181		10.6557	0.860288		10.6557	0.860007		10.6557	0.858258		10.6557	0.854807
10.7302	0.84211		10.7302	0.838079		10.7302	0.838307		10.7302	0.838155		10.7302	0.843164		10.7302	0.845231		10.7302	0.856089		10.7302	0.850942		10.7302	0.858744		10.7302	0.856488		10.7302	0.855676		10.7302	0.861078		10.7302	0.85843		10.7302	0.859211		10.7302	0.858744		10.7302	0.854301
10.8048	0.841608		10.8048	0.838758		10.8048	0.836827		10.8048	0.838519		10.8048	0.842802		10.8048	0.843849		10.8048	0.853755		10.8048	0.849189		10.8048	0.858872		10.8048	0.857387		10.8048	0.856407		10.8048	0.857942		10.8048	0.858691		10.8048	0.858832		10.8048	0.856358		10.8048	0.854158
10.8793	0.841201		10.8793	0.838302		10.8793	0.837341		10.8793	0.837166		10.8793	0.841861		10.8793	0.844868		10.8793	0.854997		10.8793	0.850136		10.8793	0.859696		10.8793	0.857102		10.8793	0.856737		10.8793	0.858095		10.8793	0.857592		10.8793	0.859868		10.8793	0.856168		10.8793	0.854185
10.9538	0.840204		10.9538	0.837598		10.9538	0.836403		10.9538	0.838291		10.9538	0.843294		10.9538	0.846412		10.9538	0.855664		10.9538	0.849839		10.9538	0.857786		10.9538	0.857225		10.9538	0.85293		10.9538	0.857968		10.9538	0.858504		10.9538	0.859912		10.9538	0.855408		10.9538	0.853044
11.0283	0.841638		11.0283	0.838042		11.0283	0.836956		11.0283	0.836982		11.0283	0.84327		11.0283	0.843669		11.0283	0.853669		11.0283	0.849946		11.0283	0.856735		11.0283	0.857732		11.0283	0.853342		11.0283	0.859892		11.0283	0.858345		11.0283	0.859571		11.0283	0.855766		11.0283	0.853256
11.1028	0.842523		11.1028	0.837046		11.1028	0.838408		11.1028	0.837547		11.1028	0.843437		11.1028	0.843427		11.1028	0.855465		11.1028	0.84981		11.1028	0.858181		11.1028	0.855791		11.1028	0.854182		11.1028	0.856603		11.1028	0.858419		11.1028	0.858384		11.1028	0.855805		11.1028	0.853823
11.1773	0.840446		11.1773	0.837577		11.1773	0.836325		11.1773	0.836474		11.1773	0.841435		11.1773	0.843485		11.1773	0.852652		11.1773	0.850078		11.1773	0.857786		11.1773	0.855863		11.1773	0.854445		11.1773	0.857404		11.1773	0.857791		11.1773	0.860089		11.1773	0.857073		11.1773	0.85357
11.2519	0.841927		11.2519	0.837553		11.2519	0.835688		11.2519	0.834784		11.2519	0.842023		11.2519	0.844661		11.2519	0.854454		11.2519	0.849835		11.2519	0.859222		11.2519	0.854982		11.2519	0.854584		11.2519	0.856882		11.2519	0.857309		11.2519	0.860013		11.2519	0.85723		11.2519	0.85275
11.3264	0.840216		11.3264	0.837783		11.3264	0.836598		11.3264	0.836176		11.3264	0.841931		11.3264	0.843835		11.3264	0.853464		11.3264	0.849761		11.3264	0.857934		11.3264	0.855021		11.3264	0.855104		11.3264	0.856324		11.3264	0.858181		11.3264	0.859047		11.3264	0.855755		11.3264	0.852914
11.4009	0.839567		11.4009	0.835128		11.4009	0.835683		11.4009	0.835502		11.4009	0.841574		11.4009	0.844877		11.4009	0.854051		11.4009	0.848995		11.4009	0.856686		11.4009	0.856817		11.4009	0.854815		11.4009	0.858743		11.4009	0.858708		11.4009	0.8581		11.4009	0.856375		11.4009	0.854055
11.4754	0.839278		11.4754	0.837018		11.4754	0.837632		11.4754	0.836264		11.4754	0.840967		11.4754	0.844369		11.4754	0.853749		11.4754	0.848806		11.4754	0.856281		11.4754	0.855713		11.4754	0.853389		11.4754	0.85683		11.4754	0.857479		11.4754	0.860493		11.4754	0.856867		11.4754	0.853618
11.5499	0.839791		11.5499	0.836565		11.5499	0.833991		11.5499	0.834438		11.5499	0.84124		11.5499	0.844607		11.5499	0.852749		11.5499	0.847728		11.5499	0.857515		11.5499	0.854379		11.5499	0.852827		11.5499	0.857757		11.5499	0.857989		11.5499	0.859552		11.5499	0.855073		11.5499	0.854322
11.6244	0.839927		11.6244	0.835359		11.6244	0.835258		11.6244	0.834595		11.6244	0.841727		11.6244	0.843494		11.6244	0.854632		11.6244	0.849078		11.6244	0.856188		11.6244	0.855127		11.6244	0.853703		11.6244	0.856608		11.6244	0.856766		11.6244	0.859912		11.6244	0.855956		11.6244	0.852607
11.6989	0.840098		11.6989	0.834873		11.6989	0.835102		11.6989	0.835576		11.6989	0.840392		11.6989	0.84261		11.6989	0.853061		11.6989	0.848707		11.6989	0.856346		11.6989	0.85376		11.6989	0.853744		11.6989	0.856155		11.6989	0.855927		11.6989	0.858308		11.6989	0.855917		11.6989	0.852074
11.7735	0.839597		11.7735	0.835565		11.7735	0.836129		11.7735	0.833785		11.7735	0.839548		11.7735	0.843149		11.7735	0.852576		11.7735	0.847155		11.7735	0.857362		11.7735	0.854731		11.7735	0.852915		11.7735	0.854769		11.7735	0.85685		11.7735	0.859786		11.7735	0.854749		11.7735	0.853898
11.848	0.838912		11.848	0.835515		11.848	0.834018		11.848	0.835016		11.848	0.839905		11.848	0.842134		11.848	0.851415		11.848	0.847608		11.848	0.855778		11.848	0.855328		11.848	0.852235		11.848	0.85625		11.848	0.855327		11.848	0.859022		11.848	0.854648		11.848	0.853188
11.9225	0.83857		11.9225	0.836466		11.9225	0.834901		11.9225	0.834862		11.9225	0.84149		11.9225	0.842938		11.9225	0.852006		11.9225	0.847563		11.9225	0.85599		11.9225	0.853096		11.9225	0.852528		11.9225	0.857726		11.9225	0.854863		11.9225	0.858409		11.9225	0.855894		11.9225	0.853891
11.997	0.840051		11.997	0.83447		11.997	0.832823		11.997	0.834749		11.997	0.840345		11.997	0.842619		11.997	0.851054		11.997	0.847514		11.997	0.856198		11.997	0.854463		11.997	0.853404		11.997	0.856392		11.997	0.856341		11.997	0.858081		11.997	0.854676		11.997	0.853734
12.0715	0.839744		12.0715	0.834787		12.0715	0.834588		12.0715	0.834578		12.0715	0.839627		12.0715	0.841919		12.0715	0.850947		12.0715	0.845949		12.0715	0.856415		12.0715	0.854619		12.0715	0.852436		12.0715	0.856113		12.0715	0.855384		12.0715	0.857001		12.0715	0.855671		12.0715	0.851575
12.146	0.83936		12.146	0.835054		12.146	0.836788		12.146	0.834722		12.146	0.83952		12.146	0.841475		12.146	0.852964		12.146	0.847905		12.146	0.856237		12.146	0.855428		12.146	0.852822		12.146	0.855907		12.146	0.855627		12.146	0.858125		12.146	0.85528		12.146	0.85247
12.2206	0.839785		12.2206	0.834132		12.2206	0.834705		12.2206	0.834749		12.2206	0.838964		12.2206	0.843153		12.2206	0.851673		12.2206	0.847423		12.2206	0.856311		12.2206	0.85434		12.2206	0.852111		12.2206	0.85645		12.2206	0.855927		12.2206	0.858226		12.2206	0.853347		12.2206	0.851746
12.2951	0.839183		12.2951	0.834758		12.2951	0.833298		12.2951	0.833908		12.2951	0.839664		12.2951	0.840976		12.2951	0.852033		12.2951	0.847608		12.2951	0.854535		12.2951	0.854402		12.2951	0.852394		12.2951	0.855723		12.2951	0.85599		12.2951	0.858681		12.2951	0.854894		12.2951	0.851001
12.3696	0.837767		12.3696	0.834462		12.3696	0.833549		12.3696	0.834184		12.3696	0.83953		12.3696	0.840626		12.3696	0.852862		12.3696	0.847744		12.3696	0.8545		12.3696	0.853671		12.3696	0.850622		12.3696	0.855907		12.3696	0.855067		12.3696	0.857159		12.3696	0.854542		12.3696	0.850304
12.4441	0.838564		12.4441	0.833219		12.4441	0.833393		12.4441	0.833741		12.4441	0.838375		12.4441	0.841865		12.4441	0.851619		12.4441	0.846542		12.4441	0.855522		12.4441	0.854201		12.4441	0.852673		12.4441	0.856197		12.4441	0.856879		12.4441	0.856603		12.4441	0.855643		12.4441	0.851274
12.5186	0.838788		12.5186	0.834207		12.5186	0.834024		12.5186	0.834819		12.5186	0.837768		12.5186	0.841537		12.5186	0.851909		12.5186	0.845624		12.5186	0.856153		12.5186	0.852627		12.5186	0.852039		12.5186	0.855475		12.5186	0.855021		12.5186	0.856193		12.5186	0.854872		12.5186	0.851131
12.5931	0.838027		12.5931	0.83412		12.5931	0.832946		12.5931	0.833623		12.5931	0.83971		12.5931	0.840932		12.5931	0.849935		12.5931	0.847538		12.5931	0.855531		12.5931	0.85439		12.5931	0.850607		12.5931	0.853736		12.5931	0.855446		12.5931	0.856237		12.5931	0.853643		12.5931	0.851001
12.6677	0.838092		12.6677	0.833968		12.6677	0.833343		12.6677	0.8328		12.6677	0.839196		12.6677	0.841241		12.6677	0.851463		12.6677	0.846592		12.6677	0.853982		12.6677	0.851936		12.6677	0.852621		12.6677	0.855306		12.6677	0.855129		12.6677	0.857014		12.6677	0.855313		12.6677	0.851438
12.7422	0.839006		12.7422	0.834272		12.7422	0.832667		12.7422	0.833514		12.7422	0.837471		12.7422	0.840285		12.7422	0.850947		12.7422	0.846501		12.7422	0.853765		12.7422	0.852895		12.7422	0.85104		12.7422	0.855496		12.7422	0.856052		12.7422	0.855233		12.7422	0.853598		12.7422	0.850598
12.8167	0.838487		12.8167	0.833112		12.8167	0.835007		12.8167	0.832498		12.8167	0.837944		12.8167	0.840766		12.8167	0.851689		12.8167	0.84662		12.8167	0.853222		12.8167	0.852348		12.8167	0.850803		12.8167	0.855739		12.8167	0.854155		12.8167	0.857083		12.8167	0.853274		12.8167	0.848849
12.8912	0.838676		12.8912	0.833696		12.8912	0.831567		12.8912	0.832944		12.8912	0.838389		12.8912	0.841537		12.8912	0.853287		12.8912	0.845476		12.8912	0.85341		12.8912	0.852181		12.8912	0.852214		12.8912	0.853947		12.8912	0.853951		12.8912	0.855928		12.8912	0.853687		12.8912	0.850946
12.9657	0.837667		12.9657	0.832285		12.9657	0.831757		12.9657	0.832274		12.9657	0.837786		12.9657	0.841129		12.9657	0.851587		12.9657	0.844394		12.9657	0.854816		12.9657	0.852795		12.9657	0.852183		12.9657	0.854711		12.9657	0.853243		12.9657	0.856212		12.9657	0.852833		12.9657	0.850304
13.0402	0.83703		13.0402	0.833462		13.0402	0.831768		13.0402	0.832086		13.0402	0.837244		13.0402	0.840644		13.0402	0.850882		13.0402	0.844797		13.0402	0.855295		13.0402	0.853241		13.0402	0.851539		13.0402	0.856202		13.0402	0.854075		13.0402	0.856187		13.0402	0.854168		13.0402	0.852258
13.1147	0.838269		13.1147	0.832466		13.1147	0.832209		13.1147	0.831355		13.1147	0.838579		13.1147	0.840371		13.1147	0.848434		13.1147	0.846143		13.1147	0.852596		13.1147	0.853146		13.1147	0.851194		13.1147	0.855227		13.1147	0.853645		13.1147	0.855732		13.1147	0.852626		13.1147	0.849587
13.1893	0.836629		13.1893	0.832309		13.1893	0.833058		13.1893	0.833531		13.1893	0.837879		13.1893	0.840115		13.1893	0.850177		13.1893	0.845731		13.1893	0.852551		13.1893	0.852901		13.1893	0.85087		13.1893	0.854711		13.1893	0.855265		13.1893	0.856755		13.1893	0.852872		13.1893	0.849812
13.2638	0.836434		13.2638	0.832927		13.2638	0.832265		13.2638	0.833133		13.2638	0.836924		13.2638	0.839841		13.2638	0.850979		13.2638	0.844398		13.2638	0.853153		13.2638	0.851433		13.2638	0.850494		13.2638	0.854969		13.2638	0.853345		13.2638	0.855157		13.2638	0.852916		13.2638	0.850243
13.3383	0.836971		13.3383	0.832239		13.3383	0.832449		13.3383	0.83121		13.3383	0.837532		13.3383	0.839433		13.3383	0.851043		13.3383	0.84478		13.3383	0.852679		13.3383	0.85145		13.3383	0.850643		13.3383	0.852919		13.3383	0.853436		13.3383	0.857797		13.3383	0.851179		13.3383	0.84945
13.4128	0.836723		13.4128	0.83277		13.4128	0.832265		13.4128	0.83202		13.4128	0.839237		13.4128	0.84051		13.4128	0.850301		13.4128	0.845649		13.4128	0.852374		13.4128	0.851874		13.4128	0.849582		13.4128	0.853757		13.4128	0.853396		13.4128	0.856989		13.4128	0.851129		13.4128	0.850454
13.4873	0.838239		13.4873	0.832392		13.4873	0.833237		13.4873	0.83167		13.4873	0.837165		13.4873	0.839931		13.4873	0.850403		13.4873	0.845209		13.4873	0.8538		13.4873	0.85145		13.4873	0.850231		13.4873	0.855254		13.4873	0.853787		13.4873	0.855562		13.4873	0.852559		13.4873	0.850352
13.5618	0.83628		13.5618	0.83249		13.5618	0.830578		13.5618	0.831473		13.5618	0.837532		13.5618	0.840245		13.5618	0.850812		13.5618	0.844324		13.5618	0.852966		13.5618	0.852666		13.5618	0.850133		13.5618	0.854142		13.5618	0.854993		13.5618	0.855631		13.5618	0.853872		13.5618	0.850762
13.6364	0.836699		13.6364	0.832235		13.6364	0.833678		13.6364	0.832126		13.6364	0.837087		13.6364	0.83924		13.6364	0.850484		13.6364	0.844414		13.6364	0.853607		13.6364	0.850663		13.6364	0.848958		13.6364	0.853757		13.6364	0.853702		13.6364	0.855947		13.6364	0.852671		13.6364	0.850516
13.7109	0.83582		13.7109	0.833507		13.7109	0.831148		13.7109	0.832042		13.7109	0.837151		13.7109	0.839168		13.7109	0.850408		13.7109	0.845719		13.7109	0.853089		13.7109	0.852516		13.7109	0.850262		13.7109	0.853467		13.7109	0.85369		13.7109	0.855802		13.7109	0.852732		13.7109	0.851944
13.7854	0.836552		13.7854	0.833182		13.7854	0.831053		13.7854	0.831688		13.7854	0.837022		13.7854	0.839751		13.7854	0.84972		13.7854	0.843669		13.7854	0.851915		13.7854	0.851339		13.7854	0.849123		13.7854	0.853483		13.7854	0.853673		13.7854	0.854962		13.7854	0.852285		13.7854	0.850379
13.8599	0.836458		13.8599	0.832001		13.8599	0.831394		13.8599	0.829984		13.8599	0.83698		13.8599	0.839145		13.8599	0.849494		13.8599	0.844743		13.8599	0.852408		13.8599	0.851606		13.8599	0.849386		13.8599	0.853883		13.8599	0.852382		13.8599	0.854646		13.8599	0.851341		13.8599	0.851261
13.9344	0.833442		13.9344	0.83298		13.9344	0.831572		13.9344	0.830278		13.9344	0.835816		13.9344	0.839222		13.9344	0.849914		13.9344	0.843517		13.9344	0.853513		13.9344	0.850396		13.9344	0.849767		13.9344	0.85304		13.9344	0.852195		13.9344	0.855063		13.9344	0.853358		13.9344	0.847995
14.0089	0.836245		14.0089	0.832132		14.0089	0.830858		14.0089	0.830663		14.0089	0.836414		14.0089	0.838652		14.0089	0.849661		14.0089	0.844163		14.0089	0.85305		14.0089	0.852136		14.0089	0.849587		14.0089	0.85353		14.0089	0.852694		14.0089	0.855498		14.0089	0.851967		14.0089	0.85029
14.0834	0.835319		14.0834	0.831132		14.0834	0.830064		14.0834	0.830777		14.0834	0.836248		14.0834	0.838575		14.0834	0.848585		14.0834	0.844105		14.0834	0.851609		14.0834	0.851154		14.0834	0.850241		14.0834	0.853219		14.0834	0.853911		14.0834	0.853819		14.0834	0.851944		14.0834	0.849655
14.158	0.837643		14.158	0.832811		14.158	0.829556		14.158	0.830427		14.158	0.835696		14.158	0.838656		14.158	0.849494		14.158	0.843797		14.158	0.853666		14.158	0.85159		14.158	0.850241		14.158	0.852703		14.158	0.851827		14.158	0.854918		14.158	0.851833		14.158	0.847475
14.2325	0.835348		14.2325	0.831342		14.2325	0.829121		14.2325	0.830418		14.2325	0.835687		14.2325	0.837157		14.2325	0.847859		14.2325	0.843126		14.2325	0.851421		14.2325	0.851512		14.2325	0.849123		14.2325	0.854532		14.2325	0.852547		14.2325	0.85649		14.2325	0.850173		14.2325	0.849382
14.307	0.834864		14.307	0.83035		14.307	0.829389		14.307	0.82938		14.307	0.835246		14.307	0.838499		14.307	0.848881		14.307	0.843216		14.307	0.855408		14.307	0.849676		14.307	0.8492		14.307	0.854031		14.307	0.853362		14.307	0.854854		14.307	0.850184		14.307	0.848691
14.3815	0.836446		14.3815	0.831309		14.3815	0.829925		14.3815	0.829222		14.3815	0.835167		14.3815	0.838728		14.3815	0.847455		14.3815	0.84376		14.3815	0.852369		14.3815	0.851244		14.3815	0.851287		14.3815	0.854231		14.3815	0.852292		14.3815	0.854153		14.3815	0.851156		14.3815	0.848712
14.456	0.836605		14.456	0.82998		14.456	0.829886		14.456	0.830133		14.456	0.837393		14.456	0.836861		14.456	0.849602		14.456	0.842924		14.456	0.853114		14.456	0.850557		14.456	0.84951		14.456	0.853267		14.456	0.851063		14.456	0.854059		14.456	0.852218		14.456	0.847578
14.5305	0.835077		14.5305	0.831387		14.5305	0.831014		14.5305	0.82984		14.5305	0.835983		14.5305	0.838692		14.5305	0.849295		14.5305	0.843089		14.5305	0.853296		14.5305	0.850228		14.5305	0.848361		14.5305	0.853493		14.5305	0.852456		14.5305	0.856193		14.5305	0.851156		14.5305	0.847612
14.6051	0.835059		14.6051	0.831947		14.6051	0.830534		14.6051	0.830291		14.6051	0.834834		14.6051	0.837507		14.6051	0.848547		14.6051	0.842669		14.6051	0.852901		14.6051	0.850602		14.6051	0.848165		14.6051	0.85285		14.6051	0.851374		14.6051	0.853819		14.6051	0.849978		14.6051	0.847913
14.6796	0.835189		14.6796	0.830968		14.6796	0.828998		14.6796	0.829774		14.6796	0.835835		14.6796	0.839271		14.6796	0.846842		14.6796	0.84355		14.6796	0.85228		14.6796	0.849927		14.6796	0.850777		14.6796	0.855011		14.6796	0.85134		14.6796	0.854052		14.6796	0.850564		14.6796	0.849095
14.7541	0.834487		14.7541	0.830906		14.7541	0.83021		14.7541	0.828982		14.7541	0.836053		14.7541	0.838203		14.7541	0.847127		14.7541	0.843895		14.7541	0.852975		14.7541	0.850351		14.7541	0.848026		14.7541	0.852012		14.7541	0.851221		14.7541	0.85404		14.7541	0.850749		14.7541	0.849593
14.8286	0.835148		14.8286	0.831717		14.8286	0.831092		14.8286	0.829831		14.8286	0.834426		14.8286	0.837601		14.8286	0.848504		14.8286	0.843879		14.8286	0.852995		14.8286	0.851177		14.8286	0.849901		14.8286	0.853709		14.8286	0.852949		14.8286	0.854438		14.8286	0.849748		14.8286	0.84973
14.9031	0.835791		14.9031	0.830906		14.9031	0.829746		14.9031	0.830155		14.9031	0.83628		14.9031	0.838481		14.9031	0.84958		14.9031	0.842599		14.9031	0.851426		14.9031	0.850329		14.9031	0.848407		14.9031	0.853261		14.9031	0.850904		14.9031	0.85481		14.9031	0.851168		14.9031	0.847475
14.9776	0.835667		14.9776	0.830865		14.9776	0.829433		14.9776	0.830124		14.9776	0.835209		14.9776	0.837215		14.9776	0.849026		14.9776	0.843994		14.9776	0.851781		14.9776	0.850128		14.9776	0.848629		14.9776	0.852792		14.9776	0.851657		14.9776	0.853831		14.9776	0.850732		14.9776	0.847837
15.0522	0.835797		15.0522	0.830807		15.0522	0.829177		15.0522	0.829485		15.0522	0.836238		15.0522	0.837817		15.0522	0.848891		15.0522	0.84194		15.0522	0.851288		15.0522	0.852069		15.0522	0.849237		15.0522	0.852618		15.0522	0.852241		15.0522	0.853585		15.0522	0.849748		15.0522	0.848261
15.1267	0.835248		15.1267	0.829799		15.1267	0.830288		15.1267	0.829441		15.1267	0.835348		15.1267	0.837812		15.1267	0.848144		15.1267	0.843117		15.1267	0.850336		15.1267	0.849748		15.1267	0.846156		15.1267	0.852202		15.1267	0.852818		15.1267	0.85421		15.1267	0.849899		15.1267	0.849464
15.2012	0.83595		15.2012	0.83049		15.2012	0.828294		15.2012	0.829573		15.2012	0.83501		15.2012	0.838755		15.2012	0.848666		15.2012	0.841874		15.2012	0.851179		15.2012	0.849051		15.2012	0.847284		15.2012	0.852402		15.2012	0.851867		15.2012	0.852808		15.2012	0.849586		15.2012	0.848193
15.2757	0.834811		15.2757	0.83042		15.2757	0.828601		15.2757	0.828277		15.2757	0.833462		15.2757	0.837691		15.2757	0.848332		15.2757	0.841306		15.2757	0.85229		15.2757	0.851121		15.2757	0.84816		15.2757	0.85138		15.2757	0.85313		15.2757	0.852246		15.2757	0.851151		15.2757	0.847578
15.3502	0.836275		15.3502	0.83133		15.3502	0.828523		15.3502	0.82952		15.3502	0.835371		15.3502	0.837938		15.3502	0.848267		15.3502	0.841109		15.3502	0.85153		15.3502	0.850016		15.3502	0.847027		15.3502	0.851074		15.3502	0.852031		15.3502	0.853636		15.3502	0.849335		15.3502	0.84684
15.4247	0.83418		15.4247	0.829585		15.4247	0.829863		15.4247	0.828968		15.4247	0.833967		15.4247	0.836479		15.4247	0.849112		15.4247	0.841154		15.4247	0.851668		15.4247	0.849241		15.4247	0.848871		15.4247	0.85256		15.4247	0.851006		15.4247	0.852404		15.4247	0.849905		15.4247	0.848466
15.4992	0.835118		15.4992	0.830737		15.4992	0.827931		15.4992	0.828692		15.4992	0.835807		15.4992	0.836376		15.4992	0.847756		15.4992	0.842183		15.4992	0.849862		15.4992	0.848767		15.4992	0.846996		15.4992	0.85246		15.4992	0.850043		15.4992	0.853775		15.4992	0.850905		15.4992	0.848712
15.5738	0.834658		15.5738	0.830671		15.5738	0.82888		15.5738	0.827909		15.5738	0.834546		15.5738	0.838104		15.5738	0.848649		15.5738	0.841236		15.5738	0.850267		15.5738	0.8489		15.5738	0.849881		15.5738	0.85275		15.5738	0.850213		15.5738	0.853017		15.5738	0.850654		15.5738	0.849682
15.6483	0.835478		15.6483	0.828597		15.6483	0.82988		15.6483	0.827782		15.6483	0.834685		15.6483	0.836161		15.6483	0.847563		15.6483	0.841006		15.6483	0.850834		15.6483	0.849581		15.6483	0.846852		15.6483	0.851959		15.6483	0.850763		15.6483	0.853421		15.6483	0.848542		15.6483	0.848329
15.7228	0.834009		15.7228	0.829951		15.7228	0.827283		15.7228	0.827887		15.7228	0.833364		15.7228	0.837063		15.7228	0.84845		15.7228	0.842475		15.7228	0.85037		15.7228	0.848515		15.7228	0.847815		15.7228	0.851026		15.7228	0.850661		15.7228	0.854046		15.7228	0.850207		15.7228	0.847202
15.7973	0.833437		15.7973	0.829836		15.7973	0.82864		15.7973	0.828565		15.7973	0.835056		15.7973	0.836412		15.7973	0.846847		15.7973	0.841693		15.7973	0.850869		15.7973	0.850396		15.7973	0.846171		15.7973	0.851701		15.7973	0.851408		15.7973	0.853812		15.7973	0.851302		15.7973	0.848001
15.8718	0.833702		15.8718	0.82912		15.8718	0.828652		15.8718	0.829148		15.8718	0.834009		15.8718	0.836547		15.8718	0.847703		15.8718	0.841644		15.8718	0.849857		15.8718	0.848794		15.8718	0.847619		15.8718	0.852523		15.8718	0.852031		15.8718	0.852979		15.8718	0.851302		15.8718	0.845808
15.9463	0.832339		15.9463	0.829803		15.9463	0.828132		15.9463	0.82825		15.9463	0.833406		15.9463	0.836179		15.9463	0.847396		15.9463	0.841286		15.9463	0.849892		15.9463	0.84981		15.9463	0.846929		15.9463	0.852418		15.9463	0.849687		15.9463	0.851748		15.9463	0.84938		15.9463	0.848309
16.0209	0.833082		16.0209	0.829223		16.0209	0.828361		16.0209	0.828263		16.0209	0.834838		16.0209	0.835806		16.0209	0.848171		16.0209	0.841693		16.0209	0.848831		16.0209	0.848264		16.0209	0.847866		16.0209	0.851532		16.0209	0.851046		16.0209	0.853389		16.0209	0.850022		16.0209	0.847263
16.0954	0.833985		16.0954	0.828984		16.0954	0.8273		16.0954	0.830103		16.0954	0.834467		16.0954	0.835748		16.0954	0.847708		16.0954	0.841817		16.0954	0.850168		16.0954	0.849659		16.0954	0.847351		16.0954	0.851148		16.0954	0.850479		16.0954	0.853282		16.0954	0.849022		16.0954	0.846143
16.1699	0.834139		16.1699	0.828815		16.1699	0.829439		16.1699	0.828233		16.1699	0.834514		16.1699	0.837969		16.1699	0.847283		16.1699	0.841928		16.1699	0.850745		16.1699	0.849581		16.1699	0.847825		16.1699	0.850304		16.1699	0.850627		16.1699	0.852379		16.1699	0.850553		16.1699	0.846498
16.2444	0.834156		16.2444	0.827638		16.2444	0.828925		16.2444	0.827764		16.2444	0.833916		16.2444	0.837574		16.2444	0.847643		16.2444	0.841685		16.2444	0.849882		16.2444	0.84808		16.2444	0.846965		16.2444	0.8507		16.2444	0.850281		16.2444	0.852764		16.2444	0.849106		16.2444	0.84822
16.3189	0.833053		16.3189	0.829363		16.3189	0.829283		16.3189	0.829139		16.3189	0.833656		16.3189	0.835115		16.3189	0.848176		16.3189	0.84108		16.3189	0.849092		16.3189	0.84909		16.3189	0.845996		16.3189	0.850974		16.3189	0.848899		16.3189	0.854526		16.3189	0.850011		16.3189	0.845671
16.3934	0.833442		16.3934	0.828749		16.3934	0.828836		16.3934	0.827204		16.3934	0.833383		16.3934	0.836663		16.3934	0.847175		16.3934	0.842587		16.3934	0.85073		16.3934	0.848688		16.3934	0.848546		16.3934	0.852855		16.3934	0.850819		16.3934	0.853162		16.3934	0.849458		16.3934	0.848111
16.4679	0.833631		16.4679	0.828869		16.4679	0.829322		16.4679	0.828942		16.4679	0.834467		16.4679	0.835891		16.4679	0.847127		16.4679	0.841101		16.4679	0.84925		16.4679	0.847612		16.4679	0.846434		16.4679	0.85177		16.4679	0.849658		16.4679	0.852455		16.4679	0.849653		16.4679	0.846683
16.5425	0.83313		16.5425	0.828083		16.5425	0.828506		16.5425	0.829704		16.5425	0.833285		16.5425	0.835241		16.5425	0.847035		16.5425	0.84129		16.5425	0.849137		16.5425	0.849888		16.5425	0.845177		16.5425	0.852012		16.5425	0.849647		16.5425	0.851767		16.5425	0.849905		16.5425	0.846888
16.617	0.833578		16.617	0.828358		16.617	0.82754		16.617	0.827909		16.617	0.834194		16.617	0.835959		16.617	0.845717		16.617	0.841726		16.617	0.849087		16.617	0.848175		16.617	0.846764		16.617	0.852645		16.617	0.850661		16.617	0.851015		16.617	0.850419		16.617	0.84753
16.6915	0.833997		16.6915	0.828272		16.6915	0.827641		16.6915	0.829069		16.6915	0.833202		16.6915	0.836304		16.6915	0.847579		16.6915	0.841376		16.6915	0.850143		16.6915	0.848281		16.6915	0.846929		16.6915	0.851891		16.6915	0.850145		16.6915	0.850977		16.6915	0.849112		16.6915	0.847885
16.766	0.83333		16.766	0.828786		16.766	0.827903		16.766	0.828417		16.766	0.833035		16.766	0.836201		16.766	0.847143		16.766	0.84143		16.766	0.851101		16.766	0.847885		16.766	0.847248		16.766	0.850452		16.766	0.84899		16.766	0.852493		16.766	0.84981		16.766	0.846327
16.8405	0.833743		16.8405	0.827144		16.8405	0.826753		16.8405	0.82846		16.8405	0.834338		16.8405	0.83476		16.8405	0.846438		16.8405	0.840689		16.8405	0.848609		16.8405	0.847082		16.8405	0.844925		16.8405	0.849693		16.8405	0.849936		16.8405	0.853137		16.8405	0.848882		16.8405	0.84671
16.915	0.833177		16.915	0.82786		16.915	0.827456		16.915	0.827151		16.915	0.832609		16.915	0.834801		16.915	0.849225		16.915	0.841002		16.915	0.848545		16.915	0.848834		16.915	0.846002		16.915	0.85022		16.915	0.850049		16.915	0.852171		16.915	0.850033		16.915	0.845665
16.9896	0.832782		16.9896	0.828745		16.9896	0.828194		16.9896	0.828841		16.9896	0.832933		16.9896	0.835631		16.9896	0.846347		16.9896	0.840911		16.9896	0.849901		16.9896	0.847321		16.9896	0.845636		16.9896	0.850331		16.9896	0.849964		16.9896	0.853143		16.9896	0.849944		16.9896	0.846901
17.0641	0.833254		17.0641	0.828115		17.0641	0.827803		17.0641	0.825956		17.0641	0.831482		17.0641	0.834464		17.0641	0.845061		17.0641	0.839273		17.0641	0.84816		17.0641	0.846663		17.0641	0.844899		17.0641	0.850578		17.0641	0.850055		17.0641	0.853402		17.0641	0.849167		17.0641	0.846942
17.1386	0.831885		17.1386	0.828552		17.1386	0.827401		17.1386	0.827865		17.1386	0.833322		17.1386	0.835645		17.1386	0.846783		17.1386	0.840434		17.1386	0.848263		17.1386	0.84769		17.1386	0.844966		17.1386	0.850457		17.1386	0.851046		17.1386	0.85255		17.1386	0.848994		17.1386	0.845678
17.2131	0.832616		17.2131	0.828795		17.2131	0.827445		17.2131	0.826345		17.2131	0.832446		17.2131	0.836259		17.2131	0.846395		17.2131	0.841158		17.2131	0.8485		17.2131	0.847199		17.2131	0.847851		17.2131	0.851712		17.2131	0.849975		17.2131	0.851066		17.2131	0.850056		17.2131	0.846211
17.2876	0.833106		17.2876	0.82819		17.2876	0.828529		17.2876	0.828482		17.2876	0.832062		17.2876	0.836228		17.2876	0.847116		17.2876	0.840973		17.2876	0.849053		17.2876	0.848487		17.2876	0.846604		17.2876	0.849719		17.2876	0.849149		17.2876	0.852474		17.2876	0.84924		17.2876	0.847011
17.3621	0.832876		17.3621	0.828733		17.3621	0.827177		17.3621	0.828671		17.3621	0.834593		17.3621	0.834137		17.3621	0.846099		17.3621	0.84059		17.3621	0.849487		17.3621	0.848772		17.3621	0.846068		17.3621	0.850204		17.3621	0.850151		17.3621	0.852076		17.3621	0.848536		17.3621	0.84796
17.4366	0.832846		17.4366	0.827609		17.4366	0.825921		17.4366	0.827913		17.4366	0.832321		17.4366	0.836242		17.4366	0.845137		17.4366	0.841166		17.4366	0.848673		17.4366	0.847918		17.4366	0.845388		17.4366	0.85013		17.4366	0.849166		17.4366	0.851344		17.4366	0.849503		17.4366	0.84714
17.5112	0.83313		17.5112	0.829478		17.5112	0.826881		17.5112	0.827668		17.5112	0.832613		17.5112	0.835443		17.5112	0.846089		17.5112	0.840265		17.5112	0.849798		17.5112	0.849085		17.5112	0.845677		17.5112	0.851659		17.5112	0.84967		17.5112	0.851407		17.5112	0.848167		17.5112	0.846116
17.5857	0.833507		17.5857	0.827967		17.5857	0.828149		17.5857	0.827729		17.5857	0.831783		17.5857	0.83617		17.5857	0.845712		17.5857	0.840668		17.5857	0.850262		17.5857	0.848409		17.5857	0.845929		17.5857	0.85002		17.5857	0.851301		17.5857	0.852265		17.5857	0.850184		17.5857	0.845118
17.6602	0.832811		17.6602	0.829334		17.6602	0.825909		17.6602	0.827966		17.6602	0.832817		17.6602	0.834451		17.6602	0.846503		17.6602	0.841438		17.6602	0.849497		17.6602	0.848086		17.6602	0.846156		17.6602	0.850257		17.6602	0.849403		17.6602	0.851722		17.6602	0.849346		17.6602	0.844571
17.7347	0.832793		17.7347	0.827646		17.7347	0.827054		17.7347	0.827909		17.7347	0.833846		17.7347	0.836273		17.7347	0.845535		17.7347	0.840401		17.7347	0.849146		17.7347	0.84769		17.7347	0.845857		17.7347	0.849356		17.7347	0.85134		17.7347	0.853478		17.7347	0.849134		17.7347	0.84602
17.8092	0.832634		17.8092	0.827971		17.8092	0.828082		17.8092	0.827663		17.8092	0.832692		17.8092	0.835034		17.8092	0.847326		17.8092	0.839417		17.8092	0.848056		17.8092	0.847857		17.8092	0.844745		17.8092	0.851996		17.8092	0.84886		17.8092	0.853061		17.8092	0.850955		17.8092	0.844968
17.8837	0.832628		17.8837	0.828202		17.8837	0.827523		17.8837	0.825308		17.8837	0.83252		17.8837	0.835577		17.8837	0.845137		17.8837	0.839512		17.8837	0.848949		17.8837	0.846546		17.8837	0.845409		17.8837	0.851269		17.8837	0.849998		17.8837	0.85332		17.8837	0.849888		17.8837	0.845022
17.9583	0.830905		17.9583	0.827408		17.9583	0.827361		17.9583	0.82776		17.9583	0.831501		17.9583	0.833683		17.9583	0.846212		17.9583	0.8398		17.9583	0.84816		17.9583	0.847109		17.9583	0.845481		17.9583	0.850736		17.9583	0.850513		17.9583	0.852101		17.9583	0.848614		17.9583	0.845186
18.0328	0.834009		18.0328	0.82805		18.0328	0.828043		18.0328	0.827418		18.0328	0.831218		18.0328	0.835918		18.0328	0.84483		18.0328	0.840763		18.0328	0.849028		18.0328	0.847606		18.0328	0.845332		18.0328	0.849788		18.0328	0.850491		18.0328	0.853194		18.0328	0.849464		18.0328	0.845289
18.1073	0.832026		18.1073	0.827568		18.1073	0.828316		18.1073	0.827107		18.1073	0.832029		18.1073	0.835447		18.1073	0.846363		18.1073	0.840356		18.1073	0.849275		18.1073	0.847684		18.1073	0.8456		18.1073	0.849677		18.1073	0.848475		18.1073	0.851849		18.1073	0.848452		18.1073	0.846197
18.1818	0.831932		18.1818	0.82805		18.1818	0.828797		18.1818	0.828101		18.1818	0.831672		18.1818	0.835371		18.1818	0.846159		18.1818	0.840146		18.1818	0.848505		18.1818	0.846228		18.1818	0.845033		18.1818	0.849751		18.1818	0.849064		18.1818	0.851186		18.1818	0.849866		18.1818	0.846177
18.2563	0.83077		18.2563	0.828774		18.2563	0.827535		18.2563	0.827563		18.2563	0.831658		18.2563	0.835631		18.2563	0.845653		18.2563	0.840528		18.2563	0.848564		18.2563	0.846367		18.2563	0.847295		18.2563	0.851343		18.2563	0.849001		18.2563	0.852638		18.2563	0.849866		18.2563	0.846334
18.3308	0.83182		18.3308	0.826757		18.3308	0.827228		18.3308	0.826332		18.3308	0.831325		18.3308	0.835941		18.3308	0.844394		18.3308	0.840002		18.3308	0.850109		18.3308	0.847907		18.3308	0.845069		18.3308	0.848871		18.3308	0.849505		18.3308	0.850087		18.3308	0.849575		18.3308	0.846929
18.4054	0.830829		18.4054	0.828494		18.4054	0.827278		18.4054	0.826258		18.4054	0.832052		18.4054	0.835609		18.4054	0.847288		18.4054	0.839919		18.4054	0.848584		18.4054	0.849776		18.4054	0.845198		18.4054	0.850673		18.4054	0.849641		18.4054	0.85207		18.4054	0.848435		18.4054	0.844523
18.4799	0.832256		18.4799	0.827646		18.4799	0.828646		18.4799	0.827204		18.4799	0.831343		18.4799	0.835573		18.4799	0.84561		18.4799	0.840084		18.4799	0.848895		18.4799	0.847176		18.4799	0.844987		18.4799	0.849819		18.4799	0.849319		18.4799	0.850529		18.4799	0.848475		18.4799	0.844517
18.5544	0.832669		18.5544	0.826996		18.5544	0.827361		18.5544	0.827401		18.5544	0.830991		18.5544	0.834397		18.5544	0.845341		18.5544	0.838306		18.5544	0.848762		18.5544	0.847277		18.5544	0.846027		18.5544	0.849487		18.5544	0.849018		18.5544	0.852044		18.5544	0.846726		18.5544	0.846635
18.6289	0.830722		18.6289	0.828045		18.6289	0.827021		18.6289	0.827585		18.6289	0.832089		18.6289	0.834787		18.6289	0.84419		18.6289	0.83996		18.6289	0.847632		18.6289	0.84687		18.6289	0.845522		18.6289	0.849266		18.6289	0.850734		18.6289	0.851571		18.6289	0.84881		18.6289	0.845958
18.7034	0.83261		18.7034	0.828338		18.7034	0.827099		18.7034	0.826337		18.7034	0.831714		18.7034	0.834226		18.7034	0.844625		18.7034	0.839977		18.7034	0.848426		18.7034	0.849581		18.7034	0.844688		18.7034	0.850842		18.7034	0.848939		18.7034	0.850996		18.7034	0.848329		18.7034	0.844845
18.7779	0.831318		18.7779	0.827667		18.7779	0.827127		18.7779	0.826302		18.7779	0.832915		18.7779	0.83437		18.7779	0.844835		18.7779	0.839952		18.7779	0.849023		18.7779	0.847478		18.7779	0.84613		18.7779	0.849688		18.7779	0.850644		18.7779	0.851337		18.7779	0.849816		18.7779	0.847482
18.8524	0.833195		18.8524	0.827366		18.8524	0.827607		18.8524	0.826013		18.8524	0.83196		18.8524	0.83582		18.8524	0.845454		18.8524	0.840277		18.8524	0.847829		18.8524	0.849425		18.8524	0.845826		18.8524	0.85129		18.8524	0.848741		18.8524	0.852569		18.8524	0.848274		18.8524	0.846443
18.927	0.832581		18.927	0.828152		18.927	0.826027		18.927	0.828202		18.927	0.830912		18.927	0.833414		18.927	0.843517		18.927	0.840742		18.927	0.8496		18.927	0.846992		18.927	0.844276		18.927	0.850715		18.927	0.849715		18.927	0.852941		18.927	0.848603		18.927	0.846047
19.0015	0.832846		19.0015	0.82714		19.0015	0.826725		19.0015	0.826582		19.0015	0.832011		19.0015	0.833715		19.0015	0.845933		19.0015	0.839269		19.0015	0.850168		19.0015	0.849241		19.0015	0.845321		19.0015	0.84953		19.0015	0.849794		19.0015	0.852145		19.0015	0.849067		19.0015	0.846614
19.076	0.832262		19.076	0.827309		19.076	0.827429		19.076	0.825207		19.076	0.830754		19.076	0.834033		19.076	0.844647		19.076	0.839182		19.076	0.848623		19.076	0.846808		19.076	0.846666		19.076	0.849719		19.076	0.847614		19.076	0.851476		19.076	0.848151		19.076	0.844858
19.1505	0.834487		19.1505	0.827803		19.1505	0.827021		19.1505	0.82712		19.1505	0.831468		19.1505	0.834581		19.1505	0.844362		19.1505	0.839775		19.1505	0.848248		19.1505	0.84808		19.1505	0.845579		19.1505	0.850115		19.1505	0.849856		19.1505	0.850674		19.1505	0.848793		19.1505	0.844756
19.225	0.832121		19.225	0.827836		19.225	0.82673		19.225	0.826573		19.225	0.831338		19.225	0.834392		19.225	0.844835		19.225	0.839602		19.225	0.848752		19.225	0.84817		19.225	0.844142		19.225	0.850278		19.225	0.848577		19.225	0.850226		19.225	0.848441		19.225	0.845999
19.2995	0.83123		19.2995	0.827144		19.2995	0.826853		19.2995	0.826691		19.2995	0.832113		19.2995	0.835016		19.2995	0.844098		19.2995	0.839528		19.2995	0.849013		19.2995	0.847227		19.2995	0.844209		19.2995	0.849361		19.2995	0.850055		19.2995	0.851021		19.2995	0.848469		19.2995	0.845829
19.3741	0.832675		19.3741	0.827156		19.3741	0.827127		19.3741	0.825513		19.3741	0.832572		19.3741	0.834078		19.3741	0.845459		19.3741	0.839952		19.3741	0.848357		19.3741	0.848147		19.3741	0.844317		19.3741	0.850115		19.3741	0.848724		19.3741	0.852537		19.3741	0.850106		19.3741	0.845706
19.4486	0.83297		19.4486	0.827325		19.4486	0.828222		19.4486	0.826008		19.4486	0.83163		19.4486	0.834154		19.4486	0.846223		19.4486	0.839787		19.4486	0.847938		19.4486	0.847249		19.4486	0.844389		19.4486	0.849045		19.4486	0.848769		19.4486	0.851009		19.4486	0.847664		19.4486	0.844332
19.5231	0.833484		19.5231	0.827671		19.5231	0.827328		19.5231	0.825356		19.5231	0.829855		19.5231	0.834433		19.5231	0.845857		19.5231	0.840088		19.5231	0.848801		19.5231	0.847444		19.5231	0.844281		19.5231	0.85148		19.5231	0.849086		19.5231	0.851179		19.5231	0.849		19.5231	0.846061
19.5976	0.830634		19.5976	0.827115		19.5976	0.828439		19.5976	0.826091		19.5976	0.831005		19.5976	0.834105		19.5976	0.843915		19.5976	0.839108		19.5976	0.848431		19.5976	0.848995		19.5976	0.845801		19.5976	0.850441		19.5976	0.848865		19.5976	0.851666		19.5976	0.847212		19.5976	0.846047
19.6721	0.83313		19.6721	0.826922		19.6721	0.8272		19.6721	0.825973		19.6721	0.831176		19.6721	0.834639		19.6721	0.843867		19.6721	0.839438		19.6721	0.849541		19.6721	0.847165		19.6721	0.844487		19.6721	0.850215		19.6721	0.849806		19.6721	0.851331		19.6721	0.84738		19.6721	0.845869
19.7466	0.833118		19.7466	0.825597		19.7466	0.824932		19.7466	0.827747		19.7466	0.830407		19.7466	0.833921		19.7466	0.845024		19.7466	0.839294		19.7466	0.848535		19.7466	0.847249		19.7466	0.843493		19.7466	0.849187		19.7466	0.850655		19.7466	0.851369		19.7466	0.848408		19.7466	0.84535
19.8211	0.832044		19.8211	0.826119		19.8211	0.826931		19.8211	0.825908		19.8211	0.83126		19.8211	0.834128		19.8211	0.845325		19.8211	0.839224		19.8211	0.848012		19.8211	0.848091		19.8211	0.846135		19.8211	0.851164		19.8211	0.847506		19.8211	0.850946		19.8211	0.848737		19.8211	0.845596
19.8957	0.828834		19.8957	0.825741		19.8957	0.826892		19.8957	0.826486		19.8957	0.830968		19.8957	0.835016		19.8957	0.844631		19.8957	0.839018		19.8957	0.848362		19.8957	0.84745		19.8957	0.844873		19.8957	0.85003		19.8957	0.849568		19.8957	0.851407		19.8957	0.847933		19.8957	0.846785
19.9702	0.83179		19.9702	0.827543		19.9702	0.826602		19.9702	0.824992		19.9702	0.830708		19.9702	0.834276		19.9702	0.845642		19.9702	0.838289		19.9702	0.84889		19.9702	0.84745		19.9702	0.84408		19.9702	0.850278		19.9702	0.848803		19.9702	0.850283		19.9702	0.8481		19.9702	0.846402
20.0447	0.831914		20.0447	0.826231		20.0447	0.826032		20.0447	0.826472		20.0447	0.830875		20.0447	0.835299		20.0447	0.844771		20.0447	0.838479		20.0447	0.849077		20.0447	0.845865		20.0447	0.845342		20.0447	0.850341		20.0447	0.84792		20.0447	0.852701		20.0447	0.846307		20.0447	0.844824
20.1192	0.833608		20.1192	0.825786		20.1192	0.826546		20.1192	0.827248		20.1192	0.830198		20.1192	0.83371		20.1192	0.845024		20.1192	0.837762		20.1192	0.849255		20.1192	0.846646		20.1192	0.845332		20.1192	0.850752		20.1192	0.847133		20.1192	0.851205		20.1192	0.848262		20.1192	0.84755
20.1937	0.832109		20.1937	0.826514		20.1937	0.826172		20.1937	0.825759		20.1937	0.83189		20.1937	0.834891		20.1937	0.843496		20.1937	0.839586		20.1937	0.848096		20.1937	0.847042		20.1937	0.844497		20.1937	0.851316		20.1937	0.847586		20.1937	0.851988		20.1937	0.846893		20.1937	0.844496
20.2682	0.832227		20.2682	0.827654		20.2682	0.827775		20.2682	0.826735		20.2682	0.83125		20.2682	0.83402		20.2682	0.844394		20.2682	0.839195		20.2682	0.846171		20.2682	0.849888		20.2682	0.843745		20.2682	0.849182		20.2682	0.850361		20.2682	0.850415		20.2682	0.847106		20.2682	0.845849
20.3428	0.831495		20.3428	0.827761		20.3428	0.827546		20.3428	0.826818		20.3428	0.829619		20.3428	0.835613		20.3428	0.84427		20.3428	0.838335		20.3428	0.847721		20.3428	0.847349		20.3428	0.8434		20.3428	0.848939		20.3428	0.848764		20.3428	0.851205		20.3428	0.848424		20.3428	0.844872
20.4173	0.833041		20.4173	0.827901		20.4173	0.827937		20.4173	0.826503		20.4173	0.832117		20.4173	0.835555		20.4173	0.843765		20.4173	0.839705		20.4173	0.850045		20.4173	0.849263		20.4173	0.844384		20.4173	0.849166		20.4173	0.848854		20.4173	0.850668		20.4173	0.846575		20.4173	0.846327
20.4918	0.832699		20.4918	0.828202		20.4918	0.827959		20.4918	0.82769		20.4918	0.830305		20.4918	0.834361		20.4918	0.845448		20.4918	0.839874		20.4918	0.8485		20.4918	0.84914		20.4918	0.846362		20.4918	0.850162		20.4918	0.848265		20.4918	0.851703		20.4918	0.848598		20.4918	0.846327
20.5663	0.833979		20.5663	0.827296		20.5663	0.827903		20.5663	0.824874		20.5663	0.829864		20.5663	0.83476		20.5663	0.844265		20.5663	0.839154		20.5663	0.846502		20.5663	0.847243		20.5663	0.843009		20.5663	0.849371		20.5663	0.848243		20.5663	0.851192		20.5663	0.848575		20.5663	0.844298
20.6408	0.831696		20.6408	0.826029		20.6408	0.826663		20.6408	0.825912		20.6408	0.829999		20.6408	0.833248		20.6408	0.844324		20.6408	0.837783		20.6408	0.848091		20.6408	0.847539		20.6408	0.844178		20.6408	0.850099		20.6408	0.84771		20.6408	0.851028		20.6408	0.847162		20.6408	0.845617
20.7153	0.833112		20.7153	0.82621		20.7153	0.827764		20.7153	0.82642		20.7153	0.829943		20.7153	0.833957		20.7153	0.844577		20.7153	0.839475		20.7153	0.847878		20.7153	0.848175		20.7153	0.845064		20.7153	0.850726		20.7153	0.849941		20.7153	0.851438		20.7153	0.847167		20.7153	0.844154
20.7899	0.832315		20.7899	0.827436		20.7899	0.826658		20.7899	0.826091		20.7899	0.830022		20.7899	0.834015		20.7899	0.844061		20.7899	0.838063		20.7899	0.847099		20.7899	0.849045		20.7899	0.844642		20.7899	0.850468		20.7899	0.849347		20.7899	0.851224		20.7899	0.847312		20.7899	0.843512
20.8644	0.831914		20.8644	0.826399		20.8644	0.825904		20.8644	0.826915		20.8644	0.831612		20.8644	0.832979		20.8644	0.843802		20.8644	0.839726		20.8644	0.847943		20.8644	0.847796		20.8644	0.843735		20.8644	0.849883		20.8644	0.848141		20.8644	0.84907		20.8644	0.848391		20.8644	0.845179
20.9389	0.833153		20.9389	0.827		20.9389	0.826669		20.9389	0.824331		20.9389	0.831542		20.9389	0.834271		20.9389	0.845981		20.9389	0.839162		20.9389	0.848712		20.9389	0.847171		20.9389	0.844085		20.9389	0.849129		20.9389	0.849789		20.9389	0.850043		20.9389	0.846938		20.9389	0.845268
21.0134	0.837638		21.0134	0.834507		21.0134	0.829774		21.0134	0.834223		21.0134	0.836229		21.0134	0.840106		21.0134	0.85213		21.0134	0.845554		21.0134	0.85601		21.0134	0.853124		21.0134	0.851725		21.0134	0.855491		21.0134	0.855537		21.0134	0.854652		21.0134	0.856073		21.0134	0.852614
21.0879	0.856831		21.0879	0.850764		21.0879	0.849393		21.0879	0.850929		21.0879	0.85485		21.0879	0.858269		21.0879	0.868393		21.0879	0.862612		21.0879	0.872782		21.0879	0.869287		21.0879	0.868225		21.0879	0.87318		21.0879	0.871903		21.0879	0.873211		21.0879	0.871114		21.0879	0.869586
21.1624	0.867505		21.1624	0.861999		21.1624	0.85868		21.1624	0.859441		21.1624	0.862675		21.1624	0.866586		21.1624	0.876538		21.1624	0.869844		21.1624	0.88037		21.1624	0.878527		21.1624	0.875859		21.1624	0.88145		21.1624	0.881372		21.1624	0.882809		21.1624	0.879048		21.1624	0.876699
21.2369	0.875323		21.2369	0.867164		21.2369	0.865002		21.2369	0.864311		21.2369	0.868224		21.2369	0.872469		21.2369	0.88189		21.2369	0.876385		21.2369	0.886899		21.2369	0.887336		21.2369	0.882051		21.2369	0.88768		21.2369	0.887618		21.2369	0.888429		21.2369	0.886641		21.2369	0.886067
21.3115	0.876745		21.3115	0.870292		21.3115	0.871011		21.3115	0.868729		21.3115	0.872678		21.3115	0.876899		21.3115	0.887679		21.3115	0.883069		21.3115	0.890076		21.3115	0.889708		21.3115	0.886203		21.3115	0.892145		21.3115	0.892217		21.3115	0.892116		21.3115	0.891781		21.3115	0.887154
21.386	0.882238		21.386	0.875721		21.386	0.875456		21.386	0.87369		21.386	0.878135		21.386	0.879803		21.386	0.890422		21.386	0.885872		21.386	0.894566		21.386	0.894874		21.386	0.890726		21.386	0.893152		21.386	0.895133		21.386	0.89605		21.386	0.893865		21.386	0.8929
21.4605	0.884073		21.4605	0.879738		21.4605	0.877254		21.4605	0.87637		21.4605	0.881222		21.4605	0.883842		21.4605	0.893462		21.4605	0.888869		21.4605	0.89689		21.4605	0.89532		21.4605	0.894651		21.4605	0.897996		21.4605	0.898174		21.4605	0.898102		21.4605	0.895547		21.4605	0.893741
21.535	0.888723		21.535	0.882026		21.535	0.881599		21.535	0.879834		21.535	0.884156		21.535	0.886167		21.535	0.897018		21.535	0.891783		21.535	0.900122		21.535	0.899522		21.535	0.896073		21.535	0.902102		21.535	0.898508		21.535	0.902156		21.535	0.89986		21.535	0.896392
21.6095	0.890227		21.6095	0.884948		21.6095	0.883331		21.6095	0.882606		21.6095	0.885728		21.6095	0.888824		21.6095	0.899907		21.6095	0.895015		21.6095	0.902589		21.6095	0.902412		21.6095	0.899514		21.6095	0.904215		21.6095	0.904437		21.6095	0.905332		21.6095	0.901609		21.6095	0.902309
21.684	0.894269		21.684	0.886644		21.684	0.888156		21.684	0.885102		21.684	0.887939		21.684	0.890494		21.684	0.902161		21.684	0.897727		21.684	0.905367		21.684	0.905402		21.684	0.901827		21.684	0.906129		21.684	0.905429		21.684	0.906886		21.684	0.903034		21.684	0.901913
21.7586	0.895656		21.7586	0.890743		21.7586	0.888709		21.7586	0.887878		21.7586	0.890813		21.7586	0.896423		21.7586	0.903409		21.7586	0.898941		21.7586	0.90781		21.7586	0.906312		21.7586	0.904212		21.7586	0.908458		21.7586	0.907898		21.7586	0.908913		21.7586	0.905961		21.7586	0.904953

## Sheet: RawData-2
Figure 1 - Figure Supplement 2e - replicate 2
NanoTemper Technologies	NanoTemper Technologies
MO.Affinity Analysis v2.3	MO.Affinity Analysis v2.3
Origin of exported data	Origin of exported data
Project Title:
Comment:
Project File Path:
Analysis-Set Name:	Analysis-Set #1
Exported from:	MST Traces
Exported on:	2023-03-15 10:21:06
Analysis Settings	Analysis Settings
Type of Analysis:	MST
Evaluation strategy:	On Time
Cold Region Start:	-1
Cold Region End:	0
Hot Region Start:	4
Hot Region End:	5
Sample Information	Sample Information		Sample Information	Sample Information		Sample Information	Sample Information		Sample Information	Sample Information		Sample Information	Sample Information		Sample Information	Sample Information		Sample Information	Sample Information		Sample Information	Sample Information		Sample Information	Sample Information		Sample Information	Sample Information		Sample Information	Sample Information		Sample Information	Sample Information		Sample Information	Sample Information		Sample Information	Sample Information		Sample Information	Sample Information
Merge-Set Name:	(#05)		Merge-Set Name:	(#05)		Merge-Set Name:	(#05)		Merge-Set Name:	(#05)		Merge-Set Name:	(#05)		Merge-Set Name:	(#05)		Merge-Set Name:	(#05)		Merge-Set Name:	(#05)		Merge-Set Name:	(#05)		Merge-Set Name:	(#05)		Merge-Set Name:	(#05)		Merge-Set Name:	(#05)		Merge-Set Name:	(#05)		Merge-Set Name:	(#05)		Merge-Set Name:	(#05)
Run Name:	(#05)		Run Name:	(#05)		Run Name:	(#05)		Run Name:	(#05)		Run Name:	(#05)		Run Name:	(#05)		Run Name:	(#05)		Run Name:	(#05)		Run Name:	(#05)		Run Name:	(#05)		Run Name:	(#05)		Run Name:	(#05)		Run Name:	(#05)		Run Name:	(#05)		Run Name:	(#05)
Date of Measurement:	2022-05-27 00:49:01		Date of Measurement:	2022-05-27 00:49:41		Date of Measurement:	2022-05-27 00:50:22		Date of Measurement:	2022-05-27 00:51:02		Date of Measurement:	2022-05-27 00:51:43		Date of Measurement:	2022-05-27 00:52:23		Date of Measurement:	2022-05-27 00:53:04		Date of Measurement:	2022-05-27 00:53:44		Date of Measurement:	2022-05-27 00:54:25		Date of Measurement:	2022-05-27 00:55:05		Date of Measurement:	2022-05-27 00:55:46		Date of Measurement:	2022-05-27 00:57:07		Date of Measurement:	2022-05-27 00:57:47		Date of Measurement:	2022-05-27 00:58:28		Date of Measurement:	2022-05-27 00:59:08
Capillary Type:	Monolith NT.115 Premium Capillary		Capillary Type:	Monolith NT.115 Premium Capillary		Capillary Type:	Monolith NT.115 Premium Capillary		Capillary Type:	Monolith NT.115 Premium Capillary		Capillary Type:	Monolith NT.115 Premium Capillary		Capillary Type:	Monolith NT.115 Premium Capillary		Capillary Type:	Monolith NT.115 Premium Capillary		Capillary Type:	Monolith NT.115 Premium Capillary		Capillary Type:	Monolith NT.115 Premium Capillary		Capillary Type:	Monolith NT.115 Premium Capillary		Capillary Type:	Monolith NT.115 Premium Capillary		Capillary Type:	Monolith NT.115 Premium Capillary		Capillary Type:	Monolith NT.115 Premium Capillary		Capillary Type:	Monolith NT.115 Premium Capillary		Capillary Type:	Monolith NT.115 Premium Capillary
Capillary Position:	1		Capillary Position:	2		Capillary Position:	3		Capillary Position:	4		Capillary Position:	5		Capillary Position:	6		Capillary Position:	7		Capillary Position:	8		Capillary Position:	9		Capillary Position:	10		Capillary Position:	11		Capillary Position:	13		Capillary Position:	14		Capillary Position:	15		Capillary Position:	16
Ligand:	penicillin		Ligand:	penicillin		Ligand:	penicillin		Ligand:	penicillin		Ligand:	penicillin		Ligand:	penicillin		Ligand:	penicillin		Ligand:	penicillin		Ligand:	penicillin		Ligand:	penicillin		Ligand:	penicillin		Ligand:	penicillin		Ligand:	penicillin		Ligand:	penicillin		Ligand:	penicillin
Ligand Concentration:	0.01		Ligand Concentration:	0.005		Ligand Concentration:	0.0025		Ligand Concentration:	0.00125		Ligand Concentration:	0.000625		Ligand Concentration:	0.0003125		Ligand Concentration:	0.00015625		Ligand Concentration:	7.8125e-05		Ligand Concentration:	3.90625e-05		Ligand Concentration:	1.95313e-05		Ligand Concentration:	9.76563e-06		Ligand Concentration:	2.44141e-06		Ligand Concentration:	1.2207e-06		Ligand Concentration:	6.10352e-07		Ligand Concentration:	3.05176e-07
Target:	Pbp2b		Target:	Pbp2b		Target:	Pbp2b		Target:	Pbp2b		Target:	Pbp2b		Target:	Pbp2b		Target:	Pbp2b		Target:	Pbp2b		Target:	Pbp2b		Target:	Pbp2b		Target:	Pbp2b		Target:	Pbp2b		Target:	Pbp2b		Target:	Pbp2b		Target:	Pbp2b
TargetConcentration:	2e-08		TargetConcentration:	2e-08		TargetConcentration:	2e-08		TargetConcentration:	2e-08		TargetConcentration:	2e-08		TargetConcentration:	2e-08		TargetConcentration:	2e-08		TargetConcentration:	2e-08		TargetConcentration:	2e-08		TargetConcentration:	2e-08		TargetConcentration:	2e-08		TargetConcentration:	2e-08		TargetConcentration:	2e-08		TargetConcentration:	2e-08		TargetConcentration:	2e-08
Measurement Settings	Measurement Settings		Measurement Settings	Measurement Settings		Measurement Settings	Measurement Settings		Measurement Settings	Measurement Settings		Measurement Settings	Measurement Settings		Measurement Settings	Measurement Settings		Measurement Settings	Measurement Settings		Measurement Settings	Measurement Settings		Measurement Settings	Measurement Settings		Measurement Settings	Measurement Settings		Measurement Settings	Measurement Settings		Measurement Settings	Measurement Settings		Measurement Settings	Measurement Settings		Measurement Settings	Measurement Settings		Measurement Settings	Measurement Settings
MST-Power:	Medium		MST-Power:	Medium		MST-Power:	Medium		MST-Power:	Medium		MST-Power:	Medium		MST-Power:	Medium		MST-Power:	Medium		MST-Power:	Medium		MST-Power:	Medium		MST-Power:	Medium		MST-Power:	Medium		MST-Power:	Medium		MST-Power:	Medium		MST-Power:	Medium		MST-Power:	Medium
Excitation-Power:	60		Excitation-Power:	60		Excitation-Power:	60		Excitation-Power:	60		Excitation-Power:	60		Excitation-Power:	60		Excitation-Power:	60		Excitation-Power:	60		Excitation-Power:	60		Excitation-Power:	60		Excitation-Power:	60		Excitation-Power:	60		Excitation-Power:	60		Excitation-Power:	60		Excitation-Power:	60
Excitation type:	Nano - RED		Excitation type:	Nano - RED		Excitation type:	Nano - RED		Excitation type:	Nano - RED		Excitation type:	Nano - RED		Excitation type:	Nano - RED		Excitation type:	Nano - RED		Excitation type:	Nano - RED		Excitation type:	Nano - RED		Excitation type:	Nano - RED		Excitation type:	Nano - RED		Excitation type:	Nano - RED		Excitation type:	Nano - RED		Excitation type:	Nano - RED		Excitation type:	Nano - RED
Thermostat Setpoint:	22		Thermostat Setpoint:	22		Thermostat Setpoint:	22		Thermostat Setpoint:	22		Thermostat Setpoint:	22		Thermostat Setpoint:	22		Thermostat Setpoint:	22		Thermostat Setpoint:	22		Thermostat Setpoint:	22		Thermostat Setpoint:	22		Thermostat Setpoint:	22		Thermostat Setpoint:	22		Thermostat Setpoint:	22		Thermostat Setpoint:	22		Thermostat Setpoint:	22
Included	Included		Included	Included		Included	Included		Included	Included		Included	Included		Included	Included		Included	Included		Included	Included		Included	Included		Included	Included		Included	Included		Included	Included		Included	Included		Included	Included		Included	Included
Time [s]	Normalized Fluorescence [-]		Time [s]	Normalized Fluorescence [-]		Time [s]	Normalized Fluorescence [-]		Time [s]	Normalized Fluorescence [-]		Time [s]	Normalized Fluorescence [-]		Time [s]	Normalized Fluorescence [-]		Time [s]	Normalized Fluorescence [-]		Time [s]	Normalized Fluorescence [-]		Time [s]	Normalized Fluorescence [-]		Time [s]	Normalized Fluorescence [-]		Time [s]	Normalized Fluorescence [-]		Time [s]	Normalized Fluorescence [-]		Time [s]	Normalized Fluorescence [-]		Time [s]	Normalized Fluorescence [-]		Time [s]	Normalized Fluorescence [-]
-3.57675	0.99986		-3.57675	0.999852		-3.57675	1.00017		-3.57675	0.999788		-3.57675	0.999695		-3.57675	0.999734		-3.57675	1.00091		-3.57675	1.00023		-3.57675	0.999524		-3.57675	0.999843		-3.57675	1.00017		-3.57675	1.00024		-3.57675	0.999883		-3.57675	0.999693		-3.57675	1.00009
-3.50223	0.999914		-3.50223	0.999614		-3.50223	1.00035		-3.50223	1.0005		-3.50223	0.999725		-3.50223	0.998982		-3.50223	0.999384		-3.50223	1.00105		-3.50223	1.00073		-3.50223	1.00063		-3.50223	0.999667		-3.50223	1.00012		-3.50223	0.999887		-3.50223	0.999362		-3.50223	0.999934
-3.42772	0.999708		-3.42772	0.999367		-3.42772	0.999912		-3.42772	0.999659		-3.42772	1.00005		-3.42772	1.00058		-3.42772	1.00045		-3.42772	0.999825		-3.42772	1.00027		-3.42772	0.999705		-3.42772	0.998569		-3.42772	0.99916		-3.42772	0.999394		-3.42772	0.999354		-3.42772	0.999627
-3.3532	1.00021		-3.3532	0.999359		-3.3532	0.999303		-3.3532	0.999732		-3.3532	0.999951		-3.3532	1.00008		-3.3532	1.00036		-3.3532	0.999388		-3.3532	0.999395		-3.3532	0.999626		-3.3532	1.00034		-3.3532	0.998924		-3.3532	0.99967		-3.3532	0.998347		-3.3532	0.999988
-3.27869	0.999663		-3.27869	1.00043		-3.27869	0.999367		-3.27869	0.999582		-3.27869	0.999981		-3.27869	0.999835		-3.27869	0.999777		-3.27869	0.999949		-3.27869	1.00065		-3.27869	0.999727		-3.27869	0.999711		-3.27869	1.00026		-3.27869	0.999335		-3.27869	1.00091		-3.27869	0.99959
-3.20417	0.999836		-3.20417	0.999943		-3.20417	0.999062		-3.20417	0.999314		-3.20417	0.999378		-3.20417	0.999472		-3.20417	0.998661		-3.20417	0.999742		-3.20417	0.998851		-3.20417	0.999425		-3.20417	1.00068		-3.20417	0.999668		-3.20417	0.999986		-3.20417	1.00024		-3.20417	0.999547
-3.12966	0.999658		-3.12966	0.999501		-3.12966	0.999388		-3.12966	0.999152		-3.12966	0.999364		-3.12966	0.999236		-3.12966	0.999924		-3.12966	1.0005		-3.12966	0.998699		-3.12966	1.00006		-3.12966	1.00095		-3.12966	1.00037		-3.12966	0.999759		-3.12966	1.0008		-3.12966	1.00002
-3.05514	1.00028		-3.05514	1.00006		-3.05514	0.999271		-3.05514	1.00066		-3.05514	0.999541		-3.05514	0.99907		-3.05514	0.999381		-3.05514	0.999836		-3.05514	0.999715		-3.05514	1.00028		-3.05514	0.999908		-3.05514	1.00008		-3.05514	1.00022		-3.05514	0.998592		-3.05514	0.999329
-2.98062	0.999413		-2.98062	0.999904		-2.98062	1.0001		-2.98062	0.99948		-2.98062	0.999961		-2.98062	0.999868		-2.98062	0.99954		-2.98062	0.998681		-2.98062	1.00018		-2.98062	0.998849		-2.98062	0.999862		-2.98062	0.999595		-2.98062	0.999444		-2.98062	0.999129		-2.98062	0.999085
-2.90611	0.999734		-2.90611	0.999768		-2.90611	0.999497		-2.90611	0.999841		-2.90611	0.999656		-2.90611	0.999655		-2.90611	0.999003		-2.90611	0.999292		-2.90611	1.00076		-2.90611	0.998932		-2.90611	0.999632		-2.90611	0.9986		-2.90611	0.999433		-2.90611	0.998805		-2.90611	0.999475
-2.83159	0.99967		-2.83159	0.99935		-2.83159	0.999131		-2.83159	0.99876		-2.83159	0.999441		-2.83159	0.999259		-2.83159	0.999119		-2.83159	0.998986		-2.83159	0.999344		-2.83159	0.999645		-2.83159	0.998729		-2.83159	0.999683		-2.83159	0.99905		-2.83159	0.998757		-2.83159	0.999144
-2.75708	0.999416		-2.75708	0.999521		-2.75708	1.00022		-2.75708	0.998907		-2.75708	0.999724		-2.75708	0.99909		-2.75708	0.998864		-2.75708	0.999616		-2.75708	0.999457		-2.75708	0.999265		-2.75708	0.999178		-2.75708	0.998844		-2.75708	0.999368		-2.75708	0.999213		-2.75708	1.00046
-2.68256	0.999274		-2.68256	0.999134		-2.68256	0.999141		-2.68256	0.999051		-2.68256	0.999259		-2.68256	0.998507		-2.68256	1.00029		-2.68256	0.999405		-2.68256	0.998797		-2.68256	0.999516		-2.68256	0.998832		-2.68256	1.00004		-2.68256	0.999248		-2.68256	1.00001		-2.68256	0.999756
-2.60805	0.998948		-2.60805	0.999108		-2.60805	0.998719		-2.60805	0.999107		-2.60805	0.999769		-2.60805	0.999133		-2.60805	0.9995		-2.60805	0.998931		-2.60805	0.999421		-2.60805	0.999123		-2.60805	0.998878		-2.60805	0.999558		-2.60805	0.999712		-2.60805	1.00044		-2.60805	0.99858
-2.53353	0.999234		-2.53353	0.999121		-2.53353	0.999104		-2.53353	0.999976		-2.53353	0.999026		-2.53353	0.999545		-2.53353	0.999746		-2.53353	0.998998		-2.53353	0.998626		-2.53353	0.999201		-2.53353	0.999419		-2.53353	1.00012		-2.53353	0.998323		-2.53353	0.999187		-2.53353	0.999271
-2.45901	0.999323		-2.45901	0.999392		-2.45901	0.99855		-2.45901	0.998374		-2.45901	0.999128		-2.45901	0.999073		-2.45901	0.998998		-2.45901	0.997906		-2.45901	0.998873		-2.45901	0.999396		-2.45901	0.999844		-2.45901	1.00016		-2.45901	0.999196		-2.45901	0.998677		-2.45901	0.998727
-2.3845	0.998326		-2.3845	0.998803		-2.3845	0.999214		-2.3845	0.999512		-2.3845	0.998805		-2.3845	0.999751		-2.3845	0.998453		-2.3845	0.999354		-2.3845	0.999635		-2.3845	0.998683		-2.3845	0.998815		-2.3845	1.00024		-2.3845	0.999217		-2.3845	0.99896		-2.3845	0.999321
-2.30998	0.999485		-2.30998	0.998754		-2.30998	0.998622		-2.30998	0.999491		-2.30998	1.00006		-2.30998	0.998469		-2.30998	0.998474		-2.30998	0.999118		-2.30998	0.999386		-2.30998	0.998722		-2.30998	0.998497		-2.30998	0.998921		-2.30998	0.999145		-2.30998	0.999153		-2.30998	0.999388
-2.23547	0.999581		-2.23547	0.998854		-2.23547	0.999663		-2.23547	0.99978		-2.23547	0.99977		-2.23547	0.999316		-2.23547	0.99883		-2.23547	0.997904		-2.23547	0.998699		-2.23547	0.998018		-2.23547	0.999284		-2.23547	0.999076		-2.23547	0.998881		-2.23547	0.999874		-2.23547	0.998719
-2.16095	0.998985		-2.16095	0.99858		-2.16095	0.998634		-2.16095	0.997967		-2.16095	0.999342		-2.16095	0.999539		-2.16095	0.999121		-2.16095	0.999789		-2.16095	0.99874		-2.16095	0.99882		-2.16095	0.998346		-2.16095	0.998403		-2.16095	0.998407		-2.16095	0.998916		-2.16095	0.999318
-2.08644	0.998603		-2.08644	0.998394		-2.08644	0.999109		-2.08644	0.998524		-2.08644	0.99861		-2.08644	1.00045		-2.08644	0.999318		-2.08644	0.998843		-2.08644	0.999162		-2.08644	0.998733		-2.08644	0.997785		-2.08644	0.998113		-2.08644	0.999034		-2.08644	0.999125		-2.08644	0.998824
-2.01192	0.998923		-2.01192	0.999747		-2.01192	0.998808		-2.01192	0.998442		-2.01192	0.999277		-2.01192	0.998195		-2.01192	0.999497		-2.01192	0.999194		-2.01192	0.99877		-2.01192	0.99919		-2.01192	0.998287		-2.01192	0.999499		-2.01192	0.997643		-2.01192	0.999615		-2.01192	0.998918
-1.93741	0.998518		-1.93741	0.998663		-1.93741	0.999223		-1.93741	0.998628		-1.93741	0.999059		-1.93741	0.999328		-1.93741	0.998899		-1.93741	0.998462		-1.93741	0.99858		-1.93741	0.998785		-1.93741	0.999864		-1.93741	0.998351		-1.93741	0.999291		-1.93741	0.997903		-1.93741	0.998851
-1.86289	1.00042		-1.86289	0.999342		-1.86289	0.998836		-1.86289	0.998992		-1.86289	0.998949		-1.86289	0.999119		-1.86289	0.998479		-1.86289	0.998062		-1.86289	0.999179		-1.86289	0.998807		-1.86289	0.998326		-1.86289	0.998842		-1.86289	0.998867		-1.86289	0.997351		-1.86289	0.999144
-1.78837	0.999209		-1.78837	0.998764		-1.78837	0.998708		-1.78837	0.998896		-1.78837	0.99838		-1.78837	0.998328		-1.78837	0.999406		-1.78837	0.998128		-1.78837	0.998527		-1.78837	0.998486		-1.78837	0.998815		-1.78837	0.999003		-1.78837	0.998484		-1.78837	0.99845		-1.78837	0.999262
-1.71386	0.998509		-1.71386	0.998615		-1.71386	0.998537		-1.71386	0.997585		-1.71386	0.999002		-1.71386	0.998224		-1.71386	0.998786		-1.71386	0.998225		-1.71386	0.998933		-1.71386	0.999337		-1.71386	0.998317		-1.71386	0.998364		-1.71386	0.99822		-1.71386	0.997994		-1.71386	0.99861
-1.63934	0.998994		-1.63934	0.998365		-1.63934	0.997989		-1.63934	0.999128		-1.63934	0.998418		-1.63934	0.998741		-1.63934	0.998609		-1.63934	0.998605		-1.63934	0.999074		-1.63934	0.998221		-1.63934	0.999034		-1.63934	0.99904		-1.63934	0.998549		-1.63934	0.99897		-1.63934	0.998907
-1.56483	0.998586		-1.56483	0.998218		-1.56483	0.99826		-1.56483	0.998683		-1.56483	0.99773		-1.56483	0.997801		-1.56483	0.998633		-1.56483	0.998526		-1.56483	0.998608		-1.56483	0.998136		-1.56483	0.998605		-1.56483	0.998954		-1.56483	0.998263		-1.56483	0.997863		-1.56483	0.998948
-1.49031	0.998472		-1.49031	0.998247		-1.49031	0.997924		-1.49031	0.997641		-1.49031	0.998202		-1.49031	0.998417		-1.49031	0.998371		-1.49031	0.999009		-1.49031	0.998004		-1.49031	0.999374		-1.49031	0.998771		-1.49031	0.998602		-1.49031	0.998209		-1.49031	0.997867		-1.49031	0.998336
-1.4158	0.998242		-1.4158	0.998704		-1.4158	0.998244		-1.4158	0.998109		-1.4158	0.999036		-1.4158	0.998553		-1.4158	0.997997		-1.4158	0.998956		-1.4158	0.998491		-1.4158	0.998895		-1.4158	0.999321		-1.4158	0.997384		-1.4158	0.997935		-1.4158	0.99812		-1.4158	0.998966
-1.34128	0.998923		-1.34128	0.998183		-1.34128	0.998015		-1.34128	0.998709		-1.34128	0.998801		-1.34128	0.998316		-1.34128	0.998529		-1.34128	0.998012		-1.34128	0.998532		-1.34128	0.998157		-1.34128	0.998824		-1.34128	0.998643		-1.34128	0.997719		-1.34128	0.998988		-1.34128	0.998534
-1.26677	0.998469		-1.26677	0.998361		-1.26677	0.998275		-1.26677	0.99848		-1.26677	0.998801		-1.26677	0.998775		-1.26677	0.998057		-1.26677	0.998915		-1.26677	0.998027		-1.26677	0.998475		-1.26677	0.998646		-1.26677	0.998566		-1.26677	0.997608		-1.26677	0.998924		-1.26677	0.998787
-1.19225	0.997565		-1.19225	0.997809		-1.19225	0.997696		-1.19225	0.998418		-1.19225	0.998124		-1.19225	0.997657		-1.19225	0.998773		-1.19225	0.998517		-1.19225	0.999391		-1.19225	0.998116		-1.19225	0.998732		-1.19225	0.998859		-1.19225	0.997668		-1.19225	0.998616		-1.19225	0.998544
-1.11773	0.997987		-1.11773	0.999363		-1.11773	0.99842		-1.11773	0.998016		-1.11773	0.999139		-1.11773	0.998235		-1.11773	0.998386		-1.11773	0.998228		-1.11773	0.99811		-1.11773	0.998453		-1.11773	0.997494		-1.11773	0.999082		-1.11773	0.997709		-1.11773	0.99813		-1.11773	0.997326
-1.04322	0.998401		-1.04322	0.997622		-1.04322	0.997917		-1.04322	0.998024		-1.04322	0.998127		-1.04322	0.998503		-1.04322	0.997323		-1.04322	0.99817		-1.04322	0.998046		-1.04322	0.99837		-1.04322	0.99936		-1.04322	0.998979		-1.04322	0.998166		-1.04322	0.998192		-1.04322	0.99818
-0.968703	0.99796		-0.968703	0.999196		-0.968703	0.998042		-0.968703	0.997716		-0.968703	0.998395		-0.968703	0.998267		-0.968703	0.998422		-0.968703	0.997925		-0.968703	0.998308		-0.968703	0.997899		-0.968703	0.997888		-0.968703	0.998235		-0.968703	0.998181		-0.968703	0.997417		-0.968703	0.997688
-0.894187	0.99865		-0.894187	0.999		-0.894187	0.997042		-0.894187	0.997757		-0.894187	0.99774		-0.894187	0.997345		-0.894187	0.998696		-0.894187	0.997652		-0.894187	0.998102		-0.894187	0.997945		-0.894187	0.998491		-0.894187	0.998212		-0.894187	0.997723		-0.894187	0.997853		-0.894187	0.997436
-0.819672	0.998049		-0.819672	0.998124		-0.819672	0.997838		-0.819672	0.997862		-0.819672	0.998891		-0.819672	0.997856		-0.819672	0.998908		-0.819672	0.99774		-0.819672	0.998585		-0.819672	0.997751		-0.819672	0.998041		-0.819672	0.999115		-0.819672	0.998234		-0.819672	0.997947		-0.819672	0.998164
-0.745156	0.997512		-0.745156	0.998833		-0.745156	0.997392		-0.745156	0.99779		-0.745156	0.998042		-0.745156	0.997748		-0.745156	0.998332		-0.745156	0.997241		-0.745156	0.997382		-0.745156	0.998254		-0.745156	0.998		-0.745156	0.997478		-0.745156	0.997239		-0.745156	0.998012		-0.745156	0.997849
-0.67064	0.998283		-0.67064	0.9985		-0.67064	0.997912		-0.67064	0.998538		-0.67064	0.997262		-0.67064	0.999188		-0.67064	0.99723		-0.67064	0.997239		-0.67064	0.997807		-0.67064	0.997943		-0.67064	0.997443		-0.67064	0.997909		-0.67064	0.996992		-0.67064	0.998369		-0.67064	0.998472
-0.596125	0.999195		-0.596125	0.998329		-0.596125	0.997619		-0.596125	0.997256		-0.596125	0.99895		-0.596125	0.997472		-0.596125	0.997345		-0.596125	0.998334		-0.596125	0.997675		-0.596125	0.997306		-0.596125	0.997445		-0.596125	0.99926		-0.596125	0.997089		-0.596125	0.997083		-0.596125	0.998508
-0.521609	0.997697		-0.521609	0.998059		-0.521609	0.997939		-0.521609	0.997751		-0.521609	0.99802		-0.521609	0.997323		-0.521609	0.998471		-0.521609	0.997627		-0.521609	0.998037		-0.521609	0.996814		-0.521609	0.998127		-0.521609	0.997416		-0.521609	0.997424		-0.521609	0.996599		-0.521609	0.997349
-0.447094	0.998207		-0.447094	0.997823		-0.447094	0.997385		-0.447094	0.99723		-0.447094	0.997466		-0.447094	0.997856		-0.447094	0.998527		-0.447094	0.99757		-0.447094	0.998246		-0.447094	0.997788		-0.447094	0.998291		-0.447094	0.99748		-0.447094	0.997328		-0.447094	0.997447		-0.447094	0.997624
-0.372578	0.998397		-0.372578	0.997807		-0.372578	0.997571		-0.372578	0.997976		-0.372578	0.998101		-0.372578	0.996882		-0.372578	0.997556		-0.372578	0.999018		-0.372578	0.998275		-0.372578	0.997637		-0.372578	0.998804		-0.372578	0.998306		-0.372578	0.997391		-0.372578	0.996848		-0.372578	0.997825
-0.298063	0.997248		-0.298063	0.997981		-0.298063	0.997549		-0.298063	0.997526		-0.298063	0.998369		-0.298063	0.997009		-0.298063	0.997776		-0.298063	0.997516		-0.298063	0.997986		-0.298063	0.997164		-0.298063	0.996861		-0.298063	0.99744		-0.298063	0.997361		-0.298063	0.995607		-0.298063	0.997929
-0.223547	0.997919		-0.223547	0.996842		-0.223547	0.997758		-0.223547	0.996873		-0.223547	0.998137		-0.223547	0.997292		-0.223547	0.99737		-0.223547	0.99767		-0.223547	0.998239		-0.223547	0.997416		-0.223547	0.997205		-0.223547	0.998145		-0.223547	0.997729		-0.223547	0.997493		-0.223547	0.997911
-0.149031	0.998363		-0.149031	0.996621		-0.149031	0.996849		-0.149031	0.997127		-0.149031	0.997474		-0.149031	0.997182		-0.149031	0.997657		-0.149031	0.997497		-0.149031	0.997765		-0.149031	0.998344		-0.149031	0.997612		-0.149031	0.998572		-0.149031	0.996551		-0.149031	0.997694		-0.149031	0.997664
-0.0745156	0.997849		-0.0745156	0.996611		-0.0745156	0.997097		-0.0745156	0.996939		-0.0745156	0.998523		-0.0745156	0.99766		-0.0745156	0.997685		-0.0745156	0.997193		-0.0745156	0.997785		-0.0745156	0.996913		-0.0745156	0.998175		-0.0745156	0.997828		-0.0745156	0.997095		-0.0745156	0.997015		-0.0745156	0.997817
0	0.996812		0	0.996378		0	0.995537		0	0.996663		0	0.996227		0	0.996459		0	0.996758		0	0.99623		0	0.996116		0	0.996517		0	0.996135		0	0.996964		0	0.99611		0	0.99637		0	0.996398
0.0745156	0.977403		0.0745156	0.977187		0.0745156	0.9769		0.0745156	0.977057		0.0745156	0.977157		0.0745156	0.976849		0.0745156	0.977746		0.0745156	0.97639		0.0745156	0.976739		0.0745156	0.977526		0.0745156	0.9776		0.0745156	0.977044		0.0745156	0.977695		0.0745156	0.977609		0.0745156	0.977643
0.149031	0.967715		0.149031	0.968015		0.149031	0.966766		0.149031	0.966369		0.149031	0.967031		0.149031	0.966447		0.149031	0.968083		0.149031	0.967197		0.149031	0.967381		0.149031	0.967216		0.149031	0.966607		0.149031	0.968784		0.149031	0.967557		0.149031	0.966749		0.149031	0.968474
0.223547	0.960322		0.223547	0.960824		0.223547	0.959365		0.223547	0.960229		0.223547	0.960315		0.223547	0.960434		0.223547	0.960715		0.223547	0.95993		0.223547	0.961072		0.223547	0.961023		0.223547	0.961131		0.223547	0.960926		0.223547	0.960059		0.223547	0.961562		0.223547	0.960925
0.298062	0.956069		0.298062	0.955729		0.298062	0.954948		0.298062	0.956335		0.298062	0.955544		0.298062	0.956068		0.298062	0.957238		0.298062	0.955506		0.298062	0.95628		0.298062	0.955951		0.298062	0.956982		0.298062	0.957515		0.298062	0.956127		0.298062	0.956672		0.298062	0.956049
0.372578	0.951638		0.372578	0.951426		0.372578	0.950671		0.372578	0.951734		0.372578	0.951158		0.372578	0.95124		0.372578	0.952977		0.372578	0.95134		0.372578	0.952294		0.372578	0.953529		0.372578	0.952337		0.372578	0.952844		0.372578	0.952453		0.372578	0.952417		0.372578	0.952244
0.447093	0.94889		0.447093	0.94819		0.447093	0.947135		0.447093	0.947346		0.447093	0.948273		0.447093	0.948022		0.447093	0.948658		0.447093	0.947819		0.447093	0.949294		0.447093	0.949039		0.447093	0.949428		0.447093	0.948883		0.447093	0.948357		0.447093	0.949004		0.447093	0.948417
0.521609	0.944861		0.521609	0.944864		0.521609	0.943865		0.521609	0.945133		0.521609	0.945071		0.521609	0.945141		0.521609	0.9447		0.521609	0.945506		0.521609	0.946246		0.521609	0.945325		0.521609	0.94627		0.521609	0.945909		0.521609	0.946216		0.521609	0.945715		0.521609	0.945377
0.596125	0.942032		0.596125	0.941807		0.596125	0.941083		0.596125	0.940988		0.596125	0.94182		0.596125	0.942138		0.596125	0.942194		0.596125	0.943114		0.596125	0.943672		0.596125	0.942735		0.596125	0.943609		0.596125	0.944339		0.596125	0.944324		0.596125	0.942198		0.596125	0.944013
0.67064	0.939325		0.67064	0.939974		0.67064	0.938255		0.67064	0.939159		0.67064	0.9396		0.67064	0.940405		0.67064	0.940081		0.67064	0.940254		0.67064	0.940989		0.67064	0.939774		0.67064	0.941058		0.67064	0.941279		0.67064	0.939923		0.67064	0.940619		0.67064	0.940776
0.745156	0.937285		0.745156	0.936369		0.745156	0.936238		0.745156	0.93647		0.745156	0.93659		0.745156	0.937568		0.745156	0.937022		0.745156	0.937285		0.745156	0.93813		0.745156	0.936851		0.745156	0.938631		0.745156	0.939302		0.745156	0.938101		0.745156	0.936384		0.745156	0.937928
0.819672	0.934799		0.819672	0.935271		0.819672	0.933742		0.819672	0.934556		0.819672	0.934532		0.819672	0.935303		0.819672	0.935616		0.819672	0.935504		0.819672	0.93679		0.819672	0.935214		0.819672	0.935999		0.819672	0.936043		0.819672	0.935614		0.819672	0.936338		0.819672	0.934755
0.894187	0.931871		0.894187	0.932632		0.894187	0.930905		0.894187	0.932059		0.894187	0.932108		0.894187	0.932219		0.894187	0.93319		0.894187	0.93311		0.894187	0.933739		0.894187	0.932216		0.894187	0.933062		0.894187	0.933962		0.894187	0.933527		0.894187	0.932615		0.894187	0.932222
0.968703	0.930447		0.968703	0.930198		0.968703	0.929394		0.968703	0.929774		0.968703	0.93023		0.968703	0.93002		0.968703	0.931243		0.968703	0.930982		0.968703	0.932043		0.968703	0.931247		0.968703	0.931955		0.968703	0.932161		0.968703	0.93165		0.968703	0.932025		0.968703	0.931549
1.04322	0.928619		1.04322	0.927735		1.04322	0.926717		1.04322	0.92775		1.04322	0.928042		1.04322	0.92922		1.04322	0.92961		1.04322	0.929549		1.04322	0.930016		1.04322	0.929031		1.04322	0.930295		1.04322	0.929468		1.04322	0.929973		1.04322	0.929345		1.04322	0.929556
1.11773	0.926716		1.11773	0.926205		1.11773	0.925845		1.11773	0.925409		1.11773	0.925767		1.11773	0.926779		1.11773	0.927548		1.11773	0.927647		1.11773	0.927773		1.11773	0.927963		1.11773	0.928246		1.11773	0.928121		1.11773	0.928089		1.11773	0.928025		1.11773	0.927686
1.19225	0.924628		1.19225	0.924564		1.19225	0.923801		1.19225	0.923492		1.19225	0.924544		1.19225	0.924557		1.19225	0.926482		1.19225	0.926254		1.19225	0.925801		1.19225	0.925669		1.19225	0.925994		1.19225	0.926255		1.19225	0.926227		1.19225	0.92661		1.19225	0.925338
1.26677	0.921468		1.26677	0.923189		1.26677	0.92174		1.26677	0.921717		1.26677	0.921269		1.26677	0.923476		1.26677	0.92435		1.26677	0.924369		1.26677	0.924677		1.26677	0.923809		1.26677	0.925483		1.26677	0.924477		1.26677	0.924011		1.26677	0.925242		1.26677	0.923635
1.34128	0.920227		1.34128	0.921344		1.34128	0.920231		1.34128	0.920142		1.34128	0.921274		1.34128	0.921367		1.34128	0.922792		1.34128	0.922723		1.34128	0.922314		1.34128	0.922357		1.34128	0.923016		1.34128	0.922554		1.34128	0.92288		1.34128	0.92298		1.34128	0.92211
1.4158	0.919587		1.4158	0.919671		1.4158	0.918394		1.4158	0.918428		1.4158	0.919488		1.4158	0.919737		1.4158	0.921751		1.4158	0.920348		1.4158	0.921014		1.4158	0.920729		1.4158	0.921075		1.4158	0.921057		1.4158	0.921514		1.4158	0.921642		1.4158	0.920661
1.49031	0.917381		1.49031	0.917992		1.49031	0.916954		1.49031	0.916138		1.49031	0.916511		1.49031	0.918031		1.49031	0.918764		1.49031	0.919204		1.49031	0.919723		1.49031	0.919447		1.49031	0.920333		1.49031	0.919258		1.49031	0.91946		1.49031	0.919276		1.49031	0.91835
1.56483	0.915663		1.56483	0.916966		1.56483	0.914895		1.56483	0.915204		1.56483	0.914783		1.56483	0.916601		1.56483	0.918048		1.56483	0.91769		1.56483	0.918027		1.56483	0.917442		1.56483	0.917944		1.56483	0.918319		1.56483	0.918885		1.56483	0.918195		1.56483	0.916836
1.63934	0.914961		1.63934	0.915581		1.63934	0.913996		1.63934	0.913491		1.63934	0.913807		1.63934	0.915336		1.63934	0.916881		1.63934	0.916499		1.63934	0.91594		1.63934	0.915221		1.63934	0.916825		1.63934	0.916464		1.63934	0.916703		1.63934	0.917088		1.63934	0.916077
1.71386	0.913838		1.71386	0.914646		1.71386	0.912345		1.71386	0.912101		1.71386	0.912718		1.71386	0.913463		1.71386	0.915556		1.71386	0.914699		1.71386	0.916031		1.71386	0.915495		1.71386	0.915673		1.71386	0.914553		1.71386	0.915569		1.71386	0.914189		1.71386	0.914429
1.78837	0.912066		1.78837	0.911774		1.78837	0.911024		1.78837	0.911078		1.78837	0.911287		1.78837	0.91304		1.78837	0.913747		1.78837	0.913977		1.78837	0.912567		1.78837	0.913398		1.78837	0.913631		1.78837	0.914163		1.78837	0.913865		1.78837	0.913583		1.78837	0.912766
1.86289	0.911058		1.86289	0.911996		1.86289	0.909616		1.86289	0.909782		1.86289	0.909626		1.86289	0.911214		1.86289	0.912051		1.86289	0.913034		1.86289	0.913045		1.86289	0.912497		1.86289	0.913527		1.86289	0.91175		1.86289	0.912672		1.86289	0.912594		1.86289	0.91158
1.93741	0.909613		1.93741	0.910566		1.93741	0.907293		1.93741	0.908899		1.93741	0.907751		1.93741	0.910317		1.93741	0.909595		1.93741	0.911851		1.93741	0.911221		1.93741	0.910385		1.93741	0.912064		1.93741	0.909943		1.93741	0.91252		1.93741	0.911839		1.93741	0.910573
2.01192	0.908078		2.01192	0.908618		2.01192	0.907823		2.01192	0.906235		2.01192	0.907654		2.01192	0.907806		2.01192	0.910675		2.01192	0.910637		2.01192	0.909881		2.01192	0.90948		2.01192	0.910035		2.01192	0.909494		2.01192	0.910218		2.01192	0.910206		2.01192	0.908959
2.08644	0.90533		2.08644	0.907748		2.08644	0.905324		2.08644	0.905475		2.08644	0.905908		2.08644	0.907497		2.08644	0.908737		2.08644	0.909195		2.08644	0.909131		2.08644	0.90916		2.08644	0.909076		2.08644	0.907721		2.08644	0.908926		2.08644	0.909464		2.08644	0.908603
2.16095	0.905275		2.16095	0.90639		2.16095	0.90443		2.16095	0.903865		2.16095	0.905091		2.16095	0.905812		2.16095	0.906993		2.16095	0.908667		2.16095	0.907374		2.16095	0.907585		2.16095	0.907812		2.16095	0.907254		2.16095	0.908296		2.16095	0.907578		2.16095	0.90732
2.23547	0.903525		2.23547	0.904881		2.23547	0.902969		2.23547	0.903268		2.23547	0.902989		2.23547	0.904345		2.23547	0.905715		2.23547	0.907164		2.23547	0.906111		2.23547	0.906556		2.23547	0.906725		2.23547	0.905531		2.23547	0.90734		2.23547	0.906551		2.23547	0.904915
2.30998	0.902291		2.30998	0.904008		2.30998	0.902226		2.30998	0.902163		2.30998	0.902289		2.30998	0.90334		2.30998	0.90511		2.30998	0.905737		2.30998	0.905526		2.30998	0.905587		2.30998	0.905185		2.30998	0.905544		2.30998	0.905318		2.30998	0.905913		2.30998	0.903972
2.3845	0.901746		2.3845	0.903346		2.3845	0.900789		2.3845	0.900397		2.3845	0.900944		2.3845	0.901917		2.3845	0.904038		2.3845	0.904491		2.3845	0.904054		2.3845	0.905018		2.3845	0.905288		2.3845	0.904061		2.3845	0.905353		2.3845	0.904888		2.3845	0.9025
2.45901	0.900499		2.45901	0.901993		2.45901	0.899172		2.45901	0.899505		2.45901	0.899868		2.45901	0.901501		2.45901	0.901968		2.45901	0.903132		2.45901	0.903128		2.45901	0.903952		2.45901	0.903182		2.45901	0.903582		2.45901	0.903668		2.45901	0.904273		2.45901	0.902597
2.53353	0.900428		2.53353	0.901592		2.53353	0.898647		2.53353	0.897753		2.53353	0.898359		2.53353	0.901406		2.53353	0.901539		2.53353	0.90277		2.53353	0.902046		2.53353	0.902031		2.53353	0.902647		2.53353	0.902147		2.53353	0.902819		2.53353	0.902311		2.53353	0.901108
2.60805	0.898711		2.60805	0.899778		2.60805	0.897509		2.60805	0.89713		2.60805	0.898056		2.60805	0.899206		2.60805	0.901078		2.60805	0.901702		2.60805	0.901285		2.60805	0.901876		2.60805	0.901293		2.60805	0.900614		2.60805	0.901358		2.60805	0.900641		2.60805	0.900135
2.68256	0.897405		2.68256	0.899685		2.68256	0.896647		2.68256	0.896038		2.68256	0.896223		2.68256	0.89764		2.68256	0.899801		2.68256	0.90176		2.68256	0.900222		2.68256	0.899959		2.68256	0.900476		2.68256	0.900668		2.68256	0.900251		2.68256	0.90029		2.68256	0.900033
2.75708	0.896991		2.75708	0.897529		2.75708	0.895988		2.75708	0.894559		2.75708	0.895727		2.75708	0.89785		2.75708	0.89829		2.75708	0.89975		2.75708	0.899091		2.75708	0.899591		2.75708	0.899372		2.75708	0.898772		2.75708	0.899425		2.75708	0.898753		2.75708	0.898269
2.83159	0.895465		2.83159	0.897008		2.83159	0.895497		2.83159	0.894047		2.83159	0.894013		2.83159	0.896351		2.83159	0.898095		2.83159	0.898987		2.83159	0.897658		2.83159	0.897736		2.83159	0.899365		2.83159	0.898047		2.83159	0.898993		2.83159	0.898582		2.83159	0.896358
2.90611	0.894291		2.90611	0.895824		2.90611	0.893927		2.90611	0.893461		2.90611	0.893229		2.90611	0.895229		2.90611	0.895492		2.90611	0.898488		2.90611	0.897206		2.90611	0.896893		2.90611	0.897045		2.90611	0.896896		2.90611	0.897569		2.90611	0.897696		2.90611	0.896536
2.98062	0.893239		2.98062	0.895123		2.98062	0.892358		2.98062	0.891861		2.98062	0.892997		2.98062	0.894198		2.98062	0.895917		2.98062	0.897841		2.98062	0.896753		2.98062	0.895909		2.98062	0.896392		2.98062	0.896847		2.98062	0.896266		2.98062	0.896694		2.98062	0.89516
3.05514	0.8924		3.05514	0.893751		3.05514	0.890872		3.05514	0.891206		3.05514	0.890782		3.05514	0.89331		3.05514	0.894404		3.05514	0.896065		3.05514	0.894719		3.05514	0.896104		3.05514	0.896699		3.05514	0.894805		3.05514	0.895508		3.05514	0.896322		3.05514	0.894066
3.12966	0.891343		3.12966	0.893429		3.12966	0.8908		3.12966	0.889764		3.12966	0.890744		3.12966	0.891906		3.12966	0.894123		3.12966	0.894318		3.12966	0.894487		3.12966	0.893018		3.12966	0.895639		3.12966	0.893649		3.12966	0.895096		3.12966	0.895243		3.12966	0.893663
3.20417	0.890469		3.20417	0.892306		3.20417	0.890196		3.20417	0.889112		3.20417	0.890141		3.20417	0.892434		3.20417	0.89281		3.20417	0.894423		3.20417	0.892499		3.20417	0.893719		3.20417	0.893954		3.20417	0.893034		3.20417	0.893767		3.20417	0.893218		3.20417	0.891761
3.27869	0.88924		3.27869	0.891434		3.27869	0.888538		3.27869	0.888031		3.27869	0.88825		3.27869	0.890816		3.27869	0.892882		3.27869	0.894116		3.27869	0.892767		3.27869	0.892712		3.27869	0.893496		3.27869	0.89331		3.27869	0.893666		3.27869	0.892698		3.27869	0.892455
3.3532	0.889005		3.3532	0.891005		3.3532	0.887859		3.3532	0.887572		3.3532	0.887295		3.3532	0.889336		3.3532	0.890906		3.3532	0.893571		3.3532	0.892106		3.3532	0.892106		3.3532	0.893251		3.3532	0.890617		3.3532	0.892403		3.3532	0.8918		3.3532	0.891187
3.42772	0.888967		3.42772	0.889765		3.42772	0.887407		3.42772	0.885921		3.42772	0.886652		3.42772	0.889085		3.42772	0.890464		3.42772	0.892352		3.42772	0.891427		3.42772	0.890023		3.42772	0.890959		3.42772	0.890484		3.42772	0.892496		3.42772	0.890791		3.42772	0.890415
3.50223	0.886997		3.50223	0.888842		3.50223	0.886351		3.50223	0.886023		3.50223	0.88653		3.50223	0.888161		3.50223	0.889683		3.50223	0.89136		3.50223	0.889364		3.50223	0.890414		3.50223	0.890758		3.50223	0.890831		3.50223	0.890309		3.50223	0.891324		3.50223	0.889822
3.57675	0.886729		3.57675	0.889849		3.57675	0.885609		3.57675	0.884784		3.57675	0.885628		3.57675	0.8875		3.57675	0.888828		3.57675	0.891221		3.57675	0.889292		3.57675	0.889178		3.57675	0.889859		3.57675	0.890445		3.57675	0.889737		3.57675	0.88963		3.57675	0.888508
3.65126	0.885162		3.65126	0.887562		3.65126	0.884758		3.65126	0.884052		3.65126	0.884082		3.65126	0.886851		3.65126	0.888387		3.65126	0.890527		3.65126	0.889418		3.65126	0.888296		3.65126	0.88943		3.65126	0.888177		3.65126	0.889984		3.65126	0.887818		3.65126	0.887289
3.72578	0.884264		3.72578	0.886969		3.72578	0.884377		3.72578	0.882866		3.72578	0.883483		3.72578	0.886861		3.72578	0.88703		3.72578	0.889426		3.72578	0.886989		3.72578	0.888432		3.72578	0.888864		3.72578	0.886489		3.72578	0.887136		3.72578	0.887907		3.72578	0.886881
3.8003	0.884379		3.8003	0.887366		3.8003	0.884344		3.8003	0.881866		3.8003	0.883388		3.8003	0.885462		3.8003	0.885983		3.8003	0.888574		3.8003	0.887808		3.8003	0.885883		3.8003	0.887491		3.8003	0.886305		3.8003	0.887886		3.8003	0.887899		3.8003	0.886451
3.87481	0.882896		3.87481	0.886257		3.87481	0.882919		3.87481	0.881368		3.87481	0.882086		3.87481	0.884634		3.87481	0.886152		3.87481	0.889157		3.87481	0.886575		3.87481	0.886638		3.87481	0.886494		3.87481	0.886523		3.87481	0.88725		3.87481	0.88735		3.87481	0.885593
3.94933	0.881705		3.94933	0.884454		3.94933	0.881457		3.94933	0.880683		3.94933	0.881648		3.94933	0.883884		3.94933	0.885698		3.94933	0.887605		3.94933	0.885456		3.94933	0.886141		3.94933	0.885791		3.94933	0.884964		3.94933	0.886724		3.94933	0.885829		3.94933	0.884199
4.02384	0.881973		4.02384	0.884512		4.02384	0.881308		4.02384	0.879669		4.02384	0.880901		4.02384	0.883727		4.02384	0.884195		4.02384	0.88769		4.02384	0.884643		4.02384	0.885268		4.02384	0.885793		4.02384	0.884064		4.02384	0.885912		4.02384	0.884825		4.02384	0.883841
4.09836	0.881374		4.09836	0.883325		4.09836	0.879362		4.09836	0.879309		4.09836	0.87984		4.09836	0.881776		4.09836	0.883097		4.09836	0.887059		4.09836	0.88384		4.09836	0.883901		4.09836	0.885177		4.09836	0.883465		4.09836	0.884785		4.09836	0.884062		4.09836	0.883019
4.17287	0.880057		4.17287	0.882846		4.17287	0.879466		4.17287	0.878064		4.17287	0.879414		4.17287	0.88065		4.17287	0.883434		4.17287	0.885933		4.17287	0.883499		4.17287	0.883574		4.17287	0.884623		4.17287	0.883472		4.17287	0.884505		4.17287	0.883156		4.17287	0.882941
4.24739	0.878654		4.24739	0.881552		4.24739	0.878826		4.24739	0.877832		4.24739	0.878097		4.24739	0.880659		4.24739	0.882112		4.24739	0.885526		4.24739	0.883116		4.24739	0.882413		4.24739	0.883103		4.24739	0.882146		4.24739	0.883982		4.24739	0.883055		4.24739	0.881583
4.3219	0.879071		4.3219	0.881603		4.3219	0.878543		4.3219	0.876467		4.3219	0.877735		4.3219	0.880714		4.3219	0.880478		4.3219	0.883307		4.3219	0.881843		4.3219	0.881598		4.3219	0.882581		4.3219	0.88125		4.3219	0.88373		4.3219	0.882035		4.3219	0.880835
4.39642	0.878004		4.39642	0.881394		4.39642	0.877867		4.39642	0.87615		4.39642	0.877171		4.39642	0.878685		4.39642	0.881225		4.39642	0.884174		4.39642	0.882315		4.39642	0.881817		4.39642	0.882362		4.39642	0.881634		4.39642	0.882168		4.39642	0.881564		4.39642	0.880033
4.47094	0.87752		4.47094	0.880656		4.47094	0.876671		4.47094	0.875546		4.47094	0.875956		4.47094	0.879215		4.47094	0.880363		4.47094	0.883571		4.47094	0.881294		4.47094	0.880778		4.47094	0.881854		4.47094	0.881096		4.47094	0.881084		4.47094	0.881818		4.47094	0.879431
4.54545	0.876594		4.54545	0.879406		4.54545	0.875869		4.54545	0.875224		4.54545	0.876355		4.54545	0.878292		4.54545	0.879431		4.54545	0.883941		4.54545	0.880215		4.54545	0.87971		4.54545	0.880833		4.54545	0.880069		4.54545	0.881105		4.54545	0.879951		4.54545	0.87904
4.61997	0.876136		4.61997	0.879499		4.61997	0.876282		4.61997	0.874588		4.61997	0.874819		4.61997	0.877268		4.61997	0.879215		4.61997	0.88142		4.61997	0.880174		4.61997	0.879084		4.61997	0.880013		4.61997	0.878926		4.61997	0.880079		4.61997	0.880363		4.61997	0.878041
4.69448	0.874359		4.69448	0.878866		4.69448	0.874789		4.69448	0.873201		4.69448	0.874446		4.69448	0.876298		4.69448	0.878669		4.69448	0.881494		4.69448	0.879345		4.69448	0.878782		4.69448	0.879978		4.69448	0.87799		4.69448	0.879768		4.69448	0.879963		4.69448	0.878359
4.769	0.874601		4.769	0.878287		4.769	0.874422		4.769	0.873839		4.769	0.872847		4.769	0.876143		4.769	0.877647		4.769	0.881411		4.769	0.878463		4.769	0.878778		4.769	0.878949		4.769	0.877748		4.769	0.878727		4.769	0.879152		4.769	0.876653
4.84351	0.873313		4.84351	0.877626		4.84351	0.873372		4.84351	0.872413		4.84351	0.87341		4.84351	0.875587		4.84351	0.87716		4.84351	0.881132		4.84351	0.87783		4.84351	0.877457		4.84351	0.878291		4.84351	0.877401		4.84351	0.878465		4.84351	0.879317		4.84351	0.87669
4.91803	0.873771		4.91803	0.876538		4.91803	0.873457		4.91803	0.872255		4.91803	0.872092		4.91803	0.874625		4.91803	0.875994		4.91803	0.88009		4.91803	0.876517		4.91803	0.876984		4.91803	0.877514		4.91803	0.877017		4.91803	0.878391		4.91803	0.877832		4.91803	0.875675
4.99255	0.872545		4.99255	0.876598		4.99255	0.872819		4.99255	0.87097		4.99255	0.871847		4.99255	0.874652		4.99255	0.87564		4.99255	0.879426		4.99255	0.876364		4.99255	0.877222		4.99255	0.876707		4.99255	0.875732		4.99255	0.877855		4.99255	0.875972		4.99255	0.876414
5.06706	0.872786		5.06706	0.875443		5.06706	0.872094		5.06706	0.870428		5.06706	0.870877		5.06706	0.874276		5.06706	0.876032		5.06706	0.879255		5.06706	0.875218		5.06706	0.876209		5.06706	0.876054		5.06706	0.875432		5.06706	0.876075		5.06706	0.876693		5.06706	0.874791
5.14158	0.871843		5.14158	0.874871		5.14158	0.871409		5.14158	0.869789		5.14158	0.870422		5.14158	0.873246		5.14158	0.874405		5.14158	0.878651		5.14158	0.875469		5.14158	0.87612		5.14158	0.876479		5.14158	0.874673		5.14158	0.877439		5.14158	0.875733		5.14158	0.874165
5.21609	0.871813		5.21609	0.874867		5.21609	0.871035		5.21609	0.869015		5.21609	0.870091		5.21609	0.872491		5.21609	0.874097		5.21609	0.878286		5.21609	0.874624		5.21609	0.874734		5.21609	0.875684		5.21609	0.874006		5.21609	0.875875		5.21609	0.874859		5.21609	0.874285
5.29061	0.870197		5.29061	0.874647		5.29061	0.870703		5.29061	0.868576		5.29061	0.869341		5.29061	0.87236		5.29061	0.873494		5.29061	0.87801		5.29061	0.873605		5.29061	0.874159		5.29061	0.875927		5.29061	0.873451		5.29061	0.875593		5.29061	0.87475		5.29061	0.872805
5.36512	0.869617		5.36512	0.874015		5.36512	0.870389		5.36512	0.86747		5.36512	0.869072		5.36512	0.871537		5.36512	0.87247		5.36512	0.877658		5.36512	0.874091		5.36512	0.873002		5.36512	0.87449		5.36512	0.873614		5.36512	0.874371		5.36512	0.874628		5.36512	0.872865
5.43964	0.868851		5.43964	0.87277		5.43964	0.869636		5.43964	0.8669		5.43964	0.868229		5.43964	0.871584		5.43964	0.872201		5.43964	0.87739		5.43964	0.873369		5.43964	0.873198		5.43964	0.874207		5.43964	0.872614		5.43964	0.874789		5.43964	0.874152		5.43964	0.871542
5.51415	0.868847		5.51415	0.872657		5.51415	0.868486		5.51415	0.866796		5.51415	0.867422		5.51415	0.870763		5.51415	0.872943		5.51415	0.876887		5.51415	0.871903		5.51415	0.872266		5.51415	0.873599		5.51415	0.87195		5.51415	0.872778		5.51415	0.873179		5.51415	0.871043
5.58867	0.867788		5.58867	0.87204		5.58867	0.868094		5.58867	0.866234		5.58867	0.866934		5.58867	0.870145		5.58867	0.872096		5.58867	0.875773		5.58867	0.871918		5.58867	0.872632		5.58867	0.874435		5.58867	0.872224		5.58867	0.87263		5.58867	0.873143		5.58867	0.871868
5.66319	0.868182		5.66319	0.871545		5.66319	0.867618		5.66319	0.865809		5.66319	0.867084		5.66319	0.869598		5.66319	0.871287		5.66319	0.875092		5.66319	0.871545		5.66319	0.871618		5.66319	0.873143		5.66319	0.870476		5.66319	0.872189		5.66319	0.871687		5.66319	0.870664
5.7377	0.867		5.7377	0.871134		5.7377	0.867647		5.7377	0.865334		5.7377	0.866084		5.7377	0.868813		5.7377	0.870625		5.7377	0.875319		5.7377	0.871137		5.7377	0.871468		5.7377	0.871664		5.7377	0.870526		5.7377	0.872063		5.7377	0.87202		5.7377	0.870251
5.81222	0.86708		5.81222	0.870915		5.81222	0.866326		5.81222	0.864966		5.81222	0.864917		5.81222	0.867741		5.81222	0.869959		5.81222	0.874056		5.81222	0.870984		5.81222	0.870463		5.81222	0.871795		5.81222	0.869972		5.81222	0.87169		5.81222	0.872038		5.81222	0.869694
5.88673	0.866332		5.88673	0.870109		5.88673	0.865933		5.88673	0.86468		5.88673	0.864605		5.88673	0.868637		5.88673	0.869412		5.88673	0.87458		5.88673	0.870287		5.88673	0.870688		5.88673	0.870391		5.88673	0.869719		5.88673	0.871132		5.88673	0.871211		5.88673	0.869103
5.96125	0.865929		5.96125	0.869772		5.96125	0.865745		5.96125	0.863694		5.96125	0.864722		5.96125	0.867665		5.96125	0.868968		5.96125	0.87491		5.96125	0.870278		5.96125	0.869336		5.96125	0.870179		5.96125	0.868175		5.96125	0.870639		5.96125	0.871468		5.96125	0.868608
6.03576	0.865639		6.03576	0.869395		6.03576	0.865414		6.03576	0.863082		6.03576	0.863923		6.03576	0.867058		6.03576	0.868042		6.03576	0.873856		6.03576	0.868889		6.03576	0.869603		6.03576	0.870761		6.03576	0.868523		6.03576	0.870176		6.03576	0.870134		6.03576	0.868101
6.11028	0.864		6.11028	0.868959		6.11028	0.864637		6.11028	0.863303		6.11028	0.862942		6.11028	0.866202		6.11028	0.867892		6.11028	0.873588		6.11028	0.868804		6.11028	0.869514		6.11028	0.869456		6.11028	0.868827		6.11028	0.869852		6.11028	0.8692		6.11028	0.868517
6.18479	0.864904		6.18479	0.868336		6.18479	0.864676		6.18479	0.862565		6.18479	0.86369		6.18479	0.865994		6.18479	0.867126		6.18479	0.873754		6.18479	0.868416		6.18479	0.869577		6.18479	0.870516		6.18479	0.867957		6.18479	0.868935		6.18479	0.868581		6.18479	0.867542
6.25931	0.863894		6.25931	0.867632		6.25931	0.864189		6.25931	0.862001		6.25931	0.862783		6.25931	0.865555		6.25931	0.867782		6.25931	0.872942		6.25931	0.868029		6.25931	0.867658		6.25931	0.868498		6.25931	0.866666		6.25931	0.86936		6.25931	0.868488		6.25931	0.866898
6.33383	0.862905		6.33383	0.867547		6.33383	0.86384		6.33383	0.86077		6.33383	0.862213		6.33383	0.865388		6.33383	0.86719		6.33383	0.87257		6.33383	0.866747		6.33383	0.868065		6.33383	0.869374		6.33383	0.867045		6.33383	0.868499		6.33383	0.866853		6.33383	0.866701
6.40834	0.862802		6.40834	0.867737		6.40834	0.863547		6.40834	0.860422		6.40834	0.861612		6.40834	0.865404		6.40834	0.866145		6.40834	0.871852		6.40834	0.865913		6.40834	0.867139		6.40834	0.868139		6.40834	0.865845		6.40834	0.867887		6.40834	0.867448		6.40834	0.866121
6.48286	0.862001		6.48286	0.867235		6.48286	0.862522		6.48286	0.859862		6.48286	0.861082		6.48286	0.863991		6.48286	0.865672		6.48286	0.870949		6.48286	0.866779		6.48286	0.866851		6.48286	0.868459		6.48286	0.865671		6.48286	0.867256		6.48286	0.867205		6.48286	0.865262
6.55737	0.862484		6.55737	0.866445		6.55737	0.861817		6.55737	0.859344		6.55737	0.860968		6.55737	0.863719		6.55737	0.865509		6.55737	0.871341		6.55737	0.865861		6.55737	0.867501		6.55737	0.867378		6.55737	0.86554		6.55737	0.867256		6.55737	0.8666		6.55737	0.864872
6.63189	0.861026		6.63189	0.865697		6.63189	0.863046		6.63189	0.860304		6.63189	0.859956		6.63189	0.863808		6.63189	0.864893		6.63189	0.871156		6.63189	0.864692		6.63189	0.865759		6.63189	0.866621		6.63189	0.865295		6.63189	0.866572		6.63189	0.866901		6.63189	0.864496
6.7064	0.861055		6.7064	0.866215		6.7064	0.861374		6.7064	0.858218		6.7064	0.860282		6.7064	0.862853		6.7064	0.864711		6.7064	0.870666		6.7064	0.864491		6.7064	0.866209		6.7064	0.866064		6.7064	0.864245		6.7064	0.865694		6.7064	0.866439		6.7064	0.864475
6.78092	0.860453		6.78092	0.865246		6.78092	0.860668		6.78092	0.858881		6.78092	0.85938		6.78092	0.863436		6.78092	0.86447		6.78092	0.870598		6.78092	0.864604		6.78092	0.865349		6.78092	0.865716		6.78092	0.864315		6.78092	0.865647		6.78092	0.866228		6.78092	0.864483
6.85544	0.861313		6.85544	0.865026		6.85544	0.860596		6.85544	0.85756		6.85544	0.859344		6.85544	0.862884		6.85544	0.863254		6.85544	0.869645		6.85544	0.865011		6.85544	0.864183		6.85544	0.865181		6.85544	0.864374		6.85544	0.866547		6.85544	0.865575		6.85544	0.863394
6.92995	0.8595		6.92995	0.864573		6.92995	0.860198		6.92995	0.857282		6.92995	0.85874		6.92995	0.862115		6.92995	0.863213		6.92995	0.868729		6.92995	0.863789		6.92995	0.864988		6.92995	0.865417		6.92995	0.86501		6.92995	0.865057		6.92995	0.8647		6.92995	0.86376
7.00447	0.860076		7.00447	0.863864		7.00447	0.859586		7.00447	0.856632		7.00447	0.85792		7.00447	0.862142		7.00447	0.862261		7.00447	0.86887		7.00447	0.863596		7.00447	0.863798		7.00447	0.865634		7.00447	0.863087		7.00447	0.863875		7.00447	0.864147		7.00447	0.86322
7.07898	0.858905		7.07898	0.864095		7.07898	0.859394		7.07898	0.856888		7.07898	0.857592		7.07898	0.861698		7.07898	0.863142		7.07898	0.869339		7.07898	0.863711		7.07898	0.863599		7.07898	0.864787		7.07898	0.863005		7.07898	0.863887		7.07898	0.864217		7.07898	0.862948
7.1535	0.85848		7.1535	0.863233		7.1535	0.858609		7.1535	0.85675		7.1535	0.857629		7.1535	0.86017		7.1535	0.862642		7.1535	0.868468		7.1535	0.863576		7.1535	0.862417		7.1535	0.864223		7.1535	0.862666		7.1535	0.864202		7.1535	0.864097		7.1535	0.862268
7.22801	0.857558		7.22801	0.863339		7.22801	0.858224		7.22801	0.855185		7.22801	0.857752		7.22801	0.860874		7.22801	0.860729		7.22801	0.868796		7.22801	0.862483		7.22801	0.863317		7.22801	0.86329		7.22801	0.861897		7.22801	0.863648		7.22801	0.863117		7.22801	0.86147
7.30253	0.857515		7.30253	0.862038		7.30253	0.858287		7.30253	0.855889		7.30253	0.857399		7.30253	0.859177		7.30253	0.860923		7.30253	0.867784		7.30253	0.861562		7.30253	0.863109		7.30253	0.86372		7.30253	0.861579		7.30253	0.864349		7.30253	0.862733		7.30253	0.862104
7.37704	0.857427		7.37704	0.862573		7.37704	0.858581		7.37704	0.854565		7.37704	0.856676		7.37704	0.859475		7.37704	0.860335		7.37704	0.867509		7.37704	0.862228		7.37704	0.861949		7.37704	0.863542		7.37704	0.861062		7.37704	0.862777		7.37704	0.862638		7.37704	0.861259
7.45156	0.856745		7.45156	0.861809		7.45156	0.857065		7.45156	0.854643		7.45156	0.855851		7.45156	0.859275		7.45156	0.860819		7.45156	0.867313		7.45156	0.861371		7.45156	0.862778		7.45156	0.863437		7.45156	0.861215		7.45156	0.862779		7.45156	0.861339		7.45156	0.861298
7.52608	0.856239		7.52608	0.861564		7.52608	0.856454		7.52608	0.853855		7.52608	0.856397		7.52608	0.858504		7.52608	0.85974		7.52608	0.866423		7.52608	0.861035		7.52608	0.86149		7.52608	0.862077		7.52608	0.860857		7.52608	0.861876		7.52608	0.861501		7.52608	0.861186
7.60059	0.856131		7.60059	0.861607		7.60059	0.856308		7.60059	0.853957		7.60059	0.855447		7.60059	0.858335		7.60059	0.860072		7.60059	0.867633		7.60059	0.860972		7.60059	0.860886		7.60059	0.861575		7.60059	0.860267		7.60059	0.86221		7.60059	0.861108		7.60059	0.860557
7.67511	0.855914		7.67511	0.861807		7.67511	0.856504		7.67511	0.8537		7.67511	0.854993		7.67511	0.857938		7.67511	0.859603		7.67511	0.866883		7.67511	0.860116		7.67511	0.861934		7.67511	0.861873		7.67511	0.859943		7.67511	0.862144		7.67511	0.861666		7.67511	0.859988
7.74962	0.856335		7.74962	0.860811		7.74962	0.856247		7.74962	0.853106		7.74962	0.854705		7.74962	0.858241		7.74962	0.857871		7.74962	0.865452		7.74962	0.860438		7.74962	0.860975		7.74962	0.861375		7.74962	0.859027		7.74962	0.861868		7.74962	0.8608		7.74962	0.859886
7.82414	0.855025		7.82414	0.860323		7.82414	0.856595		7.82414	0.852559		7.82414	0.85372		7.82414	0.857972		7.82414	0.857815		7.82414	0.865984		7.82414	0.858964		7.82414	0.860468		7.82414	0.861663		7.82414	0.859861		7.82414	0.860928		7.82414	0.860459		7.82414	0.85958
7.89865	0.85461		7.89865	0.860173		7.89865	0.855179		7.89865	0.85347		7.89865	0.854117		7.89865	0.857258		7.89865	0.857895		7.89865	0.866282		7.89865	0.858787		7.89865	0.860205		7.89865	0.860665		7.89865	0.85826		7.89865	0.86098		7.89865	0.860682		7.89865	0.858336
7.97317	0.855085		7.97317	0.859849		7.97317	0.855234		7.97317	0.852305		7.97317	0.853376		7.97317	0.856845		7.97317	0.857317		7.97317	0.865575		7.97317	0.859386		7.97317	0.860687		7.97317	0.860745		7.97317	0.858828		7.97317	0.860928		7.97317	0.859828		7.97317	0.859426
8.04768	0.853687		8.04768	0.85966		8.04768	0.854884		8.04768	0.851745		8.04768	0.85292		8.04768	0.856377		8.04768	0.857051		8.04768	0.865824		8.04768	0.858849		8.04768	0.859282		8.04768	0.860328		8.04768	0.858607		8.04768	0.860702		8.04768	0.859605		8.04768	0.857933
8.1222	0.853864		8.1222	0.858667		8.1222	0.853592		8.1222	0.851351		8.1222	0.852884		8.1222	0.856465		8.1222	0.857363		8.1222	0.865526		8.1222	0.858028		8.1222	0.858571		8.1222	0.86127		8.1222	0.857955		8.1222	0.860028		8.1222	0.858359		8.1222	0.85879
8.19672	0.853864		8.19672	0.859194		8.19672	0.854184		8.19672	0.851393		8.19672	0.852687		8.19672	0.85549		8.19672	0.856184		8.19672	0.864934		8.19672	0.858268		8.19672	0.858207		8.19672	0.859662		8.19672	0.85752		8.19672	0.859956		8.19672	0.858707		8.19672	0.858389
8.27123	0.854176		8.27123	0.859011		8.27123	0.853578		8.27123	0.850753		8.27123	0.85258		8.27123	0.855936		8.27123	0.856596		8.27123	0.864291		8.27123	0.857385		8.27123	0.858516		8.27123	0.859294		8.27123	0.857061		8.27123	0.859234		8.27123	0.858414		8.27123	0.858117
8.34575	0.854402		8.34575	0.858818		8.34575	0.853804		8.34575	0.850489		8.34575	0.851597		8.34575	0.855203		8.34575	0.855115		8.34575	0.864255		8.34575	0.856847		8.34575	0.859057		8.34575	0.859517		8.34575	0.857233		8.34575	0.859523		8.34575	0.858818		8.34575	0.857591
8.42026	0.853551		8.42026	0.857904		8.42026	0.853361		8.42026	0.850226		8.42026	0.851857		8.42026	0.855279		8.42026	0.855705		8.42026	0.864958		8.42026	0.85677		8.42026	0.857842		8.42026	0.85899		8.42026	0.856743		8.42026	0.858365		8.42026	0.858185		8.42026	0.856756
8.49478	0.852519		8.49478	0.857662		8.49478	0.852616		8.49478	0.849415		8.49478	0.851771		8.49478	0.85384		8.49478	0.854663		8.49478	0.865298		8.49478	0.855415		8.49478	0.857836		8.49478	0.85877		8.49478	0.856433		8.49478	0.857945		8.49478	0.858082		8.49478	0.855329
8.56929	0.852503		8.56929	0.857265		8.56929	0.853075		8.56929	0.849092		8.56929	0.851309		8.56929	0.853485		8.56929	0.855445		8.56929	0.864461		8.56929	0.85659		8.56929	0.857785		8.56929	0.858113		8.56929	0.856134		8.56929	0.857757		8.56929	0.856889		8.56929	0.855713
8.64381	0.851854		8.64381	0.857507		8.64381	0.852411		8.64381	0.848845		8.64381	0.851084		8.64381	0.854515		8.64381	0.853443		8.64381	0.86378		8.64381	0.856933		8.64381	0.858216		8.64381	0.858026		8.64381	0.855804		8.64381	0.85764		8.64381	0.857642		8.64381	0.855705
8.71833	0.851325		8.71833	0.857065		8.71833	0.852502		8.71833	0.849174		8.71833	0.850523		8.71833	0.853876		8.71833	0.854099		8.71833	0.863973		8.71833	0.856994		8.71833	0.856103		8.71833	0.85716		8.71833	0.85548		8.71833	0.857866		8.71833	0.856716		8.71833	0.855716
8.79284	0.851079		8.79284	0.856706		8.79284	0.851971		8.79284	0.848639		8.79284	0.850756		8.79284	0.85368		8.79284	0.853967		8.79284	0.86395		8.79284	0.85523		8.79284	0.855875		8.79284	0.857239		8.79284	0.856002		8.79284	0.856821		8.79284	0.85665		8.79284	0.855144
8.86736	0.851027		8.86736	0.855865		8.86736	0.852216		8.86736	0.848252		8.86736	0.849973		8.86736	0.853668		8.86736	0.853517		8.86736	0.86307		8.86736	0.856082		8.86736	0.856836		8.86736	0.85679		8.86736	0.854867		8.86736	0.856848		8.86736	0.85704		8.86736	0.855057
8.94187	0.850527		8.94187	0.856388		8.94187	0.851507		8.94187	0.847968		8.94187	0.849767		8.94187	0.852558		8.94187	0.85386		8.94187	0.863104		8.94187	0.855513		8.94187	0.85633		8.94187	0.857199		8.94187	0.855011		8.94187	0.856445		8.94187	0.85629		8.94187	0.854626
9.01639	0.850798		9.01639	0.856265		9.01639	0.850809		9.01639	0.847824		9.01639	0.849606		9.01639	0.852904		9.01639	0.853526		9.01639	0.862806		9.01639	0.855591		9.01639	0.854702		9.01639	0.856551		9.01639	0.854728		9.01639	0.856986		9.01639	0.856873		9.01639	0.853548
9.0909	0.850729		9.0909	0.855995		9.0909	0.850565		9.0909	0.846505		9.0909	0.849586		9.0909	0.853399		9.0909	0.853369		9.0909	0.862764		9.0909	0.85406		9.0909	0.856599		9.0909	0.856597		9.0909	0.854805		9.0909	0.856226		9.0909	0.855975		9.0909	0.854615
9.16542	0.8507		9.16542	0.856009		9.16542	0.850568		9.16542	0.84739		9.16542	0.849343		9.16542	0.852029		9.16542	0.852846		9.16542	0.862555		9.16542	0.854156		9.16542	0.855254		9.16542	0.855942		9.16542	0.854419		9.16542	0.856574		9.16542	0.856553		9.16542	0.854442
9.23993	0.849795		9.23993	0.855128		9.23993	0.85		9.23993	0.846642		9.23993	0.848979		9.23993	0.85189		9.23993	0.852361		9.23993	0.862621		9.23993	0.854701		9.23993	0.854768		9.23993	0.856249		9.23993	0.852701		9.23993	0.854685		9.23993	0.855563		9.23993	0.854429
9.31445	0.85008		9.31445	0.855003		9.31445	0.849863		9.31445	0.846829		9.31445	0.849229		9.31445	0.851386		9.31445	0.853098		9.31445	0.861829		9.31445	0.854335		9.31445	0.854671		9.31445	0.855381		9.31445	0.853595		9.31445	0.856109		9.31445	0.854906		9.31445	0.854364
9.38897	0.849088		9.38897	0.854486		9.38897	0.850215		9.38897	0.846468		9.38897	0.848642		9.38897	0.851114		9.38897	0.851944		9.38897	0.862069		9.38897	0.855179		9.38897	0.85438		9.38897	0.855041		9.38897	0.852914		9.38897	0.855682		9.38897	0.855163		9.38897	0.853612
9.46348	0.848592		9.46348	0.854486		9.46348	0.849239		9.46348	0.845369		9.46348	0.847979		9.46348	0.850582		9.46348	0.851587		9.46348	0.861211		9.46348	0.854305		9.46348	0.854687		9.46348	0.855495		9.46348	0.852399		9.46348	0.854571		9.46348	0.855139		9.46348	0.853271
9.538	0.849242		9.538	0.854207		9.538	0.848689		9.538	0.845542		9.538	0.84725		9.538	0.85045		9.538	0.851506		9.538	0.861294		9.538	0.85296		9.538	0.853306		9.538	0.854794		9.538	0.853194		9.538	0.854829		9.538	0.855336		9.538	0.853496
9.61251	0.848795		9.61251	0.854402		9.61251	0.848773		9.61251	0.8455		9.61251	0.847304		9.61251	0.850644		9.61251	0.851804		9.61251	0.862532		9.61251	0.853527		9.61251	0.854293		9.61251	0.854345		9.61251	0.852909		9.61251	0.854689		9.61251	0.854524		9.61251	0.853478
9.68703	0.848952		9.68703	0.853044		9.68703	0.849155		9.68703	0.845141		9.68703	0.846732		9.68703	0.850183		9.68703	0.850631		9.68703	0.861205		9.68703	0.852254		9.68703	0.853656		9.68703	0.854432		9.68703	0.852275		9.68703	0.855119		9.68703	0.85401		9.68703	0.852879
9.76154	0.847987		9.76154	0.853078		9.76154	0.847924		9.76154	0.844831		9.76154	0.847083		9.76154	0.850154		9.76154	0.851154		9.76154	0.861629		9.76154	0.85233		9.76154	0.853685		9.76154	0.854117		9.76154	0.851681		9.76154	0.853321		9.76154	0.854384		9.76154	0.852162
9.83606	0.848048		9.83606	0.852305		9.83606	0.849086		9.83606	0.845551		9.83606	0.847168		9.83606	0.849661		9.83606	0.850905		9.83606	0.861303		9.83606	0.852304		9.83606	0.85333		9.83606	0.854391		9.83606	0.852318		9.83606	0.853523		9.83606	0.855356		9.83606	0.85217
9.91057	0.847411		9.91057	0.852653		9.91057	0.848036		9.91057	0.845153		9.91057	0.846467		9.91057	0.850288		9.91057	0.851047		9.91057	0.860417		9.91057	0.851252		9.91057	0.852871		9.91057	0.854065		9.91057	0.852157		9.91057	0.853459		9.91057	0.853293		9.91057	0.852318
9.98509	0.847473		9.98509	0.852582		9.98509	0.848344		9.98509	0.844306		9.98509	0.846		9.98509	0.849424		9.98509	0.849798		9.98509	0.86021		9.98509	0.851377		9.98509	0.852542		9.98509	0.853863		9.98509	0.851792		9.98509	0.854151		9.98509	0.853725		9.98509	0.852842
10.0596	0.84679		10.0596	0.852475		10.0596	0.847533		10.0596	0.844698		10.0596	0.846582		10.0596	0.849525		10.0596	0.850891		10.0596	0.860502		10.0596	0.851985		10.0596	0.852381		10.0596	0.854347		10.0596	0.850909		10.0596	0.853869		10.0596	0.853564		10.0596	0.851122
10.1341	0.84714		10.1341	0.852131		10.1341	0.847481		10.1341	0.843796		10.1341	0.846133		10.1341	0.849641		10.1341	0.84925		10.1341	0.860647		10.1341	0.851465		10.1341	0.851676		10.1341	0.853821		10.1341	0.850973		10.1341	0.852511		10.1341	0.853		10.1341	0.851971
10.2086	0.846882		10.2086	0.851609		10.2086	0.847091		10.2086	0.843671		10.2086	0.845855		10.2086	0.848759		10.2086	0.848589		10.2086	0.859716		10.2086	0.85103		10.2086	0.851429		10.2086	0.854065		10.2086	0.851138		10.2086	0.851992		10.2086	0.852566		10.2086	0.852025
10.2832	0.8465		10.2832	0.851278		10.2832	0.84686		10.2832	0.843889		10.2832	0.84543		10.2832	0.849129		10.2832	0.849916		10.2832	0.86041		10.2832	0.851462		10.2832	0.851862		10.2832	0.854082		10.2832	0.850392		10.2832	0.851769		10.2832	0.851985		10.2832	0.850638
10.3577	0.846172		10.3577	0.851904		10.3577	0.845925		10.3577	0.843211		10.3577	0.845321		10.3577	0.848016		10.3577	0.849055		10.3577	0.859652		10.3577	0.850974		10.3577	0.851796		10.3577	0.852697		10.3577	0.850506		10.3577	0.85254		10.3577	0.852186		10.3577	0.851662
10.4322	0.845661		10.4322	0.851767		10.4322	0.845884		10.4322	0.843821		10.4322	0.844806		10.4322	0.84792		10.4322	0.849405		10.4322	0.86004		10.4322	0.850447		10.4322	0.851691		10.4322	0.852101		10.4322	0.850074		10.4322	0.851971		10.4322	0.851949		10.4322	0.849962
10.5067	0.8454		10.5067	0.850817		10.5067	0.845893		10.5067	0.842757		10.5067	0.845655		10.5067	0.847889		10.5067	0.847826		10.5067	0.859362		10.5067	0.849742		10.5067	0.85159		10.5067	0.852925		10.5067	0.849725		10.5067	0.851347		10.5067	0.852158		10.5067	0.85076
10.5812	0.84539		10.5812	0.851565		10.5812	0.846082		10.5812	0.843269		10.5812	0.844855		10.5812	0.848319		10.5812	0.84804		10.5812	0.860163		10.5812	0.851048		10.5812	0.851306		10.5812	0.852399		10.5812	0.849039		10.5812	0.851093		10.5812	0.851346		10.5812	0.850064
10.6557	0.845389		10.6557	0.851313		10.6557	0.844849		10.6557	0.84227		10.6557	0.844237		10.6557	0.847856		10.6557	0.848314		10.6557	0.859243		10.6557	0.85012		10.6557	0.850715		10.6557	0.852158		10.6557	0.849002		10.6557	0.850928		10.6557	0.85121		10.6557	0.849419
10.7302	0.845213		10.7302	0.849895		10.7302	0.846094		10.7302	0.84255		10.7302	0.844857		10.7302	0.847216		10.7302	0.847755		10.7302	0.85981		10.7302	0.850927		10.7302	0.849936		10.7302	0.852292		10.7302	0.848854		10.7302	0.851248		10.7302	0.851577		10.7302	0.850142
10.8048	0.844589		10.8048	0.850615		10.8048	0.845658		10.8048	0.842108		10.8048	0.844778		10.8048	0.846477		10.8048	0.847822		10.8048	0.859053		10.8048	0.85012		10.8048	0.850339		10.8048	0.851663		10.8048	0.848963		10.8048	0.851075		10.8048	0.850945		10.8048	0.850045
10.8793	0.844612		10.8793	0.851125		10.8793	0.845114		10.8793	0.841902		10.8793	0.843633		10.8793	0.847069		10.8793	0.848367		10.8793	0.859963		10.8793	0.84932		10.8793	0.850803		10.8793	0.851694		10.8793	0.848406		10.8793	0.850555		10.8793	0.850356		10.8793	0.849531
10.9538	0.845251		10.9538	0.850158		10.9538	0.844887		10.9538	0.842334		10.9538	0.84433		10.9538	0.84599		10.9538	0.847186		10.9538	0.858917		10.9538	0.849467		10.9538	0.850663		10.9538	0.851801		10.9538	0.848886		10.9538	0.850485		10.9538	0.849639		10.9538	0.849591
11.0283	0.844584		11.0283	0.850336		11.0283	0.844214		11.0283	0.84185		11.0283	0.844049		11.0283	0.84647		11.0283	0.846884		11.0283	0.859021		11.0283	0.84897		11.0283	0.849267		11.0283	0.851768		11.0283	0.848161		11.0283	0.850959		11.0283	0.850567		11.0283	0.848597
11.1028	0.844399		11.1028	0.849677		11.1028	0.844581		11.1028	0.8423		11.1028	0.843862		11.1028	0.846214		11.1028	0.846848		11.1028	0.858566		11.1028	0.849097		11.1028	0.849378		11.1028	0.850844		11.1028	0.847641		11.1028	0.849925		11.1028	0.849904		11.1028	0.84864
11.1773	0.844501		11.1773	0.849636		11.1773	0.844684		11.1773	0.841416		11.1773	0.843788		11.1773	0.845273		11.1773	0.847959		11.1773	0.85831		11.1773	0.849006		11.1773	0.849908		11.1773	0.85151		11.1773	0.849572		11.1773	0.850535		11.1773	0.84953		11.1773	0.848507
11.2519	0.843757		11.2519	0.849521		11.2519	0.844683		11.2519	0.840682		11.2519	0.84291		11.2519	0.846278		11.2519	0.847772		11.2519	0.858681		11.2519	0.847592		11.2519	0.849748		11.2519	0.851205		11.2519	0.848222		11.2519	0.849577		11.2519	0.850191		11.2519	0.848686
11.3264	0.84406		11.3264	0.849221		11.3264	0.8443		11.3264	0.841827		11.3264	0.842855		11.3264	0.845761		11.3264	0.8467		11.3264	0.859071		11.3264	0.848053		11.3264	0.849247		11.3264	0.850682		11.3264	0.847881		11.3264	0.850908		11.3264	0.849828		11.3264	0.849003
11.4009	0.842882		11.4009	0.849927		11.4009	0.845062		11.4009	0.841559		11.4009	0.842749		11.4009	0.845689		11.4009	0.846416		11.4009	0.858012		11.4009	0.848835		11.4009	0.849228		11.4009	0.849849		11.4009	0.847979		11.4009	0.849127		11.4009	0.849221		11.4009	0.848354
11.4754	0.844159		11.4754	0.849177		11.4754	0.843671		11.4754	0.84104		11.4754	0.843489		11.4754	0.845013		11.4754	0.847419		11.4754	0.858926		11.4754	0.848376		11.4754	0.849298		11.4754	0.850776		11.4754	0.847211		11.4754	0.848468		11.4754	0.849309		11.4754	0.848487
11.5499	0.843265		11.5499	0.849068		11.5499	0.844294		11.5499	0.840394		11.5499	0.842805		11.5499	0.844412		11.5499	0.846653		11.5499	0.858419		11.5499	0.847544		11.5499	0.84849		11.5499	0.849974		11.5499	0.847332		11.5499	0.848851		11.5499	0.849424		11.5499	0.847745
11.6244	0.84295		11.6244	0.848269		11.6244	0.844305		11.6244	0.841042		11.6244	0.843084		11.6244	0.845006		11.6244	0.84542		11.6244	0.857633		11.6244	0.847805		11.6244	0.848076		11.6244	0.850103		11.6244	0.847001		11.6244	0.84934		11.6244	0.848259		11.6244	0.848564
11.6989	0.843271		11.6989	0.848416		11.6989	0.844131		11.6989	0.840696		11.6989	0.842833		11.6989	0.844839		11.6989	0.846045		11.6989	0.858057		11.6989	0.848007		11.6989	0.848418		11.6989	0.849529		11.6989	0.846388		11.6989	0.848501		11.6989	0.849177		11.6989	0.847385
11.7735	0.842698		11.7735	0.848519		11.7735	0.84345		11.7735	0.840889		11.7735	0.842177		11.7735	0.844713		11.7735	0.845214		11.7735	0.858076		11.7735	0.847373		11.7735	0.847748		11.7735	0.849658		11.7735	0.847728		11.7735	0.848882		11.7735	0.848102		11.7735	0.848339
11.848	0.843258		11.848	0.847832		11.848	0.842849		11.848	0.840756		11.848	0.841525		11.848	0.844732		11.848	0.845508		11.848	0.858033		11.848	0.847405		11.848	0.848726		11.848	0.84951		11.848	0.846665		11.848	0.848429		11.848	0.847256		11.848	0.847441
11.9225	0.842439		11.9225	0.847894		11.9225	0.843429		11.9225	0.840537		11.9225	0.842714		11.9225	0.843453		11.9225	0.846097		11.9225	0.858792		11.9225	0.848021		11.9225	0.848262		11.9225	0.848741		11.9225	0.846171		11.9225	0.848097		11.9225	0.848532		11.9225	0.847739
11.997	0.842877		11.997	0.848146		11.997	0.842496		11.997	0.840136		11.997	0.841632		11.997	0.844825		11.997	0.844386		11.997	0.858823		11.997	0.846635		11.997	0.848378		11.997	0.849676		11.997	0.845991		11.997	0.847906		11.997	0.849466		11.997	0.847571
12.0715	0.84257		12.0715	0.847738		12.0715	0.84345		12.0715	0.839824		12.0715	0.841736		12.0715	0.844094		12.0715	0.845074		12.0715	0.857982		12.0715	0.847003		12.0715	0.847006		12.0715	0.849052		12.0715	0.845781		12.0715	0.847893		12.0715	0.848126		12.0715	0.846292
12.146	0.84243		12.146	0.847738		12.146	0.842903		12.146	0.839989		12.146	0.842416		12.146	0.843774		12.146	0.844242		12.146	0.857251		12.146	0.846965		12.146	0.847748		12.146	0.848826		12.146	0.846038		12.146	0.8477		12.146	0.848542		12.146	0.847243
12.2206	0.841958		12.2206	0.847454		12.2206	0.8434		12.2206	0.83916		12.2206	0.841928		12.2206	0.844054		12.2206	0.844713		12.2206	0.857117		12.2206	0.847492		12.2206	0.847602		12.2206	0.848903		12.2206	0.846039		12.2206	0.848021		12.2206	0.847919		12.2206	0.846785
12.2951	0.841468		12.2951	0.847617		12.2951	0.842736		12.2951	0.839275		12.2951	0.841582		12.2951	0.843908		12.2951	0.845651		12.2951	0.857443		12.2951	0.845962		12.2951	0.847011		12.2951	0.848837		12.2951	0.846781		12.2951	0.848489		12.2951	0.847736		12.2951	0.847022
12.3696	0.84154		12.3696	0.847294		12.3696	0.842643		12.3696	0.838645		12.3696	0.841461		12.3696	0.843541		12.3696	0.844301		12.3696	0.857124		12.3696	0.845489		12.3696	0.847553		12.3696	0.84867		12.3696	0.845856		12.3696	0.847708		12.3696	0.847264		12.3696	0.846509
12.4441	0.842395		12.4441	0.847304		12.4441	0.841848		12.4441	0.838872		12.4441	0.841433		12.4441	0.843712		12.4441	0.844633		12.4441	0.856676		12.4441	0.845898		12.4441	0.846925		12.4441	0.848911		12.4441	0.845112		12.4441	0.847388		12.4441	0.847782		12.4441	0.847224
12.5186	0.841266		12.5186	0.847058		12.5186	0.841765		12.5186	0.838241		12.5186	0.841318		12.5186	0.843595		12.5186	0.844118		12.5186	0.856725		12.5186	0.845226		12.5186	0.846626		12.5186	0.848493		12.5186	0.845369		12.5186	0.846727		12.5186	0.847298		12.5186	0.846581
12.5931	0.84177		12.5931	0.846565		12.5931	0.84174		12.5931	0.839289		12.5931	0.840988		12.5931	0.842825		12.5931	0.843756		12.5931	0.85735		12.5931	0.846566		12.5931	0.847087		12.5931	0.847726		12.5931	0.844677		12.5931	0.846084		12.5931	0.846778		12.5931	0.847264
12.6677	0.841528		12.6677	0.84672		12.6677	0.84162		12.6677	0.838273		12.6677	0.840489		12.6677	0.843027		12.6677	0.843672		12.6677	0.857036		12.6677	0.84616		12.6677	0.846111		12.6677	0.84811		12.6677	0.845204		12.6677	0.847186		12.6677	0.847676		12.6677	0.847135
12.7422	0.84061		12.7422	0.846491		12.7422	0.841272		12.7422	0.838371		12.7422	0.841116		12.7422	0.842681		12.7422	0.843106		12.7422	0.856727		12.7422	0.844954		12.7422	0.846094		12.7422	0.847696		12.7422	0.844625		12.7422	0.848285		12.7422	0.847411		12.7422	0.846225
12.8167	0.840608		12.8167	0.846545		12.8167	0.841175		12.8167	0.838322		12.8167	0.84031		12.8167	0.843121		12.8167	0.84326		12.8167	0.856476		12.8167	0.846185		12.8167	0.846195		12.8167	0.848815		12.8167	0.844182		12.8167	0.846915		12.8167	0.846961		12.8167	0.846942
12.8912	0.841931		12.8912	0.846855		12.8912	0.841928		12.8912	0.838591		12.8912	0.839852		12.8912	0.842808		12.8912	0.843236		12.8912	0.856071		12.8912	0.844573		12.8912	0.845195		12.8912	0.847134		12.8912	0.844505		12.8912	0.846333		12.8912	0.846459		12.8912	0.84587
12.9657	0.840499		12.9657	0.846607		12.9657	0.841275		12.9657	0.838872		12.9657	0.840186		12.9657	0.84239		12.9657	0.84388		12.9657	0.857079		12.9657	0.844781		12.9657	0.846363		12.9657	0.846399		12.9657	0.844235		12.9657	0.847726		12.9657	0.847067		12.9657	0.846235
13.0402	0.840747		13.0402	0.846862		13.0402	0.840999		13.0402	0.837955		13.0402	0.839857		13.0402	0.842283		13.0402	0.843458		13.0402	0.855703		13.0402	0.844283		13.0402	0.846061		13.0402	0.8486		13.0402	0.844795		13.0402	0.845402		13.0402	0.846561		13.0402	0.845877
13.1147	0.840614		13.1147	0.846473		13.1147	0.840512		13.1147	0.838267		13.1147	0.839504		13.1147	0.842684		13.1147	0.842361		13.1147	0.856391		13.1147	0.844234		13.1147	0.845683		13.1147	0.847555		13.1147	0.844244		13.1147	0.846496		13.1147	0.846185		13.1147	0.846367
13.1893	0.840412		13.1893	0.845856		13.1893	0.840363		13.1893	0.837607		13.1893	0.839302		13.1893	0.842156		13.1893	0.843565		13.1893	0.856939		13.1893	0.845116		13.1893	0.846527		13.1893	0.847524		13.1893	0.843617		13.1893	0.845894		13.1893	0.846784		13.1893	0.845771
13.2638	0.840335		13.2638	0.845241		13.2638	0.840681		13.2638	0.838966		13.2638	0.840138		13.2638	0.84244		13.2638	0.843041		13.2638	0.856395		13.2638	0.844259		13.2638	0.845586		13.2638	0.846631		13.2638	0.843735		13.2638	0.845697		13.2638	0.846025		13.2638	0.846437
13.3383	0.8399		13.3383	0.845719		13.3383	0.840635		13.3383	0.837681		13.3383	0.840345		13.3383	0.842352		13.3383	0.842961		13.3383	0.856046		13.3383	0.844094		13.3383	0.844862		13.3383	0.846388		13.3383	0.844181		13.3383	0.846164		13.3383	0.845934		13.3383	0.844567
13.4128	0.840365		13.4128	0.846121		13.4128	0.840159		13.4128	0.838252		13.4128	0.840083		13.4128	0.841953		13.4128	0.843284		13.4128	0.856289		13.4128	0.845062		13.4128	0.84463		13.4128	0.846582		13.4128	0.84342		13.4128	0.846226		13.4128	0.845816		13.4128	0.845354
13.4873	0.839502		13.4873	0.845486		13.4873	0.839049		13.4873	0.838122		13.4873	0.839103		13.4873	0.841366		13.4873	0.841059		13.4873	0.856095		13.4873	0.84313		13.4873	0.844875		13.4873	0.845881		13.4873	0.844316		13.4873	0.84594		13.4873	0.845888		13.4873	0.846063
13.5618	0.840581		13.5618	0.84537		13.5618	0.83996		13.5618	0.837417		13.5618	0.839582		13.5618	0.84165		13.5618	0.841878		13.5618	0.855784		13.5618	0.843928		13.5618	0.845711		13.5618	0.846679		13.5618	0.842215		13.5618	0.846239		13.5618	0.846055		13.5618	0.844841
13.6364	0.839754		13.6364	0.845416		13.6364	0.839888		13.6364	0.837321		13.6364	0.839476		13.6364	0.841061		13.6364	0.841832		13.6364	0.855618		13.6364	0.842911		13.6364	0.844703		13.6364	0.846444		13.6364	0.843334		13.6364	0.844988		13.6364	0.845089		13.6364	0.845056
13.7109	0.840387		13.7109	0.845648		13.7109	0.839773		13.7109	0.836904		13.7109	0.839137		13.7109	0.84151		13.7109	0.842591		13.7109	0.855494		13.7109	0.843914		13.7109	0.844615		13.7109	0.846957		13.7109	0.843733		13.7109	0.845301		13.7109	0.84499		13.7109	0.844664
13.7854	0.840003		13.7854	0.845405		13.7854	0.839729		13.7854	0.837855		13.7854	0.839618		13.7854	0.841368		13.7854	0.842182		13.7854	0.855839		13.7854	0.844251		13.7854	0.845346		13.7854	0.846561		13.7854	0.842981		13.7854	0.845324		13.7854	0.845227		13.7854	0.845593
13.8599	0.839936		13.8599	0.844686		13.8599	0.84055		13.8599	0.837741		13.8599	0.839213		13.8599	0.840419		13.8599	0.841966		13.8599	0.855959		13.8599	0.844328		13.8599	0.845976		13.8599	0.845472		13.8599	0.843813		13.8599	0.845534		13.8599	0.845408		13.8599	0.84454
13.9344	0.839268		13.9344	0.844432		13.9344	0.839718		13.9344	0.837353		13.9344	0.839386		13.9344	0.840743		13.9344	0.840484		13.9344	0.855448		13.9344	0.842323		13.9344	0.844214		13.9344	0.846685		13.9344	0.842749		13.9344	0.845627		13.9344	0.845281		13.9344	0.845482
14.0089	0.839289		14.0089	0.844745		14.0089	0.838903		14.0089	0.836281		14.0089	0.839426		14.0089	0.840232		14.0089	0.841643		14.0089	0.854331		14.0089	0.843451		14.0089	0.84489		14.0089	0.844823		14.0089	0.843306		14.0089	0.845142		14.0089	0.843712		14.0089	0.843842
14.0834	0.839026		14.0834	0.844947		14.0834	0.839589		14.0834	0.837469		14.0834	0.838699		14.0834	0.840418		14.0834	0.841753		14.0834	0.854983		14.0834	0.843271		14.0834	0.843744		14.0834	0.846571		14.0834	0.842807		14.0834	0.844891		14.0834	0.844331		14.0834	0.844306
14.158	0.839197		14.158	0.844333		14.158	0.839253		14.158	0.836868		14.158	0.838099		14.158	0.840177		14.158	0.840182		14.158	0.855539		14.158	0.843737		14.158	0.844267		14.158	0.846493		14.158	0.842595		14.158	0.845309		14.158	0.843933		14.158	0.844304
14.2325	0.839117		14.2325	0.843769		14.2325	0.839554		14.2325	0.836612		14.2325	0.83845		14.2325	0.840282		14.2325	0.840939		14.2325	0.855763		14.2325	0.843462		14.2325	0.844495		14.2325	0.845323		14.2325	0.842466		14.2325	0.84438		14.2325	0.844446		14.2325	0.844201
14.307	0.839324		14.307	0.844745		14.307	0.838535		14.307	0.837785		14.307	0.83836		14.307	0.840979		14.307	0.84125		14.307	0.855088		14.307	0.843135		14.307	0.844707		14.307	0.844718		14.307	0.841792		14.307	0.844363		14.307	0.844446		14.307	0.844059
14.3815	0.838961		14.3815	0.844292		14.3815	0.839477		14.3815	0.836332		14.3815	0.838749		14.3815	0.839858		14.3815	0.841917		14.3815	0.855513		14.3815	0.842721		14.3815	0.844291		14.3815	0.846464		14.3815	0.843096		14.3815	0.844557		14.3815	0.845444		14.3815	0.843255
14.456	0.838989		14.456	0.843749		14.456	0.839652		14.456	0.836832		14.456	0.838627		14.456	0.840292		14.456	0.840434		14.456	0.854858		14.456	0.841929		14.456	0.844516		14.456	0.844773		14.456	0.842792		14.456	0.84404		14.456	0.844428		14.456	0.843807
14.5305	0.838455		14.5305	0.843756		14.5305	0.839486		14.5305	0.837038		14.5305	0.837992		14.5305	0.84048		14.5305	0.841067		14.5305	0.855307		14.5305	0.841446		14.5305	0.842993		14.5305	0.845128		14.5305	0.842074		14.5305	0.844048		14.5305	0.844337		14.5305	0.842726
14.6051	0.838027		14.6051	0.843621		14.6051	0.83904		14.6051	0.836702		14.6051	0.838372		14.6051	0.839839		14.6051	0.840722		14.6051	0.854265		14.6051	0.841926		14.6051	0.843114		14.6051	0.845919		14.6051	0.842539		14.6051	0.844042		14.6051	0.843674		14.6051	0.843732
14.6796	0.838238		14.6796	0.844518		14.6796	0.839046		14.6796	0.835724		14.6796	0.837995		14.6796	0.84008		14.6796	0.840832		14.6796	0.854523		14.6796	0.842266		14.6796	0.843497		14.6796	0.845296		14.6796	0.841488		14.6796	0.843949		14.6796	0.843134		14.6796	0.844014
14.7541	0.838904		14.7541	0.844095		14.7541	0.83846		14.7541	0.836834		14.7541	0.837318		14.7541	0.839457		14.7541	0.840376		14.7541	0.855202		14.7541	0.842551		14.7541	0.84444		14.7541	0.845174		14.7541	0.842462		14.7541	0.843741		14.7541	0.842909		14.7541	0.843242
14.8286	0.838666		14.8286	0.843812		14.8286	0.83854		14.8286	0.835475		14.8286	0.837685		14.8286	0.840278		14.8286	0.840333		14.8286	0.854743		14.8286	0.843226		14.8286	0.843184		14.8286	0.845079		14.8286	0.84286		14.8286	0.843051		14.8286	0.842909		14.8286	0.843215
14.9031	0.838134		14.9031	0.84335		14.9031	0.838732		14.9031	0.835923		14.9031	0.837847		14.9031	0.840548		14.9031	0.840077		14.9031	0.854438		14.9031	0.841312		14.9031	0.843654		14.9031	0.84449		14.9031	0.842133		14.9031	0.844291		14.9031	0.843642		14.9031	0.843068
14.9776	0.838216		14.9776	0.843417		14.9776	0.839093		14.9776	0.835754		14.9776	0.837366		14.9776	0.839397		14.9776	0.840739		14.9776	0.854972		14.9776	0.842161		14.9776	0.843934		14.9776	0.845086		14.9776	0.841737		14.9776	0.843694		14.9776	0.843309		14.9776	0.843185
15.0522	0.83772		15.0522	0.844067		15.0522	0.838449		15.0522	0.835379		15.0522	0.836976		15.0522	0.839098		15.0522	0.840793		15.0522	0.8548		15.0522	0.841752		15.0522	0.843083		15.0522	0.84527		15.0522	0.841477		15.0522	0.843717		15.0522	0.843268		15.0522	0.843368
15.1267	0.83723		15.1267	0.842597		15.1267	0.838213		15.1267	0.83567		15.1267	0.837557		15.1267	0.839595		15.1267	0.838975		15.1267	0.854766		15.1267	0.842065		15.1267	0.842595		15.1267	0.844422		15.1267	0.840663		15.1267	0.842933		15.1267	0.843327		15.1267	0.843264
15.2012	0.837413		15.2012	0.843046		15.2012	0.837828		15.2012	0.835505		15.2012	0.837214		15.2012	0.839309		15.2012	0.840106		15.2012	0.855222		15.2012	0.84216		15.2012	0.842829		15.2012	0.844486		15.2012	0.841362		15.2012	0.843061		15.2012	0.842553		15.2012	0.842229
15.2757	0.837086		15.2757	0.843212		15.2757	0.837813		15.2757	0.835766		15.2757	0.837024		15.2757	0.839456		15.2757	0.839803		15.2757	0.853693		15.2757	0.841731		15.2757	0.84316		15.2757	0.843478		15.2757	0.841049		15.2757	0.843632		15.2757	0.842204		15.2757	0.842128
15.3502	0.837806		15.3502	0.843303		15.3502	0.83775		15.3502	0.83532		15.3502	0.837103		15.3502	0.839108		15.3502	0.839099		15.3502	0.854879		15.3502	0.841953		15.3502	0.842843		15.3502	0.844845		15.3502	0.840231		15.3502	0.843595		15.3502	0.843421		15.3502	0.843409
15.4247	0.837417		15.4247	0.842964		15.4247	0.838275		15.4247	0.834984		15.4247	0.837312		15.4247	0.838612		15.4247	0.839809		15.4247	0.854979		15.4247	0.841744		15.4247	0.842473		15.4247	0.844554		15.4247	0.840916		15.4247	0.84355		15.4247	0.842736		15.4247	0.842315
15.4992	0.837542		15.4992	0.84237		15.4992	0.838125		15.4992	0.835637		15.4992	0.83679		15.4992	0.838963		15.4992	0.839784		15.4992	0.854498		15.4992	0.841914		15.4992	0.843849		15.4992	0.844275		15.4992	0.841769		15.4992	0.843022		15.4992	0.843805		15.4992	0.841463
15.5738	0.838041		15.5738	0.843395		15.5738	0.838508		15.5738	0.834392		15.5738	0.83708		15.5738	0.839201		15.5738	0.839349		15.5738	0.85437		15.5738	0.841854		15.5738	0.842381		15.5738	0.844453		15.5738	0.840367		15.5738	0.843208		15.5738	0.842792		15.5738	0.842667
15.6483	0.837019		15.6483	0.843204		15.6483	0.838486		15.6483	0.83525		15.6483	0.837164		15.6483	0.839986		15.6483	0.839445		15.6483	0.854468		15.6483	0.841705		15.6483	0.842597		15.6483	0.844124		15.6483	0.840392		15.6483	0.842177		15.6483	0.841993		15.6483	0.842837
15.7228	0.837879		15.7228	0.842832		15.7228	0.837504		15.7228	0.83501		15.7228	0.837212		15.7228	0.838342		15.7228	0.839738		15.7228	0.854432		15.7228	0.842184		15.7228	0.842385		15.7228	0.844359		15.7228	0.840435		15.7228	0.842898		15.7228	0.842431		15.7228	0.842122
15.7973	0.837505		15.7973	0.841762		15.7973	0.837758		15.7973	0.834574		15.7973	0.836749		15.7973	0.837538		15.7973	0.83942		15.7973	0.853867		15.7973	0.841366		15.7973	0.842287		15.7973	0.844019		15.7973	0.840435		15.7973	0.843059		15.7973	0.843447		15.7973	0.842221
15.8718	0.837311		15.8718	0.843125		15.8718	0.837027		15.8718	0.833985		15.8718	0.8359		15.8718	0.838641		15.8718	0.839437		15.8718	0.854644		15.8718	0.84143		15.8718	0.842252		15.8718	0.843487		15.8718	0.840675		15.8718	0.841569		15.8718	0.842955		15.8718	0.842426
15.9463	0.836615		15.9463	0.842403		15.9463	0.837909		15.9463	0.834864		15.9463	0.83664		15.9463	0.83766		15.9463	0.839606		15.9463	0.854274		15.9463	0.840522		15.9463	0.84258		15.9463	0.843347		15.9463	0.840184		15.9463	0.842664		15.9463	0.84173		15.9463	0.841445
16.0209	0.837123		16.0209	0.84269		16.0209	0.837802		16.0209	0.834845		16.0209	0.835981		16.0209	0.838604		16.0209	0.839425		16.0209	0.853972		16.0209	0.841618		16.0209	0.84205		16.0209	0.844139		16.0209	0.840266		16.0209	0.84205		16.0209	0.841567		16.0209	0.842621
16.0954	0.836528		16.0954	0.843177		16.0954	0.837112		16.0954	0.834193		16.0954	0.835909		16.0954	0.838297		16.0954	0.839557		16.0954	0.853262		16.0954	0.841325		16.0954	0.842055		16.0954	0.843178		16.0954	0.840514		16.0954	0.84267		16.0954	0.842047		16.0954	0.842406
16.1699	0.836832		16.1699	0.842654		16.1699	0.837174		16.1699	0.834834		16.1699	0.836557		16.1699	0.83891		16.1699	0.83871		16.1699	0.854001		16.1699	0.840181		16.1699	0.840917		16.1699	0.844161		16.1699	0.839751		16.1699	0.842944		16.1699	0.842312		16.1699	0.842243
16.2444	0.837206		16.2444	0.842664		16.2444	0.837045		16.2444	0.834801		16.2444	0.837267		16.2444	0.838839		16.2444	0.838735		16.2444	0.854845		16.2444	0.840495		16.2444	0.841987		16.2444	0.844676		16.2444	0.839715		16.2444	0.842865		16.2444	0.84231		16.2444	0.841616
16.3189	0.836725		16.3189	0.842265		16.3189	0.837432		16.3189	0.833966		16.3189	0.835615		16.3189	0.837981		16.3189	0.839129		16.3189	0.854231		16.3189	0.841094		16.3189	0.841442		16.3189	0.842705		16.3189	0.839535		16.3189	0.841765		16.3189	0.84147		16.3189	0.842327
16.3934	0.836632		16.3934	0.84257		16.3934	0.837242		16.3934	0.834058		16.3934	0.835878		16.3934	0.837814		16.3934	0.838583		16.3934	0.85496		16.3934	0.840877		16.3934	0.841919		16.3934	0.843195		16.3934	0.839309		16.3934	0.841874		16.3934	0.842585		16.3934	0.841522
16.4679	0.836212		16.4679	0.841836		16.4679	0.836965		16.4679	0.834052		16.4679	0.836109		16.4679	0.8379		16.4679	0.838915		16.4679	0.854138		16.4679	0.839451		16.4679	0.841643		16.4679	0.845246		16.4679	0.839624		16.4679	0.841765		16.4679	0.841501		16.4679	0.841459
16.5425	0.836737		16.5425	0.841524		16.5425	0.837395		16.5425	0.834711		16.5425	0.834731		16.5425	0.837731		16.5425	0.838526		16.5425	0.854536		16.5425	0.839344		16.5425	0.841751		16.5425	0.843425		16.5425	0.839592		16.5425	0.841844		16.5425	0.842059		16.5425	0.841547
16.617	0.836588		16.617	0.841554		16.617	0.837298		16.617	0.834429		16.617	0.835757		16.617	0.838733		16.617	0.838975		16.617	0.854387		16.617	0.84089		16.617	0.841552		16.617	0.843399		16.617	0.839805		16.617	0.841405		16.617	0.84139		16.617	0.841564
16.6915	0.836767		16.6915	0.842556		16.6915	0.836077		16.6915	0.834405		16.6915	0.835555		16.6915	0.838382		16.6915	0.839415		16.6915	0.853865		16.6915	0.840612		16.6915	0.841263		16.6915	0.842779		16.6915	0.84007		16.6915	0.842095		16.6915	0.842433		16.6915	0.841404
16.766	0.836517		16.766	0.841246		16.766	0.83672		16.766	0.833994		16.766	0.835672		16.766	0.838093		16.766	0.839466		16.766	0.853552		16.766	0.839713		16.766	0.841451		16.766	0.843327		16.766	0.839655		16.766	0.841765		16.766	0.842003		16.766	0.841163
16.8405	0.8364		16.8405	0.8423		16.8405	0.836271		16.8405	0.83434		16.8405	0.835946		16.8405	0.838611		16.8405	0.839269		16.8405	0.853803		16.8405	0.839622		16.8405	0.841057		16.8405	0.844067		16.8405	0.839646		16.8405	0.841273		16.8405	0.841848		16.8405	0.841318
16.915	0.836649		16.915	0.84151		16.915	0.83647		16.915	0.833445		16.915	0.835004		16.915	0.837211		16.915	0.839129		16.915	0.853015		16.915	0.840528		16.915	0.840875		16.915	0.843138		16.915	0.83947		16.915	0.842408		16.915	0.841484		16.915	0.841912
16.9896	0.836219		16.9896	0.840999		16.9896	0.836823		16.9896	0.833544		16.9896	0.835683		16.9896	0.83717		16.9896	0.839115		16.9896	0.854608		16.9896	0.839391		16.9896	0.842011		16.9896	0.841981		16.9896	0.839479		16.9896	0.84138		16.9896	0.841191		16.9896	0.84209
17.0641	0.836182		17.0641	0.841459		17.0641	0.836579		17.0641	0.833452		17.0641	0.835594		17.0641	0.837595		17.0641	0.838839		17.0641	0.85369		17.0641	0.839067		17.0641	0.841171		17.0641	0.84201		17.0641	0.838859		17.0641	0.841829		17.0641	0.841639		17.0641	0.842055
17.1386	0.835933		17.1386	0.841869		17.1386	0.836254		17.1386	0.833165		17.1386	0.834493		17.1386	0.837607		17.1386	0.837432		17.1386	0.853603		17.1386	0.839744		17.1386	0.840674		17.1386	0.843088		17.1386	0.840079		17.1386	0.840688		17.1386	0.841583		17.1386	0.840996
17.2131	0.835945		17.2131	0.841575		17.2131	0.836359		17.2131	0.832677		17.2131	0.835407		17.2131	0.837256		17.2131	0.838688		17.2131	0.854091		17.2131	0.839998		17.2131	0.840105		17.2131	0.843204		17.2131	0.83885		17.2131	0.840982		17.2131	0.840816		17.2131	0.841714
17.2876	0.836444		17.2876	0.840809		17.2876	0.836675		17.2876	0.833816		17.2876	0.834971		17.2876	0.83701		17.2876	0.839118		17.2876	0.853318		17.2876	0.83981		17.2876	0.840005		17.2876	0.842503		17.2876	0.839001		17.2876	0.841351		17.2876	0.840757		17.2876	0.841189
17.3621	0.835676		17.3621	0.840872		17.3621	0.836869		17.3621	0.832785		17.3621	0.835195		17.3621	0.837161		17.3621	0.839089		17.3621	0.853863		17.3621	0.840296		17.3621	0.839998		17.3621	0.843204		17.3621	0.839341		17.3621	0.840368		17.3621	0.841183		17.3621	0.840891
17.4366	0.836854		17.4366	0.840838		17.4366	0.836649		17.4366	0.833488		17.4366	0.834945		17.4366	0.837086		17.4366	0.837707		17.4366	0.854877		17.4366	0.839517		17.4366	0.841547		17.4366	0.843625		17.4366	0.839277		17.4366	0.842157		17.4366	0.841695		17.4366	0.841834
17.5112	0.836446		17.5112	0.841165		17.5112	0.835955		17.5112	0.833182		17.5112	0.835582		17.5112	0.836501		17.5112	0.838913		17.5112	0.854146		17.5112	0.839795		17.5112	0.840226		17.5112	0.842939		17.5112	0.839262		17.5112	0.84174		17.5112	0.84141		17.5112	0.840833
17.5857	0.83584		17.5857	0.841064		17.5857	0.836124		17.5857	0.832551		17.5857	0.835331		17.5857	0.837418		17.5857	0.837778		17.5857	0.853961		17.5857	0.83934		17.5857	0.8406		17.5857	0.842107		17.5857	0.83888		17.5857	0.840883		17.5857	0.841657		17.5857	0.841514
17.6602	0.835897		17.6602	0.841057		17.6602	0.836096		17.6602	0.833705		17.6602	0.834396		17.6602	0.838077		17.6602	0.838729		17.6602	0.853628		17.6602	0.838856		17.6602	0.839886		17.6602	0.841863		17.6602	0.839421		17.6602	0.841586		17.6602	0.840787		17.6602	0.840153
17.7347	0.835137		17.7347	0.840616		17.7347	0.835648		17.7347	0.832924		17.7347	0.835283		17.7347	0.837022		17.7347	0.837603		17.7347	0.853956		17.7347	0.839398		17.7347	0.840289		17.7347	0.842571		17.7347	0.838887		17.7347	0.841617		17.7347	0.841012		17.7347	0.841138
17.8092	0.83621		17.8092	0.840859		17.8092	0.836581		17.8092	0.832622		17.8092	0.834672		17.8092	0.837494		17.8092	0.838088		17.8092	0.854508		17.8092	0.838758		17.8092	0.840438		17.8092	0.842777		17.8092	0.838709		17.8092	0.841182		17.8092	0.840327		17.8092	0.840461
17.8837	0.835745		17.8837	0.841016		17.8837	0.835127		17.8837	0.832405		17.8837	0.834628		17.8837	0.836938		17.8837	0.838172		17.8837	0.854357		17.8837	0.840016		17.8837	0.84056		17.8837	0.841743		17.8837	0.838269		17.8837	0.84124		17.8837	0.840974		17.8837	0.840606
17.9583	0.835417		17.9583	0.840237		17.9583	0.83579		17.9583	0.833311		17.9583	0.83474		17.9583	0.836643		17.9583	0.838361		17.9583	0.853379		17.9583	0.839024		17.9583	0.840595		17.9583	0.841489		17.9583	0.83876		17.9583	0.841137		17.9583	0.840357		17.9583	0.841029
18.0328	0.836016		18.0328	0.840035		18.0328	0.835163		18.0328	0.833274		18.0328	0.834909		18.0328	0.836841		18.0328	0.837463		18.0328	0.85323		18.0328	0.838637		18.0328	0.840221		18.0328	0.84219		18.0328	0.838398		18.0328	0.84106		18.0328	0.840171		18.0328	0.840486
18.1073	0.835633		18.1073	0.840241		18.1073	0.835368		18.1073	0.83251		18.1073	0.834911		18.1073	0.8367		18.1073	0.838191		18.1073	0.854048		18.1073	0.839021		18.1073	0.839911		18.1073	0.84201		18.1073	0.837933		18.1073	0.840156		18.1073	0.839719		18.1073	0.840676
18.1818	0.835961		18.1818	0.840645		18.1818	0.835955		18.1818	0.832875		18.1818	0.834772		18.1818	0.83613		18.1818	0.837846		18.1818	0.853801		18.1818	0.839249		18.1818	0.840431		18.1818	0.841752		18.1818	0.838756		18.1818	0.839993		18.1818	0.840854		18.1818	0.839949
18.2563	0.83539		18.2563	0.840928		18.2563	0.835384		18.2563	0.832884		18.2563	0.834577		18.2563	0.83659		18.2563	0.838148		18.2563	0.853563		18.2563	0.838553		18.2563	0.840667		18.2563	0.842691		18.2563	0.839234		18.2563	0.840887		18.2563	0.84134		18.2563	0.840082
18.3308	0.835764		18.3308	0.839635		18.3308	0.834481		18.3308	0.833312		18.3308	0.834533		18.3308	0.836702		18.3308	0.837954		18.3308	0.853286		18.3308	0.840031		18.3308	0.840481		18.3308	0.842328		18.3308	0.838168		18.3308	0.840648		18.3308	0.840135		18.3308	0.840543
18.4054	0.835361		18.4054	0.840246		18.4054	0.834627		18.4054	0.832478		18.4054	0.834437		18.4054	0.836994		18.4054	0.837728		18.4054	0.854747		18.4054	0.839222		18.4054	0.839889		18.4054	0.842304		18.4054	0.838754		18.4054	0.84131		18.4054	0.840135		18.4054	0.840405
18.4799	0.835983		18.4799	0.839972		18.4799	0.834425		18.4799	0.83303		18.4799	0.834391		18.4799	0.837155		18.4799	0.837351		18.4799	0.853565		18.4799	0.837902		18.4799	0.839958		18.4799	0.842249		18.4799	0.838657		18.4799	0.839769		18.4799	0.840241		18.4799	0.840266
18.5544	0.835999		18.5544	0.840472		18.5544	0.835267		18.5544	0.832896		18.5544	0.834132		18.5544	0.836366		18.5544	0.837873		18.5544	0.853241		18.5544	0.838409		18.5544	0.839131		18.5544	0.841901		18.5544	0.838617		18.5544	0.841532		18.5544	0.840269		18.5544	0.840491
18.6289	0.835572		18.6289	0.840864		18.6289	0.835251		18.6289	0.832578		18.6289	0.834256		18.6289	0.836871		18.6289	0.837136		18.6289	0.853748		18.6289	0.838805		18.6289	0.839322		18.6289	0.841633		18.6289	0.838391		18.6289	0.840788		18.6289	0.839777		18.6289	0.84043
18.7034	0.835169		18.7034	0.840198		18.7034	0.835195		18.7034	0.832828		18.7034	0.834331		18.7034	0.835485		18.7034	0.838734		18.7034	0.853543		18.7034	0.838516		18.7034	0.839963		18.7034	0.841594		18.7034	0.838434		18.7034	0.840045		18.7034	0.840261		18.7034	0.84023
18.7779	0.83538		18.7779	0.839876		18.7779	0.835181		18.7779	0.832656		18.7779	0.834089		18.7779	0.836587		18.7779	0.838164		18.7779	0.853098		18.7779	0.838843		18.7779	0.839514		18.7779	0.84192		18.7779	0.83795		18.7779	0.840498		18.7779	0.840709		18.7779	0.840126
18.8524	0.836042		18.8524	0.840103		18.8524	0.834652		18.8524	0.832537		18.8524	0.834052		18.8524	0.836456		18.8524	0.837528		18.8524	0.8529		18.8524	0.838913		18.8524	0.839755		18.8524	0.84183		18.8524	0.838089		18.8524	0.840475		18.8524	0.841093		18.8524	0.841028
18.927	0.834308		18.927	0.840227		18.927	0.835039		18.927	0.832188		18.927	0.834235		18.927	0.836268		18.927	0.837123		18.927	0.852953		18.927	0.838462		18.927	0.839326		18.927	0.842518		18.927	0.838454		18.927	0.840599		18.927	0.839634		18.927	0.840521
19.0015	0.8351		19.0015	0.839476		19.0015	0.834873		19.0015	0.831681		19.0015	0.833912		19.0015	0.836186		19.0015	0.837503		19.0015	0.852783		19.0015	0.838136		19.0015	0.839226		19.0015	0.841992		19.0015	0.838449		19.0015	0.840988		19.0015	0.839954		19.0015	0.840029
19.076	0.835063		19.076	0.838805		19.076	0.834645		19.076	0.832014		19.076	0.833996		19.076	0.836494		19.076	0.83817		19.076	0.853524		19.076	0.838871		19.076	0.839609		19.076	0.841151		19.076	0.837598		19.076	0.840405		19.076	0.840315		19.076	0.840158
19.1505	0.834847		19.1505	0.839168		19.1505	0.834197		19.1505	0.831498		19.1505	0.833598		19.1505	0.836445		19.1505	0.837447		19.1505	0.853799		19.1505	0.838182		19.1505	0.839641		19.1505	0.842486		19.1505	0.838443		19.1505	0.841182		19.1505	0.840131		19.1505	0.839815
19.225	0.834897		19.225	0.839779		19.225	0.833604		19.225	0.831722		19.225	0.83424		19.225	0.835148		19.225	0.83718		19.225	0.853614		19.225	0.837928		19.225	0.839587		19.225	0.841099		19.225	0.838321		19.225	0.83963		19.225	0.839249		19.225	0.840003
19.2995	0.835132		19.2995	0.839414		19.2995	0.833995		19.2995	0.831919		19.2995	0.833611		19.2995	0.835981		19.2995	0.836923		19.2995	0.854152		19.2995	0.838666		19.2995	0.838908		19.2995	0.841515		19.2995	0.837306		19.2995	0.840273		19.2995	0.839542		19.2995	0.840472
19.3741	0.835122		19.3741	0.839847		19.3741	0.834708		19.3741	0.832312		19.3741	0.834053		19.3741	0.836929		19.3741	0.837216		19.3741	0.853563		19.3741	0.838846		19.3741	0.839018		19.3741	0.842233		19.3741	0.83866		19.3741	0.840133		19.3741	0.840257		19.3741	0.840168
19.4486	0.835184		19.4486	0.839359		19.4486	0.833935		19.4486	0.832671		19.4486	0.833887		19.4486	0.836371		19.4486	0.837112		19.4486	0.853761		19.4486	0.839438		19.4486	0.838501		19.4486	0.841762		19.4486	0.837002		19.4486	0.840407		19.4486	0.840474		19.4486	0.83962
19.5231	0.83414		19.5231	0.839097		19.5231	0.834308		19.5231	0.831659		19.5231	0.833793		19.5231	0.836001		19.5231	0.837243		19.5231	0.853803		19.5231	0.838401		19.5231	0.839646		19.5231	0.841572		19.5231	0.838602		19.5231	0.839439		19.5231	0.839713		19.5231	0.840805
19.5976	0.834303		19.5976	0.839462		19.5976	0.83414		19.5976	0.832418		19.5976	0.833917		19.5976	0.835609		19.5976	0.837479		19.5976	0.853893		19.5976	0.837509		19.5976	0.839716		19.5976	0.841318		19.5976	0.837549		19.5976	0.839694		19.5976	0.840066		19.5976	0.839849
19.6721	0.834866		19.6721	0.838706		19.6721	0.833918		19.6721	0.831738		19.6721	0.832958		19.6721	0.83544		19.6721	0.836599		19.6721	0.852557		19.6721	0.837778		19.6721	0.839654		19.6721	0.840994		19.6721	0.837545		19.6721	0.840189		19.6721	0.839383		19.6721	0.839019
19.7466	0.835048		19.7466	0.838988		19.7466	0.834087		19.7466	0.831568		19.7466	0.832916		19.7466	0.8347		19.7466	0.836936		19.7466	0.852793		19.7466	0.837187		19.7466	0.8396		19.7466	0.84033		19.7466	0.837723		19.7466	0.840001		19.7466	0.839729		19.7466	0.839846
19.8211	0.834152		19.8211	0.839053		19.8211	0.834168		19.8211	0.831309		19.8211	0.833424		19.8211	0.835421		19.8211	0.836673		19.8211	0.853761		19.8211	0.837855		19.8211	0.838556		19.8211	0.841362		19.8211	0.837804		19.8211	0.840203		19.8211	0.840124		19.8211	0.839352
19.8957	0.835118		19.8957	0.838436		19.8957	0.833518		19.8957	0.832559		19.8957	0.834306		19.8957	0.83532		19.8957	0.83653		19.8957	0.854069		19.8957	0.83731		19.8957	0.838444		19.8957	0.842043		19.8957	0.836491		19.8957	0.839933		19.8957	0.840163		19.8957	0.840508
19.9702	0.834813		19.9702	0.839312		19.9702	0.834867		19.9702	0.831933		19.9702	0.834209		19.9702	0.835716		19.9702	0.836304		19.9702	0.85372		19.9702	0.837329		19.9702	0.839024		19.9702	0.841486		19.9702	0.837993		19.9702	0.84072		19.9702	0.839092		19.9702	0.83969
20.0447	0.834483		20.0447	0.838984		20.0447	0.834263		20.0447	0.832229		20.0447	0.833134		20.0447	0.836074		20.0447	0.836281		20.0447	0.853507		20.0447	0.83792		20.0447	0.839307		20.0447	0.841348		20.0447	0.836963		20.0447	0.838897		20.0447	0.839819		20.0447	0.839245
20.1192	0.834603		20.1192	0.838839		20.1192	0.83472		20.1192	0.831421		20.1192	0.834071		20.1192	0.83527		20.1192	0.836788		20.1192	0.853435		20.1192	0.83801		20.1192	0.838991		20.1192	0.841962		20.1192	0.837281		20.1192	0.83949		20.1192	0.839198		20.1192	0.839983
20.1937	0.834815		20.1937	0.838621		20.1937	0.834162		20.1937	0.83134		20.1937	0.833406		20.1937	0.835306		20.1937	0.837027		20.1937	0.853228		20.1937	0.837989		20.1937	0.839245		20.1937	0.841563		20.1937	0.838243		20.1937	0.839198		20.1937	0.839066		20.1937	0.840297
20.2682	0.83426		20.2682	0.838497		20.2682	0.834316		20.2682	0.831918		20.2682	0.833414		20.2682	0.835265		20.2682	0.836904		20.2682	0.853799		20.2682	0.837923		20.2682	0.838016		20.2682	0.841603		20.2682	0.83748		20.2682	0.838841		20.2682	0.838712		20.2682	0.839914
20.3428	0.834178		20.3428	0.838381		20.3428	0.833937		20.3428	0.831734		20.3428	0.833487		20.3428	0.835463		20.3428	0.837252		20.3428	0.852802		20.3428	0.837709		20.3428	0.838748		20.3428	0.841666		20.3428	0.837549		20.3428	0.840026		20.3428	0.838435		20.3428	0.838885
20.4173	0.8344		20.4173	0.83875		20.4173	0.833746		20.4173	0.831672		20.4173	0.833444		20.4173	0.835432		20.4173	0.836717		20.4173	0.854751		20.4173	0.83705		20.4173	0.838306		20.4173	0.841173		20.4173	0.837664		20.4173	0.838959		20.4173	0.839582		20.4173	0.839812
20.4918	0.834956		20.4918	0.838521		20.4918	0.834134		20.4918	0.831797		20.4918	0.833801		20.4918	0.834728		20.4918	0.836479		20.4918	0.853567		20.4918	0.838388		20.4918	0.839766		20.4918	0.840847		20.4918	0.837364		20.4918	0.839595		20.4918	0.840181		20.4918	0.839328
20.5663	0.833891		20.5663	0.838364		20.5663	0.834312		20.5663	0.831711		20.5663	0.833668		20.5663	0.834934		20.5663	0.836693		20.5663	0.853318		20.5663	0.837333		20.5663	0.838291		20.5663	0.84063		20.5663	0.838065		20.5663	0.839839		20.5663	0.839164		20.5663	0.840169
20.6408	0.834761		20.6408	0.838772		20.6408	0.834356		20.6408	0.831185		20.6408	0.833729		20.6408	0.835129		20.6408	0.836523		20.6408	0.854095		20.6408	0.838033		20.6408	0.839015		20.6408	0.841668		20.6408	0.836509		20.6408	0.839328		20.6408	0.839084		20.6408	0.83969
20.7153	0.833694		20.7153	0.838199		20.7153	0.834204		20.7153	0.830683		20.7153	0.83399		20.7153	0.834697		20.7153	0.836651		20.7153	0.853907		20.7153	0.83686		20.7153	0.838055		20.7153	0.840764		20.7153	0.8368		20.7153	0.839134		20.7153	0.838736		20.7153	0.839497
20.7899	0.833935		20.7899	0.838689		20.7899	0.832967		20.7899	0.831051		20.7899	0.833457		20.7899	0.834762		20.7899	0.836348		20.7899	0.853805		20.7899	0.837063		20.7899	0.838471		20.7899	0.841075		20.7899	0.836509		20.7899	0.839684		20.7899	0.838272		20.7899	0.839091
20.8644	0.834104		20.8644	0.838385		20.8644	0.834414		20.8644	0.831488		20.8644	0.833208		20.8644	0.834249		20.8644	0.835832		20.8644	0.853661		20.8644	0.837023		20.8644	0.837635		20.8644	0.839957		20.8644	0.837171		20.8644	0.839519		20.8644	0.839068		20.8644	0.839838
20.9389	0.833835		20.9389	0.838146		20.9389	0.834183		20.9389	0.830953		20.9389	0.833012		20.9389	0.835206		20.9389	0.836235		20.9389	0.854042		20.9389	0.837537		20.9389	0.838328		20.9389	0.841405		20.9389	0.836614		20.9389	0.839723		20.9389	0.838541		20.9389	0.839381
21.0134	0.839903		21.0134	0.844351		21.0134	0.839747		21.0134	0.836046		21.0134	0.838728		21.0134	0.841755		21.0134	0.841938		21.0134	0.859526		21.0134	0.843405		21.0134	0.844074		21.0134	0.84639		21.0134	0.842466		21.0134	0.844706		21.0134	0.84453		21.0134	0.845139
21.0879	0.858349		21.0879	0.861666		21.0879	0.856454		21.0879	0.853475		21.0879	0.855959		21.0879	0.85776		21.0879	0.859233		21.0879	0.87644		21.0879	0.860625		21.0879	0.861708		21.0879	0.863075		21.0879	0.859673		21.0879	0.862311		21.0879	0.862361		21.0879	0.862163
21.1624	0.867451		21.1624	0.870838		21.1624	0.865573		21.1624	0.862941		21.1624	0.864049		21.1624	0.866317		21.1624	0.867921		21.1624	0.885445		21.1624	0.869329		21.1624	0.869338		21.1624	0.871878		21.1624	0.868257		21.1624	0.871056		21.1624	0.870053		21.1624	0.87042
21.2369	0.873124		21.2369	0.876784		21.2369	0.871185		21.2369	0.868432		21.2369	0.870288		21.2369	0.87178		21.2369	0.873288		21.2369	0.891127		21.2369	0.874405		21.2369	0.874759		21.2369	0.878383		21.2369	0.872599		21.2369	0.876059		21.2369	0.876542		21.2369	0.87687
21.3115	0.877075		21.3115	0.881018		21.3115	0.876506		21.3115	0.873232		21.3115	0.874822		21.3115	0.876267		21.3115	0.87803		21.3115	0.896614		21.3115	0.878366		21.3115	0.880472		21.3115	0.882426		21.3115	0.877727		21.3115	0.880654		21.3115	0.880152		21.3115	0.880706
21.386	0.880607		21.386	0.88516		21.386	0.880383		21.386	0.876916		21.386	0.878664		21.386	0.881218		21.386	0.881696		21.386	0.899283		21.386	0.882758		21.386	0.883436		21.386	0.884901		21.386	0.881806		21.386	0.88414		21.386	0.883855		21.386	0.884677
21.4605	0.884389		21.4605	0.8883		21.4605	0.883586		21.4605	0.879445		21.4605	0.882035		21.4605	0.884152		21.4605	0.884875		21.4605	0.903475		21.4605	0.885792		21.4605	0.887544		21.4605	0.889978		21.4605	0.885413		21.4605	0.887406		21.4605	0.886273		21.4605	0.887695
21.535	0.887682		21.535	0.891771		21.535	0.886278		21.535	0.883138		21.535	0.885136		21.535	0.885729		21.535	0.887435		21.535	0.906944		21.535	0.888953		21.535	0.890115		21.535	0.891717		21.535	0.88724		21.535	0.889936		21.535	0.890834		21.535	0.891679
21.6095	0.890338		21.6095	0.893969		21.6095	0.888435		21.6095	0.885457		21.6095	0.887871		21.6095	0.888749		21.6095	0.891116		21.6095	0.908043		21.6095	0.890925		21.6095	0.891795		21.6095	0.89545		21.6095	0.890291		21.6095	0.89327		21.6095	0.894353		21.6095	0.893975
21.684	0.892609		21.684	0.897046		21.684	0.89185		21.684	0.888451		21.684	0.890554		21.684	0.891515		21.684	0.892107		21.684	0.910887		21.684	0.89402		21.684	0.895257		21.684	0.898309		21.684	0.892116		21.684	0.894194		21.684	0.895183		21.684	0.896162
21.7586	0.896455		21.7586	0.898747		21.7586	0.894353		21.7586	0.890613		21.7586	0.892699		21.7586	0.893985		21.7586	0.894998		21.7586	0.913624		21.7586	0.895225		21.7586	0.897207		21.7586	0.898645		21.7586	0.895534		21.7586	0.897056		21.7586	0.896643		21.7586	0.89851

## Sheet: RawData-3
Figure 1 - Figure Supplement 2e - replicate 3
NanoTemper Technologies	NanoTemper Technologies
MO.Affinity Analysis v2.3	MO.Affinity Analysis v2.3
Origin of exported data	Origin of exported data
Project Title:
Comment:
Project File Path:
Analysis-Set Name:	Analysis-Set #1
Exported from:	MST Traces
Exported on:	2023-03-15 10:24:25
Analysis Settings	Analysis Settings
Type of Analysis:	MST
Evaluation strategy:	On Time
Cold Region Start:	-1
Cold Region End:	0
Hot Region Start:	4
Hot Region End:	5
Sample Information	Sample Information		Sample Information	Sample Information		Sample Information	Sample Information		Sample Information	Sample Information		Sample Information	Sample Information		Sample Information	Sample Information		Sample Information	Sample Information		Sample Information	Sample Information		Sample Information	Sample Information		Sample Information	Sample Information		Sample Information	Sample Information		Sample Information	Sample Information		Sample Information	Sample Information		Sample Information	Sample Information		Sample Information	Sample Information
Merge-Set Name:	(#06)		Merge-Set Name:	(#06)		Merge-Set Name:	(#06)		Merge-Set Name:	(#06)		Merge-Set Name:	(#06)		Merge-Set Name:	(#06)		Merge-Set Name:	(#06)		Merge-Set Name:	(#06)		Merge-Set Name:	(#06)		Merge-Set Name:	(#06)		Merge-Set Name:	(#06)		Merge-Set Name:	(#06)		Merge-Set Name:	(#06)		Merge-Set Name:	(#06)		Merge-Set Name:	(#06)
Run Name:	(#06)		Run Name:	(#06)		Run Name:	(#06)		Run Name:	(#06)		Run Name:	(#06)		Run Name:	(#06)		Run Name:	(#06)		Run Name:	(#06)		Run Name:	(#06)		Run Name:	(#06)		Run Name:	(#06)		Run Name:	(#06)		Run Name:	(#06)		Run Name:	(#06)		Run Name:	(#06)
Date of Measurement:	2022-05-27 01:18:57		Date of Measurement:	2022-05-27 01:18:16		Date of Measurement:	2022-05-27 01:17:36		Date of Measurement:	2022-05-27 01:16:55		Date of Measurement:	2022-05-27 01:16:15		Date of Measurement:	2022-05-27 01:15:34		Date of Measurement:	2022-05-27 01:14:54		Date of Measurement:	2022-05-27 01:14:13		Date of Measurement:	2022-05-27 01:12:52		Date of Measurement:	2022-05-27 01:12:12		Date of Measurement:	2022-05-27 01:11:31		Date of Measurement:	2022-05-27 01:10:51		Date of Measurement:	2022-05-27 01:10:10		Date of Measurement:	2022-05-27 01:09:30		Date of Measurement:	2022-05-27 01:08:49
Capillary Type:	Monolith NT.115 Premium Capillary		Capillary Type:	Monolith NT.115 Premium Capillary		Capillary Type:	Monolith NT.115 Premium Capillary		Capillary Type:	Monolith NT.115 Premium Capillary		Capillary Type:	Monolith NT.115 Premium Capillary		Capillary Type:	Monolith NT.115 Premium Capillary		Capillary Type:	Monolith NT.115 Premium Capillary		Capillary Type:	Monolith NT.115 Premium Capillary		Capillary Type:	Monolith NT.115 Premium Capillary		Capillary Type:	Monolith NT.115 Premium Capillary		Capillary Type:	Monolith NT.115 Premium Capillary		Capillary Type:	Monolith NT.115 Premium Capillary		Capillary Type:	Monolith NT.115 Premium Capillary		Capillary Type:	Monolith NT.115 Premium Capillary		Capillary Type:	Monolith NT.115 Premium Capillary
Capillary Position:	16		Capillary Position:	15		Capillary Position:	14		Capillary Position:	13		Capillary Position:	12		Capillary Position:	11		Capillary Position:	10		Capillary Position:	9		Capillary Position:	7		Capillary Position:	6		Capillary Position:	5		Capillary Position:	4		Capillary Position:	3		Capillary Position:	2		Capillary Position:	1
Ligand:	penicillin		Ligand:	penicillin		Ligand:	penicillin		Ligand:	penicillin		Ligand:	penicillin		Ligand:	penicillin		Ligand:	penicillin		Ligand:	penicillin		Ligand:	penicillin		Ligand:	penicillin		Ligand:	penicillin		Ligand:	penicillin		Ligand:	penicillin		Ligand:	penicillin		Ligand:	penicillin
Ligand Concentration:	3.05176e-07		Ligand Concentration:	6.10352e-07		Ligand Concentration:	1.2207e-06		Ligand Concentration:	2.44141e-06		Ligand Concentration:	4.88281e-06		Ligand Concentration:	9.76563e-06		Ligand Concentration:	1.95313e-05		Ligand Concentration:	3.90625e-05		Ligand Concentration:	0.00015625		Ligand Concentration:	0.0003125		Ligand Concentration:	0.000625		Ligand Concentration:	0.00125		Ligand Concentration:	0.0025		Ligand Concentration:	0.005		Ligand Concentration:	0.01
Target:	Pbp2b		Target:	Pbp2b		Target:	Pbp2b		Target:	Pbp2b		Target:	Pbp2b		Target:	Pbp2b		Target:	Pbp2b		Target:	Pbp2b		Target:	Pbp2b		Target:	Pbp2b		Target:	Pbp2b		Target:	Pbp2b		Target:	Pbp2b		Target:	Pbp2b		Target:	Pbp2b
TargetConcentration:	2e-08		TargetConcentration:	2e-08		TargetConcentration:	2e-08		TargetConcentration:	2e-08		TargetConcentration:	2e-08		TargetConcentration:	2e-08		TargetConcentration:	2e-08		TargetConcentration:	2e-08		TargetConcentration:	2e-08		TargetConcentration:	2e-08		TargetConcentration:	2e-08		TargetConcentration:	2e-08		TargetConcentration:	2e-08		TargetConcentration:	2e-08		TargetConcentration:	2e-08
Measurement Settings	Measurement Settings		Measurement Settings	Measurement Settings		Measurement Settings	Measurement Settings		Measurement Settings	Measurement Settings		Measurement Settings	Measurement Settings		Measurement Settings	Measurement Settings		Measurement Settings	Measurement Settings		Measurement Settings	Measurement Settings		Measurement Settings	Measurement Settings		Measurement Settings	Measurement Settings		Measurement Settings	Measurement Settings		Measurement Settings	Measurement Settings		Measurement Settings	Measurement Settings		Measurement Settings	Measurement Settings		Measurement Settings	Measurement Settings
MST-Power:	Medium		MST-Power:	Medium		MST-Power:	Medium		MST-Power:	Medium		MST-Power:	Medium		MST-Power:	Medium		MST-Power:	Medium		MST-Power:	Medium		MST-Power:	Medium		MST-Power:	Medium		MST-Power:	Medium		MST-Power:	Medium		MST-Power:	Medium		MST-Power:	Medium		MST-Power:	Medium
Excitation-Power:	60		Excitation-Power:	60		Excitation-Power:	60		Excitation-Power:	60		Excitation-Power:	60		Excitation-Power:	60		Excitation-Power:	60		Excitation-Power:	60		Excitation-Power:	60		Excitation-Power:	60		Excitation-Power:	60		Excitation-Power:	60		Excitation-Power:	60		Excitation-Power:	60		Excitation-Power:	60
Excitation type:	Nano - RED		Excitation type:	Nano - RED		Excitation type:	Nano - RED		Excitation type:	Nano - RED		Excitation type:	Nano - RED		Excitation type:	Nano - RED		Excitation type:	Nano - RED		Excitation type:	Nano - RED		Excitation type:	Nano - RED		Excitation type:	Nano - RED		Excitation type:	Nano - RED		Excitation type:	Nano - RED		Excitation type:	Nano - RED		Excitation type:	Nano - RED		Excitation type:	Nano - RED
Thermostat Setpoint:	22		Thermostat Setpoint:	22		Thermostat Setpoint:	22		Thermostat Setpoint:	22		Thermostat Setpoint:	22		Thermostat Setpoint:	22		Thermostat Setpoint:	22		Thermostat Setpoint:	22		Thermostat Setpoint:	22		Thermostat Setpoint:	22		Thermostat Setpoint:	22		Thermostat Setpoint:	22		Thermostat Setpoint:	22		Thermostat Setpoint:	22		Thermostat Setpoint:	22
Included	Included		Included	Included		Included	Included		Discarded/Hidden	Discarded/Hidden		Included	Included		Included	Included		Included	Included		Included	Included		Included	Included		Included	Included		Included	Included		Included	Included		Included	Included		Included	Included		Included	Included
Time [s]	Normalized Fluorescence [-]		Time [s]	Normalized Fluorescence [-]		Time [s]	Normalized Fluorescence [-]		Time [s]	Normalized Fluorescence [-]		Time [s]	Normalized Fluorescence [-]		Time [s]	Normalized Fluorescence [-]		Time [s]	Normalized Fluorescence [-]		Time [s]	Normalized Fluorescence [-]		Time [s]	Normalized Fluorescence [-]		Time [s]	Normalized Fluorescence [-]		Time [s]	Normalized Fluorescence [-]		Time [s]	Normalized Fluorescence [-]		Time [s]	Normalized Fluorescence [-]		Time [s]	Normalized Fluorescence [-]		Time [s]	Normalized Fluorescence [-]
-3.57675	1.00058		-3.57675	1.00038		-3.57675	0.999426		-3.57675	0.999834		-3.57675	0.999657		-3.57675	1.00011		-3.57675	0.999837		-3.57675	1.00016		-3.57675	0.999378		-3.57675	1.00013		-3.57675	1.00025		-3.57675	1.00031		-3.57675	0.999846		-3.57675	1.00095		-3.57675	0.999647
-3.50223	1.00072		-3.50223	0.999758		-3.50223	0.999175		-3.50223	1.00034		-3.50223	1.00009		-3.50223	0.999988		-3.50223	0.999832		-3.50223	1.00025		-3.50223	0.999496		-3.50223	1.00034		-3.50223	1.00013		-3.50223	1.00049		-3.50223	0.998985		-3.50223	0.998626		-3.50223	1.00038
-3.42772	0.999725		-3.42772	0.998833		-3.42772	0.999964		-3.42772	0.999611		-3.42772	1.00042		-3.42772	0.999513		-3.42772	0.999275		-3.42772	0.999818		-3.42772	0.99915		-3.42772	0.999801		-3.42772	1.00043		-3.42772	1.00025		-3.42772	0.999736		-3.42772	0.999678		-3.42772	0.99946
-3.3532	0.999446		-3.3532	0.999579		-3.3532	0.999764		-3.3532	1.00079		-3.3532	0.99926		-3.3532	1.00062		-3.3532	0.99926		-3.3532	0.999947		-3.3532	0.999548		-3.3532	1.00072		-3.3532	1.00057		-3.3532	1.00024		-3.3532	1.0001		-3.3532	0.999825		-3.3532	0.999954
-3.27869	0.999493		-3.27869	1.00033		-3.27869	0.99928		-3.27869	0.9989		-3.27869	1.00068		-3.27869	0.999645		-3.27869	0.99969		-3.27869	1.00027		-3.27869	1.00016		-3.27869	1.00031		-3.27869	1.00005		-3.27869	0.999604		-3.27869	0.999643		-3.27869	0.999677		-3.27869	0.999676
-3.20417	0.998994		-3.20417	0.999356		-3.20417	0.999863		-3.20417	1.00027		-3.20417	1.00029		-3.20417	1.00032		-3.20417	1.00002		-3.20417	0.999639		-3.20417	0.999725		-3.20417	1.00047		-3.20417	0.999616		-3.20417	0.999569		-3.20417	0.999793		-3.20417	1.00054		-3.20417	0.999232
-3.12966	0.999102		-3.12966	0.999871		-3.12966	0.999288		-3.12966	0.999785		-3.12966	0.999208		-3.12966	1.00029		-3.12966	1.00043		-3.12966	0.999505		-3.12966	0.999663		-3.12966	0.999258		-3.12966	0.999348		-3.12966	1.00006		-3.12966	0.999456		-3.12966	0.999895		-3.12966	0.99904
-3.05514	0.999996		-3.05514	0.999776		-3.05514	0.99934		-3.05514	0.99864		-3.05514	0.999096		-3.05514	0.999073		-3.05514	1.00049		-3.05514	0.999318		-3.05514	0.999847		-3.05514	1.00007		-3.05514	0.999725		-3.05514	0.999361		-3.05514	0.999646		-3.05514	0.99988		-3.05514	0.999502
-2.98062	0.999551		-2.98062	0.99991		-2.98062	0.999964		-2.98062	0.999894		-2.98062	0.998903		-2.98062	0.999782		-2.98062	1.00017		-2.98062	1.00002		-2.98062	0.999255		-2.98062	0.999321		-2.98062	0.998993		-2.98062	0.999265		-2.98062	0.999607		-2.98062	0.999387		-2.98062	0.999791
-2.90611	0.999669		-2.90611	0.999358		-2.90611	0.999981		-2.90611	0.999255		-2.90611	1.00032		-2.90611	0.999587		-2.90611	0.999478		-2.90611	0.999691		-2.90611	0.999677		-2.90611	0.999265		-2.90611	0.999761		-2.90611	0.998893		-2.90611	1.00007		-2.90611	0.999249		-2.90611	0.999459
-2.83159	0.998959		-2.83159	0.999554		-2.83159	0.999725		-2.83159	1.00105		-2.83159	0.998619		-2.83159	0.999234		-2.83159	0.999404		-2.83159	0.999394		-2.83159	0.999981		-2.83159	0.999589		-2.83159	1.00003		-2.83159	0.999475		-2.83159	0.999854		-2.83159	0.999755		-2.83159	0.999238
-2.75708	0.999089		-2.75708	0.999228		-2.75708	0.999566		-2.75708	0.999306		-2.75708	0.999656		-2.75708	0.999025		-2.75708	0.999218		-2.75708	0.999383		-2.75708	1.0002		-2.75708	0.999168		-2.75708	0.999418		-2.75708	0.99907		-2.75708	0.999005		-2.75708	0.999132		-2.75708	0.99991
-2.68256	0.999168		-2.68256	0.999404		-2.68256	1.00032		-2.68256	0.99983		-2.68256	1.00018		-2.68256	0.999791		-2.68256	1.00006		-2.68256	0.999471		-2.68256	0.999819		-2.68256	0.998942		-2.68256	0.999333		-2.68256	0.999585		-2.68256	0.998385		-2.68256	0.999076		-2.68256	0.999353
-2.60805	0.998911		-2.60805	0.999385		-2.60805	0.999768		-2.60805	0.999108		-2.60805	0.998496		-2.60805	0.999051		-2.60805	1.00002		-2.60805	0.999433		-2.60805	0.99987		-2.60805	0.999186		-2.60805	0.99923		-2.60805	0.999572		-2.60805	0.999555		-2.60805	0.999637		-2.60805	0.99882
-2.53353	0.999496		-2.53353	0.99991		-2.53353	0.999214		-2.53353	1.00001		-2.53353	0.999903		-2.53353	0.999189		-2.53353	0.998753		-2.53353	0.999133		-2.53353	0.999379		-2.53353	0.998944		-2.53353	0.998944		-2.53353	0.998441		-2.53353	0.999743		-2.53353	0.998225		-2.53353	0.999352
-2.45901	0.999103		-2.45901	1.00014		-2.45901	0.999119		-2.45901	1.001		-2.45901	0.99919		-2.45901	0.998596		-2.45901	0.999172		-2.45901	0.999026		-2.45901	0.999948		-2.45901	1.00035		-2.45901	0.999204		-2.45901	0.999528		-2.45901	0.998596		-2.45901	0.999471		-2.45901	0.999207
-2.3845	0.998994		-2.3845	0.999043		-2.3845	0.99868		-2.3845	1.00051		-2.3845	1.00044		-2.3845	0.998563		-2.3845	0.999619		-2.3845	0.998635		-2.3845	0.999149		-2.3845	0.999612		-2.3845	0.999322		-2.3845	0.999189		-2.3845	0.999309		-2.3845	0.999221		-2.3845	0.998295
-2.30998	0.999634		-2.30998	0.999332		-2.30998	0.99927		-2.30998	0.999934		-2.30998	1.00015		-2.30998	0.999432		-2.30998	1.00032		-2.30998	0.999955		-2.30998	0.998988		-2.30998	0.999526		-2.30998	0.998535		-2.30998	0.999006		-2.30998	0.99903		-2.30998	0.999665		-2.30998	0.999085
-2.23547	0.99898		-2.23547	0.999684		-2.23547	1.00019		-2.23547	0.999474		-2.23547	0.998834		-2.23547	0.999528		-2.23547	0.999363		-2.23547	1.00024		-2.23547	0.999928		-2.23547	0.998633		-2.23547	0.998232		-2.23547	0.999492		-2.23547	0.998559		-2.23547	0.998588		-2.23547	0.998997
-2.16095	0.999559		-2.16095	0.999805		-2.16095	0.998489		-2.16095	0.999121		-2.16095	0.999686		-2.16095	0.999402		-2.16095	0.999784		-2.16095	0.999689		-2.16095	0.999424		-2.16095	0.999114		-2.16095	0.998528		-2.16095	0.998802		-2.16095	0.99958		-2.16095	0.999086		-2.16095	0.999224
-2.08644	0.999493		-2.08644	0.998837		-2.08644	0.999175		-2.08644	0.999389		-2.08644	0.999036		-2.08644	0.999343		-2.08644	1.00047		-2.08644	0.999461		-2.08644	0.999611		-2.08644	0.999231		-2.08644	0.999051		-2.08644	0.999521		-2.08644	0.99793		-2.08644	0.999109		-2.08644	0.999238
-2.01192	0.998813		-2.01192	0.998553		-2.01192	0.998977		-2.01192	1.00074		-2.01192	0.998579		-2.01192	0.999636		-2.01192	0.999115		-2.01192	0.999463		-2.01192	0.999387		-2.01192	0.998063		-2.01192	0.999044		-2.01192	1.00014		-2.01192	0.998843		-2.01192	0.998996		-2.01192	0.999199
-1.93741	0.999087		-1.93741	0.999311		-1.93741	0.999132		-1.93741	1.00005		-1.93741	0.999258		-1.93741	0.999625		-1.93741	1.00025		-1.93741	0.998318		-1.93741	0.999367		-1.93741	0.999184		-1.93741	0.997826		-1.93741	0.997943		-1.93741	0.998979		-1.93741	0.998706		-1.93741	0.998866
-1.86289	0.998442		-1.86289	0.999484		-1.86289	0.998664		-1.86289	0.999266		-1.86289	0.999744		-1.86289	0.998275		-1.86289	0.998858		-1.86289	0.999156		-1.86289	0.999174		-1.86289	0.998196		-1.86289	0.998769		-1.86289	0.999821		-1.86289	0.998655		-1.86289	0.998735		-1.86289	0.998791
-1.78837	0.998871		-1.78837	0.999826		-1.78837	0.998612		-1.78837	0.999253		-1.78837	0.999574		-1.78837	0.99848		-1.78837	0.999675		-1.78837	0.999326		-1.78837	0.998646		-1.78837	0.999222		-1.78837	0.998867		-1.78837	0.998098		-1.78837	0.999235		-1.78837	0.998217		-1.78837	0.999088
-1.71386	0.998195		-1.71386	0.998462		-1.71386	0.999107		-1.71386	0.999892		-1.71386	0.998807		-1.71386	0.999124		-1.71386	0.999132		-1.71386	0.998864		-1.71386	1.00011		-1.71386	0.998762		-1.71386	0.998768		-1.71386	0.998638		-1.71386	0.998669		-1.71386	0.998876		-1.71386	0.998286
-1.63934	0.999057		-1.63934	0.998339		-1.63934	0.998433		-1.63934	0.99854		-1.63934	0.999219		-1.63934	0.998783		-1.63934	0.998604		-1.63934	0.999303		-1.63934	0.999523		-1.63934	0.999506		-1.63934	0.998103		-1.63934	0.998775		-1.63934	0.998259		-1.63934	0.998448		-1.63934	0.99746
-1.56483	0.998135		-1.56483	0.99983		-1.56483	0.999356		-1.56483	0.999164		-1.56483	0.998018		-1.56483	0.999535		-1.56483	0.999929		-1.56483	0.998939		-1.56483	0.997773		-1.56483	0.998917		-1.56483	0.997976		-1.56483	0.999009		-1.56483	0.998726		-1.56483	0.998891		-1.56483	0.998363
-1.49031	0.998951		-1.49031	0.997737		-1.49031	0.998054		-1.49031	0.999266		-1.49031	0.99887		-1.49031	0.998398		-1.49031	0.998296		-1.49031	0.998744		-1.49031	0.998977		-1.49031	0.999195		-1.49031	0.998478		-1.49031	0.998511		-1.49031	0.998761		-1.49031	0.998482		-1.49031	0.997836
-1.4158	0.997903		-1.4158	0.99852		-1.4158	0.998678		-1.4158	1.00019		-1.4158	0.998841		-1.4158	0.999156		-1.4158	0.999041		-1.4158	0.998987		-1.4158	0.998682		-1.4158	0.999222		-1.4158	0.998193		-1.4158	0.999031		-1.4158	0.998275		-1.4158	0.999144		-1.4158	0.998917
-1.34128	0.998624		-1.34128	0.997941		-1.34128	0.998264		-1.34128	0.998844		-1.34128	0.999439		-1.34128	0.998428		-1.34128	0.999009		-1.34128	0.999277		-1.34128	0.999038		-1.34128	0.997303		-1.34128	0.997815		-1.34128	0.998838		-1.34128	0.998387		-1.34128	0.998195		-1.34128	0.999065
-1.26677	0.99819		-1.26677	0.998295		-1.26677	0.998734		-1.26677	0.999881		-1.26677	0.998671		-1.26677	0.998839		-1.26677	1.00064		-1.26677	0.998661		-1.26677	0.99951		-1.26677	0.998124		-1.26677	0.998237		-1.26677	0.999098		-1.26677	0.997106		-1.26677	0.998379		-1.26677	0.998315
-1.19225	0.998044		-1.19225	0.999		-1.19225	0.998202		-1.19225	0.999555		-1.19225	0.998365		-1.19225	0.998808		-1.19225	0.998908		-1.19225	0.998496		-1.19225	0.99851		-1.19225	0.998683		-1.19225	0.998116		-1.19225	0.9986		-1.19225	0.998572		-1.19225	0.99726		-1.19225	0.998784
-1.11773	0.997615		-1.11773	0.999072		-1.11773	0.998486		-1.11773	0.999922		-1.11773	0.998359		-1.11773	0.998538		-1.11773	0.999365		-1.11773	0.99868		-1.11773	0.999322		-1.11773	0.998329		-1.11773	0.998667		-1.11773	0.999002		-1.11773	0.998437		-1.11773	0.997599		-1.11773	0.997845
-1.04322	0.998632		-1.04322	0.998575		-1.04322	0.998794		-1.04322	0.998829		-1.04322	0.99824		-1.04322	0.998015		-1.04322	0.999387		-1.04322	0.999068		-1.04322	0.999018		-1.04322	0.99825		-1.04322	0.998506		-1.04322	0.998243		-1.04322	0.998169		-1.04322	0.997864		-1.04322	0.999124
-0.968703	0.997815		-0.968703	0.997924		-0.968703	0.999027		-0.968703	0.999304		-0.968703	0.999531		-0.968703	0.998163		-0.968703	0.998783		-0.968703	0.998718		-0.968703	0.998194		-0.968703	0.998653		-0.968703	0.998885		-0.968703	0.999175		-0.968703	0.997897		-0.968703	0.9976		-0.968703	0.998613
-0.894187	0.997974		-0.894187	0.998392		-0.894187	0.998357		-0.894187	0.998599		-0.894187	0.998681		-0.894187	0.99794		-0.894187	0.998252		-0.894187	0.997828		-0.894187	0.998858		-0.894187	0.998545		-0.894187	0.998498		-0.894187	0.998766		-0.894187	0.998402		-0.894187	0.998239		-0.894187	0.998386
-0.819672	0.998669		-0.819672	0.998734		-0.819672	0.998635		-0.819672	1.00019		-0.819672	0.999515		-0.819672	0.998649		-0.819672	0.998683		-0.819672	0.998796		-0.819672	0.997482		-0.819672	0.998498		-0.819672	0.998034		-0.819672	0.998374		-0.819672	0.997785		-0.819672	0.99745		-0.819672	0.997915
-0.745156	0.9976		-0.745156	0.998915		-0.745156	0.997961		-0.745156	1.00043		-0.745156	0.998534		-0.745156	0.998116		-0.745156	0.998838		-0.745156	0.998923		-0.745156	0.997464		-0.745156	0.998221		-0.745156	0.998179		-0.745156	0.998814		-0.745156	0.997403		-0.745156	0.998405		-0.745156	0.997942
-0.67064	0.998124		-0.67064	0.998545		-0.67064	0.998334		-0.67064	0.99969		-0.67064	0.998845		-0.67064	0.998639		-0.67064	0.999083		-0.67064	1.00009		-0.67064	0.998305		-0.67064	0.997898		-0.67064	0.998118		-0.67064	0.997716		-0.67064	0.997508		-0.67064	0.998302		-0.67064	0.9978
-0.596125	0.997855		-0.596125	0.99851		-0.596125	0.99813		-0.596125	1.00006		-0.596125	0.998679		-0.596125	0.998112		-0.596125	0.999361		-0.596125	0.998776		-0.596125	0.998404		-0.596125	0.998795		-0.596125	0.997659		-0.596125	0.998789		-0.596125	0.997541		-0.596125	0.997556		-0.596125	0.997504
-0.521609	0.996857		-0.521609	0.997937		-0.521609	0.997664		-0.521609	0.999385		-0.521609	0.998269		-0.521609	0.998587		-0.521609	0.999019		-0.521609	0.998755		-0.521609	0.998971		-0.521609	0.997873		-0.521609	0.997618		-0.521609	0.997857		-0.521609	0.997853		-0.521609	0.997882		-0.521609	0.996853
-0.447094	0.997578		-0.447094	0.998499		-0.447094	0.997965		-0.447094	0.99946		-0.447094	0.998272		-0.447094	0.99811		-0.447094	0.998832		-0.447094	0.997971		-0.447094	0.998386		-0.447094	0.997896		-0.447094	0.998361		-0.447094	0.999011		-0.447094	0.997396		-0.447094	0.997994		-0.447094	0.997748
-0.372578	0.997113		-0.372578	0.997937		-0.372578	0.998052		-0.372578	0.998708		-0.372578	0.997848		-0.372578	0.998922		-0.372578	0.998254		-0.372578	0.998193		-0.372578	0.998643		-0.372578	0.998875		-0.372578	0.997727		-0.372578	0.99793		-0.372578	0.996629		-0.372578	0.997696		-0.372578	0.997191
-0.298063	0.997398		-0.298063	0.998372		-0.298063	0.997775		-0.298063	0.99946		-0.298063	0.99815		-0.298063	0.99849		-0.298063	0.998725		-0.298063	0.998123		-0.298063	0.998239		-0.298063	0.998545		-0.298063	0.997641		-0.298063	0.997764		-0.298063	0.997617		-0.298063	0.997843		-0.298063	0.998352
-0.223547	0.998462		-0.223547	0.998351		-0.223547	0.997128		-0.223547	0.999057		-0.223547	0.998171		-0.223547	0.998432		-0.223547	0.999101		-0.223547	0.998023		-0.223547	0.998607		-0.223547	0.998669		-0.223547	0.998402		-0.223547	0.998396		-0.223547	0.996693		-0.223547	0.997533		-0.223547	0.997005
-0.149031	0.997361		-0.149031	0.998023		-0.149031	0.997394		-0.149031	0.998795		-0.149031	0.999096		-0.149031	0.998314		-0.149031	0.998969		-0.149031	0.998116		-0.149031	0.998192		-0.149031	0.997804		-0.149031	0.998322		-0.149031	0.998355		-0.149031	0.997962		-0.149031	0.997839		-0.149031	0.997579
-0.0745156	0.998475		-0.0745156	0.998112		-0.0745156	0.997402		-0.0745156	0.999319		-0.0745156	0.998139		-0.0745156	0.998045		-0.0745156	0.999424		-0.0745156	0.998419		-0.0745156	0.99815		-0.0745156	0.998665		-0.0745156	0.997176		-0.0745156	0.997465		-0.0745156	0.997701		-0.0745156	0.997371		-0.0745156	0.995998
0	0.996174		0	0.996651		0	0.996887		0	0.998142		0	0.997194		0	0.996158		0	0.997039		0	0.997888		0	0.997256		0	0.997991		0	0.996373		0	0.996628		0	0.995908		0	0.996873		0	0.996248
0.0745156	0.97823		0.0745156	0.977862		0.0745156	0.979219		0.0745156	0.980347		0.0745156	0.978899		0.0745156	0.978762		0.0745156	0.97893		0.0745156	0.977282		0.0745156	0.978461		0.0745156	0.97821		0.0745156	0.977432		0.0745156	0.977712		0.0745156	0.977211		0.0745156	0.978583		0.0745156	0.977693
0.149031	0.967763		0.149031	0.96997		0.149031	0.967509		0.149031	0.970354		0.149031	0.969054		0.149031	0.969071		0.149031	0.969731		0.149031	0.969045		0.149031	0.968942		0.149031	0.96826		0.149031	0.967591		0.149031	0.968142		0.149031	0.967837		0.149031	0.967499		0.149031	0.967273
0.223547	0.961414		0.223547	0.961998		0.223547	0.961971		0.223547	0.965865		0.223547	0.96251		0.223547	0.96299		0.223547	0.963768		0.223547	0.962994		0.223547	0.962224		0.223547	0.963041		0.223547	0.961588		0.223547	0.962429		0.223547	0.960895		0.223547	0.961489		0.223547	0.960706
0.298062	0.957494		0.298062	0.957219		0.298062	0.956677		0.298062	0.962043		0.298062	0.958651		0.298062	0.958045		0.298062	0.958825		0.298062	0.957792		0.298062	0.959208		0.298062	0.959756		0.298062	0.957611		0.298062	0.956907		0.298062	0.956199		0.298062	0.956167		0.298062	0.956313
0.372578	0.953285		0.372578	0.953939		0.372578	0.954422		0.372578	0.95715		0.372578	0.954931		0.372578	0.954204		0.372578	0.954781		0.372578	0.954276		0.372578	0.954267		0.372578	0.955437		0.372578	0.953368		0.372578	0.953743		0.372578	0.9521		0.372578	0.952324		0.372578	0.95254
0.447093	0.949613		0.447093	0.950099		0.447093	0.950667		0.447093	0.954082		0.447093	0.952819		0.447093	0.950653		0.447093	0.952931		0.447093	0.951117		0.447093	0.951729		0.447093	0.951435		0.447093	0.949132		0.447093	0.94937		0.447093	0.948494		0.447093	0.948302		0.447093	0.948776
0.521609	0.946712		0.521609	0.947302		0.521609	0.947429		0.521609	0.952325		0.521609	0.950018		0.521609	0.948225		0.521609	0.949269		0.521609	0.947274		0.521609	0.948536		0.521609	0.948391		0.521609	0.947253		0.521609	0.946665		0.521609	0.944922		0.521609	0.94561		0.521609	0.944501
0.596125	0.943603		0.596125	0.944787		0.596125	0.945029		0.596125	0.949174		0.596125	0.946307		0.596125	0.945607		0.596125	0.947723		0.596125	0.94481		0.596125	0.945856		0.596125	0.946671		0.596125	0.943974		0.596125	0.943321		0.596125	0.943483		0.596125	0.942682		0.596125	0.94293
0.67064	0.940882		0.67064	0.942549		0.67064	0.94239		0.67064	0.94717		0.67064	0.943496		0.67064	0.942516		0.67064	0.945685		0.67064	0.943043		0.67064	0.943727		0.67064	0.943831		0.67064	0.941605		0.67064	0.941163		0.67064	0.940367		0.67064	0.93924		0.67064	0.94048
0.745156	0.938521		0.745156	0.939474		0.745156	0.94094		0.745156	0.946103		0.745156	0.941007		0.745156	0.940992		0.745156	0.94246		0.745156	0.939658		0.745156	0.941049		0.745156	0.941783		0.745156	0.938503		0.745156	0.938423		0.745156	0.937862		0.745156	0.936958		0.745156	0.937691
0.819672	0.936725		0.819672	0.937535		0.819672	0.939037		0.819672	0.944442		0.819672	0.939304		0.819672	0.93747		0.819672	0.940001		0.819672	0.93797		0.819672	0.93937		0.819672	0.939432		0.819672	0.937806		0.819672	0.935696		0.819672	0.935196		0.819672	0.93453		0.819672	0.934709
0.894187	0.93492		0.894187	0.93583		0.894187	0.935111		0.894187	0.942413		0.894187	0.93728		0.894187	0.935738		0.894187	0.937581		0.894187	0.934338		0.894187	0.938034		0.894187	0.937355		0.894187	0.935004		0.894187	0.934772		0.894187	0.93315		0.894187	0.931683		0.894187	0.932578
0.968703	0.93283		0.968703	0.933469		0.968703	0.9344		0.968703	0.939871		0.968703	0.935094		0.968703	0.93275		0.968703	0.937973		0.968703	0.933572		0.968703	0.935633		0.968703	0.935236		0.968703	0.932839		0.968703	0.931411		0.968703	0.931171		0.968703	0.930004		0.968703	0.930561
1.04322	0.931643		1.04322	0.931996		1.04322	0.931793		1.04322	0.940471		1.04322	0.933752		1.04322	0.931877		1.04322	0.935927		1.04322	0.932466		1.04322	0.933358		1.04322	0.934139		1.04322	0.93		1.04322	0.929796		1.04322	0.928464		1.04322	0.928865		1.04322	0.928625
1.11773	0.929501		1.11773	0.929168		1.11773	0.930229		1.11773	0.938003		1.11773	0.933001		1.11773	0.929889		1.11773	0.93338		1.11773	0.930714		1.11773	0.932627		1.11773	0.93197		1.11773	0.929061		1.11773	0.92776		1.11773	0.926872		1.11773	0.926084		1.11773	0.926937
1.19225	0.927972		1.19225	0.927981		1.19225	0.929448		1.19225	0.935231		1.19225	0.930354		1.19225	0.928628		1.19225	0.932568		1.19225	0.928285		1.19225	0.930517		1.19225	0.929622		1.19225	0.926913		1.19225	0.926204		1.19225	0.925204		1.19225	0.924817		1.19225	0.926408
1.26677	0.926395		1.26677	0.926016		1.26677	0.927133		1.26677	0.934688		1.26677	0.930014		1.26677	0.927587		1.26677	0.930367		1.26677	0.92667		1.26677	0.928828		1.26677	0.929936		1.26677	0.925691		1.26677	0.924576		1.26677	0.924089		1.26677	0.922959		1.26677	0.923092
1.34128	0.924426		1.34128	0.925375		1.34128	0.925262		1.34128	0.933602		1.34128	0.927681		1.34128	0.926517		1.34128	0.929376		1.34128	0.925116		1.34128	0.927744		1.34128	0.926841		1.34128	0.92423		1.34128	0.922548		1.34128	0.921761		1.34128	0.921562		1.34128	0.921832
1.4158	0.922126		1.4158	0.923369		1.4158	0.924584		1.4158	0.931432		1.4158	0.926505		1.4158	0.924598		1.4158	0.928605		1.4158	0.924381		1.4158	0.926023		1.4158	0.926315		1.4158	0.923028		1.4158	0.920852		1.4158	0.920225		1.4158	0.919322		1.4158	0.919027
1.49031	0.920493		1.49031	0.921696		1.49031	0.922243		1.49031	0.930489		1.49031	0.925496		1.49031	0.922893		1.49031	0.927394		1.49031	0.922785		1.49031	0.924777		1.49031	0.924949		1.49031	0.921363		1.49031	0.919481		1.49031	0.919324		1.49031	0.917883		1.49031	0.918553
1.56483	0.919708		1.56483	0.920176		1.56483	0.921295		1.56483	0.929946		1.56483	0.924378		1.56483	0.921404		1.56483	0.925721		1.56483	0.921284		1.56483	0.923839		1.56483	0.922951		1.56483	0.92043		1.56483	0.917817		1.56483	0.917318		1.56483	0.916705		1.56483	0.917058
1.63934	0.91828		1.63934	0.918507		1.63934	0.919246		1.63934	0.928549		1.63934	0.922547		1.63934	0.920428		1.63934	0.923346		1.63934	0.920588		1.63934	0.922462		1.63934	0.920873		1.63934	0.918498		1.63934	0.916481		1.63934	0.915783		1.63934	0.91544		1.63934	0.915657
1.71386	0.91618		1.71386	0.918371		1.71386	0.917519		1.71386	0.926671		1.71386	0.920906		1.71386	0.918509		1.71386	0.923107		1.71386	0.918731		1.71386	0.921277		1.71386	0.920411		1.71386	0.917839		1.71386	0.915132		1.71386	0.914036		1.71386	0.913651		1.71386	0.913808
1.78837	0.915193		1.78837	0.916538		1.78837	0.916483		1.78837	0.925564		1.78837	0.91966		1.78837	0.917625		1.78837	0.921502		1.78837	0.91676		1.78837	0.919994		1.78837	0.918348		1.78837	0.916043		1.78837	0.913988		1.78837	0.91332		1.78837	0.912263		1.78837	0.912001
1.86289	0.913585		1.86289	0.915704		1.86289	0.915586		1.86289	0.92474		1.86289	0.918235		1.86289	0.915829		1.86289	0.920624		1.86289	0.915795		1.86289	0.919096		1.86289	0.917938		1.86289	0.914887		1.86289	0.913231		1.86289	0.911905		1.86289	0.910675		1.86289	0.910718
1.93741	0.912346		1.93741	0.913602		1.93741	0.91489		1.93741	0.923873		1.93741	0.916603		1.93741	0.914879		1.93741	0.918094		1.93741	0.913863		1.93741	0.918156		1.93741	0.916398		1.93741	0.914004		1.93741	0.911801		1.93741	0.910567		1.93741	0.908933		1.93741	0.909473
2.01192	0.911624		2.01192	0.913265		2.01192	0.913791		2.01192	0.922457		2.01192	0.916099		2.01192	0.914154		2.01192	0.917772		2.01192	0.912996		2.01192	0.916263		2.01192	0.915281		2.01192	0.912324		2.01192	0.909938		2.01192	0.909418		2.01192	0.908449		2.01192	0.909064
2.08644	0.909718		2.08644	0.912097		2.08644	0.911602		2.08644	0.921806		2.08644	0.915305		2.08644	0.912981		2.08644	0.916803		2.08644	0.911531		2.08644	0.914654		2.08644	0.913509		2.08644	0.911116		2.08644	0.909156		2.08644	0.908267		2.08644	0.907259		2.08644	0.90738
2.16095	0.909024		2.16095	0.910549		2.16095	0.911376		2.16095	0.919376		2.16095	0.913851		2.16095	0.911569		2.16095	0.916441		2.16095	0.910818		2.16095	0.913919		2.16095	0.91279		2.16095	0.910345		2.16095	0.908239		2.16095	0.90641		2.16095	0.905063		2.16095	0.905115
2.23547	0.907827		2.23547	0.909971		2.23547	0.910022		2.23547	0.920132		2.23547	0.912872		2.23547	0.911842		2.23547	0.915087		2.23547	0.909291		2.23547	0.912885		2.23547	0.911487		2.23547	0.908985		2.23547	0.906584		2.23547	0.905733		2.23547	0.905134		2.23547	0.904685
2.30998	0.906878		2.30998	0.908611		2.30998	0.908991		2.30998	0.919715		2.30998	0.910841		2.30998	0.909224		2.30998	0.914534		2.30998	0.90853		2.30998	0.911558		2.30998	0.911259		2.30998	0.907817		2.30998	0.905189		2.30998	0.904366		2.30998	0.903269		2.30998	0.903398
2.3845	0.905872		2.3845	0.907628		2.3845	0.907918		2.3845	0.918825		2.3845	0.91135		2.3845	0.909353		2.3845	0.912943		2.3845	0.907925		2.3845	0.911301		2.3845	0.910184		2.3845	0.906933		2.3845	0.905287		2.3845	0.903517		2.3845	0.901828		2.3845	0.902328
2.45901	0.904178		2.45901	0.905814		2.45901	0.906658		2.45901	0.916259		2.45901	0.910158		2.45901	0.906686		2.45901	0.911442		2.45901	0.905949		2.45901	0.91072		2.45901	0.908762		2.45901	0.906263		2.45901	0.90293		2.45901	0.902163		2.45901	0.901001		2.45901	0.90198
2.53353	0.904101		2.53353	0.904396		2.53353	0.904968		2.53353	0.916108		2.53353	0.908692		2.53353	0.906161		2.53353	0.910723		2.53353	0.906303		2.53353	0.908751		2.53353	0.9076		2.53353	0.904472		2.53353	0.902964		2.53353	0.900651		2.53353	0.899989		2.53353	0.899392
2.60805	0.902022		2.60805	0.904648		2.60805	0.904542		2.60805	0.916171		2.60805	0.907867		2.60805	0.904983		2.60805	0.910778		2.60805	0.904179		2.60805	0.908586		2.60805	0.90685		2.60805	0.903345		2.60805	0.900997		2.60805	0.900203		2.60805	0.89875		2.60805	0.899501
2.68256	0.900843		2.68256	0.902722		2.68256	0.903777		2.68256	0.915603		2.68256	0.906821		2.68256	0.903651		2.68256	0.908854		2.68256	0.903144		2.68256	0.906964		2.68256	0.906473		2.68256	0.902422		2.68256	0.900538		2.68256	0.899146		2.68256	0.897181		2.68256	0.897857
2.75708	0.900027		2.75708	0.903127		2.75708	0.902598		2.75708	0.914127		2.75708	0.905805		2.75708	0.903881		2.75708	0.908075		2.75708	0.902554		2.75708	0.906351		2.75708	0.905197		2.75708	0.901152		2.75708	0.899594		2.75708	0.898077		2.75708	0.895797		2.75708	0.897359
2.83159	0.898841		2.83159	0.902309		2.83159	0.902071		2.83159	0.913316		2.83159	0.904573		2.83159	0.902855		2.83159	0.907		2.83159	0.901228		2.83159	0.90557		2.83159	0.904095		2.83159	0.901061		2.83159	0.898398		2.83159	0.896745		2.83159	0.89541		2.83159	0.895856
2.90611	0.898424		2.90611	0.90108		2.90611	0.900432		2.90611	0.913322		2.90611	0.904057		2.90611	0.901433		2.90611	0.906951		2.90611	0.900588		2.90611	0.904357		2.90611	0.902627		2.90611	0.899413		2.90611	0.896954		2.90611	0.896525		2.90611	0.894324		2.90611	0.895344
2.98062	0.898865		2.98062	0.899737		2.98062	0.899998		2.98062	0.912094		2.98062	0.903602		2.98062	0.901054		2.98062	0.904802		2.98062	0.899764		2.98062	0.903153		2.98062	0.902115		2.98062	0.898232		2.98062	0.895694		2.98062	0.89479		2.98062	0.892897		2.98062	0.89313
3.05514	0.897001		3.05514	0.899576		3.05514	0.898827		3.05514	0.912219		3.05514	0.902115		3.05514	0.900042		3.05514	0.904146		3.05514	0.898824		3.05514	0.902374		3.05514	0.901477		3.05514	0.897209		3.05514	0.894663		3.05514	0.893017		3.05514	0.892926		3.05514	0.892422
3.12966	0.896001		3.12966	0.897901		3.12966	0.89791		3.12966	0.910393		3.12966	0.901496		3.12966	0.899219		3.12966	0.9038		3.12966	0.897981		3.12966	0.902243		3.12966	0.900589		3.12966	0.896375		3.12966	0.894681		3.12966	0.892982		3.12966	0.890403		3.12966	0.891983
3.20417	0.895219		3.20417	0.897598		3.20417	0.89698		3.20417	0.908881		3.20417	0.901027		3.20417	0.899292		3.20417	0.903377		3.20417	0.89678		3.20417	0.901824		3.20417	0.900142		3.20417	0.895768		3.20417	0.893186		3.20417	0.892387		3.20417	0.890988		3.20417	0.890822
3.27869	0.894613		3.27869	0.89657		3.27869	0.896931		3.27869	0.908555		3.27869	0.900449		3.27869	0.897886		3.27869	0.90324		3.27869	0.897041		3.27869	0.900905		3.27869	0.899247		3.27869	0.894818		3.27869	0.892896		3.27869	0.891489		3.27869	0.889879		3.27869	0.889679
3.3532	0.893618		3.3532	0.89582		3.3532	0.896003		3.3532	0.907243		3.3532	0.898939		3.3532	0.896651		3.3532	0.902366		3.3532	0.89467		3.3532	0.900376		3.3532	0.898751		3.3532	0.893488		3.3532	0.89179		3.3532	0.890457		3.3532	0.889037		3.3532	0.888799
3.42772	0.892052		3.42772	0.894988		3.42772	0.895006		3.42772	0.907233		3.42772	0.897798		3.42772	0.896509		3.42772	0.901115		3.42772	0.894923		3.42772	0.898686		3.42772	0.898134		3.42772	0.89394		3.42772	0.890668		3.42772	0.890008		3.42772	0.887991		3.42772	0.888142
3.50223	0.892526		3.50223	0.894131		3.50223	0.893924		3.50223	0.907522		3.50223	0.898051		3.50223	0.895037		3.50223	0.901413		3.50223	0.893337		3.50223	0.898005		3.50223	0.896927		3.50223	0.892706		3.50223	0.889849		3.50223	0.888659		3.50223	0.886522		3.50223	0.887025
3.57675	0.890145		3.57675	0.89307		3.57675	0.89447		3.57675	0.907015		3.57675	0.897251		3.57675	0.894349		3.57675	0.899548		3.57675	0.893718		3.57675	0.897021		3.57675	0.89727		3.57675	0.891737		3.57675	0.889329		3.57675	0.887642		3.57675	0.886706		3.57675	0.886579
3.65126	0.889678		3.65126	0.892889		3.65126	0.892389		3.65126	0.90617		3.65126	0.896164		3.65126	0.893588		3.65126	0.899872		3.65126	0.892577		3.65126	0.896092		3.65126	0.896186		3.65126	0.891185		3.65126	0.888506		3.65126	0.886623		3.65126	0.88577		3.65126	0.885133
3.72578	0.890762		3.72578	0.891321		3.72578	0.890979		3.72578	0.904741		3.72578	0.895763		3.72578	0.892872		3.72578	0.897299		3.72578	0.891104		3.72578	0.8957		3.72578	0.893951		3.72578	0.890848		3.72578	0.88795		3.72578	0.885655		3.72578	0.884495		3.72578	0.884986
3.8003	0.889252		3.8003	0.892067		3.8003	0.8911		3.8003	0.904852		3.8003	0.895324		3.8003	0.892305		3.8003	0.896702		3.8003	0.891086		3.8003	0.894483		3.8003	0.894323		3.8003	0.889708		3.8003	0.885931		3.8003	0.885775		3.8003	0.883868		3.8003	0.884252
3.87481	0.887917		3.87481	0.890046		3.87481	0.890841		3.87481	0.9041		3.87481	0.893081		3.87481	0.891423		3.87481	0.897858		3.87481	0.891185		3.87481	0.894837		3.87481	0.893942		3.87481	0.889264		3.87481	0.886192		3.87481	0.884475		3.87481	0.882701		3.87481	0.883055
3.94933	0.887048		3.94933	0.888571		3.94933	0.890323		3.94933	0.903749		3.94933	0.893937		3.94933	0.890884		3.94933	0.896271		3.94933	0.889713		3.94933	0.894295		3.94933	0.892373		3.94933	0.887729		3.94933	0.885642		3.94933	0.884108		3.94933	0.882827		3.94933	0.882784
4.02384	0.886654		4.02384	0.888186		4.02384	0.88803		4.02384	0.902646		4.02384	0.892787		4.02384	0.890136		4.02384	0.896537		4.02384	0.888965		4.02384	0.893159		4.02384	0.89289		4.02384	0.887754		4.02384	0.88455		4.02384	0.882948		4.02384	0.881638		4.02384	0.881644
4.09836	0.886617		4.09836	0.887545		4.09836	0.888471		4.09836	0.901999		4.09836	0.892383		4.09836	0.890018		4.09836	0.896129		4.09836	0.887827		4.09836	0.893296		4.09836	0.891298		4.09836	0.886684		4.09836	0.884079		4.09836	0.882631		4.09836	0.880962		4.09836	0.880182
4.17287	0.884999		4.17287	0.887028		4.17287	0.888669		4.17287	0.900613		4.17287	0.890909		4.17287	0.888026		4.17287	0.894366		4.17287	0.887795		4.17287	0.891628		4.17287	0.890189		4.17287	0.885665		4.17287	0.882381		4.17287	0.882052		4.17287	0.879225		4.17287	0.880276
4.24739	0.884258		4.24739	0.886923		4.24739	0.88695		4.24739	0.901236		4.24739	0.891281		4.24739	0.887899		4.24739	0.894332		4.24739	0.887169		4.24739	0.891977		4.24739	0.890714		4.24739	0.885585		4.24739	0.882004		4.24739	0.880645		4.24739	0.879135		4.24739	0.8786
4.3219	0.88514		4.3219	0.885801		4.3219	0.886059		4.3219	0.901026		4.3219	0.890597		4.3219	0.887847		4.3219	0.893943		4.3219	0.886112		4.3219	0.890571		4.3219	0.891097		4.3219	0.883572		4.3219	0.881127		4.3219	0.880402		4.3219	0.87979		4.3219	0.878676
4.39642	0.883463		4.39642	0.886037		4.39642	0.886515		4.39642	0.900208		4.39642	0.890595		4.39642	0.887271		4.39642	0.893311		4.39642	0.886021		4.39642	0.889215		4.39642	0.888367		4.39642	0.88329		4.39642	0.881112		4.39642	0.879584		4.39642	0.877989		4.39642	0.878245
4.47094	0.882505		4.47094	0.885374		4.47094	0.885903		4.47094	0.899561		4.47094	0.888968		4.47094	0.886428		4.47094	0.892405		4.47094	0.884947		4.47094	0.890166		4.47094	0.88907		4.47094	0.882948		4.47094	0.880986		4.47094	0.879294		4.47094	0.877663		4.47094	0.877448
4.54545	0.882071		4.54545	0.883891		4.54545	0.884889		4.54545	0.899235		4.54545	0.888959		4.54545	0.886639		4.54545	0.892812		4.54545	0.884008		4.54545	0.889364		4.54545	0.887948		4.54545	0.882616		4.54545	0.879564		4.54545	0.877936		4.54545	0.875555		4.54545	0.876057
4.61997	0.88146		4.61997	0.882465		4.61997	0.883395		4.61997	0.900082		4.61997	0.887352		4.61997	0.884698		4.61997	0.892308		4.61997	0.883773		4.61997	0.888113		4.61997	0.886841		4.61997	0.88229		4.61997	0.879503		4.61997	0.876762		4.61997	0.875971		4.61997	0.875416
4.69448	0.880881		4.69448	0.882529		4.69448	0.883937		4.69448	0.89823		4.69448	0.887756		4.69448	0.884344		4.69448	0.892284		4.69448	0.883185		4.69448	0.887415		4.69448	0.88612		4.69448	0.882195		4.69448	0.878778		4.69448	0.877722		4.69448	0.874932		4.69448	0.875539
4.769	0.879628		4.769	0.882643		4.769	0.883018		4.769	0.8984		4.769	0.886752		4.769	0.884221		4.769	0.890757		4.769	0.881792		4.769	0.887915		4.769	0.885479		4.769	0.880933		4.769	0.877741		4.769	0.875844		4.769	0.873806		4.769	0.874347
4.84351	0.880529		4.84351	0.882284		4.84351	0.883477		4.84351	0.89662		4.84351	0.886655		4.84351	0.884054		4.84351	0.89087		4.84351	0.881802		4.84351	0.88665		4.84351	0.885357		4.84351	0.879754		4.84351	0.876699		4.84351	0.874991		4.84351	0.873796		4.84351	0.874412
4.91803	0.878936		4.91803	0.882428		4.91803	0.882082		4.91803	0.897233		4.91803	0.885936		4.91803	0.88225		4.91803	0.889785		4.91803	0.881406		4.91803	0.885642		4.91803	0.885411		4.91803	0.87964		4.91803	0.877075		4.91803	0.874484		4.91803	0.873736		4.91803	0.873366
4.99255	0.878338		4.99255	0.881829		4.99255	0.881659		4.99255	0.896878		4.99255	0.885432		4.99255	0.881876		4.99255	0.890002		4.99255	0.880702		4.99255	0.886128		4.99255	0.884381		4.99255	0.878803		4.99255	0.876604		4.99255	0.874671		4.99255	0.873		4.99255	0.873262
5.06706	0.878383		5.06706	0.881643		5.06706	0.881078		5.06706	0.896471		5.06706	0.884195		5.06706	0.881676		5.06706	0.888427		5.06706	0.88062		5.06706	0.885622		5.06706	0.884286		5.06706	0.878774		5.06706	0.875373		5.06706	0.873326		5.06706	0.871842		5.06706	0.872466
5.14158	0.878179		5.14158	0.879759		5.14158	0.880332		5.14158	0.895242		5.14158	0.884463		5.14158	0.881432		5.14158	0.888307		5.14158	0.879496		5.14158	0.884716		5.14158	0.883114		5.14158	0.878046		5.14158	0.875416		5.14158	0.873096		5.14158	0.871375		5.14158	0.871889
5.21609	0.876854		5.21609	0.879347		5.21609	0.8804		5.21609	0.89474		5.21609	0.884201		5.21609	0.880737		5.21609	0.887207		5.21609	0.879334		5.21609	0.884019		5.21609	0.883432		5.21609	0.877192		5.21609	0.873872		5.21609	0.872842		5.21609	0.871363		5.21609	0.871103
5.29061	0.876479		5.29061	0.879448		5.29061	0.878995		5.29061	0.894842		5.29061	0.884098		5.29061	0.880114		5.29061	0.887078		5.29061	0.878262		5.29061	0.882671		5.29061	0.881969		5.29061	0.877554		5.29061	0.87424		5.29061	0.872409		5.29061	0.870689		5.29061	0.869553
5.36512	0.875287		5.36512	0.878148		5.36512	0.879201		5.36512	0.894429		5.36512	0.882726		5.36512	0.880582		5.36512	0.886947		5.36512	0.878403		5.36512	0.882653		5.36512	0.881937		5.36512	0.876348		5.36512	0.873051		5.36512	0.871574		5.36512	0.869617		5.36512	0.868778
5.43964	0.875423		5.43964	0.877268		5.43964	0.879015		5.43964	0.89409		5.43964	0.882298		5.43964	0.879884		5.43964	0.886017		5.43964	0.877838		5.43964	0.883339		5.43964	0.881719		5.43964	0.876118		5.43964	0.872334		5.43964	0.871468		5.43964	0.868531		5.43964	0.868316
5.51415	0.875759		5.51415	0.877478		5.51415	0.878661		5.51415	0.892855		5.51415	0.881391		5.51415	0.879007		5.51415	0.884861		5.51415	0.87633		5.51415	0.883251		5.51415	0.879811		5.51415	0.875954		5.51415	0.871627		5.51415	0.870654		5.51415	0.868318		5.51415	0.868778
5.58867	0.874299		5.58867	0.87622		5.58867	0.877398		5.58867	0.893102		5.58867	0.881908		5.58867	0.878446		5.58867	0.885562		5.58867	0.876289		5.58867	0.881828		5.58867	0.879728		5.58867	0.874889		5.58867	0.87052		5.58867	0.869345		5.58867	0.867552		5.58867	0.86784
5.66319	0.873785		5.66319	0.876751		5.66319	0.875817		5.66319	0.891774		5.66319	0.881339		5.66319	0.877554		5.66319	0.884667		5.66319	0.876623		5.66319	0.88098		5.66319	0.878713		5.66319	0.874181		5.66319	0.870726		5.66319	0.869249		5.66319	0.867271		5.66319	0.866597
5.7377	0.873365		5.7377	0.876483		5.7377	0.876534		5.7377	0.89207		5.7377	0.880299		5.7377	0.877053		5.7377	0.883858		5.7377	0.875864		5.7377	0.881079		5.7377	0.879189		5.7377	0.874387		5.7377	0.870462		5.7377	0.868858		5.7377	0.866886		5.7377	0.867087
5.81222	0.873536		5.81222	0.875672		5.81222	0.875757		5.81222	0.890909		5.81222	0.880795		5.81222	0.877496		5.81222	0.884458		5.81222	0.875207		5.81222	0.881306		5.81222	0.878332		5.81222	0.874038		5.81222	0.869824		5.81222	0.868601		5.81222	0.866211		5.81222	0.866113
5.88673	0.872969		5.88673	0.87521		5.88673	0.874803		5.88673	0.891097		5.88673	0.879562		5.88673	0.87643		5.88673	0.88325		5.88673	0.875063		5.88673	0.879695		5.88673	0.878357		5.88673	0.872903		5.88673	0.8697		5.88673	0.867889		5.88673	0.865322		5.88673	0.865373
5.96125	0.872339		5.96125	0.874079		5.96125	0.875233		5.96125	0.890409		5.96125	0.880156		5.96125	0.876009		5.96125	0.883805		5.96125	0.874595		5.96125	0.879759		5.96125	0.877746		5.96125	0.872201		5.96125	0.868315		5.96125	0.866948		5.96125	0.86506		5.96125	0.864765
6.03576	0.87185		6.03576	0.87446		6.03576	0.874018		6.03576	0.89106		6.03576	0.877874		6.03576	0.875656		6.03576	0.882212		6.03576	0.874072		6.03576	0.878686		6.03576	0.87665		6.03576	0.872553		6.03576	0.868034		6.03576	0.867163		6.03576	0.864587		6.03576	0.864897
6.11028	0.870785		6.11028	0.87419		6.11028	0.873537		6.11028	0.89039		6.11028	0.877966		6.11028	0.876022		6.11028	0.881179		6.11028	0.872933		6.11028	0.879032		6.11028	0.877		6.11028	0.872196		6.11028	0.867867		6.11028	0.865877		6.11028	0.86401		6.11028	0.864144
6.18479	0.87093		6.18479	0.873548		6.18479	0.873447		6.18479	0.889389		6.18479	0.878296		6.18479	0.875414		6.18479	0.88121		6.18479	0.873135		6.18479	0.878113		6.18479	0.876021		6.18479	0.870591		6.18479	0.867908		6.18479	0.86575		6.18479	0.86345		6.18479	0.864707
6.25931	0.870052		6.25931	0.873336		6.25931	0.872919		6.25931	0.889248		6.25931	0.878163		6.25931	0.874866		6.25931	0.881777		6.25931	0.871966		6.25931	0.877585		6.25931	0.876226		6.25931	0.87157		6.25931	0.866994		6.25931	0.865838		6.25931	0.86306		6.25931	0.863535
6.33383	0.870626		6.33383	0.871891		6.33383	0.873222		6.33383	0.889185		6.33383	0.877077		6.33383	0.873625		6.33383	0.880851		6.33383	0.871619		6.33383	0.877485		6.33383	0.875553		6.33383	0.870237		6.33383	0.86694		6.33383	0.864513		6.33383	0.862732		6.33383	0.863417
6.40834	0.868929		6.40834	0.872256		6.40834	0.873135		6.40834	0.888099		6.40834	0.876839		6.40834	0.873017		6.40834	0.879753		6.40834	0.871029		6.40834	0.877272		6.40834	0.876121		6.40834	0.870147		6.40834	0.866486		6.40834	0.864823		6.40834	0.863603		6.40834	0.862675
6.48286	0.868765		6.48286	0.871486		6.48286	0.871994		6.48286	0.88868		6.48286	0.876575		6.48286	0.87372		6.48286	0.87989		6.48286	0.870512		6.48286	0.876093		6.48286	0.874707		6.48286	0.870045		6.48286	0.865741		6.48286	0.864011		6.48286	0.862352		6.48286	0.86243
6.55737	0.868488		6.55737	0.870693		6.55737	0.871544		6.55737	0.887166		6.55737	0.876516		6.55737	0.872458		6.55737	0.8789		6.55737	0.870757		6.55737	0.876199		6.55737	0.87473		6.55737	0.869857		6.55737	0.864368		6.55737	0.864069		6.55737	0.862001		6.55737	0.861631
6.63189	0.868935		6.63189	0.871008		6.63189	0.870901		6.63189	0.887639		6.63189	0.875858		6.63189	0.871609		6.63189	0.879224		6.63189	0.87051		6.63189	0.875504		6.63189	0.874028		6.63189	0.868723		6.63189	0.865088		6.63189	0.863592		6.63189	0.861945		6.63189	0.861196
6.7064	0.867446		6.7064	0.871078		6.7064	0.870345		6.7064	0.8877		6.7064	0.875864		6.7064	0.871308		6.7064	0.878338		6.7064	0.870346		6.7064	0.874672		6.7064	0.873648		6.7064	0.868629		6.7064	0.86357		6.7064	0.862554		6.7064	0.861336		6.7064	0.860225
6.78092	0.868001		6.78092	0.86945		6.78092	0.869265		6.78092	0.887181		6.78092	0.874699		6.78092	0.870876		6.78092	0.877816		6.78092	0.869902		6.78092	0.874626		6.78092	0.872854		6.78092	0.868705		6.78092	0.863869		6.78092	0.862543		6.78092	0.860636		6.78092	0.860766
6.85544	0.867892		6.85544	0.868851		6.85544	0.870448		6.85544	0.887398		6.85544	0.875275		6.85544	0.870406		6.85544	0.877367		6.85544	0.869177		6.85544	0.874594		6.85544	0.873174		6.85544	0.867719		6.85544	0.863425		6.85544	0.861975		6.85544	0.860586		6.85544	0.859278
6.92995	0.86665		6.92995	0.869253		6.92995	0.869428		6.92995	0.887		6.92995	0.875434		6.92995	0.87044		6.92995	0.877943		6.92995	0.868882		6.92995	0.873263		6.92995	0.872001		6.92995	0.867363		6.92995	0.862993		6.92995	0.861556		6.92995	0.859781		6.92995	0.859391
7.00447	0.86686		7.00447	0.868989		7.00447	0.868841		7.00447	0.886129		7.00447	0.873607		7.00447	0.87044		7.00447	0.877985		7.00447	0.869394		7.00447	0.873887		7.00447	0.871125		7.00447	0.866887		7.00447	0.863645		7.00447	0.861706		7.00447	0.85859		7.00447	0.858507
7.07898	0.865935		7.07898	0.868101		7.07898	0.868134		7.07898	0.88614		7.07898	0.87428		7.07898	0.869984		7.07898	0.877121		7.07898	0.866924		7.07898	0.874038		7.07898	0.870866		7.07898	0.866895		7.07898	0.863129		7.07898	0.8607		7.07898	0.858688		7.07898	0.858846
7.1535	0.866172		7.1535	0.868744		7.1535	0.868878		7.1535	0.884885		7.1535	0.873782		7.1535	0.869593		7.1535	0.877252		7.1535	0.867348		7.1535	0.872803		7.1535	0.870757		7.1535	0.865629		7.1535	0.862707		7.1535	0.860624		7.1535	0.858352		7.1535	0.858166
7.22801	0.865175		7.22801	0.867712		7.22801	0.868488		7.22801	0.885286		7.22801	0.873096		7.22801	0.868435		7.22801	0.876181		7.22801	0.866769		7.22801	0.873334		7.22801	0.870371		7.22801	0.86526		7.22801	0.861451		7.22801	0.859639		7.22801	0.85818		7.22801	0.857784
7.30253	0.864953		7.30253	0.866945		7.30253	0.868457		7.30253	0.88523		7.30253	0.872565		7.30253	0.869597		7.30253	0.875675		7.30253	0.867063		7.30253	0.872864		7.30253	0.870653		7.30253	0.86552		7.30253	0.86165		7.30253	0.859921		7.30253	0.857181		7.30253	0.857499
7.37704	0.864233		7.37704	0.866313		7.37704	0.867466		7.37704	0.884543		7.37704	0.872998		7.37704	0.868981		7.37704	0.876012		7.37704	0.866847		7.37704	0.871781		7.37704	0.87105		7.37704	0.865225		7.37704	0.860286		7.37704	0.859522		7.37704	0.856517		7.37704	0.856791
7.45156	0.863799		7.45156	0.866756		7.45156	0.866738		7.45156	0.883957		7.45156	0.871546		7.45156	0.867582		7.45156	0.875563		7.45156	0.866442		7.45156	0.871499		7.45156	0.870597		7.45156	0.864832		7.45156	0.861075		7.45156	0.858762		7.45156	0.85698		7.45156	0.856384
7.52608	0.862484		7.52608	0.865619		7.52608	0.866532		7.52608	0.883727		7.52608	0.871759		7.52608	0.867689		7.52608	0.875633		7.52608	0.865356		7.52608	0.871272		7.52608	0.869357		7.52608	0.864755		7.52608	0.860173		7.52608	0.858281		7.52608	0.855536		7.52608	0.8564
7.60059	0.863233		7.60059	0.866451		7.60059	0.866147		7.60059	0.883244		7.60059	0.871767		7.60059	0.868716		7.60059	0.875132		7.60059	0.865746		7.60059	0.871482		7.60059	0.869091		7.60059	0.864325		7.60059	0.859922		7.60059	0.857707		7.60059	0.855805		7.60059	0.856487
7.67511	0.863749		7.67511	0.86588		7.67511	0.865652		7.67511	0.883678		7.67511	0.871005		7.67511	0.867244		7.67511	0.874717		7.67511	0.865376		7.67511	0.870289		7.67511	0.868778		7.67511	0.864352		7.67511	0.85881		7.67511	0.857507		7.67511	0.856454		7.67511	0.855646
7.74962	0.862847		7.74962	0.865172		7.74962	0.865722		7.74962	0.883359		7.74962	0.871129		7.74962	0.867528		7.74962	0.874014		7.74962	0.864637		7.74962	0.870772		7.74962	0.868963		7.74962	0.862959		7.74962	0.859019		7.74962	0.85733		7.74962	0.85532		7.74962	0.854877
7.82414	0.862145		7.82414	0.864997		7.82414	0.865182		7.82414	0.883646		7.82414	0.870389		7.82414	0.866846		7.82414	0.873663		7.82414	0.864044		7.82414	0.870403		7.82414	0.867828		7.82414	0.863117		7.82414	0.858823		7.82414	0.857577		7.82414	0.854883		7.82414	0.854901
7.89865	0.862523		7.89865	0.864991		7.89865	0.865407		7.89865	0.882224		7.89865	0.869878		7.89865	0.866473		7.89865	0.874646		7.89865	0.863793		7.89865	0.870204		7.89865	0.867748		7.89865	0.862859		7.89865	0.859308		7.89865	0.856253		7.89865	0.855183		7.89865	0.854452
7.97317	0.86171		7.97317	0.864673		7.97317	0.863938		7.97317	0.883274		7.97317	0.870143		7.97317	0.865759		7.97317	0.873748		7.97317	0.862462		7.97317	0.868679		7.97317	0.869152		7.97317	0.862147		7.97317	0.858837		7.97317	0.856376		7.97317	0.853648		7.97317	0.85413
8.04768	0.861042		8.04768	0.864039		8.04768	0.863385		8.04768	0.880855		8.04768	0.869954		8.04768	0.866386		8.04768	0.873682		8.04768	0.862907		8.04768	0.869339		8.04768	0.867359		8.04768	0.861914		8.04768	0.858015		8.04768	0.856089		8.04768	0.853945		8.04768	0.853833
8.1222	0.861101		8.1222	0.863351		8.1222	0.86457		8.1222	0.881402		8.1222	0.869518		8.1222	0.865419		8.1222	0.874264		8.1222	0.862079		8.1222	0.868501		8.1222	0.867779		8.1222	0.861655		8.1222	0.857607		8.1222	0.855291		8.1222	0.853342		8.1222	0.85366
8.19672	0.861306		8.19672	0.863637		8.19672	0.86455		8.19672	0.881919		8.19672	0.86934		8.19672	0.86471		8.19672	0.872485		8.19672	0.863152		8.19672	0.868602		8.19672	0.866737		8.19672	0.860797		8.19672	0.857013		8.19672	0.856088		8.19672	0.852745		8.19672	0.853504
8.27123	0.859544		8.27123	0.862996		8.27123	0.863732		8.27123	0.881442		8.27123	0.868115		8.27123	0.864289		8.27123	0.873073		8.27123	0.862071		8.27123	0.868099		8.27123	0.865957		8.27123	0.861659		8.27123	0.857035		8.27123	0.855111		8.27123	0.852652		8.27123	0.852276
8.34575	0.859867		8.34575	0.862908		8.34575	0.86383		8.34575	0.880608		8.34575	0.869044		8.34575	0.864764		8.34575	0.87223		8.34575	0.862852		8.34575	0.867325		8.34575	0.866163		8.34575	0.860406		8.34575	0.857095		8.34575	0.85452		8.34575	0.852686		8.34575	0.852237
8.42026	0.859997		8.42026	0.863274		8.42026	0.863445		8.42026	0.881594		8.42026	0.868829		8.42026	0.864516		8.42026	0.872771		8.42026	0.861654		8.42026	0.867507		8.42026	0.866388		8.42026	0.860067		8.42026	0.855891		8.42026	0.853278		8.42026	0.852219		8.42026	0.852352
8.49478	0.85958		8.49478	0.862329		8.49478	0.862567		8.49478	0.879905		8.49478	0.868171		8.49478	0.863874		8.49478	0.871482		8.49478	0.861162		8.49478	0.867271		8.49478	0.866607		8.49478	0.860907		8.49478	0.856164		8.49478	0.854666		8.49478	0.85086		8.49478	0.851242
8.56929	0.859372		8.56929	0.862455		8.56929	0.862683		8.56929	0.880478		8.56929	0.867722		8.56929	0.863511		8.56929	0.871712		8.56929	0.860457		8.56929	0.867246		8.56929	0.865524		8.56929	0.859751		8.56929	0.85597		8.56929	0.853679		8.56929	0.851551		8.56929	0.8513
8.64381	0.858539		8.64381	0.861598		8.64381	0.862771		8.64381	0.880341		8.64381	0.867408		8.64381	0.863266		8.64381	0.871333		8.64381	0.860885		8.64381	0.866277		8.64381	0.865425		8.64381	0.860072		8.64381	0.85536		8.64381	0.853892		8.64381	0.850564		8.64381	0.850728
8.71833	0.858683		8.71833	0.86162		8.71833	0.862134		8.71833	0.880094		8.71833	0.867534		8.71833	0.86315		8.71833	0.870526		8.71833	0.860982		8.71833	0.866771		8.71833	0.864692		8.71833	0.859625		8.71833	0.856031		8.71833	0.853599		8.71833	0.851204		8.71833	0.851225
8.79284	0.858045		8.79284	0.860646		8.79284	0.861646		8.79284	0.880195		8.79284	0.866877		8.79284	0.862918		8.79284	0.871031		8.79284	0.859835		8.79284	0.866057		8.79284	0.865053		8.79284	0.858757		8.79284	0.854522		8.79284	0.852898		8.79284	0.849706		8.79284	0.849985
8.86736	0.857837		8.86736	0.861283		8.86736	0.861479		8.86736	0.879952		8.86736	0.86593		8.86736	0.861937		8.86736	0.870365		8.86736	0.859817		8.86736	0.865662		8.86736	0.864783		8.86736	0.859014		8.86736	0.854095		8.86736	0.852918		8.86736	0.850025		8.86736	0.849946
8.94187	0.858644		8.94187	0.860273		8.94187	0.861652		8.94187	0.879705		8.94187	0.86677		8.94187	0.862111		8.94187	0.868808		8.94187	0.859686		8.94187	0.86576		8.94187	0.864616		8.94187	0.859322		8.94187	0.854009		8.94187	0.851424		8.94187	0.849286		8.94187	0.850446
9.01639	0.857601		9.01639	0.860621		9.01639	0.861953		9.01639	0.879537		9.01639	0.866656		9.01639	0.86267		9.01639	0.870645		9.01639	0.860361		9.01639	0.865766		9.01639	0.864431		9.01639	0.859035		9.01639	0.854514		9.01639	0.852187		9.01639	0.850261		9.01639	0.848988
9.0909	0.85709		9.0909	0.861478		9.0909	0.860904		9.0909	0.879515		9.0909	0.865633		9.0909	0.861465		9.0909	0.869352		9.0909	0.860123		9.0909	0.865674		9.0909	0.863775		9.0909	0.857985		9.0909	0.854281		9.0909	0.852313		9.0909	0.849679		9.0909	0.849616
9.16542	0.857079		9.16542	0.860086		9.16542	0.860162		9.16542	0.879224		9.16542	0.865506		9.16542	0.860599		9.16542	0.869926		9.16542	0.858495		9.16542	0.865092		9.16542	0.864307		9.16542	0.857517		9.16542	0.853478		9.16542	0.851322		9.16542	0.848959		9.16542	0.848835
9.23993	0.856724		9.23993	0.859754		9.23993	0.859876		9.23993	0.879047		9.23993	0.864991		9.23993	0.86057		9.23993	0.868754		9.23993	0.858516		9.23993	0.864057		9.23993	0.864093		9.23993	0.857645		9.23993	0.852632		9.23993	0.851376		9.23993	0.848889		9.23993	0.849101
9.31445	0.856305		9.31445	0.859035		9.31445	0.861137		9.31445	0.880139		9.31445	0.865067		9.31445	0.861073		9.31445	0.86888		9.31445	0.85879		9.31445	0.865011		9.31445	0.863099		9.31445	0.857856		9.31445	0.85258		9.31445	0.851123		9.31445	0.848787		9.31445	0.84852
9.38897	0.85671		9.38897	0.85769		9.38897	0.859336		9.38897	0.878206		9.38897	0.865432		9.38897	0.860261		9.38897	0.868905		9.38897	0.858593		9.38897	0.863311		9.38897	0.863114		9.38897	0.856537		9.38897	0.85188		9.38897	0.84998		9.38897	0.84925		9.38897	0.84949
9.46348	0.855825		9.46348	0.858988		9.46348	0.859663		9.46348	0.878425		9.46348	0.864851		9.46348	0.861003		9.46348	0.868427		9.46348	0.857438		9.46348	0.863003		9.46348	0.863204		9.46348	0.856754		9.46348	0.852458		9.46348	0.850179		9.46348	0.848119		9.46348	0.848708
9.538	0.854593		9.538	0.858771		9.538	0.859191		9.538	0.87794		9.538	0.864963		9.538	0.860732		9.538	0.868784		9.538	0.858537		9.538	0.864204		9.538	0.862361		9.538	0.856579		9.538	0.852184		9.538	0.850618		9.538	0.847858		9.538	0.848387
9.61251	0.856388		9.61251	0.858973		9.61251	0.859086		9.61251	0.877565		9.61251	0.864704		9.61251	0.860259		9.61251	0.8679		9.61251	0.858082		9.61251	0.862953		9.61251	0.862312		9.61251	0.856031		9.61251	0.852707		9.61251	0.849654		9.61251	0.847701		9.61251	0.847671
9.68703	0.854176		9.68703	0.859144		9.68703	0.858732		9.68703	0.876294		9.68703	0.865217		9.68703	0.860358		9.68703	0.868685		9.68703	0.85672		9.68703	0.863124		9.68703	0.862224		9.68703	0.855994		9.68703	0.85139		9.68703	0.849741		9.68703	0.847011		9.68703	0.847348
9.76154	0.855646		9.76154	0.858662		9.76154	0.858994		9.76154	0.877026		9.76154	0.863417		9.76154	0.858976		9.76154	0.8668		9.76154	0.857026		9.76154	0.863107		9.76154	0.861922		9.76154	0.855914		9.76154	0.851069		9.76154	0.848178		9.76154	0.847112		9.76154	0.846804
9.83606	0.853905		9.83606	0.858254		9.83606	0.858464		9.83606	0.877243		9.83606	0.864121		9.83606	0.859068		9.83606	0.86824		9.83606	0.85685		9.83606	0.86276		9.83606	0.861119		9.83606	0.856079		9.83606	0.851546		9.83606	0.849607		9.83606	0.846909		9.83606	0.846874
9.91057	0.854808		9.91057	0.858178		9.91057	0.85826		9.91057	0.876864		9.91057	0.863561		9.91057	0.859373		9.91057	0.867241		9.91057	0.856498		9.91057	0.862744		9.91057	0.861753		9.91057	0.855237		9.91057	0.85013		9.91057	0.848136		9.91057	0.846381		9.91057	0.846969
9.98509	0.85386		9.98509	0.858324		9.98509	0.858757		9.98509	0.876856		9.98509	0.862341		9.98509	0.859161		9.98509	0.866472		9.98509	0.856842		9.98509	0.861498		9.98509	0.861322		9.98509	0.85481		9.98509	0.85073		9.98509	0.848822		9.98509	0.845765		9.98509	0.847282
10.0596	0.855032		10.0596	0.85735		10.0596	0.857765		10.0596	0.87738		10.0596	0.862292		10.0596	0.858735		10.0596	0.866148		10.0596	0.856887		10.0596	0.86249		10.0596	0.861171		10.0596	0.855113		10.0596	0.850848		10.0596	0.848256		10.0596	0.845948		10.0596	0.84631
10.1341	0.854244		10.1341	0.857272		10.1341	0.85658		10.1341	0.87637		10.1341	0.862835		10.1341	0.858509		10.1341	0.866468		10.1341	0.856418		10.1341	0.862134		10.1341	0.860269		10.1341	0.855259		10.1341	0.850126		10.1341	0.848172		10.1341	0.845442		10.1341	0.846422
10.2086	0.85351		10.2086	0.857453		10.2086	0.857485		10.2086	0.877162		10.2086	0.862751		10.2086	0.857942		10.2086	0.865809		10.2086	0.856392		10.2086	0.862101		10.2086	0.861076		10.2086	0.85478		10.2086	0.849727		10.2086	0.847821		10.2086	0.846405		10.2086	0.845952
10.2832	0.853779		10.2832	0.856512		10.2832	0.856327		10.2832	0.876345		10.2832	0.861989		10.2832	0.858524		10.2832	0.866675		10.2832	0.856279		10.2832	0.861526		10.2832	0.860249		10.2832	0.854445		10.2832	0.850043		10.2832	0.8481		10.2832	0.845627		10.2832	0.84544
10.3577	0.853607		10.3577	0.856783		10.3577	0.856351		10.3577	0.876681		10.3577	0.861786		10.3577	0.857566		10.3577	0.865233		10.3577	0.855107		10.3577	0.862096		10.3577	0.860292		10.3577	0.854122		10.3577	0.849835		10.3577	0.847666		10.3577	0.846105		10.3577	0.845271
10.4322	0.853734		10.4322	0.855653		10.4322	0.857025		10.4322	0.87624		10.4322	0.8621		10.4322	0.857882		10.4322	0.865068		10.4322	0.855492		10.4322	0.861403		10.4322	0.860001		10.4322	0.853759		10.4322	0.84952		10.4322	0.847432		10.4322	0.844887		10.4322	0.845626
10.5067	0.85308		10.5067	0.856419		10.5067	0.855766		10.5067	0.875687		10.5067	0.861217		10.5067	0.85754		10.5067	0.86594		10.5067	0.855252		10.5067	0.861258		10.5067	0.859656		10.5067	0.853886		10.5067	0.848668		10.5067	0.847228		10.5067	0.845009		10.5067	0.844817
10.5812	0.853199		10.5812	0.856402		10.5812	0.855853		10.5812	0.875893		10.5812	0.86233		10.5812	0.857284		10.5812	0.86533		10.5812	0.855471		10.5812	0.861193		10.5812	0.860558		10.5812	0.85395		10.5812	0.849193		10.5812	0.847082		10.5812	0.844754		10.5812	0.844153
10.6557	0.853652		10.6557	0.855467		10.6557	0.855558		10.6557	0.875178		10.6557	0.859587		10.6557	0.857652		10.6557	0.864899		10.6557	0.854607		10.6557	0.86073		10.6557	0.859922		10.6557	0.853121		10.6557	0.848286		10.6557	0.846458		10.6557	0.844355		10.6557	0.844172
10.7302	0.85376		10.7302	0.855321		10.7302	0.855764		10.7302	0.875233		10.7302	0.861994		10.7302	0.855777		10.7302	0.865918		10.7302	0.854152		10.7302	0.860076		10.7302	0.859187		10.7302	0.852801		10.7302	0.84899		10.7302	0.846478		10.7302	0.843412		10.7302	0.84512
10.8048	0.852761		10.8048	0.855255		10.8048	0.856811		10.8048	0.874541		10.8048	0.860941		10.8048	0.857605		10.8048	0.866224		10.8048	0.854266		10.8048	0.859434		10.8048	0.858337		10.8048	0.853269		10.8048	0.848731		10.8048	0.846022		10.8048	0.844507		10.8048	0.843842
10.8793	0.852756		10.8793	0.854919		10.8793	0.854493		10.8793	0.874269		10.8793	0.86049		10.8793	0.858028		10.8793	0.864367		10.8793	0.854772		10.8793	0.860473		10.8793	0.859054		10.8793	0.853074		10.8793	0.84855		10.8793	0.846194		10.8793	0.84457		10.8793	0.843182
10.9538	0.852332		10.9538	0.854964		10.9538	0.855783		10.9538	0.873781		10.9538	0.86047		10.9538	0.856313		10.9538	0.864621		10.9538	0.853611		10.9538	0.859358		10.9538	0.859191		10.9538	0.852389		10.9538	0.847792		10.9538	0.846222		10.9538	0.844012		10.9538	0.844028
11.0283	0.852296		11.0283	0.85453		11.0283	0.855494		11.0283	0.874663		11.0283	0.860757		11.0283	0.855958		11.0283	0.865044		11.0283	0.854017		11.0283	0.85886		11.0283	0.85909		11.0283	0.85286		11.0283	0.847261		11.0283	0.845736		11.0283	0.843492		11.0283	0.843386
11.1028	0.851699		11.1028	0.853986		11.1028	0.854729		11.1028	0.87521		11.1028	0.859849		11.1028	0.856048		11.1028	0.863507		11.1028	0.854196		11.1028	0.858727		11.1028	0.857667		11.1028	0.852886		11.1028	0.847744		11.1028	0.845403		11.1028	0.843705		11.1028	0.843145
11.1773	0.85159		11.1773	0.853574		11.1773	0.854488		11.1773	0.874158		11.1773	0.860028		11.1773	0.856053		11.1773	0.863914		11.1773	0.853702		11.1773	0.858775		11.1773	0.858655		11.1773	0.851863		11.1773	0.846271		11.1773	0.846153		11.1773	0.843026		11.1773	0.843358
11.2519	0.851569		11.2519	0.853772		11.2519	0.854443		11.2519	0.874077		11.2519	0.860188		11.2519	0.855915		11.2519	0.86362		11.2519	0.853401		11.2519	0.859043		11.2519	0.858249		11.2519	0.851604		11.2519	0.84685		11.2519	0.846173		11.2519	0.84275		11.2519	0.843071
11.3264	0.851628		11.3264	0.854023		11.3264	0.854851		11.3264	0.87347		11.3264	0.859858		11.3264	0.855917		11.3264	0.863388		11.3264	0.853732		11.3264	0.859294		11.3264	0.857505		11.3264	0.852024		11.3264	0.845987		11.3264	0.84551		11.3264	0.8425		11.3264	0.842972
11.4009	0.851162		11.4009	0.853457		11.4009	0.854692		11.4009	0.873274		11.4009	0.859067		11.4009	0.855885		11.4009	0.86393		11.4009	0.853746		11.4009	0.858668		11.4009	0.856831		11.4009	0.851699		11.4009	0.846757		11.4009	0.84423		11.4009	0.841956		11.4009	0.842289
11.4754	0.850182		11.4754	0.853698		11.4754	0.85419		11.4754	0.874714		11.4754	0.858823		11.4754	0.855909		11.4754	0.863676		11.4754	0.852625		11.4754	0.858841		11.4754	0.857636		11.4754	0.851283		11.4754	0.846334		11.4754	0.845349		11.4754	0.841407		11.4754	0.842544
11.5499	0.850585		11.5499	0.853078		11.5499	0.85394		11.5499	0.873151		11.5499	0.858722		11.5499	0.855296		11.5499	0.863803		11.5499	0.852036		11.5499	0.858768		11.5499	0.857931		11.5499	0.851787		11.5499	0.846575		11.5499	0.844934		11.5499	0.841849		11.5499	0.842063
11.6244	0.850817		11.6244	0.853405		11.6244	0.854037		11.6244	0.874209		11.6244	0.858754		11.6244	0.85498		11.6244	0.862535		11.6244	0.851878		11.6244	0.85724		11.6244	0.856966		11.6244	0.851271		11.6244	0.846356		11.6244	0.844797		11.6244	0.841657		11.6244	0.841426
11.6989	0.850279		11.6989	0.852789		11.6989	0.854121		11.6989	0.873464		11.6989	0.859919		11.6989	0.854649		11.6989	0.861574		11.6989	0.852574		11.6989	0.85738		11.6989	0.856238		11.6989	0.85109		11.6989	0.845674		11.6989	0.84417		11.6989	0.841977		11.6989	0.842601
11.7735	0.849972		11.7735	0.853566		11.7735	0.853155		11.7735	0.873021		11.7735	0.859087		11.7735	0.85391		11.7735	0.862696		11.7735	0.851845		11.7735	0.857754		11.7735	0.856693		11.7735	0.850386		11.7735	0.846309		11.7735	0.844047		11.7735	0.841468		11.7735	0.841712
11.848	0.850181		11.848	0.851918		11.848	0.853882		11.848	0.872957		11.848	0.858449		11.848	0.855126		11.848	0.86193		11.848	0.852256		11.848	0.857589		11.848	0.856876		11.848	0.850758		11.848	0.846064		11.848	0.843911		11.848	0.841633		11.848	0.840662
11.9225	0.849878		11.9225	0.853516		11.9225	0.85327		11.9225	0.87235		11.9225	0.858563		11.9225	0.854911		11.9225	0.862134		11.9225	0.852075		11.9225	0.857249		11.9225	0.856646		11.9225	0.850062		11.9225	0.845833		11.9225	0.844364		11.9225	0.841383		11.9225	0.841981
11.997	0.849831		11.997	0.853438		11.997	0.853186		11.997	0.872114		11.997	0.858119		11.997	0.854058		11.997	0.861731		11.997	0.851508		11.997	0.857173		11.997	0.856932		11.997	0.85112		11.997	0.845738		11.997	0.844488		11.997	0.841413		11.997	0.840345
12.0715	0.849974		12.0715	0.851289		12.0715	0.853602		12.0715	0.872352		12.0715	0.858836		12.0715	0.853654		12.0715	0.861894		12.0715	0.851021		12.0715	0.857663		12.0715	0.856513		12.0715	0.850262		12.0715	0.845236		12.0715	0.842566		12.0715	0.840497		12.0715	0.840181
12.146	0.849554		12.146	0.852834		12.146	0.853691		12.146	0.872817		12.146	0.857711		12.146	0.854288		12.146	0.861379		12.146	0.850916		12.146	0.857744		12.146	0.855666		12.146	0.849903		12.146	0.845523		12.146	0.843212		12.146	0.840711		12.146	0.84077
12.2206	0.849323		12.2206	0.852358		12.2206	0.852912		12.2206	0.87231		12.2206	0.858216		12.2206	0.853613		12.2206	0.861795		12.2206	0.850717		12.2206	0.85768		12.2206	0.854829		12.2206	0.850379		12.2206	0.845356		12.2206	0.842938		12.2206	0.840448		12.2206	0.84096
12.2951	0.848955		12.2951	0.85269		12.2951	0.852314		12.2951	0.871801		12.2951	0.858184		12.2951	0.853764		12.2951	0.861808		12.2951	0.850959		12.2951	0.856587		12.2951	0.856211		12.2951	0.849437		12.2951	0.844648		12.2951	0.84306		12.2951	0.840795		12.2951	0.840442
12.3696	0.849734		12.3696	0.852808		12.3696	0.851397		12.3696	0.871884		12.3696	0.857021		12.3696	0.853575		12.3696	0.861433		12.3696	0.850621		12.3696	0.856956		12.3696	0.854967		12.3696	0.850335		12.3696	0.844612		12.3696	0.842668		12.3696	0.840156		12.3696	0.84106
12.4441	0.848953		12.4441	0.852966		12.4441	0.852625		12.4441	0.872035		12.4441	0.857308		12.4441	0.853938		12.4441	0.861493		12.4441	0.850864		12.4441	0.856311		12.4441	0.855442		12.4441	0.84972		12.4441	0.845198		12.4441	0.842421		12.4441	0.839959		12.4441	0.840206
12.5186	0.849458		12.5186	0.852418		12.5186	0.852126		12.5186	0.871748		12.5186	0.85735		12.5186	0.853016		12.5186	0.860831		12.5186	0.850629		12.5186	0.856238		12.5186	0.855665		12.5186	0.849727		12.5186	0.844996		12.5186	0.842236		12.5186	0.8409		12.5186	0.84036
12.5931	0.849543		12.5931	0.851326		12.5931	0.851762		12.5931	0.872082		12.5931	0.856965		12.5931	0.853171		12.5931	0.861687		12.5931	0.850595		12.5931	0.856106		12.5931	0.856615		12.5931	0.849749		12.5931	0.844292		12.5931	0.842429		12.5931	0.840076		12.5931	0.840371
12.6677	0.849144		12.6677	0.851549		12.6677	0.852652		12.6677	0.870783		12.6677	0.856933		12.6677	0.853495		12.6677	0.861727		12.6677	0.850349		12.6677	0.855584		12.6677	0.85565		12.6677	0.849554		12.6677	0.844723		12.6677	0.842501		12.6677	0.839359		12.6677	0.840305
12.7422	0.848644		12.7422	0.852647		12.7422	0.85143		12.7422	0.871516		12.7422	0.856586		12.7422	0.853719		12.7422	0.860613		12.7422	0.849759		12.7422	0.85567		12.7422	0.855052		12.7422	0.849039		12.7422	0.843909		12.7422	0.841947		12.7422	0.839459		12.7422	0.839377
12.8167	0.847484		12.8167	0.851131		12.8167	0.851788		12.8167	0.871673		12.8167	0.858184		12.8167	0.852466		12.8167	0.86075		12.8167	0.850237		12.8167	0.855489		12.8167	0.854764		12.8167	0.849263		12.8167	0.84319		12.8167	0.841985		12.8167	0.839407		12.8167	0.840162
12.8912	0.847884		12.8912	0.850484		12.8912	0.851809		12.8912	0.871098		12.8912	0.857184		12.8912	0.853186		12.8912	0.860615		12.8912	0.84917		12.8912	0.855157		12.8912	0.853756		12.8912	0.849133		12.8912	0.843743		12.8912	0.841981		12.8912	0.839529		12.8912	0.839998
12.9657	0.848169		12.9657	0.850931		12.9657	0.852256		12.9657	0.870702		12.9657	0.857088		12.9657	0.852728		12.9657	0.860928		12.9657	0.850008		12.9657	0.855568		12.9657	0.854912		12.9657	0.848048		12.9657	0.843166		12.9657	0.841513		12.9657	0.839739		12.9657	0.839238
13.0402	0.847681		13.0402	0.851479		13.0402	0.850358		13.0402	0.872431		13.0402	0.856118		13.0402	0.853243		13.0402	0.86019		13.0402	0.849483		13.0402	0.85536		13.0402	0.854545		13.0402	0.84814		13.0402	0.843631		13.0402	0.841387		13.0402	0.83859		13.0402	0.83937
13.1147	0.847469		13.1147	0.851436		13.1147	0.852089		13.1147	0.871132		13.1147	0.856116		13.1147	0.852779		13.1147	0.860883		13.1147	0.849593		13.1147	0.854296		13.1147	0.854394		13.1147	0.848622		13.1147	0.843959		13.1147	0.841164		13.1147	0.838458		13.1147	0.838917
13.1893	0.848059		13.1893	0.850807		13.1893	0.850311		13.1893	0.871447		13.1893	0.856848		13.1893	0.852528		13.1893	0.859705		13.1893	0.849676		13.1893	0.854417		13.1893	0.854613		13.1893	0.848702		13.1893	0.843334		13.1893	0.841134		13.1893	0.839492		13.1893	0.838527
13.2638	0.847525		13.2638	0.851172		13.2638	0.850908		13.2638	0.87014		13.2638	0.855623		13.2638	0.852051		13.2638	0.859685		13.2638	0.850126		13.2638	0.85457		13.2638	0.854026		13.2638	0.84773		13.2638	0.843144		13.2638	0.841875		13.2638	0.839375		13.2638	0.838989
13.3383	0.847687		13.3383	0.851312		13.3383	0.85177		13.3383	0.870728		13.3383	0.856006		13.3383	0.85215		13.3383	0.859737		13.3383	0.848869		13.3383	0.855015		13.3383	0.854277		13.3383	0.848524		13.3383	0.842937		13.3383	0.841351		13.3383	0.838743		13.3383	0.839447
13.4128	0.847046		13.4128	0.850097		13.4128	0.851007		13.4128	0.870691		13.4128	0.856591		13.4128	0.852132		13.4128	0.860068		13.4128	0.849024		13.4128	0.85433		13.4128	0.85379		13.4128	0.848068		13.4128	0.841901		13.4128	0.841086		13.4128	0.838388		13.4128	0.838886
13.4873	0.847695		13.4873	0.850694		13.4873	0.851374		13.4873	0.869867		13.4873	0.856096		13.4873	0.851258		13.4873	0.859445		13.4873	0.849575		13.4873	0.854084		13.4873	0.853797		13.4873	0.847441		13.4873	0.842928		13.4873	0.84094		13.4873	0.838967		13.4873	0.838993
13.5618	0.848088		13.5618	0.849852		13.5618	0.850288		13.5618	0.870941		13.5618	0.855181		13.5618	0.851666		13.5618	0.859762		13.5618	0.848124		13.5618	0.854232		13.5618	0.853544		13.5618	0.847695		13.5618	0.842855		13.5618	0.840739		13.5618	0.837331		13.5618	0.83868
13.6364	0.846866		13.6364	0.850966		13.6364	0.850437		13.6364	0.869835		13.6364	0.856013		13.6364	0.850763		13.6364	0.860215		13.6364	0.84868		13.6364	0.854517		13.6364	0.853959		13.6364	0.847603		13.6364	0.841455		13.6364	0.840556		13.6364	0.837978		13.6364	0.838602
13.7109	0.847631		13.7109	0.849775		13.7109	0.850259		13.7109	0.871141		13.7109	0.855604		13.7109	0.852201		13.7109	0.859222		13.7109	0.849156		13.7109	0.853977		13.7109	0.853886		13.7109	0.846813		13.7109	0.841584		13.7109	0.841124		13.7109	0.837412		13.7109	0.83856
13.7854	0.847652		13.7854	0.85006		13.7854	0.850068		13.7854	0.86988		13.7854	0.856259		13.7854	0.850795		13.7854	0.860243		13.7854	0.848424		13.7854	0.854114		13.7854	0.854119		13.7854	0.847415		13.7854	0.842183		13.7854	0.840225		13.7854	0.837498		13.7854	0.838397
13.8599	0.847451		13.8599	0.850294		13.8599	0.850579		13.8599	0.870583		13.8599	0.855986		13.8599	0.851417		13.8599	0.859401		13.8599	0.848277		13.8599	0.853947		13.8599	0.852651		13.8599	0.846959		13.8599	0.84218		13.8599	0.839908		13.8599	0.837907		13.8599	0.838585
13.9344	0.846852		13.9344	0.850018		13.9344	0.850653		13.9344	0.869358		13.9344	0.855085		13.9344	0.850765		13.9344	0.859242		13.9344	0.848385		13.9344	0.8541		13.9344	0.854037		13.9344	0.846887		13.9344	0.84183		13.9344	0.84028		13.9344	0.837963		13.9344	0.83788
14.0089	0.846722		14.0089	0.849971		14.0089	0.850121		14.0089	0.870019		14.0089	0.854674		14.0089	0.851855		14.0089	0.857874		14.0089	0.848016		14.0089	0.853199		14.0089	0.853068		14.0089	0.847261		14.0089	0.841706		14.0089	0.839936		14.0089	0.837517		14.0089	0.837687
14.0834	0.846498		14.0834	0.850082		14.0834	0.849835		14.0834	0.869706		14.0834	0.854748		14.0834	0.850183		14.0834	0.85991		14.0834	0.848416		14.0834	0.85393		14.0834	0.852721		14.0834	0.847359		14.0834	0.841386		14.0834	0.840207		14.0834	0.837036		14.0834	0.837527
14.158	0.846985		14.158	0.848933		14.158	0.850564		14.158	0.869422		14.158	0.855598		14.158	0.851144		14.158	0.858829		14.158	0.847544		14.158	0.853919		14.158	0.853201		14.158	0.847212		14.158	0.841169		14.158	0.839912		14.158	0.837094		14.158	0.837696
14.2325	0.84661		14.2325	0.849678		14.2325	0.849961		14.2325	0.869627		14.2325	0.855194		14.2325	0.851894		14.2325	0.858164		14.2325	0.848228		14.2325	0.853025		14.2325	0.852771		14.2325	0.847322		14.2325	0.841071		14.2325	0.839798		14.2325	0.837331		14.2325	0.837274
14.307	0.847358		14.307	0.848778		14.307	0.849961		14.307	0.870734		14.307	0.854628		14.307	0.850959		14.307	0.858509		14.307	0.84772		14.307	0.853427		14.307	0.853334		14.307	0.846314		14.307	0.841141		14.307	0.839058		14.307	0.837441		14.307	0.837934
14.3815	0.846974		14.3815	0.84926		14.3815	0.848858		14.3815	0.869022		14.3815	0.854181		14.3815	0.850314		14.3815	0.858046		14.3815	0.848355		14.3815	0.852913		14.3815	0.852734		14.3815	0.846226		14.3815	0.84079		14.3815	0.839054		14.3815	0.837892		14.3815	0.837626
14.456	0.846001		14.456	0.84952		14.456	0.849241		14.456	0.86968		14.456	0.854822		14.456	0.850503		14.456	0.857983		14.456	0.848419		14.456	0.853662		14.456	0.852401		14.456	0.846165		14.456	0.841296		14.456	0.839398		14.456	0.837226		14.456	0.837121
14.5305	0.846392		14.5305	0.848797		14.5305	0.849876		14.5305	0.869642		14.5305	0.854634		14.5305	0.850611		14.5305	0.858555		14.5305	0.847746		14.5305	0.853042		14.5305	0.851682		14.5305	0.846444		14.5305	0.840585		14.5305	0.839204		14.5305	0.836779		14.5305	0.836966
14.6051	0.846177		14.6051	0.848844		14.6051	0.849649		14.6051	0.86975		14.6051	0.853946		14.6051	0.850905		14.6051	0.85839		14.6051	0.847187		14.6051	0.852899		14.6051	0.851918		14.6051	0.846242		14.6051	0.841439		14.6051	0.839		14.6051	0.83624		14.6051	0.837022
14.6796	0.846419		14.6796	0.848455		14.6796	0.848885		14.6796	0.869427		14.6796	0.854392		14.6796	0.850421		14.6796	0.858295		14.6796	0.847483		14.6796	0.85333		14.6796	0.851923		14.6796	0.847157		14.6796	0.841044		14.6796	0.838831		14.6796	0.836272		14.6796	0.837088
14.7541	0.845932		14.7541	0.849279		14.7541	0.848207		14.7541	0.869388		14.7541	0.854107		14.7541	0.850164		14.7541	0.857202		14.7541	0.847583		14.7541	0.853039		14.7541	0.852877		14.7541	0.845886		14.7541	0.840366		14.7541	0.839254		14.7541	0.835594		14.7541	0.836598
14.8286	0.846273		14.8286	0.847668		14.8286	0.849688		14.8286	0.869601		14.8286	0.854197		14.8286	0.850381		14.8286	0.858406		14.8286	0.847397		14.8286	0.852573		14.8286	0.852879		14.8286	0.84593		14.8286	0.839949		14.8286	0.839405		14.8286	0.835762		14.8286	0.837034
14.9031	0.846323		14.9031	0.848272		14.9031	0.850125		14.9031	0.86905		14.9031	0.853926		14.9031	0.849891		14.9031	0.858036		14.9031	0.847141		14.9031	0.852374		14.9031	0.852746		14.9031	0.84604		14.9031	0.840708		14.9031	0.838763		14.9031	0.835536		14.9031	0.836671
14.9776	0.845647		14.9776	0.848471		14.9776	0.848901		14.9776	0.869548		14.9776	0.854135		14.9776	0.850258		14.9776	0.858154		14.9776	0.847081		14.9776	0.85253		14.9776	0.851463		14.9776	0.845897		14.9776	0.839924		14.9776	0.837844		14.9776	0.83654		14.9776	0.83709
15.0522	0.846068		15.0522	0.848852		15.0522	0.848914		15.0522	0.869437		15.0522	0.853294		15.0522	0.850061		15.0522	0.857413		15.0522	0.846906		15.0522	0.852182		15.0522	0.851524		15.0522	0.845619		15.0522	0.839904		15.0522	0.83874		15.0522	0.835509		15.0522	0.837501
15.1267	0.846165		15.1267	0.846986		15.1267	0.849744		15.1267	0.86823		15.1267	0.853763		15.1267	0.849639		15.1267	0.857081		15.1267	0.84689		15.1267	0.851955		15.1267	0.851397		15.1267	0.845395		15.1267	0.839557		15.1267	0.838084		15.1267	0.83579		15.1267	0.836572
15.2012	0.84582		15.2012	0.848331		15.2012	0.848514		15.2012	0.868228		15.2012	0.853971		15.2012	0.849115		15.2012	0.857172		15.2012	0.847449		15.2012	0.852372		15.2012	0.852164		15.2012	0.845942		15.2012	0.840079		15.2012	0.838387		15.2012	0.835374		15.2012	0.835747
15.2757	0.846439		15.2757	0.848414		15.2757	0.848429		15.2757	0.869109		15.2757	0.853178		15.2757	0.849725		15.2757	0.857538		15.2757	0.846531		15.2757	0.852509		15.2757	0.851317		15.2757	0.844661		15.2757	0.839608		15.2757	0.83853		15.2757	0.834905		15.2757	0.835987
15.3502	0.84627		15.3502	0.848982		15.3502	0.848646		15.3502	0.868564		15.3502	0.854211		15.3502	0.849807		15.3502	0.857897		15.3502	0.846486		15.3502	0.851615		15.3502	0.851508		15.3502	0.844981		15.3502	0.840017		15.3502	0.838074		15.3502	0.836037		15.3502	0.836572
15.4247	0.845169		15.4247	0.848296		15.4247	0.848481		15.4247	0.868532		15.4247	0.854074		15.4247	0.850484		15.4247	0.857057		15.4247	0.846409		15.4247	0.851933		15.4247	0.852065		15.4247	0.845071		15.4247	0.839554		15.4247	0.838112		15.4247	0.835449		15.4247	0.835689
15.4992	0.845499		15.4992	0.846953		15.4992	0.848017		15.4992	0.868854		15.4992	0.852785		15.4992	0.848571		15.4992	0.857673		15.4992	0.846425		15.4992	0.852266		15.4992	0.850615		15.4992	0.845635		15.4992	0.839654		15.4992	0.837954		15.4992	0.835641		15.4992	0.836492
15.5738	0.845443		15.5738	0.848259		15.5738	0.849274		15.5738	0.868368		15.5738	0.853509		15.5738	0.849493		15.5738	0.856696		15.5738	0.846583		15.5738	0.851595		15.5738	0.851242		15.5738	0.84525		15.5738	0.839369		15.5738	0.838274		15.5738	0.835607		15.5738	0.83569
15.6483	0.845674		15.6483	0.848096		15.6483	0.848277		15.6483	0.868637		15.6483	0.85333		15.6483	0.849313		15.6483	0.857115		15.6483	0.846171		15.6483	0.852662		15.6483	0.851197		15.6483	0.845329		15.6483	0.839581		15.6483	0.837687		15.6483	0.835056		15.6483	0.836004
15.7228	0.845607		15.7228	0.848377		15.7228	0.84812		15.7228	0.867832		15.7228	0.853182		15.7228	0.849876		15.7228	0.857105		15.7228	0.846324		15.7228	0.85171		15.7228	0.8511		15.7228	0.845455		15.7228	0.839597		15.7228	0.837192		15.7228	0.83466		15.7228	0.835975
15.7973	0.844913		15.7973	0.847757		15.7973	0.84893		15.7973	0.869052		15.7973	0.853148		15.7973	0.849643		15.7973	0.857566		15.7973	0.846174		15.7973	0.851601		15.7973	0.851725		15.7973	0.845413		15.7973	0.83959		15.7973	0.837575		15.7973	0.835157		15.7973	0.836576
15.8718	0.844405		15.8718	0.848307		15.8718	0.847399		15.8718	0.868615		15.8718	0.852852		15.8718	0.849431		15.8718	0.85751		15.8718	0.845654		15.8718	0.851104		15.8718	0.850512		15.8718	0.845201		15.8718	0.839523		15.8718	0.837299		15.8718	0.835208		15.8718	0.835905
15.9463	0.845698		15.9463	0.846937		15.9463	0.848011		15.9463	0.867985		15.9463	0.852996		15.9463	0.84901		15.9463	0.856543		15.9463	0.846746		15.9463	0.851226		15.9463	0.852241		15.9463	0.844977		15.9463	0.838618		15.9463	0.837416		15.9463	0.835433		15.9463	0.83592
16.0209	0.844962		16.0209	0.847989		16.0209	0.847391		16.0209	0.868309		16.0209	0.854054		16.0209	0.849624		16.0209	0.857272		16.0209	0.84542		16.0209	0.850662		16.0209	0.851123		16.0209	0.844898		16.0209	0.839372		16.0209	0.836722		16.0209	0.834791		16.0209	0.835117
16.0954	0.844647		16.0954	0.847919		16.0954	0.848283		16.0954	0.868123		16.0954	0.852889		16.0954	0.849072		16.0954	0.857015		16.0954	0.846427		16.0954	0.85059		16.0954	0.851468		16.0954	0.844473		16.0954	0.838308		16.0954	0.837022		16.0954	0.834945		16.0954	0.835438
16.1699	0.844299		16.1699	0.848101		16.1699	0.848069		16.1699	0.867647		16.1699	0.853339		16.1699	0.848728		16.1699	0.857375		16.1699	0.846355		16.1699	0.850567		16.1699	0.850077		16.1699	0.84481		16.1699	0.838848		16.1699	0.837069		16.1699	0.834555		16.1699	0.834868
16.2444	0.844422		16.2444	0.846867		16.2444	0.848046		16.2444	0.868624		16.2444	0.8532		16.2444	0.848999		16.2444	0.856809		16.2444	0.845931		16.2444	0.850548		16.2444	0.850839		16.2444	0.844336		16.2444	0.838554		16.2444	0.836989		16.2444	0.83545		16.2444	0.835438
16.3189	0.844485		16.3189	0.846968		16.3189	0.847292		16.3189	0.868358		16.3189	0.852586		16.3189	0.849781		16.3189	0.857097		16.3189	0.845829		16.3189	0.850751		16.3189	0.849822		16.3189	0.844196		16.3189	0.839128		16.3189	0.837458		16.3189	0.834442		16.3189	0.834988
16.3934	0.844676		16.3934	0.847167		16.3934	0.847525		16.3934	0.86813		16.3934	0.853101		16.3934	0.84876		16.3934	0.856559		16.3934	0.845737		16.3934	0.851472		16.3934	0.850516		16.3934	0.844508		16.3934	0.838813		16.3934	0.837358		16.3934	0.834347		16.3934	0.835547
16.4679	0.84491		16.4679	0.846479		16.4679	0.84792		16.4679	0.868468		16.4679	0.853473		16.4679	0.848446		16.4679	0.856557		16.4679	0.845361		16.4679	0.850811		16.4679	0.850597		16.4679	0.844981		16.4679	0.838484		16.4679	0.837172		16.4679	0.833832		16.4679	0.8343
16.5425	0.844059		16.5425	0.84788		16.5425	0.847747		16.5425	0.867351		16.5425	0.852312		16.5425	0.848225		16.5425	0.857242		16.5425	0.845235		16.5425	0.851016		16.5425	0.850892		16.5425	0.844141		16.5425	0.838854		16.5425	0.837153		16.5425	0.833704		16.5425	0.834303
16.617	0.844174		16.617	0.84652		16.617	0.847401		16.617	0.868221		16.617	0.852638		16.617	0.84838		16.617	0.856328		16.617	0.844694		16.617	0.849977		16.617	0.850036		16.617	0.844787		16.617	0.838328		16.617	0.836802		16.617	0.833786		16.617	0.833604
16.6915	0.844517		16.6915	0.847036		16.6915	0.84725		16.6915	0.866937		16.6915	0.852489		16.6915	0.848115		16.6915	0.856565		16.6915	0.84538		16.6915	0.850575		16.6915	0.850097		16.6915	0.844296		16.6915	0.838267		16.6915	0.837478		16.6915	0.834735		16.6915	0.835478
16.766	0.844105		16.766	0.847305		16.766	0.847298		16.766	0.867253		16.766	0.851757		16.766	0.848261		16.766	0.856318		16.766	0.846429		16.766	0.850438		16.766	0.850557		16.766	0.844421		16.766	0.83846		16.766	0.836976		16.766	0.833338		16.766	0.834567
16.8405	0.844793		16.8405	0.84741		16.8405	0.848038		16.8405	0.866927		16.8405	0.852458		16.8405	0.849259		16.8405	0.856225		16.8405	0.845457		16.8405	0.850827		16.8405	0.851226		16.8405	0.844038		16.8405	0.838893		16.8405	0.836769		16.8405	0.834088		16.8405	0.834775
16.915	0.844243		16.915	0.846735		16.915	0.847191		16.915	0.867817		16.915	0.853059		16.915	0.848438		16.915	0.856948		16.915	0.844877		16.915	0.849928		16.915	0.850665		16.915	0.844275		16.915	0.838228		16.915	0.836708		16.915	0.833369		16.915	0.834845
16.9896	0.844164		16.9896	0.84677		16.9896	0.848038		16.9896	0.867685		16.9896	0.851947		16.9896	0.84815		16.9896	0.856523		16.9896	0.845659		16.9896	0.850243		16.9896	0.850228		16.9896	0.843804		16.9896	0.838648		16.9896	0.836625		16.9896	0.834247		16.9896	0.834162
17.0641	0.843289		17.0641	0.847017		17.0641	0.846727		17.0641	0.868209		17.0641	0.853104		17.0641	0.848339		17.0641	0.85642		17.0641	0.844081		17.0641	0.850425		17.0641	0.849335		17.0641	0.844369		17.0641	0.838265		17.0641	0.836358		17.0641	0.833879		17.0641	0.834709
17.1386	0.843841		17.1386	0.846603		17.1386	0.846776		17.1386	0.866903		17.1386	0.85218		17.1386	0.848289		17.1386	0.856118		17.1386	0.8459		17.1386	0.850296		17.1386	0.849653		17.1386	0.84368		17.1386	0.837929		17.1386	0.83731		17.1386	0.833473		17.1386	0.834674
17.2131	0.843185		17.2131	0.84602		17.2131	0.846774		17.2131	0.866963		17.2131	0.852738		17.2131	0.848857		17.2131	0.856761		17.2131	0.844355		17.2131	0.849028		17.2131	0.850275		17.2131	0.843791		17.2131	0.838391		17.2131	0.836377		17.2131	0.833962		17.2131	0.834482
17.2876	0.843333		17.2876	0.846277		17.2876	0.846535		17.2876	0.867095		17.2876	0.851539		17.2876	0.848668		17.2876	0.856291		17.2876	0.845511		17.2876	0.849794		17.2876	0.849112		17.2876	0.84371		17.2876	0.837297		17.2876	0.836702		17.2876	0.83302		17.2876	0.834538
17.3621	0.844696		17.3621	0.847073		17.3621	0.846008		17.3621	0.867442		17.3621	0.851613		17.3621	0.847851		17.3621	0.855305		17.3621	0.845284		17.3621	0.849635		17.3621	0.849425		17.3621	0.843527		17.3621	0.837827		17.3621	0.836021		17.3621	0.833353		17.3621	0.834213
17.4366	0.844305		17.4366	0.846399		17.4366	0.84669		17.4366	0.867485		17.4366	0.851203		17.4366	0.848898		17.4366	0.856306		17.4366	0.845071		17.4366	0.84969		17.4366	0.849855		17.4366	0.843641		17.4366	0.837782		17.4366	0.836351		17.4366	0.833466		17.4366	0.834311
17.5112	0.843849		17.5112	0.846368		17.5112	0.84655		17.5112	0.866897		17.5112	0.851602		17.5112	0.848298		17.5112	0.855925		17.5112	0.844609		17.5112	0.849506		17.5112	0.85075		17.5112	0.843447		17.5112	0.837316		17.5112	0.83616		17.5112	0.833566		17.5112	0.83385
17.5857	0.84361		17.5857	0.84663		17.5857	0.846914		17.5857	0.867465		17.5857	0.851768		17.5857	0.848074		17.5857	0.855687		17.5857	0.844953		17.5857	0.849953		17.5857	0.84883		17.5857	0.842998		17.5857	0.837961		17.5857	0.836438		17.5857	0.832932		17.5857	0.834601
17.6602	0.844039		17.6602	0.845758		17.6602	0.846531		17.6602	0.866686		17.6602	0.852129		17.6602	0.848074		17.6602	0.855999		17.6602	0.844992		17.6602	0.850597		17.6602	0.849098		17.6602	0.842862		17.6602	0.837362		17.6602	0.836204		17.6602	0.834308		17.6602	0.833783
17.7347	0.843119		17.7347	0.846144		17.7347	0.846125		17.7347	0.866859		17.7347	0.85186		17.7347	0.847789		17.7347	0.856656		17.7347	0.844435		17.7347	0.849908		17.7347	0.849448		17.7347	0.843805		17.7347	0.83794		17.7347	0.835853		17.7347	0.833476		17.7347	0.833584
17.8092	0.843634		17.8092	0.845505		17.8092	0.846902		17.8092	0.867006		17.8092	0.851759		17.8092	0.84752		17.8092	0.854914		17.8092	0.844944		17.8092	0.849643		17.8092	0.849125		17.8092	0.843086		17.8092	0.836741		17.8092	0.835657		17.8092	0.834089		17.8092	0.833783
17.8837	0.843248		17.8837	0.846086		17.8837	0.846653		17.8837	0.86682		17.8837	0.852034		17.8837	0.847739		17.8837	0.855121		17.8837	0.845149		17.8837	0.849288		17.8837	0.848697		17.8837	0.842959		17.8837	0.837412		17.8837	0.835537		17.8837	0.833276		17.8837	0.834106
17.9583	0.843547		17.9583	0.846008		17.9583	0.845847		17.9583	0.86662		17.9583	0.851006		17.9583	0.847988		17.9583	0.85545		17.9583	0.844811		17.9583	0.849237		17.9583	0.849923		17.9583	0.843721		17.9583	0.836904		17.9583	0.836594		17.9583	0.83313		17.9583	0.834047
18.0328	0.843236		18.0328	0.844868		18.0328	0.846354		18.0328	0.866503		18.0328	0.850641		18.0328	0.847698		18.0328	0.855045		18.0328	0.844857		18.0328	0.850034		18.0328	0.849251		18.0328	0.842277		18.0328	0.83808		18.0328	0.83464		18.0328	0.833895		18.0328	0.833645
18.1073	0.843203		18.1073	0.845622		18.1073	0.846465		18.1073	0.867116		18.1073	0.851566		18.1073	0.848047		18.1073	0.854886		18.1073	0.844109		18.1073	0.848961		18.1073	0.848949		18.1073	0.843558		18.1073	0.837145		18.1073	0.835857		18.1073	0.83279		18.1073	0.833228
18.1818	0.844139		18.1818	0.845571		18.1818	0.845917		18.1818	0.867427		18.1818	0.851633		18.1818	0.848074		18.1818	0.85551		18.1818	0.844652		18.1818	0.848629		18.1818	0.849271		18.1818	0.843587		18.1818	0.837171		18.1818	0.835728		18.1818	0.832699		18.1818	0.834165
18.2563	0.84331		18.2563	0.846179		18.2563	0.847182		18.2563	0.867406		18.2563	0.850766		18.2563	0.847427		18.2563	0.855685		18.2563	0.844896		18.2563	0.849829		18.2563	0.85005		18.2563	0.843103		18.2563	0.837569		18.2563	0.83557		18.2563	0.832387		18.2563	0.833632
18.3308	0.84301		18.3308	0.844858		18.3308	0.846517		18.3308	0.868298		18.3308	0.850894		18.3308	0.846336		18.3308	0.854727		18.3308	0.843643		18.3308	0.849614		18.3308	0.848686		18.3308	0.843074		18.3308	0.837089		18.3308	0.8362		18.3308	0.83218		18.3308	0.834289
18.4054	0.842881		18.4054	0.844961		18.4054	0.845655		18.4054	0.866797		18.4054	0.851795		18.4054	0.847006		18.4054	0.855458		18.4054	0.844484		18.4054	0.850002		18.4054	0.849463		18.4054	0.843629		18.4054	0.837715		18.4054	0.83579		18.4054	0.832757		18.4054	0.833245
18.4799	0.842959		18.4799	0.845771		18.4799	0.846482		18.4799	0.866539		18.4799	0.851918		18.4799	0.847948		18.4799	0.854809		18.4799	0.844101		18.4799	0.848836		18.4799	0.848915		18.4799	0.843212		18.4799	0.8371		18.4799	0.835533		18.4799	0.833096		18.4799	0.833242
18.5544	0.843478		18.5544	0.844619		18.5544	0.846912		18.5544	0.866392		18.5544	0.851402		18.5544	0.847376		18.5544	0.855315		18.5544	0.845188		18.5544	0.849243		18.5544	0.849141		18.5544	0.842699		18.5544	0.836734		18.5544	0.835414		18.5544	0.832513		18.5544	0.833103
18.6289	0.843366		18.6289	0.845674		18.6289	0.84607		18.6289	0.867038		18.6289	0.850988		18.6289	0.847924		18.6289	0.855325		18.6289	0.844609		18.6289	0.849154		18.6289	0.849193		18.6289	0.843105		18.6289	0.837055		18.6289	0.835573		18.6289	0.832058		18.6289	0.833105
18.7034	0.842938		18.7034	0.84588		18.7034	0.84648		18.7034	0.866637		18.7034	0.850824		18.7034	0.846744		18.7034	0.854268		18.7034	0.844692		18.7034	0.849193		18.7034	0.848827		18.7034	0.843277		18.7034	0.837457		18.7034	0.835593		18.7034	0.83222		18.7034	0.832905
18.7779	0.842437		18.7779	0.845913		18.7779	0.846105		18.7779	0.866126		18.7779	0.850894		18.7779	0.847451		18.7779	0.854413		18.7779	0.844414		18.7779	0.849428		18.7779	0.848739		18.7779	0.842653		18.7779	0.83672		18.7779	0.834675		18.7779	0.832429		18.7779	0.833363
18.8524	0.842552		18.8524	0.845375		18.8524	0.845478		18.8524	0.866267		18.8524	0.850219		18.8524	0.847054		18.8524	0.855687		18.8524	0.843595		18.8524	0.848822		18.8524	0.848999		18.8524	0.843242		18.8524	0.836939		18.8524	0.834886		18.8524	0.832144		18.8524	0.833661
18.927	0.842962		18.927	0.844973		18.927	0.845874		18.927	0.866211		18.927	0.851124		18.927	0.847337		18.927	0.855299		18.927	0.84533		18.927	0.849276		18.927	0.848553		18.927	0.842513		18.927	0.837453		18.927	0.835459		18.927	0.83186		18.927	0.833667
19.0015	0.844086		19.0015	0.845373		19.0015	0.845999		19.0015	0.867414		19.0015	0.850934		19.0015	0.846809		19.0015	0.855027		19.0015	0.843278		19.0015	0.848643		19.0015	0.848151		19.0015	0.842539		19.0015	0.836344		19.0015	0.834989		19.0015	0.832469		19.0015	0.833343
19.076	0.842406		19.076	0.845186		19.076	0.845565		19.076	0.865896		19.076	0.850692		19.076	0.847051		19.076	0.854551		19.076	0.844014		19.076	0.848802		19.076	0.849308		19.076	0.843274		19.076	0.836788		19.076	0.835333		19.076	0.83284		19.076	0.833246
19.1505	0.842732		19.1505	0.845332		19.1505	0.846177		19.1505	0.866967		19.1505	0.851151		19.1505	0.848184		19.1505	0.855569		19.1505	0.843503		19.1505	0.84802		19.1505	0.84827		19.1505	0.84261		19.1505	0.836452		19.1505	0.835401		19.1505	0.832723		19.1505	0.833111
19.225	0.842392		19.225	0.844419		19.225	0.846133		19.225	0.86682		19.225	0.850233		19.225	0.848049		19.225	0.854741		19.225	0.844171		19.225	0.849564		19.225	0.848126		19.225	0.842124		19.225	0.837246		19.225	0.834768		19.225	0.832916		19.225	0.833327
19.2995	0.843233		19.2995	0.844561		19.2995	0.845709		19.2995	0.866509		19.2995	0.851131		19.2995	0.847935		19.2995	0.854392		19.2995	0.843017		19.2995	0.848746		19.2995	0.847619		19.2995	0.842622		19.2995	0.837391		19.2995	0.834072		19.2995	0.83165		19.2995	0.83334
19.3741	0.843172		19.3741	0.845081		19.3741	0.846525		19.3741	0.865728		19.3741	0.850612		19.3741	0.847441		19.3741	0.854558		19.3741	0.842639		19.3741	0.848354		19.3741	0.849298		19.3741	0.842141		19.3741	0.836886		19.3741	0.834276		19.3741	0.83285		19.3741	0.83313
19.4486	0.842683		19.4486	0.845309		19.4486	0.844781		19.4486	0.866503		19.4486	0.849637		19.4486	0.847112		19.4486	0.854695		19.4486	0.84324		19.4486	0.848629		19.4486	0.849121		19.4486	0.842723		19.4486	0.836845		19.4486	0.834375		19.4486	0.832774		19.4486	0.833813
19.5231	0.841717		19.5231	0.8454		19.5231	0.846088		19.5231	0.86586		19.5231	0.850674		19.5231	0.846351		19.5231	0.854461		19.5231	0.843149		19.5231	0.848757		19.5231	0.848298		19.5231	0.842589		19.5231	0.836893		19.5231	0.834345		19.5231	0.832357		19.5231	0.8331
19.5976	0.841717		19.5976	0.843976		19.5976	0.845117		19.5976	0.867574		19.5976	0.849551		19.5976	0.846557		19.5976	0.854332		19.5976	0.84341		19.5976	0.84807		19.5976	0.848591		19.5976	0.843087		19.5976	0.836226		19.5976	0.834452		19.5976	0.832181		19.5976	0.832722
19.6721	0.842156		19.6721	0.845043		19.6721	0.845596		19.6721	0.86629		19.6721	0.850661		19.6721	0.846559		19.6721	0.854821		19.6721	0.843139		19.6721	0.847824		19.6721	0.848458		19.6721	0.842189		19.6721	0.837098		19.6721	0.834331		19.6721	0.832419		19.6721	0.832637
19.7466	0.842042		19.7466	0.844689		19.7466	0.845437		19.7466	0.866486		19.7466	0.850705		19.7466	0.847339		19.7466	0.855417		19.7466	0.843529		19.7466	0.848695		19.7466	0.848852		19.7466	0.842405		19.7466	0.836955		19.7466	0.834433		19.7466	0.831704		19.7466	0.833228
19.8211	0.842286		19.8211	0.844615		19.8211	0.846034		19.8211	0.866375		19.8211	0.850091		19.8211	0.847959		19.8211	0.854582		19.8211	0.843423		19.8211	0.848097		19.8211	0.848782		19.8211	0.841859		19.8211	0.836255		19.8211	0.834692		19.8211	0.832326		19.8211	0.833479
19.8957	0.842578		19.8957	0.843457		19.8957	0.844851		19.8957	0.866535		19.8957	0.850354		19.8957	0.846121		19.8957	0.854765		19.8957	0.843983		19.8957	0.848336		19.8957	0.847851		19.8957	0.842211		19.8957	0.835972		19.8957	0.834086		19.8957	0.832237		19.8957	0.832698
19.9702	0.84223		19.9702	0.844636		19.9702	0.846002		19.9702	0.866678		19.9702	0.850623		19.9702	0.847187		19.9702	0.853812		19.9702	0.84331		19.9702	0.84784		19.9702	0.848534		19.9702	0.842281		19.9702	0.835997		19.9702	0.834266		19.9702	0.831887		19.9702	0.832665
20.0447	0.841764		20.0447	0.844584		20.0447	0.845076		20.0447	0.866367		20.0447	0.850156		20.0447	0.847402		20.0447	0.854394		20.0447	0.842914		20.0447	0.848195		20.0447	0.84862		20.0447	0.841659		20.0447	0.836049		20.0447	0.83365		20.0447	0.831733		20.0447	0.833111
20.1192	0.842331		20.1192	0.844055		20.1192	0.844279		20.1192	0.867133		20.1192	0.849829		20.1192	0.847468		20.1192	0.854835		20.1192	0.843786		20.1192	0.847958		20.1192	0.847885		20.1192	0.84174		20.1192	0.836562		20.1192	0.835156		20.1192	0.832154		20.1192	0.832993
20.1937	0.842177		20.1937	0.844765		20.1937	0.845958		20.1937	0.865615		20.1937	0.850459		20.1937	0.846981		20.1937	0.854006		20.1937	0.843299		20.1937	0.848327		20.1937	0.847384		20.1937	0.842167		20.1937	0.835586		20.1937	0.834159		20.1937	0.831843		20.1937	0.832606
20.2682	0.841913		20.2682	0.844662		20.2682	0.845616		20.2682	0.865736		20.2682	0.850107		20.2682	0.846069		20.2682	0.854374		20.2682	0.843752		20.2682	0.84815		20.2682	0.848627		20.2682	0.842615		20.2682	0.836066		20.2682	0.834913		20.2682	0.832146		20.2682	0.832782
20.3428	0.84172		20.3428	0.844833		20.3428	0.844891		20.3428	0.866226		20.3428	0.849908		20.3428	0.847208		20.3428	0.854209		20.3428	0.843977		20.3428	0.84788		20.3428	0.847215		20.3428	0.841511		20.3428	0.836554		20.3428	0.834718		20.3428	0.832321		20.3428	0.832001
20.4173	0.841493		20.4173	0.845179		20.4173	0.844948		20.4173	0.866631		20.4173	0.850428		20.4173	0.846041		20.4173	0.855188		20.4173	0.842697		20.4173	0.848268		20.4173	0.848356		20.4173	0.842305		20.4173	0.836055		20.4173	0.834288		20.4173	0.832114		20.4173	0.832531
20.4918	0.841113		20.4918	0.84375		20.4918	0.844689		20.4918	0.866067		20.4918	0.848924		20.4918	0.847494		20.4918	0.854415		20.4918	0.844029		20.4918	0.848073		20.4918	0.847488		20.4918	0.842002		20.4918	0.836319		20.4918	0.834244		20.4918	0.832247		20.4918	0.832339
20.5663	0.841105		20.5663	0.844287		20.5663	0.845437		20.5663	0.866435		20.5663	0.849814		20.5663	0.846424		20.5663	0.855055		20.5663	0.843374		20.5663	0.847657		20.5663	0.847714		20.5663	0.842423		20.5663	0.836323		20.5663	0.834225		20.5663	0.831804		20.5663	0.832183
20.6408	0.842227		20.6408	0.84328		20.6408	0.844913		20.6408	0.866035		20.6408	0.849997		20.6408	0.847047		20.6408	0.854529		20.6408	0.842645		20.6408	0.848351		20.6408	0.848996		20.6408	0.843304		20.6408	0.835721		20.6408	0.833942		20.6408	0.831687		20.6408	0.832388
20.7153	0.841573		20.7153	0.843441		20.7153	0.845066		20.7153	0.867257		20.7153	0.849769		20.7153	0.846746		20.7153	0.853901		20.7153	0.843031		20.7153	0.848302		20.7153	0.848546		20.7153	0.841665		20.7153	0.835907		20.7153	0.833987		20.7153	0.832186		20.7153	0.8317
20.7899	0.841119		20.7899	0.844094		20.7899	0.844996		20.7899	0.866422		20.7899	0.850389		20.7899	0.846508		20.7899	0.853597		20.7899	0.84311		20.7899	0.848064		20.7899	0.848257		20.7899	0.841706		20.7899	0.835481		20.7899	0.833537		20.7899	0.831532		20.7899	0.832963
20.8644	0.841966		20.8644	0.84367		20.8644	0.844726		20.8644	0.866043		20.8644	0.849684		20.8644	0.84611		20.8644	0.854735		20.8644	0.842242		20.8644	0.848237		20.8644	0.848176		20.8644	0.842481		20.8644	0.836258		20.8644	0.834089		20.8644	0.831321		20.8644	0.832802
20.9389	0.841696		20.9389	0.843451		20.9389	0.844143		20.9389	0.86655		20.9389	0.849004		20.9389	0.846765		20.9389	0.853913		20.9389	0.843191		20.9389	0.848276		20.9389	0.847525		20.9389	0.841848		20.9389	0.836402		20.9389	0.835531		20.9389	0.831904		20.9389	0.832027
21.0134	0.847099		21.0134	0.849557		21.0134	0.848524		21.0134	0.870857		21.0134	0.854571		21.0134	0.851071		21.0134	0.859282		21.0134	0.848763		21.0134	0.853595		21.0134	0.853724		21.0134	0.847788		21.0134	0.842407		21.0134	0.839534		21.0134	0.837597		21.0134	0.837833
21.0879	0.865074		21.0879	0.866171		21.0879	0.866207		21.0879	0.88782		21.0879	0.871586		21.0879	0.869339		21.0879	0.876326		21.0879	0.864318		21.0879	0.870725		21.0879	0.870367		21.0879	0.863987		21.0879	0.857971		21.0879	0.856062		21.0879	0.854621		21.0879	0.855624
21.1624	0.872953		21.1624	0.874738		21.1624	0.875215		21.1624	0.895862		21.1624	0.88044		21.1624	0.876634		21.1624	0.884972		21.1624	0.873604		21.1624	0.878164		21.1624	0.877775		21.1624	0.872862		21.1624	0.865981		21.1624	0.865406		21.1624	0.863263		21.1624	0.863611
21.2369	0.878194		21.2369	0.879932		21.2369	0.881134		21.2369	0.899938		21.2369	0.884817		21.2369	0.883041		21.2369	0.889704		21.2369	0.878716		21.2369	0.883605		21.2369	0.884508		21.2369	0.878376		21.2369	0.872508		21.2369	0.87089		21.2369	0.868206		21.2369	0.869854
21.3115	0.881857		21.3115	0.884173		21.3115	0.884464		21.3115	0.905376		21.3115	0.889755		21.3115	0.887557		21.3115	0.89425		21.3115	0.883458		21.3115	0.887638		21.3115	0.887601		21.3115	0.882546		21.3115	0.875786		21.3115	0.874863		21.3115	0.872191		21.3115	0.874673
21.386	0.886933		21.386	0.886804		21.386	0.889847		21.386	0.908157		21.386	0.89397		21.386	0.89112		21.386	0.897307		21.386	0.887868		21.386	0.890787		21.386	0.890991		21.386	0.886052		21.386	0.879761		21.386	0.878671		21.386	0.877194		21.386	0.878369
21.4605	0.888557		21.4605	0.890662		21.4605	0.892428		21.4605	0.911549		21.4605	0.89629		21.4605	0.894278		21.4605	0.900138		21.4605	0.890994		21.4605	0.893215		21.4605	0.894925		21.4605	0.888847		21.4605	0.883786		21.4605	0.881147		21.4605	0.880147		21.4605	0.881486
21.535	0.892578		21.535	0.893447		21.535	0.894839		21.535	0.914917		21.535	0.898277		21.535	0.895262		21.535	0.902279		21.535	0.893224		21.535	0.897173		21.535	0.897814		21.535	0.89209		21.535	0.885994		21.535	0.884852		21.535	0.88273		21.535	0.88444
21.6095	0.894094		21.6095	0.897114		21.6095	0.898075		21.6095	0.915232		21.6095	0.902056		21.6095	0.898699		21.6095	0.904633		21.6095	0.894982		21.6095	0.898792		21.6095	0.899243		21.6095	0.895349		21.6095	0.887933		21.6095	0.887104		21.6095	0.885977		21.6095	0.88745
21.684	0.897092		21.684	0.898791		21.684	0.899767		21.684	0.919197		21.684	0.904472		21.684	0.901257		21.684	0.908228		21.684	0.896997		21.684	0.901469		21.684	0.902821		21.684	0.896473		21.684	0.891503		21.684	0.89009		21.684	0.887426		21.684	0.889368
21.7586	0.899676		21.7586	0.901319		21.7586	0.902225		21.7586	0.920117		21.7586	0.906325		21.7586	0.903664		21.7586	0.910723		21.7586	0.900073		21.7586	0.903416		21.7586	0.903808		21.7586	0.89894		21.7586	0.893204		21.7586	0.892633		21.7586	0.891252		21.7586	0.891774
