# Supplementary material for: Structure–function analysis of Lactiplantibacillus plantarum DltE reveals D-alanylated lipoteichoic acids as direct cues supporting Drosophila juvenile growth
Source: eLife. 2023 Apr 12;12:e84669. doi: 10.7554/eLife.84669 (PMC10241514; doi:10.7554/eLife.84669)
Supplement: Figure 1—source data 6. — The experiment was made in triplicate. [file elife-84669-fig1-data6.xlsx]

## Sheet: RawData-1
Figure 1 - Figure Supplement 2d - replicate 1
NanoTemper Technologies	NanoTemper Technologies
MO.Affinity Analysis v2.3	MO.Affinity Analysis v2.3
Origin of exported data	Origin of exported data
Project Title:
Comment:
Project File Path:
Analysis-Set Name:	Analysis-Set #1
Exported from:	MST Traces
Exported on:	2023-03-15 13:35:24
Analysis Settings	Analysis Settings
Type of Analysis:	MST
Evaluation strategy:	On Time
Cold Region Start:	-1
Cold Region End:	0
Hot Region Start:	4
Hot Region End:	5
Sample Information	Sample Information		Sample Information	Sample Information		Sample Information	Sample Information		Sample Information	Sample Information		Sample Information	Sample Information		Sample Information	Sample Information		Sample Information	Sample Information		Sample Information	Sample Information		Sample Information	Sample Information		Sample Information	Sample Information		Sample Information	Sample Information		Sample Information	Sample Information		Sample Information	Sample Information		Sample Information	Sample Information		Sample Information	Sample Information		Sample Information	Sample Information
Merge-Set Name:	(#08)		Merge-Set Name:	(#08)		Merge-Set Name:	(#08)		Merge-Set Name:	(#08)		Merge-Set Name:	(#08)		Merge-Set Name:	(#08)		Merge-Set Name:	(#08)		Merge-Set Name:	(#08)		Merge-Set Name:	(#08)		Merge-Set Name:	(#08)		Merge-Set Name:	(#08)		Merge-Set Name:	(#08)		Merge-Set Name:	(#08)		Merge-Set Name:	(#08)		Merge-Set Name:	(#08)		Merge-Set Name:	(#08)
Run Name:	(#08)		Run Name:	(#08)		Run Name:	(#08)		Run Name:	(#08)		Run Name:	(#08)		Run Name:	(#08)		Run Name:	(#08)		Run Name:	(#08)		Run Name:	(#08)		Run Name:	(#08)		Run Name:	(#08)		Run Name:	(#08)		Run Name:	(#08)		Run Name:	(#08)		Run Name:	(#08)		Run Name:	(#08)
Date of Measurement:	2022-05-27 02:23:39		Date of Measurement:	2022-05-27 02:24:19		Date of Measurement:	2022-05-27 02:25:00		Date of Measurement:	2022-05-27 02:25:40		Date of Measurement:	2022-05-27 02:26:21		Date of Measurement:	2022-05-27 02:27:01		Date of Measurement:	2022-05-27 02:27:42		Date of Measurement:	2022-05-27 02:28:22		Date of Measurement:	2022-05-27 02:29:03		Date of Measurement:	2022-05-27 02:29:43		Date of Measurement:	2022-05-27 02:30:24		Date of Measurement:	2022-05-27 02:31:04		Date of Measurement:	2022-05-27 02:31:45		Date of Measurement:	2022-05-27 02:32:25		Date of Measurement:	2022-05-27 02:33:06		Date of Measurement:	2022-05-27 02:33:46
Capillary Type:	Monolith NT.115 Premium Capillary		Capillary Type:	Monolith NT.115 Premium Capillary		Capillary Type:	Monolith NT.115 Premium Capillary		Capillary Type:	Monolith NT.115 Premium Capillary		Capillary Type:	Monolith NT.115 Premium Capillary		Capillary Type:	Monolith NT.115 Premium Capillary		Capillary Type:	Monolith NT.115 Premium Capillary		Capillary Type:	Monolith NT.115 Premium Capillary		Capillary Type:	Monolith NT.115 Premium Capillary		Capillary Type:	Monolith NT.115 Premium Capillary		Capillary Type:	Monolith NT.115 Premium Capillary		Capillary Type:	Monolith NT.115 Premium Capillary		Capillary Type:	Monolith NT.115 Premium Capillary		Capillary Type:	Monolith NT.115 Premium Capillary		Capillary Type:	Monolith NT.115 Premium Capillary		Capillary Type:	Monolith NT.115 Premium Capillary
Capillary Position:	1		Capillary Position:	2		Capillary Position:	3		Capillary Position:	4		Capillary Position:	5		Capillary Position:	6		Capillary Position:	7		Capillary Position:	8		Capillary Position:	9		Capillary Position:	10		Capillary Position:	11		Capillary Position:	12		Capillary Position:	13		Capillary Position:	14		Capillary Position:	15		Capillary Position:	16
Ligand:	penicillin		Ligand:	penicillin		Ligand:	penicillin		Ligand:	penicillin		Ligand:	penicillin		Ligand:	penicillin		Ligand:	penicillin		Ligand:	penicillin		Ligand:	penicillin		Ligand:	penicillin		Ligand:	penicillin		Ligand:	penicillin		Ligand:	penicillin		Ligand:	penicillin		Ligand:	penicillin		Ligand:	penicillin
Ligand Concentration:	0.01		Ligand Concentration:	0.005		Ligand Concentration:	0.0025		Ligand Concentration:	0.00125		Ligand Concentration:	0.000625		Ligand Concentration:	0.0003125		Ligand Concentration:	0.00015625		Ligand Concentration:	7.8125e-05		Ligand Concentration:	3.90625e-05		Ligand Concentration:	1.95313e-05		Ligand Concentration:	9.76563e-06		Ligand Concentration:	4.88281e-06		Ligand Concentration:	2.44141e-06		Ligand Concentration:	1.2207e-06		Ligand Concentration:	6.10352e-07		Ligand Concentration:	3.05176e-07
Target:	DltE		Target:	DltE		Target:	DltE		Target:	DltE		Target:	DltE		Target:	DltE		Target:	DltE		Target:	DltE		Target:	DltE		Target:	DltE		Target:	DltE		Target:	DltE		Target:	DltE		Target:	DltE		Target:	DltE		Target:	DltE
TargetConcentration:	2e-08		TargetConcentration:	2e-08		TargetConcentration:	2e-08		TargetConcentration:	2e-08		TargetConcentration:	2e-08		TargetConcentration:	2e-08		TargetConcentration:	2e-08		TargetConcentration:	2e-08		TargetConcentration:	2e-08		TargetConcentration:	2e-08		TargetConcentration:	2e-08		TargetConcentration:	2e-08		TargetConcentration:	2e-08		TargetConcentration:	2e-08		TargetConcentration:	2e-08		TargetConcentration:	2e-08
Measurement Settings	Measurement Settings		Measurement Settings	Measurement Settings		Measurement Settings	Measurement Settings		Measurement Settings	Measurement Settings		Measurement Settings	Measurement Settings		Measurement Settings	Measurement Settings		Measurement Settings	Measurement Settings		Measurement Settings	Measurement Settings		Measurement Settings	Measurement Settings		Measurement Settings	Measurement Settings		Measurement Settings	Measurement Settings		Measurement Settings	Measurement Settings		Measurement Settings	Measurement Settings		Measurement Settings	Measurement Settings		Measurement Settings	Measurement Settings		Measurement Settings	Measurement Settings
MST-Power:	Medium		MST-Power:	Medium		MST-Power:	Medium		MST-Power:	Medium		MST-Power:	Medium		MST-Power:	Medium		MST-Power:	Medium		MST-Power:	Medium		MST-Power:	Medium		MST-Power:	Medium		MST-Power:	Medium		MST-Power:	Medium		MST-Power:	Medium		MST-Power:	Medium		MST-Power:	Medium		MST-Power:	Medium
Excitation-Power:	60		Excitation-Power:	60		Excitation-Power:	60		Excitation-Power:	60		Excitation-Power:	60		Excitation-Power:	60		Excitation-Power:	60		Excitation-Power:	60		Excitation-Power:	60		Excitation-Power:	60		Excitation-Power:	60		Excitation-Power:	60		Excitation-Power:	60		Excitation-Power:	60		Excitation-Power:	60		Excitation-Power:	60
Excitation type:	Nano - RED		Excitation type:	Nano - RED		Excitation type:	Nano - RED		Excitation type:	Nano - RED		Excitation type:	Nano - RED		Excitation type:	Nano - RED		Excitation type:	Nano - RED		Excitation type:	Nano - RED		Excitation type:	Nano - RED		Excitation type:	Nano - RED		Excitation type:	Nano - RED		Excitation type:	Nano - RED		Excitation type:	Nano - RED		Excitation type:	Nano - RED		Excitation type:	Nano - RED		Excitation type:	Nano - RED
Thermostat Setpoint:	22		Thermostat Setpoint:	22		Thermostat Setpoint:	22		Thermostat Setpoint:	22		Thermostat Setpoint:	22		Thermostat Setpoint:	22		Thermostat Setpoint:	22		Thermostat Setpoint:	22		Thermostat Setpoint:	22		Thermostat Setpoint:	22		Thermostat Setpoint:	22		Thermostat Setpoint:	22		Thermostat Setpoint:	22		Thermostat Setpoint:	22		Thermostat Setpoint:	22		Thermostat Setpoint:	22
Included	Included		Included	Included		Included	Included		Included	Included		Included	Included		Included	Included		Included	Included		Included	Included		Included	Included		Included	Included		Included	Included		Included	Included		Included	Included		Included	Included		Included	Included		Included	Included
Time [s]	Normalized Fluorescence [-]		Time [s]	Normalized Fluorescence [-]		Time [s]	Normalized Fluorescence [-]		Time [s]	Normalized Fluorescence [-]		Time [s]	Normalized Fluorescence [-]		Time [s]	Normalized Fluorescence [-]		Time [s]	Normalized Fluorescence [-]		Time [s]	Normalized Fluorescence [-]		Time [s]	Normalized Fluorescence [-]		Time [s]	Normalized Fluorescence [-]		Time [s]	Normalized Fluorescence [-]		Time [s]	Normalized Fluorescence [-]		Time [s]	Normalized Fluorescence [-]		Time [s]	Normalized Fluorescence [-]		Time [s]	Normalized Fluorescence [-]		Time [s]	Normalized Fluorescence [-]
-3.57675	0.999878		-3.57675	0.999538		-3.57675	1.001		-3.57675	1.00132		-3.57675	0.999997		-3.57675	1.00003		-3.57675	1.00038		-3.57675	1.00037		-3.57675	0.998863		-3.57675	0.999746		-3.57675	1.0008		-3.57675	1.00008		-3.57675	0.999963		-3.57675	0.999664		-3.57675	0.999856		-3.57675	0.999785
-3.50223	0.999034		-3.50223	0.999683		-3.50223	1.00068		-3.50223	0.99961		-3.50223	1.00017		-3.50223	0.998282		-3.50223	1.00011		-3.50223	1		-3.50223	0.999078		-3.50223	0.999908		-3.50223	0.999498		-3.50223	0.99964		-3.50223	0.999598		-3.50223	1.00009		-3.50223	0.998421		-3.50223	1.00112
-3.42772	1.00095		-3.42772	0.999157		-3.42772	0.999732		-3.42772	1.00005		-3.42772	1.00092		-3.42772	1.00003		-3.42772	0.998939		-3.42772	0.999271		-3.42772	1.00014		-3.42772	1.00027		-3.42772	0.999259		-3.42772	0.999838		-3.42772	0.998476		-3.42772	1.00031		-3.42772	0.999993		-3.42772	0.99909
-3.3532	0.999994		-3.3532	0.999217		-3.3532	0.999205		-3.3532	1.0005		-3.3532	0.999855		-3.3532	0.999419		-3.3532	1.0002		-3.3532	1.00023		-3.3532	0.999541		-3.3532	0.999101		-3.3532	0.999684		-3.3532	0.998525		-3.3532	1.00099		-3.3532	0.999659		-3.3532	0.998897		-3.3532	0.999705
-3.27869	0.999912		-3.27869	0.998715		-3.27869	1.0003		-3.27869	0.999802		-3.27869	0.999544		-3.27869	0.999735		-3.27869	0.998733		-3.27869	0.999203		-3.27869	0.999543		-3.27869	0.999585		-3.27869	0.999641		-3.27869	0.999897		-3.27869	0.999047		-3.27869	0.999507		-3.27869	0.999352		-3.27869	0.997879
-3.20417	0.999569		-3.20417	0.999893		-3.20417	0.998131		-3.20417	0.999686		-3.20417	0.999566		-3.20417	0.999648		-3.20417	0.999592		-3.20417	0.999129		-3.20417	0.999428		-3.20417	1.00073		-3.20417	0.999913		-3.20417	0.999541		-3.20417	1.00052		-3.20417	1.00044		-3.20417	1.00023		-3.20417	0.999439
-3.12966	0.999676		-3.12966	0.998729		-3.12966	1.0005		-3.12966	0.999044		-3.12966	0.999755		-3.12966	0.999768		-3.12966	0.998887		-3.12966	0.99893		-3.12966	1.00035		-3.12966	0.998692		-3.12966	0.999724		-3.12966	0.999754		-3.12966	1.0001		-3.12966	0.999068		-3.12966	1.00008		-3.12966	1.0001
-3.05514	0.998146		-3.05514	0.999373		-3.05514	1.00007		-3.05514	1.00058		-3.05514	1.00037		-3.05514	1.00044		-3.05514	0.999044		-3.05514	1.00048		-3.05514	0.999418		-3.05514	0.998256		-3.05514	0.99881		-3.05514	0.998774		-3.05514	0.999233		-3.05514	0.99922		-3.05514	1.00101		-3.05514	0.999584
-2.98062	0.99776		-2.98062	0.999876		-2.98062	0.999119		-2.98062	1.00032		-2.98062	0.998855		-2.98062	0.999084		-2.98062	0.999093		-2.98062	0.999605		-2.98062	1.0004		-2.98062	1.00027		-2.98062	0.998431		-2.98062	0.999922		-2.98062	0.999321		-2.98062	0.999592		-2.98062	0.999038		-2.98062	0.999071
-2.90611	0.999758		-2.90611	0.999159		-2.90611	0.999477		-2.90611	0.999675		-2.90611	0.999799		-2.90611	0.999485		-2.90611	0.999235		-2.90611	1.00033		-2.90611	0.999399		-2.90611	0.99997		-2.90611	0.999189		-2.90611	0.998931		-2.90611	1.00015		-2.90611	0.998681		-2.90611	0.999333		-2.90611	0.999054
-2.83159	0.999955		-2.83159	1.0001		-2.83159	0.999398		-2.83159	0.998645		-2.83159	0.999394		-2.83159	0.999512		-2.83159	0.998838		-2.83159	0.998802		-2.83159	0.999626		-2.83159	0.9994		-2.83159	0.999907		-2.83159	0.998959		-2.83159	0.999483		-2.83159	0.999811		-2.83159	1.00037		-2.83159	0.999513
-2.75708	0.998551		-2.75708	0.998531		-2.75708	0.999102		-2.75708	0.99904		-2.75708	0.999654		-2.75708	0.999027		-2.75708	1.00032		-2.75708	0.999647		-2.75708	0.999108		-2.75708	0.999774		-2.75708	0.999061		-2.75708	0.999437		-2.75708	0.999287		-2.75708	0.99987		-2.75708	0.999913		-2.75708	0.99895
-2.68256	0.998768		-2.68256	0.998642		-2.68256	0.99915		-2.68256	0.998536		-2.68256	0.999227		-2.68256	0.999569		-2.68256	0.999447		-2.68256	0.997847		-2.68256	0.999137		-2.68256	0.999884		-2.68256	0.999449		-2.68256	0.998766		-2.68256	0.998525		-2.68256	1.00006		-2.68256	1.00074		-2.68256	0.998884
-2.60805	0.999174		-2.60805	0.998628		-2.60805	0.997621		-2.60805	0.999004		-2.60805	0.998605		-2.60805	0.998986		-2.60805	1.00081		-2.60805	0.999531		-2.60805	0.999783		-2.60805	1.00021		-2.60805	0.999608		-2.60805	1.00013		-2.60805	0.999436		-2.60805	0.998741		-2.60805	1.00008		-2.60805	0.998653
-2.53353	0.999043		-2.53353	0.998957		-2.53353	0.998503		-2.53353	0.998931		-2.53353	0.999627		-2.53353	0.99913		-2.53353	0.997996		-2.53353	0.999746		-2.53353	0.999825		-2.53353	0.999901		-2.53353	0.99889		-2.53353	0.999467		-2.53353	0.998322		-2.53353	1.0001		-2.53353	0.999094		-2.53353	0.999408
-2.45901	0.99955		-2.45901	0.999258		-2.45901	0.998957		-2.45901	0.998471		-2.45901	0.998968		-2.45901	0.997677		-2.45901	0.999874		-2.45901	0.999968		-2.45901	0.998875		-2.45901	0.999214		-2.45901	0.999116		-2.45901	0.999449		-2.45901	0.99936		-2.45901	0.999377		-2.45901	0.998923		-2.45901	0.998785
-2.3845	0.998517		-2.3845	0.998835		-2.3845	0.998702		-2.3845	0.997245		-2.3845	1.00074		-2.3845	0.999291		-2.3845	1.00023		-2.3845	0.999864		-2.3845	0.998621		-2.3845	0.999533		-2.3845	0.998465		-2.3845	0.999401		-2.3845	0.999201		-2.3845	0.998647		-2.3845	0.999459		-2.3845	0.999441
-2.30998	1.00055		-2.30998	0.998488		-2.30998	0.999074		-2.30998	0.997155		-2.30998	0.999147		-2.30998	0.998601		-2.30998	1		-2.30998	0.999699		-2.30998	1.00068		-2.30998	0.999533		-2.30998	0.99797		-2.30998	0.999371		-2.30998	0.999781		-2.30998	0.998947		-2.30998	0.999431		-2.30998	0.998804
-2.23547	1.00053		-2.23547	0.9999		-2.23547	0.998758		-2.23547	0.999207		-2.23547	0.999487		-2.23547	0.998509		-2.23547	0.998849		-2.23547	0.999764		-2.23547	0.998021		-2.23547	0.999578		-2.23547	0.999739		-2.23547	0.999983		-2.23547	0.998405		-2.23547	0.998208		-2.23547	0.999294		-2.23547	0.998791
-2.16095	0.998981		-2.16095	0.999971		-2.16095	0.997979		-2.16095	0.996807		-2.16095	0.999289		-2.16095	0.999215		-2.16095	0.999186		-2.16095	0.999167		-2.16095	0.999262		-2.16095	0.999345		-2.16095	0.999006		-2.16095	1.0001		-2.16095	0.998113		-2.16095	0.999592		-2.16095	0.999311		-2.16095	0.998516
-2.08644	0.999318		-2.08644	0.999044		-2.08644	0.999615		-2.08644	0.998692		-2.08644	0.999085		-2.08644	0.999133		-2.08644	0.999459		-2.08644	0.999643		-2.08644	0.999164		-2.08644	1.00003		-2.08644	0.998596		-2.08644	0.999363		-2.08644	1.00007		-2.08644	0.998969		-2.08644	1.00044		-2.08644	0.998818
-2.01192	0.999951		-2.01192	0.998327		-2.01192	0.997046		-2.01192	0.996963		-2.01192	1.0003		-2.01192	0.997974		-2.01192	0.999842		-2.01192	0.998758		-2.01192	0.99833		-2.01192	1.00045		-2.01192	0.99863		-2.01192	0.999833		-2.01192	0.999453		-2.01192	0.998896		-2.01192	0.999622		-2.01192	0.998305
-1.93741	0.998266		-1.93741	0.998865		-1.93741	0.998699		-1.93741	0.997376		-1.93741	0.998583		-1.93741	0.997595		-1.93741	0.999209		-1.93741	0.99888		-1.93741	0.997884		-1.93741	0.998414		-1.93741	0.998508		-1.93741	0.998779		-1.93741	0.999382		-1.93741	0.999464		-1.93741	1.00047		-1.93741	0.999005
-1.86289	0.999256		-1.86289	0.997887		-1.86289	0.9981		-1.86289	0.997191		-1.86289	0.998465		-1.86289	0.99687		-1.86289	0.999528		-1.86289	0.998726		-1.86289	0.999746		-1.86289	1.00059		-1.86289	0.998456		-1.86289	0.999571		-1.86289	0.998733		-1.86289	0.999348		-1.86289	0.998899		-1.86289	0.999238
-1.78837	0.998725		-1.78837	0.997427		-1.78837	0.998406		-1.78837	0.99821		-1.78837	0.999394		-1.78837	1.00001		-1.78837	0.999633		-1.78837	0.99986		-1.78837	0.998031		-1.78837	0.999042		-1.78837	0.99855		-1.78837	1.00013		-1.78837	0.998343		-1.78837	0.998593		-1.78837	0.999661		-1.78837	0.998192
-1.71386	0.998102		-1.71386	0.999702		-1.71386	0.995903		-1.71386	0.997075		-1.71386	0.998749		-1.71386	0.999389		-1.71386	0.999833		-1.71386	0.999049		-1.71386	0.998166		-1.71386	0.999616		-1.71386	0.998569		-1.71386	0.998621		-1.71386	0.998625		-1.71386	0.998528		-1.71386	0.999235		-1.71386	0.998763
-1.63934	0.999854		-1.63934	0.997922		-1.63934	0.998737		-1.63934	0.999581		-1.63934	0.998543		-1.63934	0.998181		-1.63934	0.998992		-1.63934	0.998786		-1.63934	0.998251		-1.63934	0.999616		-1.63934	0.997893		-1.63934	0.997653		-1.63934	0.999071		-1.63934	0.998302		-1.63934	0.998899		-1.63934	0.998489
-1.56483	0.997871		-1.56483	0.998814		-1.56483	0.997453		-1.56483	0.999167		-1.56483	0.998529		-1.56483	0.998519		-1.56483	0.999735		-1.56483	0.998796		-1.56483	0.998782		-1.56483	1.00019		-1.56483	0.999174		-1.56483	0.999302		-1.56483	0.998219		-1.56483	0.998716		-1.56483	0.999758		-1.56483	0.998272
-1.49031	0.998928		-1.49031	0.998448		-1.49031	0.997614		-1.49031	0.997905		-1.49031	0.997783		-1.49031	0.998225		-1.49031	0.998559		-1.49031	0.99862		-1.49031	0.998714		-1.49031	0.999619		-1.49031	0.999146		-1.49031	0.998077		-1.49031	0.998667		-1.49031	0.998049		-1.49031	0.998558		-1.49031	0.997764
-1.4158	0.998778		-1.4158	0.997864		-1.4158	0.998124		-1.4158	0.998504		-1.4158	0.998301		-1.4158	0.997977		-1.4158	0.999575		-1.4158	0.99891		-1.4158	0.998885		-1.4158	1.0004		-1.4158	0.998923		-1.4158	0.99935		-1.4158	0.998603		-1.4158	0.998347		-1.4158	0.998137		-1.4158	0.998288
-1.34128	0.997856		-1.34128	0.997846		-1.34128	0.997935		-1.34128	0.996604		-1.34128	0.998735		-1.34128	0.997794		-1.34128	0.998507		-1.34128	0.999273		-1.34128	0.997762		-1.34128	0.9985		-1.34128	0.999366		-1.34128	0.999848		-1.34128	0.998248		-1.34128	0.99845		-1.34128	0.999005		-1.34128	0.996547
-1.26677	0.997702		-1.26677	0.997756		-1.26677	0.997026		-1.26677	0.997474		-1.26677	0.998465		-1.26677	0.998132		-1.26677	0.998774		-1.26677	0.997581		-1.26677	0.998261		-1.26677	0.999554		-1.26677	0.998248		-1.26677	0.999173		-1.26677	0.999745		-1.26677	0.997886		-1.26677	0.999344		-1.26677	0.997632
-1.19225	0.999019		-1.19225	0.997729		-1.19225	0.997218		-1.19225	0.997739		-1.19225	0.999254		-1.19225	0.999239		-1.19225	0.998719		-1.19225	0.99842		-1.19225	0.996673		-1.19225	0.998229		-1.19225	0.997817		-1.19225	0.998766		-1.19225	0.998201		-1.19225	0.999339		-1.19225	0.999107		-1.19225	0.99845
-1.11773	0.998339		-1.11773	0.996809		-1.11773	0.998313		-1.11773	0.997296		-1.11773	0.998225		-1.11773	0.997186		-1.11773	0.998794		-1.11773	0.998374		-1.11773	0.997904		-1.11773	0.999159		-1.11773	0.998844		-1.11773	0.99793		-1.11773	0.997822		-1.11773	0.998595		-1.11773	0.998979		-1.11773	0.99594
-1.04322	0.997905		-1.04322	0.996807		-1.04322	0.997401		-1.04322	0.99656		-1.04322	0.998906		-1.04322	0.998367		-1.04322	0.99775		-1.04322	0.998462		-1.04322	0.997725		-1.04322	0.997875		-1.04322	0.99757		-1.04322	0.998598		-1.04322	0.99743		-1.04322	0.999135		-1.04322	0.997946		-1.04322	0.997607
-0.968703	0.998542		-0.968703	0.9978		-0.968703	0.996578		-0.968703	0.99784		-0.968703	0.999198		-0.968703	0.996965		-0.968703	0.997105		-0.968703	0.998201		-0.968703	0.997097		-0.968703	1.00021		-0.968703	0.998575		-0.968703	0.998685		-0.968703	0.998603		-0.968703	0.998405		-0.968703	0.998393		-0.968703	0.997324
-0.894187	0.99871		-0.894187	0.997759		-0.894187	0.997707		-0.894187	0.9959		-0.894187	0.999759		-0.894187	0.996837		-0.894187	0.998406		-0.894187	0.997715		-0.894187	0.998506		-0.894187	0.999012		-0.894187	0.997405		-0.894187	0.99853		-0.894187	0.99788		-0.894187	0.998253		-0.894187	0.998688		-0.894187	0.997423
-0.819672	0.997335		-0.819672	0.997149		-0.819672	0.996137		-0.819672	0.996673		-0.819672	0.998941		-0.819672	0.997933		-0.819672	0.998185		-0.819672	0.997677		-0.819672	0.998286		-0.819672	0.999503		-0.819672	0.998404		-0.819672	0.998245		-0.819672	0.998018		-0.819672	0.997769		-0.819672	0.998334		-0.819672	0.997335
-0.745156	0.997972		-0.745156	0.997476		-0.745156	0.997611		-0.745156	0.996774		-0.745156	0.998406		-0.745156	0.997385		-0.745156	0.999079		-0.745156	0.998161		-0.745156	0.997606		-0.745156	0.997916		-0.745156	0.997127		-0.745156	0.998304		-0.745156	0.998101		-0.745156	0.997534		-0.745156	0.99927		-0.745156	0.996945
-0.67064	0.997224		-0.67064	0.997103		-0.67064	0.996392		-0.67064	0.996067		-0.67064	0.998183		-0.67064	0.997334		-0.67064	0.9984		-0.67064	0.998564		-0.67064	0.997708		-0.67064	0.999259		-0.67064	0.997221		-0.67064	0.99855		-0.67064	0.998537		-0.67064	0.998824		-0.67064	0.998276		-0.67064	0.996281
-0.596125	0.997287		-0.596125	0.99622		-0.596125	0.996516		-0.596125	0.996992		-0.596125	0.998418		-0.596125	0.996786		-0.596125	0.996984		-0.596125	0.997891		-0.596125	0.997862		-0.596125	0.999259		-0.596125	0.997123		-0.596125	0.997976		-0.596125	0.997253		-0.596125	0.998092		-0.596125	0.99892		-0.596125	0.997291
-0.521609	0.997036		-0.521609	0.997416		-0.521609	0.996378		-0.521609	0.997329		-0.521609	0.998825		-0.521609	0.995812		-0.521609	0.997552		-0.521609	0.998556		-0.521609	0.997481		-0.521609	0.99883		-0.521609	0.997389		-0.521609	0.998827		-0.521609	0.998468		-0.521609	0.997516		-0.521609	0.998823		-0.521609	0.996506
-0.447094	0.997475		-0.447094	0.996579		-0.447094	0.997415		-0.447094	0.997122		-0.447094	0.998122		-0.447094	0.996516		-0.447094	0.998202		-0.447094	0.998169		-0.447094	0.995952		-0.447094	0.999832		-0.447094	0.996714		-0.447094	0.998456		-0.447094	0.997734		-0.447094	0.996529		-0.447094	0.998992		-0.447094	0.997536
-0.372578	0.998262		-0.372578	0.996825		-0.372578	0.997208		-0.372578	0.99701		-0.372578	0.998766		-0.372578	0.998909		-0.372578	0.997811		-0.372578	0.998167		-0.372578	0.997388		-0.372578	0.999001		-0.372578	0.997414		-0.372578	0.998306		-0.372578	0.99827		-0.372578	0.99847		-0.372578	0.998336		-0.372578	0.996481
-0.298063	0.997432		-0.298063	0.99665		-0.298063	0.996905		-0.298063	0.997162		-0.298063	0.998342		-0.298063	0.995474		-0.298063	0.998188		-0.298063	0.997771		-0.298063	0.997794		-0.298063	0.99931		-0.298063	0.997921		-0.298063	0.997801		-0.298063	0.997359		-0.298063	0.998367		-0.298063	0.99854		-0.298063	0.997308
-0.223547	0.997181		-0.223547	0.995477		-0.223547	0.996478		-0.223547	0.99644		-0.223547	0.998053		-0.223547	0.99603		-0.223547	0.997631		-0.223547	0.997663		-0.223547	0.997755		-0.223547	0.998679		-0.223547	0.996491		-0.223547	0.998194		-0.223547	0.996876		-0.223547	0.997718		-0.223547	0.998124		-0.223547	0.996753
-0.149031	0.996187		-0.149031	0.996119		-0.149031	0.996433		-0.149031	0.997789		-0.149031	0.997744		-0.149031	0.99642		-0.149031	0.998475		-0.149031	0.99845		-0.149031	0.9973		-0.149031	0.998919		-0.149031	0.996442		-0.149031	0.996812		-0.149031	0.997432		-0.149031	0.997789		-0.149031	0.997796		-0.149031	0.996506
-0.0745156	0.997885		-0.0745156	0.996082		-0.0745156	0.996792		-0.0745156	0.996408		-0.0745156	0.998801		-0.0745156	0.996461		-0.0745156	0.997532		-0.0745156	0.998868		-0.0745156	0.99718		-0.0745156	0.997961		-0.0745156	0.99669		-0.0745156	0.996556		-0.0745156	0.997734		-0.0745156	0.998118		-0.0745156	0.998797		-0.0745156	0.995935
0	0.996853		0	0.995004		0	0.996595		0	0.994606		0	0.997298		0	0.996565		0	0.997523		0	0.996583		0	0.996079		0	0.996522		0	0.995969		0	0.99636		0	0.995828		0	0.995875		0	0.998376		0	0.995798
0.0745156	0.97742		0.0745156	0.97491		0.0745156	0.976254		0.0745156	0.977694		0.0745156	0.979391		0.0745156	0.976734		0.0745156	0.978702		0.0745156	0.979719		0.0745156	0.977681		0.0745156	0.977141		0.0745156	0.977587		0.0745156	0.980117		0.0745156	0.979225		0.0745156	0.979216		0.0745156	0.980719		0.0745156	0.977952
0.149031	0.965723		0.149031	0.96572		0.149031	0.966599		0.149031	0.966972		0.149031	0.969961		0.149031	0.967502		0.149031	0.969959		0.149031	0.970853		0.149031	0.966764		0.149031	0.967609		0.149031	0.967782		0.149031	0.968907		0.149031	0.969598		0.149031	0.968485		0.149031	0.972044		0.149031	0.968693
0.223547	0.960024		0.223547	0.960744		0.223547	0.961194		0.223547	0.961889		0.223547	0.964562		0.223547	0.960444		0.223547	0.966869		0.223547	0.964831		0.223547	0.962084		0.223547	0.962904		0.223547	0.962689		0.223547	0.965797		0.223547	0.964397		0.223547	0.96322		0.223547	0.965935		0.223547	0.962586
0.298062	0.955329		0.298062	0.955694		0.298062	0.955268		0.298062	0.957954		0.298062	0.958718		0.298062	0.955212		0.298062	0.962931		0.298062	0.96142		0.298062	0.955989		0.298062	0.95821		0.298062	0.959209		0.298062	0.96004		0.298062	0.960438		0.298062	0.958853		0.298062	0.960647		0.298062	0.957918
0.372578	0.951275		0.372578	0.951382		0.372578	0.952493		0.372578	0.95583		0.372578	0.955413		0.372578	0.949961		0.372578	0.960024		0.372578	0.957566		0.372578	0.953782		0.372578	0.954928		0.372578	0.955509		0.372578	0.956899		0.372578	0.957101		0.372578	0.953257		0.372578	0.957477		0.372578	0.953484
0.447093	0.948664		0.447093	0.949046		0.447093	0.948919		0.447093	0.952037		0.447093	0.951983		0.447093	0.94732		0.447093	0.958088		0.447093	0.955481		0.447093	0.948535		0.447093	0.95102		0.447093	0.952909		0.447093	0.954544		0.447093	0.953625		0.447093	0.950473		0.447093	0.954924		0.447093	0.949801
0.521609	0.945813		0.521609	0.945829		0.521609	0.945397		0.521609	0.947831		0.521609	0.949583		0.521609	0.94244		0.521609	0.955024		0.521609	0.952848		0.521609	0.947118		0.521609	0.948695		0.521609	0.950709		0.521609	0.952257		0.521609	0.951442		0.521609	0.948462		0.521609	0.950997		0.521609	0.946965
0.596125	0.942579		0.596125	0.944748		0.596125	0.943101		0.596125	0.946906		0.596125	0.94703		0.596125	0.939713		0.596125	0.954525		0.596125	0.951017		0.596125	0.944314		0.596125	0.947037		0.596125	0.948735		0.596125	0.950034		0.596125	0.947476		0.596125	0.945591		0.596125	0.948452		0.596125	0.944439
0.67064	0.938193		0.67064	0.941071		0.67064	0.939933		0.67064	0.94443		0.67064	0.944591		0.67064	0.937876		0.67064	0.952186		0.67064	0.948816		0.67064	0.942308		0.67064	0.945608		0.67064	0.946676		0.67064	0.948124		0.67064	0.947084		0.67064	0.942837		0.67064	0.945168		0.67064	0.942094
0.745156	0.938627		0.745156	0.939066		0.745156	0.938504		0.745156	0.942221		0.745156	0.942642		0.745156	0.935392		0.745156	0.950337		0.745156	0.94735		0.745156	0.940297		0.745156	0.94102		0.745156	0.945081		0.745156	0.946149		0.745156	0.943775		0.745156	0.940996		0.745156	0.943969		0.745156	0.942105
0.819672	0.934709		0.819672	0.937042		0.819672	0.937178		0.819672	0.942896		0.819672	0.940168		0.819672	0.930441		0.819672	0.94929		0.819672	0.944382		0.819672	0.938391		0.819672	0.939173		0.819672	0.943382		0.819672	0.943111		0.819672	0.941724		0.819672	0.939543		0.819672	0.941392		0.819672	0.938944
0.894187	0.931664		0.894187	0.936405		0.894187	0.934575		0.894187	0.940644		0.894187	0.938076		0.894187	0.928623		0.894187	0.948866		0.894187	0.943328		0.894187	0.937126		0.894187	0.938229		0.894187	0.941931		0.894187	0.941586		0.894187	0.938951		0.894187	0.938239		0.894187	0.939588		0.894187	0.938118
0.968703	0.932238		0.968703	0.934411		0.968703	0.933181		0.968703	0.938733		0.968703	0.938179		0.968703	0.926161		0.968703	0.947749		0.968703	0.941842		0.968703	0.934797		0.968703	0.935979		0.968703	0.940501		0.968703	0.940872		0.968703	0.93752		0.968703	0.935957		0.968703	0.938833		0.968703	0.935844
1.04322	0.929507		1.04322	0.932118		1.04322	0.929941		1.04322	0.93795		1.04322	0.935134		1.04322	0.924203		1.04322	0.945178		1.04322	0.940142		1.04322	0.932879		1.04322	0.935502		1.04322	0.94088		1.04322	0.93837		1.04322	0.935735		1.04322	0.934679		1.04322	0.935737		1.04322	0.935169
1.11773	0.925724		1.11773	0.931125		1.11773	0.929934		1.11773	0.935503		1.11773	0.934053		1.11773	0.922758		1.11773	0.945575		1.11773	0.938858		1.11773	0.930723		1.11773	0.932601		1.11773	0.939214		1.11773	0.93713		1.11773	0.934742		1.11773	0.932448		1.11773	0.934521		1.11773	0.932316
1.19225	0.925386		1.19225	0.929688		1.19225	0.928289		1.19225	0.934596		1.19225	0.933815		1.19225	0.919937		1.19225	0.943225		1.19225	0.937264		1.19225	0.92999		1.19225	0.932377		1.19225	0.938866		1.19225	0.935999		1.19225	0.933172		1.19225	0.93097		1.19225	0.933418		1.19225	0.930855
1.26677	0.924681		1.26677	0.927926		1.26677	0.927149		1.26677	0.933505		1.26677	0.931393		1.26677	0.918061		1.26677	0.942061		1.26677	0.93597		1.26677	0.929703		1.26677	0.929888		1.26677	0.937155		1.26677	0.934546		1.26677	0.931751		1.26677	0.929251		1.26677	0.931836		1.26677	0.931099
1.34128	0.92404		1.34128	0.926011		1.34128	0.924088		1.34128	0.933581		1.34128	0.930385		1.34128	0.916393		1.34128	0.941275		1.34128	0.93419		1.34128	0.927164		1.34128	0.931244		1.34128	0.936376		1.34128	0.934048		1.34128	0.929252		1.34128	0.929074		1.34128	0.928816		1.34128	0.928224
1.4158	0.919518		1.4158	0.925242		1.4158	0.922535		1.4158	0.931695		1.4158	0.929785		1.4158	0.915147		1.4158	0.941922		1.4158	0.934857		1.4158	0.927073		1.4158	0.92667		1.4158	0.937091		1.4158	0.932417		1.4158	0.929154		1.4158	0.927233		1.4158	0.928308		1.4158	0.926678
1.49031	0.919031		1.49031	0.924212		1.49031	0.921575		1.49031	0.930869		1.49031	0.928591		1.49031	0.913165		1.49031	0.940608		1.49031	0.933703		1.49031	0.924485		1.49031	0.92551		1.49031	0.936229		1.49031	0.932165		1.49031	0.927868		1.49031	0.925329		1.49031	0.926869		1.49031	0.926733
1.56483	0.917187		1.56483	0.923003		1.56483	0.921957		1.56483	0.932645		1.56483	0.926497		1.56483	0.911739		1.56483	0.938536		1.56483	0.932105		1.56483	0.924551		1.56483	0.923415		1.56483	0.936126		1.56483	0.93108		1.56483	0.926641		1.56483	0.924857		1.56483	0.925924		1.56483	0.926327
1.63934	0.915633		1.63934	0.922736		1.63934	0.921368		1.63934	0.93105		1.63934	0.926803		1.63934	0.910785		1.63934	0.937453		1.63934	0.931129		1.63934	0.92345		1.63934	0.923065		1.63934	0.935362		1.63934	0.928928		1.63934	0.926117		1.63934	0.924483		1.63934	0.925013		1.63934	0.92539
1.71386	0.914335		1.71386	0.92145		1.71386	0.91891		1.71386	0.929643		1.71386	0.92547		1.71386	0.908156		1.71386	0.937151		1.71386	0.930044		1.71386	0.923142		1.71386	0.920548		1.71386	0.935615		1.71386	0.928669		1.71386	0.923706		1.71386	0.923768		1.71386	0.923847		1.71386	0.924163
1.78837	0.913163		1.78837	0.920374		1.78837	0.917884		1.78837	0.929947		1.78837	0.924244		1.78837	0.907303		1.78837	0.937683		1.78837	0.931015		1.78837	0.921439		1.78837	0.919493		1.78837	0.935368		1.78837	0.928026		1.78837	0.922604		1.78837	0.923155		1.78837	0.921973		1.78837	0.922194
1.86289	0.912989		1.86289	0.919178		1.86289	0.917161		1.86289	0.929045		1.86289	0.924435		1.86289	0.906245		1.86289	0.93642		1.86289	0.928884		1.86289	0.920668		1.86289	0.917629		1.86289	0.934191		1.86289	0.925943		1.86289	0.921171		1.86289	0.921283		1.86289	0.92077		1.86289	0.921884
1.93741	0.912029		1.93741	0.91827		1.93741	0.917742		1.93741	0.927438		1.93741	0.92306		1.93741	0.905054		1.93741	0.93445		1.93741	0.928219		1.93741	0.920132		1.93741	0.91551		1.93741	0.934598		1.93741	0.926781		1.93741	0.920372		1.93741	0.921444		1.93741	0.920271		1.93741	0.920077
2.01192	0.908487		2.01192	0.917019		2.01192	0.914816		2.01192	0.929541		2.01192	0.922675		2.01192	0.903595		2.01192	0.933794		2.01192	0.929006		2.01192	0.919863		2.01192	0.914435		2.01192	0.934567		2.01192	0.925661		2.01192	0.919385		2.01192	0.920044		2.01192	0.919557		2.01192	0.91949
2.08644	0.908279		2.08644	0.915584		2.08644	0.914675		2.08644	0.92829		2.08644	0.920704		2.08644	0.902434		2.08644	0.932355		2.08644	0.929171		2.08644	0.91747		2.08644	0.913295		2.08644	0.934249		2.08644	0.925775		2.08644	0.918856		2.08644	0.919744		2.08644	0.91911		2.08644	0.920077
2.16095	0.906537		2.16095	0.914478		2.16095	0.915177		2.16095	0.92725		2.16095	0.92357		2.16095	0.902011		2.16095	0.932288		2.16095	0.928065		2.16095	0.917967		2.16095	0.912664		2.16095	0.935841		2.16095	0.924042		2.16095	0.917814		2.16095	0.91931		2.16095	0.91794		2.16095	0.917749
2.23547	0.907242		2.23547	0.914011		2.23547	0.914647		2.23547	0.927961		2.23547	0.920709		2.23547	0.90182		2.23547	0.932102		2.23547	0.927166		2.23547	0.917155		2.23547	0.911496		2.23547	0.935585		2.23547	0.924113		2.23547	0.917839		2.23547	0.9183		2.23547	0.916578		2.23547	0.916757
2.30998	0.904235		2.30998	0.913894		2.30998	0.913824		2.30998	0.925741		2.30998	0.922018		2.30998	0.900068		2.30998	0.929708		2.30998	0.928462		2.30998	0.916281		2.30998	0.910723		2.30998	0.936153		2.30998	0.922688		2.30998	0.916183		2.30998	0.917162		2.30998	0.915541		2.30998	0.917301
2.3845	0.904163		2.3845	0.912109		2.3845	0.913032		2.3845	0.925759		2.3845	0.920338		2.3845	0.900201		2.3845	0.930318		2.3845	0.927819		2.3845	0.917037		2.3845	0.907526		2.3845	0.936352		2.3845	0.92279		2.3845	0.914978		2.3845	0.916193		2.3845	0.91452		2.3845	0.915091
2.45901	0.903584		2.45901	0.911891		2.45901	0.912168		2.45901	0.924755		2.45901	0.920127		2.45901	0.899661		2.45901	0.929412		2.45901	0.927		2.45901	0.915758		2.45901	0.908618		2.45901	0.938234		2.45901	0.922055		2.45901	0.91366		2.45901	0.915449		2.45901	0.914201		2.45901	0.915492
2.53353	0.902735		2.53353	0.910865		2.53353	0.913366		2.53353	0.92477		2.53353	0.921422		2.53353	0.900236		2.53353	0.928507		2.53353	0.926897		2.53353	0.915636		2.53353	0.906857		2.53353	0.939376		2.53353	0.920302		2.53353	0.914838		2.53353	0.91525		2.53353	0.914212		2.53353	0.914706
2.60805	0.900124		2.60805	0.909516		2.60805	0.910939		2.60805	0.924926		2.60805	0.920718		2.60805	0.898928		2.60805	0.929659		2.60805	0.926709		2.60805	0.914799		2.60805	0.905545		2.60805	0.939233		2.60805	0.919888		2.60805	0.913726		2.60805	0.914244		2.60805	0.913522		2.60805	0.914802
2.68256	0.899333		2.68256	0.909805		2.68256	0.911228		2.68256	0.925016		2.68256	0.92077		2.68256	0.899361		2.68256	0.929412		2.68256	0.925824		2.68256	0.914906		2.68256	0.904419		2.68256	0.938099		2.68256	0.920328		2.68256	0.911786		2.68256	0.914016		2.68256	0.912388		2.68256	0.913111
2.75708	0.898401		2.75708	0.908697		2.75708	0.911462		2.75708	0.925038		2.75708	0.920552		2.75708	0.899143		2.75708	0.927875		2.75708	0.926447		2.75708	0.913316		2.75708	0.904251		2.75708	0.940959		2.75708	0.918999		2.75708	0.911861		2.75708	0.913241		2.75708	0.911815		2.75708	0.913202
2.83159	0.898966		2.83159	0.908536		2.83159	0.910529		2.83159	0.925567		2.83159	0.920326		2.83159	0.89895		2.83159	0.92741		2.83159	0.926461		2.83159	0.914256		2.83159	0.903189		2.83159	0.940638		2.83159	0.920289		2.83159	0.911465		2.83159	0.911918		2.83159	0.911626		2.83159	0.912531
2.90611	0.898145		2.90611	0.90766		2.90611	0.910753		2.90611	0.924737		2.90611	0.921601		2.90611	0.899822		2.90611	0.928385		2.90611	0.92564		2.90611	0.914701		2.90611	0.902575		2.90611	0.941686		2.90611	0.919133		2.90611	0.91146		2.90611	0.912039		2.90611	0.91121		2.90611	0.911359
2.98062	0.89789		2.98062	0.907731		2.98062	0.910199		2.98062	0.925959		2.98062	0.921172		2.98062	0.899678		2.98062	0.927689		2.98062	0.92597		2.98062	0.913348		2.98062	0.901634		2.98062	0.942707		2.98062	0.918689		2.98062	0.911256		2.98062	0.911828		2.98062	0.91032		2.98062	0.911639
3.05514	0.89692		3.05514	0.906919		3.05514	0.9114		3.05514	0.925172		3.05514	0.920478		3.05514	0.89886		3.05514	0.927802		3.05514	0.926309		3.05514	0.913612		3.05514	0.902139		3.05514	0.943061		3.05514	0.918412		3.05514	0.910144		3.05514	0.91082		3.05514	0.908997		3.05514	0.911057
3.12966	0.895101		3.12966	0.906949		3.12966	0.910257		3.12966	0.925488		3.12966	0.921042		3.12966	0.899983		3.12966	0.928107		3.12966	0.926489		3.12966	0.913306		3.12966	0.900954		3.12966	0.945753		3.12966	0.917154		3.12966	0.910291		3.12966	0.911736		3.12966	0.908609		3.12966	0.910873
3.20417	0.895723		3.20417	0.906294		3.20417	0.910319		3.20417	0.926042		3.20417	0.920993		3.20417	0.899473		3.20417	0.928092		3.20417	0.925267		3.20417	0.912572		3.20417	0.900889		3.20417	0.945558		3.20417	0.917248		3.20417	0.90984		3.20417	0.909895		3.20417	0.90743		3.20417	0.910755
3.27869	0.896717		3.27869	0.906968		3.27869	0.91097		3.27869	0.925205		3.27869	0.922834		3.27869	0.899849		3.27869	0.928083		3.27869	0.925329		3.27869	0.912724		3.27869	0.901277		3.27869	0.946532		3.27869	0.917129		3.27869	0.909522		3.27869	0.909396		3.27869	0.907914		3.27869	0.910535
3.3532	0.896268		3.3532	0.905834		3.3532	0.910784		3.3532	0.924817		3.3532	0.921625		3.3532	0.89949		3.3532	0.927805		3.3532	0.925457		3.3532	0.912558		3.3532	0.899083		3.3532	0.947049		3.3532	0.916369		3.3532	0.909507		3.3532	0.910016		3.3532	0.90685		3.3532	0.910324
3.42772	0.896789		3.42772	0.905838		3.42772	0.910725		3.42772	0.926115		3.42772	0.921912		3.42772	0.899102		3.42772	0.928374		3.42772	0.925928		3.42772	0.913343		3.42772	0.900617		3.42772	0.947131		3.42772	0.916176		3.42772	0.909238		3.42772	0.909089		3.42772	0.907975		3.42772	0.909959
3.50223	0.896037		3.50223	0.905645		3.50223	0.910202		3.50223	0.926089		3.50223	0.921201		3.50223	0.898862		3.50223	0.928818		3.50223	0.926849		3.50223	0.913788		3.50223	0.900559		3.50223	0.948353		3.50223	0.915378		3.50223	0.909867		3.50223	0.909089		3.50223	0.904999		3.50223	0.911938
3.57675	0.895289		3.57675	0.90536		3.57675	0.91056		3.57675	0.925197		3.57675	0.922756		3.57675	0.89928		3.57675	0.929589		3.57675	0.927104		3.57675	0.912719		3.57675	0.899866		3.57675	0.948509		3.57675	0.916539		3.57675	0.908277		3.57675	0.909844		3.57675	0.90553		3.57675	0.910755
3.65126	0.894044		3.65126	0.906078		3.65126	0.910064		3.65126	0.928276		3.65126	0.922037		3.65126	0.898772		3.65126	0.929563		3.65126	0.92597		3.65126	0.913434		3.65126	0.899477		3.65126	0.949022		3.65126	0.914687		3.65126	0.909314		3.65126	0.908628		3.65126	0.904143		3.65126	0.910604
3.72578	0.896654		3.72578	0.90625		3.72578	0.910299		3.72578	0.926884		3.72578	0.924136		3.72578	0.898241		3.72578	0.93064		3.72578	0.927598		3.72578	0.913191		3.72578	0.900672		3.72578	0.950076		3.72578	0.914545		3.72578	0.907954		3.72578	0.90861		3.72578	0.905114		3.72578	0.910703
3.8003	0.895525		3.8003	0.905139		3.8003	0.911366		3.8003	0.926684		3.8003	0.923967		3.8003	0.897941		3.8003	0.930321		3.8003	0.928187		3.8003	0.912418		3.8003	0.899941		3.8003	0.950003		3.8003	0.913577		3.8003	0.908696		3.8003	0.9079		3.8003	0.903833		3.8003	0.911159
3.87481	0.896659		3.87481	0.906565		3.87481	0.912564		3.87481	0.927221		3.87481	0.923942		3.87481	0.897592		3.87481	0.931032		3.87481	0.927851		3.87481	0.913749		3.87481	0.899807		3.87481	0.950419		3.87481	0.914054		3.87481	0.907351		3.87481	0.908863		3.87481	0.903681		3.87481	0.910815
3.94933	0.895699		3.94933	0.905933		3.94933	0.911521		3.94933	0.927855		3.94933	0.92494		3.94933	0.89922		3.94933	0.932224		3.94933	0.927949		3.94933	0.91292		3.94933	0.900961		3.94933	0.952075		3.94933	0.913328		3.94933	0.907295		3.94933	0.908608		3.94933	0.902437		3.94933	0.911977
4.02384	0.896109		4.02384	0.90677		4.02384	0.911669		4.02384	0.928881		4.02384	0.926519		4.02384	0.899618		4.02384	0.933101		4.02384	0.928886		4.02384	0.913067		4.02384	0.899742		4.02384	0.952175		4.02384	0.912926		4.02384	0.907587		4.02384	0.908733		4.02384	0.903388		4.02384	0.91201
4.09836	0.897147		4.09836	0.905767		4.09836	0.911875		4.09836	0.929291		4.09836	0.926293		4.09836	0.900092		4.09836	0.933489		4.09836	0.92862		4.09836	0.913321		4.09836	0.900442		4.09836	0.953541		4.09836	0.912172		4.09836	0.908478		4.09836	0.908476		4.09836	0.90199		4.09836	0.911351
4.17287	0.896534		4.17287	0.905942		4.17287	0.912774		4.17287	0.929447		4.17287	0.927882		4.17287	0.899547		4.17287	0.934856		4.17287	0.928788		4.17287	0.912932		4.17287	0.899927		4.17287	0.953807		4.17287	0.911577		4.17287	0.908885		4.17287	0.907528		4.17287	0.903581		4.17287	0.912847
4.24739	0.89773		4.24739	0.905588		4.24739	0.913487		4.24739	0.929741		4.24739	0.92814		4.24739	0.899855		4.24739	0.935242		4.24739	0.930376		4.24739	0.913084		4.24739	0.900604		4.24739	0.953862		4.24739	0.911671		4.24739	0.909213		4.24739	0.908644		4.24739	0.902708		4.24739	0.91145
4.3219	0.899197		4.3219	0.906986		4.3219	0.91275		4.3219	0.930879		4.3219	0.929022		4.3219	0.900962		4.3219	0.93606		4.3219	0.930006		4.3219	0.913328		4.3219	0.901503		4.3219	0.953981		4.3219	0.912685		4.3219	0.909772		4.3219	0.909893		4.3219	0.902715		4.3219	0.912317
4.39642	0.897692		4.39642	0.907225		4.39642	0.912712		4.39642	0.930945		4.39642	0.930236		4.39642	0.900667		4.39642	0.935692		4.39642	0.929559		4.39642	0.914243		4.39642	0.901514		4.39642	0.95466		4.39642	0.911333		4.39642	0.908797		4.39642	0.909331		4.39642	0.901564		4.39642	0.911614
4.47094	0.898667		4.47094	0.907188		4.47094	0.91369		4.47094	0.932569		4.47094	0.929959		4.47094	0.901594		4.47094	0.936139		4.47094	0.931784		4.47094	0.91396		4.47094	0.902595		4.47094	0.957309		4.47094	0.912001		4.47094	0.909115		4.47094	0.91026		4.47094	0.902504		4.47094	0.91232
4.54545	0.899516		4.54545	0.907908		4.54545	0.91441		4.54545	0.932721		4.54545	0.93179		4.54545	0.901949		4.54545	0.937656		4.54545	0.931806		4.54545	0.914794		4.54545	0.903399		4.54545	0.957021		4.54545	0.910942		4.54545	0.90902		4.54545	0.90971		4.54545	0.902024		4.54545	0.911233
4.61997	0.898889		4.61997	0.908515		4.61997	0.914065		4.61997	0.934041		4.61997	0.932033		4.61997	0.902077		4.61997	0.937537		4.61997	0.932603		4.61997	0.915474		4.61997	0.903619		4.61997	0.958152		4.61997	0.911425		4.61997	0.90984		4.61997	0.910751		4.61997	0.901881		4.61997	0.911367
4.69448	0.900418		4.69448	0.908191		4.69448	0.915146		4.69448	0.934349		4.69448	0.931682		4.69448	0.901482		4.69448	0.938948		4.69448	0.932417		4.69448	0.916624		4.69448	0.904834		4.69448	0.957794		4.69448	0.910937		4.69448	0.909818		4.69448	0.912386		4.69448	0.901875		4.69448	0.913655
4.769	0.901195		4.769	0.90883		4.769	0.915659		4.769	0.934237		4.769	0.933543		4.769	0.902175		4.769	0.939508		4.769	0.933743		4.769	0.917192		4.769	0.90629		4.769	0.959426		4.769	0.911923		4.769	0.908704		4.769	0.911306		4.769	0.902302		4.769	0.913762
4.84351	0.900862		4.84351	0.910435		4.84351	0.916568		4.84351	0.935698		4.84351	0.933195		4.84351	0.90308		4.84351	0.941339		4.84351	0.933995		4.84351	0.916646		4.84351	0.904628		4.84351	0.962536		4.84351	0.912804		4.84351	0.909791		4.84351	0.911152		4.84351	0.901959		4.84351	0.913998
4.91803	0.903024		4.91803	0.910233		4.91803	0.916892		4.91803	0.935474		4.91803	0.934019		4.91803	0.903424		4.91803	0.941411		4.91803	0.935085		4.91803	0.917387		4.91803	0.906764		4.91803	0.962778		4.91803	0.911948		4.91803	0.909586		4.91803	0.911734		4.91803	0.902302		4.91803	0.913259
4.99255	0.902875		4.99255	0.910582		4.99255	0.919395		4.99255	0.936304		4.99255	0.935318		4.99255	0.904577		4.99255	0.940956		4.99255	0.934604		4.99255	0.918576		4.99255	0.906541		4.99255	0.962915		4.99255	0.912319		4.99255	0.910394		4.99255	0.912692		4.99255	0.901733		4.99255	0.913254
5.06706	0.904916		5.06706	0.910865		5.06706	0.919464		5.06706	0.937772		5.06706	0.934926		5.06706	0.904211		5.06706	0.943303		5.06706	0.93609		5.06706	0.918185		5.06706	0.908021		5.06706	0.963218		5.06706	0.912197		5.06706	0.910303		5.06706	0.913304		5.06706	0.902185		5.06706	0.912326
5.14158	0.905167		5.14158	0.911528		5.14158	0.920555		5.14158	0.9377		5.14158	0.937226		5.14158	0.903982		5.14158	0.944435		5.14158	0.93559		5.14158	0.919073		5.14158	0.909772		5.14158	0.964333		5.14158	0.912865		5.14158	0.91083		5.14158	0.913102		5.14158	0.90189		5.14158	0.912987
5.21609	0.905398		5.21609	0.912634		5.21609	0.921406		5.21609	0.939411		5.21609	0.937723		5.21609	0.906619		5.21609	0.946025		5.21609	0.936126		5.21609	0.919601		5.21609	0.909937		5.21609	0.965081		5.21609	0.912068		5.21609	0.911021		5.21609	0.914323		5.21609	0.902426		5.21609	0.914311
5.29061	0.909515		5.29061	0.91305		5.29061	0.922298		5.29061	0.939491		5.29061	0.938265		5.29061	0.906616		5.29061	0.946684		5.29061	0.936831		5.29061	0.920778		5.29061	0.910524		5.29061	0.964733		5.29061	0.912294		5.29061	0.911298		5.29061	0.914788		5.29061	0.902873		5.29061	0.914151
5.36512	0.908907		5.36512	0.913843		5.36512	0.924329		5.36512	0.939495		5.36512	0.940033		5.36512	0.907589		5.36512	0.947879		5.36512	0.937789		5.36512	0.921294		5.36512	0.911177		5.36512	0.96649		5.36512	0.912489		5.36512	0.911266		5.36512	0.915111		5.36512	0.903355		5.36512	0.913202
5.43964	0.909954		5.43964	0.913156		5.43964	0.923923		5.43964	0.941293		5.43964	0.941845		5.43964	0.90814		5.43964	0.949589		5.43964	0.937815		5.43964	0.922124		5.43964	0.913288		5.43964	0.965256		5.43964	0.91348		5.43964	0.912932		5.43964	0.914403		5.43964	0.902921		5.43964	0.913932
5.51415	0.911368		5.51415	0.914177		5.51415	0.924783		5.51415	0.942831		5.51415	0.940898		5.51415	0.908756		5.51415	0.949951		5.51415	0.938325		5.51415	0.922518		5.51415	0.914216		5.51415	0.9673		5.51415	0.913508		5.51415	0.911957		5.51415	0.916249		5.51415	0.902493		5.51415	0.915379
5.58867	0.914079		5.58867	0.91538		5.58867	0.926095		5.58867	0.943907		5.58867	0.942237		5.58867	0.910686		5.58867	0.94994		5.58867	0.940086		5.58867	0.92357		5.58867	0.914717		5.58867	0.967144		5.58867	0.912609		5.58867	0.91313		5.58867	0.91772		5.58867	0.902467		5.58867	0.915244
5.66319	0.91324		5.66319	0.917346		5.66319	0.927452		5.66319	0.943694		5.66319	0.943051		5.66319	0.912262		5.66319	0.951199		5.66319	0.940044		5.66319	0.925336		5.66319	0.917128		5.66319	0.967315		5.66319	0.913851		5.66319	0.912442		5.66319	0.917572		5.66319	0.903045		5.66319	0.91533
5.7377	0.916246		5.7377	0.917019		5.7377	0.929001		5.7377	0.945253		5.7377	0.944169		5.7377	0.911706		5.7377	0.952821		5.7377	0.941312		5.7377	0.925312		5.7377	0.917684		5.7377	0.968293		5.7377	0.913902		5.7377	0.913346		5.7377	0.918992		5.7377	0.902932		5.7377	0.91695
5.81222	0.917424		5.81222	0.918383		5.81222	0.928895		5.81222	0.944488		5.81222	0.945231		5.81222	0.913732		5.81222	0.954867		5.81222	0.942678		5.81222	0.925933		5.81222	0.919418		5.81222	0.970022		5.81222	0.913823		5.81222	0.914108		5.81222	0.919554		5.81222	0.903223		5.81222	0.917757
5.88673	0.918548		5.88673	0.919298		5.88673	0.930795		5.88673	0.947022		5.88673	0.946057		5.88673	0.914893		5.88673	0.955793		5.88673	0.942031		5.88673	0.927983		5.88673	0.920719		5.88673	0.970951		5.88673	0.912741		5.88673	0.915833		5.88673	0.920121		5.88673	0.902628		5.88673	0.91735
5.96125	0.918234		5.96125	0.919887		5.96125	0.930341		5.96125	0.947349		5.96125	0.947969		5.96125	0.915823		5.96125	0.954702		5.96125	0.942652		5.96125	0.928272		5.96125	0.921925		5.96125	0.970208		5.96125	0.914273		5.96125	0.915651		5.96125	0.920069		5.96125	0.902832		5.96125	0.917754
6.03576	0.921371		6.03576	0.921517		6.03576	0.931966		6.03576	0.94923		6.03576	0.948062		6.03576	0.91648		6.03576	0.956901		6.03576	0.943028		6.03576	0.92917		6.03576	0.923363		6.03576	0.970334		6.03576	0.913993		6.03576	0.915076		6.03576	0.920302		6.03576	0.903572		6.03576	0.919973
6.11028	0.921907		6.11028	0.922736		6.11028	0.933784		6.11028	0.950764		6.11028	0.949242		6.11028	0.918165		6.11028	0.95951		6.11028	0.94417		6.11028	0.930188		6.11028	0.923978		6.11028	0.972867		6.11028	0.914476		6.11028	0.916609		6.11028	0.92245		6.11028	0.904017		6.11028	0.919311
6.18479	0.923803		6.18479	0.922614		6.18479	0.934279		6.18479	0.950543		6.18479	0.950455		6.18479	0.920648		6.18479	0.958158		6.18479	0.944574		6.18479	0.930508		6.18479	0.926279		6.18479	0.972882		6.18479	0.913983		6.18479	0.917464		6.18479	0.923047		6.18479	0.904851		6.18479	0.919989
6.25931	0.926443		6.25931	0.924658		6.25931	0.934882		6.25931	0.9524		6.25931	0.952561		6.25931	0.919607		6.25931	0.960375		6.25931	0.945119		6.25931	0.931952		6.25931	0.927192		6.25931	0.973352		6.25931	0.915401		6.25931	0.918081		6.25931	0.923791		6.25931	0.90515		6.25931	0.921016
6.33383	0.927138		6.33383	0.92496		6.33383	0.934758		6.33383	0.951925		6.33383	0.954329		6.33383	0.921962		6.33383	0.960534		6.33383	0.944242		6.33383	0.933442		6.33383	0.927474		6.33383	0.973239		6.33383	0.914212		6.33383	0.918775		6.33383	0.925343		6.33383	0.906321		6.33383	0.921571
6.40834	0.926197		6.40834	0.926383		6.40834	0.937189		6.40834	0.954289		6.40834	0.954697		6.40834	0.922197		6.40834	0.961994		6.40834	0.944648		6.40834	0.933647		6.40834	0.927151		6.40834	0.973352		6.40834	0.91535		6.40834	0.9196		6.40834	0.925833		6.40834	0.906462		6.40834	0.922636
6.48286	0.92901		6.48286	0.927811		6.48286	0.936345		6.48286	0.953556		6.48286	0.955692		6.48286	0.923917		6.48286	0.963146		6.48286	0.945908		6.48286	0.934817		6.48286	0.928624		6.48286	0.974223		6.48286	0.916791		6.48286	0.918449		6.48286	0.92736		6.48286	0.907232		6.48286	0.92547
6.55737	0.931403		6.55737	0.929538		6.55737	0.937041		6.55737	0.956192		6.55737	0.957119		6.55737	0.923901		6.55737	0.963909		6.55737	0.945588		6.55737	0.935668		6.55737	0.929266		6.55737	0.975956		6.55737	0.916649		6.55737	0.919417		6.55737	0.92848		6.55737	0.908281		6.55737	0.92474
6.63189	0.931302		6.63189	0.930417		6.63189	0.93868		6.63189	0.957559		6.63189	0.957852		6.63189	0.926172		6.63189	0.965377		6.63189	0.946777		6.63189	0.936573		6.63189	0.931117		6.63189	0.975714		6.63189	0.917116		6.63189	0.920303		6.63189	0.928538		6.63189	0.90707		6.63189	0.925665
6.7064	0.932692		6.7064	0.930929		6.7064	0.94006		6.7064	0.957545		6.7064	0.959578		6.7064	0.926417		6.7064	0.965197		6.7064	0.946531		6.7064	0.93834		6.7064	0.931203		6.7064	0.976408		6.7064	0.917629		6.7064	0.920605		6.7064	0.930471		6.7064	0.908396		6.7064	0.927041
6.78092	0.933271		6.78092	0.931456		6.78092	0.940845		6.78092	0.95848		6.78092	0.962878		6.78092	0.927756		6.78092	0.966941		6.78092	0.946859		6.78092	0.939052		6.78092	0.932154		6.78092	0.97727		6.78092	0.919736		6.78092	0.921734		6.78092	0.931499		6.78092	0.909927		6.78092	0.927551
6.85544	0.936224		6.85544	0.934163		6.85544	0.94172		6.85544	0.958099		6.85544	0.962736		6.85544	0.927914		6.85544	0.967342		6.85544	0.948055		6.85544	0.94094		6.85544	0.934015		6.85544	0.977355		6.85544	0.920312		6.85544	0.921996		6.85544	0.93297		6.85544	0.911188		6.85544	0.928507
6.92995	0.938063		6.92995	0.935388		6.92995	0.941778		6.92995	0.960388		6.92995	0.96341		6.92995	0.929989		6.92995	0.969831		6.92995	0.948117		6.92995	0.942447		6.92995	0.935052		6.92995	0.977526		6.92995	0.920894		6.92995	0.923175		6.92995	0.93415		6.92995	0.912232		6.92995	0.929649
7.00447	0.939375		7.00447	0.936042		7.00447	0.943459		7.00447	0.961588		7.00447	0.966475		7.00447	0.930477		7.00447	0.969849		7.00447	0.948289		7.00447	0.94427		7.00447	0.936182		7.00447	0.979271		7.00447	0.921458		7.00447	0.92362		7.00447	0.93572		7.00447	0.911527		7.00447	0.930075
7.07898	0.940659		7.07898	0.93612		7.07898	0.944089		7.07898	0.963194		7.07898	0.966269		7.07898	0.930035		7.07898	0.97193		7.07898	0.949185		7.07898	0.945447		7.07898	0.936162		7.07898	0.980087		7.07898	0.920394		7.07898	0.924938		7.07898	0.937404		7.07898	0.913908		7.07898	0.930756
7.1535	0.94145		7.1535	0.93809		7.1535	0.945314		7.1535	0.963339		7.1535	0.968316		7.1535	0.932131		7.1535	0.972286		7.1535	0.94882		7.1535	0.94495		7.1535	0.936477		7.1535	0.981355		7.1535	0.9211		7.1535	0.925009		7.1535	0.937608		7.1535	0.914661		7.1535	0.932362
7.22801	0.943525		7.22801	0.938081		7.22801	0.945631		7.22801	0.962936		7.22801	0.968983		7.22801	0.932167		7.22801	0.973134		7.22801	0.949745		7.22801	0.947485		7.22801	0.93863		7.22801	0.983952		7.22801	0.92346		7.22801	0.926298		7.22801	0.93884		7.22801	0.913352		7.22801	0.932516
7.30253	0.946493		7.30253	0.940105		7.30253	0.948017		7.30253	0.964688		7.30253	0.970361		7.30253	0.93169		7.30253	0.973845		7.30253	0.950334		7.30253	0.948268		7.30253	0.938984		7.30253	0.9843		7.30253	0.923371		7.30253	0.925992		7.30253	0.939854		7.30253	0.914915		7.30253	0.934828
7.37704	0.945663		7.37704	0.941105		7.37704	0.947852		7.37704	0.965029		7.37704	0.971405		7.37704	0.934495		7.37704	0.976125		7.37704	0.950513		7.37704	0.948789		7.37704	0.940959		7.37704	0.984633		7.37704	0.923671		7.37704	0.927734		7.37704	0.941377		7.37704	0.916782		7.37704	0.935166
7.45156	0.948553		7.45156	0.942423		7.45156	0.949594		7.45156	0.967853		7.45156	0.97346		7.45156	0.933593		7.45156	0.976607		7.45156	0.951756		7.45156	0.951862		7.45156	0.940591		7.45156	0.985855		7.45156	0.923572		7.45156	0.927427		7.45156	0.942304		7.45156	0.916902		7.45156	0.936069
7.52608	0.949731		7.52608	0.943573		7.52608	0.950348		7.52608	0.968325		7.52608	0.974141		7.52608	0.933339		7.52608	0.977338		7.52608	0.952806		7.52608	0.950895		7.52608	0.942871		7.52608	0.987215		7.52608	0.925478		7.52608	0.9285		7.52608	0.943242		7.52608	0.916552		7.52608	0.937522
7.60059	0.95113		7.60059	0.944585		7.60059	0.95365		7.60059	0.968104		7.60059	0.975455		7.60059	0.934064		7.60059	0.979648		7.60059	0.953929		7.60059	0.954162		7.60059	0.944585		7.60059	0.987789		7.60059	0.925343		7.60059	0.929216		7.60059	0.94446		7.60059	0.918137		7.60059	0.938326
7.67511	0.953162		7.67511	0.945856		7.67511	0.953192		7.67511	0.968346		7.67511	0.978361		7.67511	0.933598		7.67511	0.981436		7.67511	0.953627		7.67511	0.953927		7.67511	0.944983		7.67511	0.98935		7.67511	0.926812		7.67511	0.929274		7.67511	0.946261		7.67511	0.918246		7.67511	0.939642
7.74962	0.955729		7.74962	0.945741		7.74962	0.955382		7.74962	0.969307		7.74962	0.977633		7.74962	0.934577		7.74962	0.983368		7.74962	0.954592		7.74962	0.955451		7.74962	0.9458		7.74962	0.989167		7.74962	0.928087		7.74962	0.930752		7.74962	0.947412		7.74962	0.920399		7.74962	0.941223
7.82414	0.954716		7.82414	0.947898		7.82414	0.956497		7.82414	0.971135		7.82414	0.97865		7.82414	0.934547		7.82414	0.982649		7.82414	0.955536		7.82414	0.957266		7.82414	0.945546		7.82414	0.991107		7.82414	0.927533		7.82414	0.932557		7.82414	0.949036		7.82414	0.920297		7.82414	0.943055
7.89865	0.958132		7.89865	0.948931		7.89865	0.957375		7.89865	0.970326		7.89865	0.980778		7.89865	0.934577		7.89865	0.984291		7.89865	0.954939		7.89865	0.959043		7.89865	0.946199		7.89865	0.992385		7.89865	0.929233		7.89865	0.933542		7.89865	0.949956		7.89865	0.921476		7.89865	0.944719
7.97317	0.959686		7.97317	0.949657		7.97317	0.959789		7.97317	0.972774		7.97317	0.981717		7.97317	0.93467		7.97317	0.984425		7.97317	0.95612		7.97317	0.959576		7.97317	0.946879		7.97317	0.992495		7.97317	0.930841		7.97317	0.933378		7.97317	0.950782		7.97317	0.92247		7.97317	0.94537
8.04768	0.961418		8.04768	0.950566		8.04768	0.960271		8.04768	0.972893		8.04768	0.983063		8.04768	0.935392		8.04768	0.986499		8.04768	0.95732		8.04768	0.960474		8.04768	0.94954		8.04768	0.993799		8.04768	0.931537		8.04768	0.936129		8.04768	0.952455		8.04768	0.922325		8.04768	0.946287
8.1222	0.963334		8.1222	0.951502		8.1222	0.96212		8.1222	0.974416		8.1222	0.983867		8.1222	0.935678		8.1222	0.986685		8.1222	0.9576		8.1222	0.962062		8.1222	0.950553		8.1222	0.99529		8.1222	0.931758		8.1222	0.934588		8.1222	0.952999		8.1222	0.924209		8.1222	0.94688
8.19672	0.962779		8.19672	0.952603		8.19672	0.962533		8.19672	0.975457		8.19672	0.985287		8.19672	0.936464		8.19672	0.988545		8.19672	0.956771		8.19672	0.963591		8.19672	0.950532		8.19672	0.996473		8.19672	0.933367		8.19672	0.934728		8.19672	0.954901		8.19672	0.925642		8.19672	0.948212
8.27123	0.9658		8.27123	0.95336		8.27123	0.965746		8.27123	0.976944		8.27123	0.987476		8.27123	0.937325		8.27123	0.989657		8.27123	0.959223		8.27123	0.965007		8.27123	0.952702		8.27123	0.998132		8.27123	0.935168		8.27123	0.936457		8.27123	0.95566		8.27123	0.926519		8.27123	0.949763
8.34575	0.966929		8.34575	0.953309		8.34575	0.964657		8.34575	0.977089		8.34575	0.98714		8.34575	0.938884		8.34575	0.99145		8.34575	0.959373		8.34575	0.966426		8.34575	0.952201		8.34575	0.995235		8.34575	0.935953		8.34575	0.936697		8.34575	0.95667		8.34575	0.926448		8.34575	0.950504
8.42026	0.967827		8.42026	0.956343		8.42026	0.96767		8.42026	0.978615		8.42026	0.989379		8.42026	0.938358		8.42026	0.990942		8.42026	0.961183		8.42026	0.967853		8.42026	0.953084		8.42026	0.997343		8.42026	0.938491		8.42026	0.938368		8.42026	0.957518		8.42026	0.92765		8.42026	0.953662
8.49478	0.97038		8.49478	0.957184		8.49478	0.96809		8.49478	0.980004		8.49478	0.991598		8.49478	0.938069		8.49478	0.990661		8.49478	0.960813		8.49478	0.969781		8.49478	0.955092		8.49478	0.998608		8.49478	0.938834		8.49478	0.939279		8.49478	0.958103		8.49478	0.928045		8.49478	0.954502
8.56929	0.971214		8.56929	0.956853		8.56929	0.968803		8.56929	0.980696		8.56929	0.991855		8.56929	0.939359		8.56929	0.992608		8.56929	0.961294		8.56929	0.970818		8.56929	0.955886		8.56929	0.999589		8.56929	0.939658		8.56929	0.939659		8.56929	0.958752		8.56929	0.929947		8.56929	0.954544
8.64381	0.973979		8.64381	0.959327		8.64381	0.970645		8.64381	0.981726		8.64381	0.993922		8.64381	0.939337		8.64381	0.994546		8.64381	0.961518		8.64381	0.972328		8.64381	0.957276		8.64381	1.00111		8.64381	0.941792		8.64381	0.941812		8.64381	0.959135		8.64381	0.931104		8.64381	0.955669
8.71833	0.974694		8.71833	0.959948		8.71833	0.970996		8.71833	0.983916		8.71833	0.995626		8.71833	0.940539		8.71833	0.994447		8.71833	0.962477		8.71833	0.973463		8.71833	0.956902		8.71833	1.00094		8.71833	0.943624		8.71833	0.94107		8.71833	0.96077		8.71833	0.93075		8.71833	0.956559
8.79284	0.975504		8.79284	0.960463		8.79284	0.973465		8.79284	0.984254		8.79284	0.995761		8.79284	0.940515		8.79284	0.996241		8.79284	0.963395		8.79284	0.974586		8.79284	0.958427		8.79284	1.00399		8.79284	0.945049		8.79284	0.941847		8.79284	0.961397		8.79284	0.931955		8.79284	0.957553
8.86736	0.975683		8.86736	0.961719		8.86736	0.975169		8.86736	0.983804		8.86736	0.997769		8.86736	0.941815		8.86736	0.996322		8.86736	0.965706		8.86736	0.977387		8.86736	0.9599		8.86736	1.00513		8.86736	0.946419		8.86736	0.943312		8.86736	0.962136		8.86736	0.933136		8.86736	0.959555
8.94187	0.977468		8.94187	0.9626		8.94187	0.974784		8.94187	0.984913		8.94187	0.99858		8.94187	0.941513		8.94187	0.995507		8.94187	0.965177		8.94187	0.978945		8.94187	0.961342		8.94187	1.00614		8.94187	0.947054		8.94187	0.944862		8.94187	0.963153		8.94187	0.934424		8.94187	0.960683
9.01639	0.979505		9.01639	0.96392		9.01639	0.979321		9.01639	0.986661		9.01639	0.998519		9.01639	0.940144		9.01639	0.998368		9.01639	0.965988		9.01639	0.980746		9.01639	0.962637		9.01639	1.00622		9.01639	0.94915		9.01639	0.946195		9.01639	0.964783		9.01639	0.935596		9.01639	0.9616
9.0909	0.98156		9.0909	0.965891		9.0909	0.978406		9.0909	0.986513		9.0909	1.00203		9.0909	0.943413		9.0909	0.999198		9.0909	0.96699		9.0909	0.983031		9.0909	0.963763		9.0909	1.00805		9.0909	0.949734		9.0909	0.946697		9.0909	0.96608		9.0909	0.93737		9.0909	0.963934
9.16542	0.985295		9.16542	0.96656		9.16542	0.980323		9.16542	0.989239		9.16542	1.00249		9.16542	0.944203		9.16542	0.999595		9.16542	0.967821		9.16542	0.983061		9.16542	0.964412		9.16542	1.00805		9.16542	0.95241		9.16542	0.947229		9.16542	0.966187		9.16542	0.937917		9.16542	0.965472
9.23993	0.98379		9.23993	0.968052		9.23993	0.98282		9.23993	0.9895		9.23993	1.0046		9.23993	0.944948		9.23993	1.00047		9.23993	0.968452		9.23993	0.984012		9.23993	0.965109		9.23993	1.01002		9.23993	0.952016		9.23993	0.947165		9.23993	0.967096		9.23993	0.939764		9.23993	0.966098
9.31445	0.986767		9.31445	0.969011		9.31445	0.983546		9.31445	0.992173		9.31445	1.00567		9.31445	0.945932		9.31445	1.0022		9.31445	0.969854		9.31445	0.986943		9.31445	0.966682		9.31445	1.01187		9.31445	0.954125		9.31445	0.948326		9.31445	0.968812		9.31445	0.94035		9.31445	0.967834
9.38897	0.989325		9.38897	0.969906		9.38897	0.985089		9.38897	0.992285		9.38897	1.00629		9.38897	0.945749		9.38897	1.00234		9.38897	0.97002		9.38897	0.988306		9.38897	0.968227		9.38897	1.01304		9.38897	0.95537		9.38897	0.949831		9.38897	0.970149		9.38897	0.940617		9.38897	0.969132
9.46348	0.989841		9.46348	0.97224		9.46348	0.985082		9.46348	0.993413		9.46348	1.00715		9.46348	0.94705		9.46348	1.00417		9.46348	0.970561		9.46348	0.990302		9.46348	0.968883		9.46348	1.01366		9.46348	0.95707		9.46348	0.950539		9.46348	0.971956		9.46348	0.942228		9.46348	0.971628
9.538	0.991395		9.538	0.972283		9.538	0.990508		9.538	0.993812		9.538	1.00912		9.538	0.945607		9.538	1.00682		9.538	0.972477		9.538	0.991347		9.538	0.970071		9.538	1.01515		9.538	0.957763		9.538	0.951254		9.538	0.973366		9.538	0.944729		9.538	0.973301
9.61251	0.99182		9.61251	0.973652		9.61251	0.99204		9.61251	0.995262		9.61251	1.01032		9.61251	0.948154		9.61251	1.00699		9.61251	0.971868		9.61251	0.993647		9.61251	0.969319		9.61251	1.01714		9.61251	0.958856		9.61251	0.952422		9.61251	0.973418		9.61251	0.945452		9.61251	0.975344
9.68703	0.993673		9.68703	0.97542		9.68703	0.991716		9.68703	0.995737		9.68703	1.01132		9.68703	0.946867		9.68703	1.00781		9.68703	0.97275		9.68703	0.994261		9.68703	0.972667		9.68703	1.01719		9.68703	0.959582		9.68703	0.952952		9.68703	0.975505		9.68703	0.946559		9.68703	0.978993
9.76154	0.995318		9.76154	0.977837		9.76154	0.993128		9.76154	0.99648		9.76154	1.01273		9.76154	0.948056		9.76154	1.00994		9.76154	0.97427		9.76154	0.996392		9.76154	0.972849		9.76154	1.01818		9.76154	0.961064		9.76154	0.95435		9.76154	0.976764		9.76154	0.945413		9.76154	0.978672
9.83606	0.996278		9.83606	0.978444		9.83606	0.992119		9.83606	0.999921		9.83606	1.01298		9.83606	0.948503		9.83606	1.01164		9.83606	0.974524		9.83606	0.998853		9.83606	0.974446		9.83606	1.0204		9.83606	0.962431		9.83606	0.954791		9.83606	0.978181		9.83606	0.948229		9.83606	0.980775
9.91057	0.998348		9.91057	0.979948		9.91057	0.994137		9.91057	1.00048		9.91057	1.01549		9.91057	0.946832		9.91057	1.01344		9.91057	0.97587		9.91057	1.00044		9.91057	0.974329		9.91057	1.02031		9.91057	0.965385		9.91057	0.955556		9.91057	0.978089		9.91057	0.9487		9.91057	0.982093
9.98509	0.999656		9.98509	0.98211		9.98509	0.996316		9.98509	1.00071		9.98509	1.01592		9.98509	0.948127		9.98509	1.01375		9.98509	0.976225		9.98509	1.00393		9.98509	0.977718		9.98509	1.02208		9.98509	0.964829		9.98509	0.956631		9.98509	0.979894		9.98509	0.950999		9.98509	0.983296
10.0596	1.00112		10.0596	0.982358		10.0596	0.997146		10.0596	1.00395		10.0596	1.01663		10.0596	0.948596		10.0596	1.01454		10.0596	0.976605		10.0596	1.00473		10.0596	0.978027		10.0596	1.02379		10.0596	0.96585		10.0596	0.958265		10.0596	0.980546		10.0596	0.952842		10.0596	0.985723
10.1341	1.00296		10.1341	0.984149		10.1341	0.997955		10.1341	1.00392		10.1341	1.01771		10.1341	0.948732		10.1341	1.01811		10.1341	0.976898		10.1341	1.00668		10.1341	0.978721		10.1341	1.02496		10.1341	0.968058		10.1341	0.957949		10.1341	0.982017		10.1341	0.953398		10.1341	0.987917
10.2086	1.0042		10.2086	0.984754		10.2086	1.00012		10.2086	1.00498		10.2086	1.02011		10.2086	0.949113		10.2086	1.01854		10.2086	0.97738		10.2086	1.01048		10.2086	0.981011		10.2086	1.02553		10.2086	0.969451		10.2086	0.959549		10.2086	0.983186		10.2086	0.95419		10.2086	0.988914
10.2832	1.00585		10.2832	0.985913		10.2832	1.00133		10.2832	1.00487		10.2832	1.02084		10.2832	0.948895		10.2832	1.01921		10.2832	0.977286		10.2832	1.0134		10.2832	0.98212		10.2832	1.0269		10.2832	0.969606		10.2832	0.959546		10.2832	0.983092		10.2832	0.955985		10.2832	0.990883
10.3577	1.00667		10.3577	0.987341		10.3577	1.00282		10.3577	1.00763		10.3577	1.02228		10.3577	0.947936		10.3577	1.02245		10.3577	0.97853		10.3577	1.01367		10.3577	0.981931		10.3577	1.02776		10.3577	0.969545		10.3577	0.961827		10.3577	0.985363		10.3577	0.958378		10.3577	0.991042
10.4322	1.00716		10.4322	0.988827		10.4322	1.00384		10.4322	1.00897		10.4322	1.02341		10.4322	0.948009		10.4322	1.02441		10.4322	0.980056		10.4322	1.01688		10.4322	0.984308		10.4322	1.02989		10.4322	0.971824		10.4322	0.962932		10.4322	0.986198		10.4322	0.958832		10.4322	0.992763
10.5067	1.00878		10.5067	0.991257		10.5067	1.00411		10.5067	1.01092		10.5067	1.02457		10.5067	0.949026		10.5067	1.02511		10.5067	0.980456		10.5067	1.02092		10.5067	0.984847		10.5067	1.02932		10.5067	0.97238		10.5067	0.963434		10.5067	0.985643		10.5067	0.959804		10.5067	0.994946
10.5812	1.01092		10.5812	0.991023		10.5812	1.00448		10.5812	1.00939		10.5812	1.02642		10.5812	0.94859		10.5812	1.02688		10.5812	0.98139		10.5812	1.02309		10.5812	0.985053		10.5812	1.03165		10.5812	0.973242		10.5812	0.964865		10.5812	0.98736		10.5812	0.962294		10.5812	0.994686
10.6557	1.0105		10.6557	0.992916		10.6557	1.00622		10.6557	1.01085		10.6557	1.02593		10.6557	0.948364		10.6557	1.02838		10.6557	0.981322		10.6557	1.02526		10.6557	0.988459		10.6557	1.03211		10.6557	0.975355		10.6557	0.966467		10.6557	0.988005		10.6557	0.962739		10.6557	0.996097
10.7302	1.01392		10.7302	0.994024		10.7302	1.00805		10.7302	1.0118		10.7302	1.02775		10.7302	0.947159		10.7302	1.02873		10.7302	0.983339		10.7302	1.02688		10.7302	0.987707		10.7302	1.03309		10.7302	0.976417		10.7302	0.967057		10.7302	0.98887		10.7302	0.965358		10.7302	0.996556
10.8048	1.01545		10.8048	0.996344		10.8048	1.00947		10.8048	1.01361		10.8048	1.02926		10.8048	0.948097		10.8048	1.03029		10.8048	0.983433		10.8048	1.02924		10.8048	0.990523		10.8048	1.0333		10.8048	0.97671		10.8048	0.967768		10.8048	0.988935		10.8048	0.964889		10.8048	0.998596
10.8793	1.01489		10.8793	0.996915		10.8793	1.01075		10.8793	1.01443		10.8793	1.03095		10.8793	0.947922		10.8793	1.03131		10.8793	0.983969		10.8793	1.03197		10.8793	0.992044		10.8793	1.03534		10.8793	0.978173		10.8793	0.968341		10.8793	0.991277		10.8793	0.965718		10.8793	0.999897
10.9538	1.01664		10.9538	0.998998		10.9538	1.01015		10.9538	1.01428		10.9538	1.03209		10.9538	0.946221		10.9538	1.03296		10.9538	0.98411		10.9538	1.03313		10.9538	0.9928		10.9538	1.03648		10.9538	0.978437		10.9538	0.968613		10.9538	0.991205		10.9538	0.967565		10.9538	1.00154
11.0283	1.01829		11.0283	0.998651		11.0283	1.01296		11.0283	1.01841		11.0283	1.03276		11.0283	0.948459		11.0283	1.03417		11.0283	0.98616		11.0283	1.0352		11.0283	0.993456		11.0283	1.03658		11.0283	0.97923		11.0283	0.970198		11.0283	0.993178		11.0283	0.968686		11.0283	1.00311
11.1028	1.0204		11.1028	1.00097		11.1028	1.01351		11.1028	1.01858		11.1028	1.03311		11.1028	0.947371		11.1028	1.03594		11.1028	0.985043		11.1028	1.03505		11.1028	0.995681		11.1028	1.03769		11.1028	0.981138		11.1028	0.972072		11.1028	0.993758		11.1028	0.969183		11.1028	1.00449
11.1773	1.02138		11.1773	1.00215		11.1773	1.01475		11.1773	1.02017		11.1773	1.03624		11.1773	0.947464		11.1773	1.03727		11.1773	0.986128		11.1773	1.03682		11.1773	0.995519		11.1773	1.04033		11.1773	0.98124		11.1773	0.973126		11.1773	0.993389		11.1773	0.969693		11.1773	1.00497
11.2519	1.02363		11.2519	1.00201		11.2519	1.01618		11.2519	1.02121		11.2519	1.03743		11.2519	0.946965		11.2519	1.03847		11.2519	0.988181		11.2519	1.03772		11.2519	0.9977		11.2519	1.03978		11.2519	0.982121		11.2519	0.974387		11.2519	0.995187		11.2519	0.972207		11.2519	1.00594
11.3264	1.02543		11.3264	1.00498		11.3264	1.01687		11.3264	1.02224		11.3264	1.03848		11.3264	0.9476		11.3264	1.03955		11.3264	0.989207		11.3264	1.04039		11.3264	0.999664		11.3264	1.04073		11.3264	0.982762		11.3264	0.97424		11.3264	0.995745		11.3264	0.97298		11.3264	1.00754
11.4009	1.02673		11.4009	1.00647		11.4009	1.0179		11.4009	1.02349		11.4009	1.04049		11.4009	0.947262		11.4009	1.04138		11.4009	0.990783		11.4009	1.04034		11.4009	0.999558		11.4009	1.04302		11.4009	0.985021		11.4009	0.97655		11.4009	0.99716		11.4009	0.974124		11.4009	1.00865
11.4754	1.02986		11.4754	1.00681		11.4754	1.01896		11.4754	1.02618		11.4754	1.04044		11.4754	0.946728		11.4754	1.04318		11.4754	0.98993		11.4754	1.04237		11.4754	1.0018		11.4754	1.04183		11.4754	0.983651		11.4754	0.977866		11.4754	0.998143		11.4754	0.975248		11.4754	1.00932
11.5499	1.03106		11.5499	1.0085		11.5499	1.01944		11.5499	1.02629		11.5499	1.04248		11.5499	0.947764		11.5499	1.04487		11.5499	0.991985		11.5499	1.04328		11.5499	1.00171		11.5499	1.04345		11.5499	0.986479		11.5499	0.978993		11.5499	0.999314		11.5499	0.977953		11.5499	1.01137
11.6244	1.03519		11.6244	1.01018		11.6244	1.0211		11.6244	1.02701		11.6244	1.04437		11.6244	0.947241		11.6244	1.04555		11.6244	0.991554		11.6244	1.04568		11.6244	1.00515		11.6244	1.04412		11.6244	0.985874		11.6244	0.979659		11.6244	0.999012		11.6244	0.977072		11.6244	1.01293
11.6989	1.03554		11.6989	1.01108		11.6989	1.02125		11.6989	1.0279		11.6989	1.04628		11.6989	0.945586		11.6989	1.04724		11.6989	0.993333		11.6989	1.04588		11.6989	1.00523		11.6989	1.04765		11.6989	0.987434		11.6989	0.981714		11.6989	0.99944		11.6989	0.978487		11.6989	1.01511
11.7735	1.03676		11.7735	1.01159		11.7735	1.02395		11.7735	1.02989		11.7735	1.04675		11.7735	0.946262		11.7735	1.04712		11.7735	0.994252		11.7735	1.04838		11.7735	1.00584		11.7735	1.04906		11.7735	0.987681		11.7735	0.982476		11.7735	1.00135		11.7735	0.979658		11.7735	1.01522
11.848	1.03904		11.848	1.01323		11.848	1.02466		11.848	1.03246		11.848	1.04912		11.848	0.945905		11.848	1.04848		11.848	0.996359		11.848	1.04999		11.848	1.00679		11.848	1.04947		11.848	0.987061		11.848	0.983657		11.848	1.00264		11.848	0.980005		11.848	1.01626
11.9225	1.04191		11.9225	1.0142		11.9225	1.02402		11.9225	1.03372		11.9225	1.05042		11.9225	0.944059		11.9225	1.05141		11.9225	0.997338		11.9225	1.05139		11.9225	1.00948		11.9225	1.05104		11.9225	0.98735		11.9225	0.985815		11.9225	1.00321		11.9225	0.980014		11.9225	1.01815
11.997	1.04234		11.997	1.01521		11.997	1.02586		11.997	1.03431		11.997	1.05249		11.997	0.943895		11.997	1.05081		11.997	0.997004		11.997	1.05186		11.997	1.01104		11.997	1.05042		11.997	0.988156		11.997	0.98475		11.997	1.00441		11.997	0.978353		11.997	1.01931
12.0715	1.04403		12.0715	1.01685		12.0715	1.02651		12.0715	1.0361		12.0715	1.05293		12.0715	0.944187		12.0715	1.05192		12.0715	0.99892		12.0715	1.05488		12.0715	1.01071		12.0715	1.05233		12.0715	0.988298		12.0715	0.988907		12.0715	1.00445		12.0715	0.977534		12.0715	1.01935
12.146	1.04633		12.146	1.01751		12.146	1.02618		12.146	1.0358		12.146	1.05517		12.146	0.944296		12.146	1.05315		12.146	0.998303		12.146	1.0561		12.146	1.01288		12.146	1.0524		12.146	0.989962		12.146	0.988733		12.146	1.00661		12.146	0.976742		12.146	1.02083
12.2206	1.0482		12.2206	1.02052		12.2206	1.02893		12.2206	1.03833		12.2206	1.05531		12.2206	0.944127		12.2206	1.05498		12.2206	0.999842		12.2206	1.05783		12.2206	1.01426		12.2206	1.05582		12.2206	0.99062		12.2206	0.990857		12.2206	1.00613		12.2206	0.977751		12.2206	1.02289
12.2951	1.05128		12.2951	1.02186		12.2951	1.03061		12.2951	1.0395		12.2951	1.05654		12.2951	0.94476		12.2951	1.05503		12.2951	1.00203		12.2951	1.05746		12.2951	1.01382		12.2951	1.0562		12.2951	0.989497		12.2951	0.992133		12.2951	1.00729		12.2951	0.977456		12.2951	1.02341
12.3696	1.05367		12.3696	1.02184		12.3696	1.0301		12.3696	1.04116		12.3696	1.05775		12.3696	0.946014		12.3696	1.05772		12.3696	1.00284		12.3696	1.05927		12.3696	1.016		12.3696	1.05678		12.3696	0.991017		12.3696	0.993638		12.3696	1.00833		12.3696	0.978993		12.3696	1.02439
12.4441	1.05529		12.4441	1.02252		12.4441	1.0325		12.4441	1.04188		12.4441	1.05822		12.4441	0.945888		12.4441	1.05863		12.4441	1.00394		12.4441	1.06128		12.4441	1.01932		12.4441	1.05635		12.4441	0.990857		12.4441	0.995752		12.4441	1.00929		12.4441	0.978848		12.4441	1.02452
12.5186	1.05743		12.5186	1.02605		12.5186	1.03317		12.5186	1.04294		12.5186	1.05981		12.5186	0.945853		12.5186	1.06001		12.5186	1.00486		12.5186	1.06327		12.5186	1.01881		12.5186	1.05819		12.5186	0.992988		12.5186	0.994833		12.5186	1.00947		12.5186	0.979562		12.5186	1.02579
12.5931	1.06035		12.5931	1.02689		12.5931	1.03594		12.5931	1.04302		12.5931	1.06214		12.5931	0.945455		12.5931	1.06067		12.5931	1.00659		12.5931	1.06426		12.5931	1.02065		12.5931	1.05774		12.5931	0.992927		12.5931	0.996073		12.5931	1.01113		12.5931	0.981709		12.5931	1.02557
12.6677	1.06346		12.6677	1.02705		12.6677	1.03501		12.6677	1.0461		12.6677	1.06221		12.6677	0.947579		12.6677	1.0616		12.6677	1.00808		12.6677	1.06401		12.6677	1.02212		12.6677	1.05814		12.6677	0.993524		12.6677	0.998517		12.6677	1.01107		12.6677	0.981594		12.6677	1.02768
12.7422	1.06333		12.7422	1.02903		12.7422	1.03744		12.7422	1.04658		12.7422	1.0636		12.7422	0.947854		12.7422	1.06343		12.7422	1.00919		12.7422	1.06614		12.7422	1.02541		12.7422	1.05819		12.7422	0.994025		12.7422	0.998958		12.7422	1.01174		12.7422	0.98104		12.7422	1.02809
12.8167	1.06549		12.8167	1.02871		12.8167	1.03778		12.8167	1.04744		12.8167	1.0652		12.8167	0.949165		12.8167	1.06381		12.8167	1.0098		12.8167	1.06704		12.8167	1.02591		12.8167	1.05974		12.8167	0.996111		12.8167	0.999534		12.8167	1.01331		12.8167	0.98228		12.8167	1.03002
12.8912	1.06877		12.8912	1.03047		12.8912	1.03917		12.8912	1.04832		12.8912	1.06662		12.8912	0.949991		12.8912	1.06565		12.8912	1.01067		12.8912	1.06774		12.8912	1.02619		12.8912	1.05995		12.8912	0.997445		12.8912	1.00031		12.8912	1.01291		12.8912	0.982245		12.8912	1.02941
12.9657	1.07074		12.9657	1.03021		12.9657	1.03945		12.9657	1.04989		12.9657	1.0687		12.9657	0.951605		12.9657	1.06644		12.9657	1.01263		12.9657	1.0689		12.9657	1.02942		12.9657	1.06124		12.9657	0.997384		12.9657	1.00189		12.9657	1.01279		12.9657	0.982528		12.9657	1.03119
13.0402	1.0725		13.0402	1.03147		13.0402	1.04075		13.0402	1.0504		13.0402	1.07107		13.0402	0.95269		13.0402	1.06925		13.0402	1.01406		13.0402	1.0697		13.0402	1.02912		13.0402	1.06247		13.0402	0.998403		13.0402	1.00425		13.0402	1.01459		13.0402	0.982881		13.0402	1.03207
13.1147	1.07332		13.1147	1.03286		13.1147	1.04141		13.1147	1.05193		13.1147	1.07301		13.1147	0.953023		13.1147	1.06899		13.1147	1.01539		13.1147	1.07247		13.1147	1.03108		13.1147	1.0637		13.1147	0.998606		13.1147	1.00576		13.1147	1.01606		13.1147	0.983059		13.1147	1.0326
13.1893	1.07632		13.1893	1.03322		13.1893	1.0426		13.1893	1.0536		13.1893	1.07261		13.1893	0.955196		13.1893	1.07053		13.1893	1.01652		13.1893	1.0725		13.1893	1.03232		13.1893	1.06597		13.1893	0.999866		13.1893	1.0057		13.1893	1.01637		13.1893	0.98289		13.1893	1.03256
13.2638	1.07732		13.2638	1.03461		13.2638	1.04288		13.2638	1.05435		13.2638	1.07504		13.2638	0.957006		13.2638	1.07173		13.2638	1.018		13.2638	1.07377		13.2638	1.03356		13.2638	1.06542		13.2638	0.999716		13.2638	1.00734		13.2638	1.0178		13.2638	0.983424		13.2638	1.03336
13.3383	1.07775		13.3383	1.03516		13.3383	1.04549		13.3383	1.05619		13.3383	1.07574		13.3383	0.956614		13.3383	1.07382		13.3383	1.02019		13.3383	1.07387		13.3383	1.03459		13.3383	1.06735		13.3383	1.00028		13.3383	1.00883		13.3383	1.01762		13.3383	0.985241		13.3383	1.03356
13.4128	1.0818		13.4128	1.03624		13.4128	1.04574		13.4128	1.05839		13.4128	1.07871		13.4128	0.958217		13.4128	1.07451		13.4128	1.02076		13.4128	1.07606		13.4128	1.03627		13.4128	1.06918		13.4128	1.00157		13.4128	1.01044		13.4128	1.01946		13.4128	0.985932		13.4128	1.03391
13.4873	1.08239		13.4873	1.03739		13.4873	1.04656		13.4873	1.05974		13.4873	1.07821		13.4873	0.961308		13.4873	1.07579		13.4873	1.02188		13.4873	1.07633		13.4873	1.03716		13.4873	1.06771		13.4873	1.00323		13.4873	1.0103		13.4873	1.02		13.4873	0.986754		13.4873	1.03519
13.5618	1.08289		13.5618	1.03941		13.5618	1.04725		13.5618	1.06033		13.5618	1.08029		13.5618	0.960749		13.5618	1.07757		13.5618	1.02469		13.5618	1.07846		13.5618	1.03965		13.5618	1.06953		13.5618	1.00415		13.5618	1.01174		13.5618	1.02039		13.5618	0.987525		13.5618	1.03709
13.6364	1.08493		13.6364	1.03965		13.6364	1.04897		13.6364	1.06113		13.6364	1.08011		13.6364	0.963394		13.6364	1.07831		13.6364	1.02612		13.6364	1.07949		13.6364	1.0411		13.6364	1.07022		13.6364	1.00448		13.6364	1.01289		13.6364	1.02155		13.6364	0.989119		13.6364	1.03675
13.7109	1.0853		13.7109	1.04074		13.7109	1.0497		13.7109	1.06366		13.7109	1.08104		13.7109	0.965398		13.7109	1.0791		13.7109	1.02656		13.7109	1.08006		13.7109	1.04256		13.7109	1.07021		13.7109	1.00512		13.7109	1.01411		13.7109	1.02165		13.7109	0.99036		13.7109	1.03684
13.7854	1.08838		13.7854	1.04059		13.7854	1.05221		13.7854	1.06387		13.7854	1.08288		13.7854	0.966813		13.7854	1.08069		13.7854	1.02792		13.7854	1.0804		13.7854	1.0453		13.7854	1.06985		13.7854	1.00702		13.7854	1.01611		13.7854	1.02316		13.7854	0.989425		13.7854	1.03674
13.8599	1.08954		13.8599	1.04105		13.8599	1.05292		13.8599	1.06711		13.8599	1.08412		13.8599	0.968113		13.8599	1.08103		13.8599	1.03079		13.8599	1.08138		13.8599	1.04622		13.8599	1.06868		13.8599	1.00828		13.8599	1.01589		13.8599	1.02369		13.8599	0.991075		13.8599	1.03947
13.9344	1.09137		13.9344	1.04206		13.9344	1.0528		13.9344	1.06698		13.9344	1.08476		13.9344	0.969983		13.9344	1.08288		13.9344	1.03136		13.9344	1.08112		13.9344	1.04715		13.9344	1.06976		13.9344	1.00814		13.9344	1.01675		13.9344	1.02549		13.9344	0.992664		13.9344	1.03926
14.0089	1.09142		14.0089	1.04316		14.0089	1.0552		14.0089	1.06763		14.0089	1.08609		14.0089	0.972475		14.0089	1.08438		14.0089	1.03335		14.0089	1.08216		14.0089	1.05087		14.0089	1.06905		14.0089	1.00997		14.0089	1.02002		14.0089	1.02577		14.0089	0.992106		14.0089	1.04017
14.0834	1.09295		14.0834	1.04383		14.0834	1.05575		14.0834	1.06961		14.0834	1.08623		14.0834	0.973896		14.0834	1.08522		14.0834	1.03407		14.0834	1.08449		14.0834	1.05071		14.0834	1.06908		14.0834	1.01069		14.0834	1.02047		14.0834	1.02738		14.0834	0.992963		14.0834	1.04074
14.158	1.09498		14.158	1.04435		14.158	1.05582		14.158	1.07153		14.158	1.08683		14.158	0.97362		14.158	1.08719		14.158	1.03521		14.158	1.08327		14.158	1.05363		14.158	1.06758		14.158	1.01212		14.158	1.02217		14.158	1.02852		14.158	0.99401		14.158	1.0405
14.2325	1.09543		14.2325	1.04507		14.2325	1.05741		14.2325	1.07267		14.2325	1.08768		14.2325	0.97545		14.2325	1.08564		14.2325	1.03751		14.2325	1.08482		14.2325	1.05268		14.2325	1.06712		14.2325	1.01253		14.2325	1.02112		14.2325	1.029		14.2325	0.99404		14.2325	1.04134
14.307	1.09568		14.307	1.04696		14.307	1.05814		14.307	1.07318		14.307	1.08787		14.307	0.977445		14.307	1.08699		14.307	1.03857		14.307	1.08599		14.307	1.05565		14.307	1.06534		14.307	1.01349		14.307	1.02273		14.307	1.03037		14.307	0.99533		14.307	1.04121
14.3815	1.09829		14.3815	1.04632		14.3815	1.05698		14.3815	1.07494		14.3815	1.08887		14.3815	0.977633		14.3815	1.08819		14.3815	1.03977		14.3815	1.0873		14.3815	1.05678		14.3815	1.06495		14.3815	1.01471		14.3815	1.02418		14.3815	1.0308		14.3815	0.995773		14.3815	1.04148
14.456	1.09876		14.456	1.04637		14.456	1.05994		14.456	1.07777		14.456	1.08933		14.456	0.979768		14.456	1.08775		14.456	1.04179		14.456	1.08883		14.456	1.05829		14.456	1.06609		14.456	1.01514		14.456	1.02575		14.456	1.03094		14.456	0.997125		14.456	1.04321
14.5305	1.10049		14.5305	1.04782		14.5305	1.06146		14.5305	1.0785		14.5305	1.09048		14.5305	0.981314		14.5305	1.09013		14.5305	1.04344		14.5305	1.08981		14.5305	1.05922		14.5305	1.06444		14.5305	1.01731		14.5305	1.02491		14.5305	1.03219		14.5305	0.998024		14.5305	1.0426
14.6051	1.1013		14.6051	1.04734		14.6051	1.06218		14.6051	1.08061		14.6051	1.09031		14.6051	0.981772		14.6051	1.09018		14.6051	1.04576		14.6051	1.09057		14.6051	1.06034		14.6051	1.06459		14.6051	1.01759		14.6051	1.027		14.6051	1.03398		14.6051	0.998211		14.6051	1.04487
14.6796	1.10404		14.6796	1.04973		14.6796	1.0616		14.6796	1.08077		14.6796	1.09143		14.6796	0.984024		14.6796	1.09143		14.6796	1.0465		14.6796	1.0913		14.6796	1.06074		14.6796	1.06411		14.6796	1.01981		14.6796	1.02771		14.6796	1.03568		14.6796	0.999207		14.6796	1.04454
14.7541	1.10291		14.7541	1.04836		14.7541	1.06383		14.7541	1.08359		14.7541	1.09044		14.7541	0.985875		14.7541	1.09339		14.7541	1.04771		14.7541	1.09212		14.7541	1.06222		14.7541	1.06174		14.7541	1.0195		14.7541	1.0296		14.7541	1.03496		14.7541	0.999669		14.7541	1.04612
14.8286	1.10509		14.8286	1.04941		14.8286	1.06567		14.8286	1.08515		14.8286	1.09046		14.8286	0.988296		14.8286	1.09341		14.8286	1.04882		14.8286	1.09272		14.8286	1.06278		14.8286	1.06306		14.8286	1.02168		14.8286	1.03064		14.8286	1.03647		14.8286	0.999709		14.8286	1.04692
14.9031	1.10593		14.9031	1.05007		14.9031	1.06711		14.9031	1.08728		14.9031	1.091		14.9031	0.989806		14.9031	1.09253		14.9031	1.05077		14.9031	1.09322		14.9031	1.06526		14.9031	1.06345		14.9031	1.02213		14.9031	1.03221		14.9031	1.03889		14.9031	0.999984		14.9031	1.04713
14.9776	1.10496		14.9776	1.05013		14.9776	1.06735		14.9776	1.0908		14.9776	1.09099		14.9776	0.991227		14.9776	1.09566		14.9776	1.05105		14.9776	1.0951		14.9776	1.06493		14.9776	1.0637		14.9776	1.0225		14.9776	1.03184		14.9776	1.03953		14.9776	1.00202		14.9776	1.04817
15.0522	1.10657		15.0522	1.05099		15.0522	1.07015		15.0522	1.09266		15.0522	1.0918		15.0522	0.992783		15.0522	1.09801		15.0522	1.05237		15.0522	1.09653		15.0522	1.06666		15.0522	1.06484		15.0522	1.02424		15.0522	1.03371		15.0522	1.04144		15.0522	1.00033		15.0522	1.04735
15.1267	1.10713		15.1267	1.05178		15.1267	1.07073		15.1267	1.09245		15.1267	1.09207		15.1267	0.994561		15.1267	1.09737		15.1267	1.05386		15.1267	1.09635		15.1267	1.0678		15.1267	1.06546		15.1267	1.02368		15.1267	1.03413		15.1267	1.04116		15.1267	1.00273		15.1267	1.04843
15.2012	1.10856		15.2012	1.05211		15.2012	1.06995		15.2012	1.09504		15.2012	1.09251		15.2012	0.996148		15.2012	1.09925		15.2012	1.05508		15.2012	1.09698		15.2012	1.0699		15.2012	1.06435		15.2012	1.02585		15.2012	1.03541		15.2012	1.0427		15.2012	1.00242		15.2012	1.04964
15.2757	1.1094		15.2757	1.05416		15.2757	1.07126		15.2757	1.09338		15.2757	1.09095		15.2757	0.997527		15.2757	1.09917		15.2757	1.05578		15.2757	1.09944		15.2757	1.07086		15.2757	1.0635		15.2757	1.02669		15.2757	1.03803		15.2757	1.04368		15.2757	1.00413		15.2757	1.05044
15.3502	1.11		15.3502	1.05357		15.3502	1.07288		15.3502	1.09724		15.3502	1.09151		15.3502	0.999918		15.3502	1.09925		15.3502	1.05704		15.3502	1.09931		15.3502	1.07184		15.3502	1.0647		15.3502	1.02804		15.3502	1.03729		15.3502	1.04484		15.3502	1.00323		15.3502	1.05008
15.4247	1.11073		15.4247	1.05331		15.4247	1.07522		15.4247	1.09855		15.4247	1.0918		15.4247	0.999525		15.4247	1.10125		15.4247	1.05903		15.4247	1.10107		15.4247	1.07361		15.4247	1.06527		15.4247	1.02828		15.4247	1.03978		15.4247	1.04594		15.4247	1.00381		15.4247	1.05159
15.4992	1.11171		15.4992	1.0549		15.4992	1.0747		15.4992	1.10043		15.4992	1.09142		15.4992	1.00204		15.4992	1.10259		15.4992	1.06019		15.4992	1.10127		15.4992	1.07519		15.4992	1.06636		15.4992	1.02984		15.4992	1.03946		15.4992	1.04698		15.4992	1.00434		15.4992	1.05227
15.5738	1.11122		15.5738	1.05458		15.5738	1.07672		15.5738	1.10305		15.5738	1.09272		15.5738	1.00373		15.5738	1.10414		15.5738	1.06137		15.5738	1.10241		15.5738	1.07552		15.5738	1.06718		15.5738	1.03016		15.5738	1.0408		15.5738	1.04823		15.5738	1.00457		15.5738	1.05311
15.6483	1.11242		15.6483	1.05506		15.6483	1.07802		15.6483	1.10326		15.6483	1.09237		15.6483	1.00573		15.6483	1.10422		15.6483	1.06244		15.6483	1.10318		15.6483	1.07655		15.6483	1.06707		15.6483	1.03237		15.6483	1.04304		15.6483	1.04879		15.6483	1.00626		15.6483	1.05117
15.7228	1.11462		15.7228	1.0566		15.7228	1.07851		15.7228	1.10618		15.7228	1.09301		15.7228	1.00746		15.7228	1.10546		15.7228	1.06335		15.7228	1.1056		15.7228	1.07795		15.7228	1.0679		15.7228	1.03159		15.7228	1.04375		15.7228	1.05051		15.7228	1.00574		15.7228	1.05367
15.7973	1.11634		15.7973	1.05648		15.7973	1.08014		15.7973	1.10674		15.7973	1.09294		15.7973	1.00987		15.7973	1.10526		15.7973	1.06464		15.7973	1.10734		15.7973	1.08073		15.7973	1.06811		15.7973	1.03334		15.7973	1.04418		15.7973	1.05222		15.7973	1.0058		15.7973	1.05477
15.8718	1.11577		15.8718	1.05797		15.8718	1.08117		15.8718	1.10919		15.8718	1.09265		15.8718	1.01146		15.8718	1.1066		15.8718	1.06637		15.8718	1.10777		15.8718	1.08		15.8718	1.06975		15.8718	1.03459		15.8718	1.046		15.8718	1.05191		15.8718	1.0074		15.8718	1.05625
15.9463	1.11766		15.9463	1.05715		15.9463	1.08156		15.9463	1.11228		15.9463	1.09254		15.9463	1.01358		15.9463	1.10639		15.9463	1.06672		15.9463	1.10778		15.9463	1.08098		15.9463	1.06965		15.9463	1.0355		15.9463	1.0476		15.9463	1.05385		15.9463	1.00692		15.9463	1.05646
16.0209	1.11858		16.0209	1.05876		16.0209	1.08362		16.0209	1.11269		16.0209	1.09343		16.0209	1.01685		16.0209	1.10623		16.0209	1.06863		16.0209	1.11001		16.0209	1.08273		16.0209	1.06931		16.0209	1.03696		16.0209	1.04899		16.0209	1.05436		16.0209	1.00766		16.0209	1.05649
16.0954	1.11856		16.0954	1.05824		16.0954	1.08336		16.0954	1.11412		16.0954	1.09311		16.0954	1.01873		16.0954	1.10799		16.0954	1.06889		16.0954	1.11071		16.0954	1.08313		16.0954	1.07087		16.0954	1.03807		16.0954	1.05086		16.0954	1.05533		16.0954	1.0087		16.0954	1.05757
16.1699	1.12011		16.1699	1.05897		16.1699	1.08432		16.1699	1.11547		16.1699	1.09377		16.1699	1.01946		16.1699	1.10792		16.1699	1.06902		16.1699	1.11257		16.1699	1.08465		16.1699	1.07134		16.1699	1.03817		16.1699	1.05035		16.1699	1.05665		16.1699	1.00824		16.1699	1.05832
16.2444	1.12124		16.2444	1.05747		16.2444	1.0846		16.2444	1.11755		16.2444	1.09323		16.2444	1.0216		16.2444	1.10753		16.2444	1.06994		16.2444	1.11321		16.2444	1.0847		16.2444	1.07127		16.2444	1.03863		16.2444	1.0524		16.2444	1.05731		16.2444	1.0081		16.2444	1.05865
16.3189	1.12229		16.3189	1.05853		16.3189	1.08631		16.3189	1.11829		16.3189	1.09341		16.3189	1.02398		16.3189	1.10839		16.3189	1.07096		16.3189	1.11428		16.3189	1.08419		16.3189	1.07249		16.3189	1.04146		16.3189	1.05273		16.3189	1.05896		16.3189	1.00933		16.3189	1.05969
16.3934	1.12114		16.3934	1.0577		16.3934	1.08794		16.3934	1.12059		16.3934	1.09518		16.3934	1.02558		16.3934	1.10924		16.3934	1.07319		16.3934	1.11751		16.3934	1.08406		16.3934	1.07268		16.3934	1.04184		16.3934	1.05362		16.3934	1.05963		16.3934	1.00879		16.3934	1.05868
16.4679	1.12479		16.4679	1.05797		16.4679	1.08779		16.4679	1.12115		16.4679	1.09571		16.4679	1.02616		16.4679	1.10972		16.4679	1.07361		16.4679	1.11779		16.4679	1.0842		16.4679	1.07495		16.4679	1.04264		16.4679	1.05534		16.4679	1.06125		16.4679	1.00994		16.4679	1.05982
16.5425	1.12531		16.5425	1.05806		16.5425	1.09129		16.5425	1.12446		16.5425	1.09543		16.5425	1.02847		16.5425	1.1116		16.5425	1.07614		16.5425	1.11834		16.5425	1.08527		16.5425	1.07294		16.5425	1.04248		16.5425	1.05542		16.5425	1.06199		16.5425	1.01047		16.5425	1.05949
16.617	1.12485		16.617	1.05763		16.617	1.09128		16.617	1.12658		16.617	1.09699		16.617	1.03001		16.617	1.11222		16.617	1.07606		16.617	1.11992		16.617	1.08511		16.617	1.07651		16.617	1.04504		16.617	1.05674		16.617	1.06278		16.617	1.0113		16.617	1.06019
16.6915	1.12613		16.6915	1.05777		16.6915	1.09182		16.6915	1.1287		16.6915	1.09695		16.6915	1.03079		16.6915	1.11166		16.6915	1.07628		16.6915	1.12141		16.6915	1.08593		16.6915	1.07649		16.6915	1.04453		16.6915	1.05808		16.6915	1.06302		16.6915	1.01145		16.6915	1.06195
16.766	1.1275		16.766	1.05783		16.766	1.09335		16.766	1.13046		16.766	1.09726		16.766	1.03338		16.766	1.11303		16.766	1.07881		16.766	1.12305		16.766	1.08628		16.766	1.07699		16.766	1.04619		16.766	1.05743		16.766	1.06486		16.766	1.01097		16.766	1.06199
16.8405	1.12938		16.8405	1.05805		16.8405	1.09461		16.8405	1.13183		16.8405	1.09789		16.8405	1.03534		16.8405	1.11451		16.8405	1.08034		16.8405	1.12451		16.8405	1.08732		16.8405	1.07736		16.8405	1.04646		16.8405	1.05936		16.8405	1.06555		16.8405	1.01175		16.8405	1.06099
16.915	1.12912		16.915	1.05833		16.915	1.09404		16.915	1.13392		16.915	1.09779		16.915	1.03555		16.915	1.11375		16.915	1.08125		16.915	1.12569		16.915	1.08825		16.915	1.07786		16.915	1.04902		16.915	1.05931		16.915	1.06622		16.915	1.01307		16.915	1.06249
16.9896	1.13112		16.9896	1.05866		16.9896	1.09441		16.9896	1.1367		16.9896	1.09787		16.9896	1.03779		16.9896	1.11426		16.9896	1.08246		16.9896	1.12827		16.9896	1.08966		16.9896	1.07853		16.9896	1.04837		16.9896	1.06151		16.9896	1.06707		16.9896	1.01304		16.9896	1.06148
17.0641	1.13348		17.0641	1.0578		17.0641	1.09495		17.0641	1.13676		17.0641	1.09786		17.0641	1.039		17.0641	1.11567		17.0641	1.08397		17.0641	1.12969		17.0641	1.08912		17.0641	1.07956		17.0641	1.04914		17.0641	1.06218		17.0641	1.06871		17.0641	1.01422		17.0641	1.0626
17.1386	1.13085		17.1386	1.05816		17.1386	1.09463		17.1386	1.14117		17.1386	1.09977		17.1386	1.04175		17.1386	1.1146		17.1386	1.08488		17.1386	1.13051		17.1386	1.08793		17.1386	1.0815		17.1386	1.04846		17.1386	1.06348		17.1386	1.06924		17.1386	1.01439		17.1386	1.06274
17.2131	1.13242		17.2131	1.05761		17.2131	1.0954		17.2131	1.14188		17.2131	1.09855		17.2131	1.04273		17.2131	1.11848		17.2131	1.08663		17.2131	1.13375		17.2131	1.08978		17.2131	1.0808		17.2131	1.05005		17.2131	1.06298		17.2131	1.06897		17.2131	1.01431		17.2131	1.06229
17.2876	1.13474		17.2876	1.05791		17.2876	1.09867		17.2876	1.14383		17.2876	1.09996		17.2876	1.04463		17.2876	1.11622		17.2876	1.08808		17.2876	1.13411		17.2876	1.08937		17.2876	1.08078		17.2876	1.05041		17.2876	1.06394		17.2876	1.07066		17.2876	1.01482		17.2876	1.06246
17.3621	1.13441		17.3621	1.05735		17.3621	1.09812		17.3621	1.14474		17.3621	1.10172		17.3621	1.0464		17.3621	1.11745		17.3621	1.08777		17.3621	1.1341		17.3621	1.08863		17.3621	1.08209		17.3621	1.05202		17.3621	1.06524		17.3621	1.07136		17.3621	1.01558		17.3621	1.06346
17.4366	1.13476		17.4366	1.05727		17.4366	1.09989		17.4366	1.14561		17.4366	1.10015		17.4366	1.04676		17.4366	1.11747		17.4366	1.09088		17.4366	1.1391		17.4366	1.08888		17.4366	1.08354		17.4366	1.05118		17.4366	1.06485		17.4366	1.07225		17.4366	1.01598		17.4366	1.06409
17.5112	1.13649		17.5112	1.0579		17.5112	1.10112		17.5112	1.14608		17.5112	1.10137		17.5112	1.04833		17.5112	1.11931		17.5112	1.09203		17.5112	1.13916		17.5112	1.08795		17.5112	1.08442		17.5112	1.05241		17.5112	1.06707		17.5112	1.07234		17.5112	1.01663		17.5112	1.06404
17.5857	1.13538		17.5857	1.05788		17.5857	1.10423		17.5857	1.1475		17.5857	1.10201		17.5857	1.04963		17.5857	1.11822		17.5857	1.09262		17.5857	1.14102		17.5857	1.08844		17.5857	1.08456		17.5857	1.0538		17.5857	1.06595		17.5857	1.07301		17.5857	1.01729		17.5857	1.06369
17.6602	1.13973		17.6602	1.05823		17.6602	1.10378		17.6602	1.14892		17.6602	1.10184		17.6602	1.05099		17.6602	1.12032		17.6602	1.09382		17.6602	1.14096		17.6602	1.08802		17.6602	1.08538		17.6602	1.0532		17.6602	1.06761		17.6602	1.07408		17.6602	1.01747		17.6602	1.06443
17.7347	1.1397		17.7347	1.0577		17.7347	1.10208		17.7347	1.14937		17.7347	1.10488		17.7347	1.05184		17.7347	1.12126		17.7347	1.0948		17.7347	1.14219		17.7347	1.08739		17.7347	1.0875		17.7347	1.05422		17.7347	1.06898		17.7347	1.07438		17.7347	1.0177		17.7347	1.06371
17.8092	1.14026		17.8092	1.05934		17.8092	1.10591		17.8092	1.15031		17.8092	1.10336		17.8092	1.05181		17.8092	1.12039		17.8092	1.09743		17.8092	1.14245		17.8092	1.08712		17.8092	1.0873		17.8092	1.05538		17.8092	1.0698		17.8092	1.07538		17.8092	1.0194		17.8092	1.06547
17.8837	1.14005		17.8837	1.05832		17.8837	1.10368		17.8837	1.14912		17.8837	1.10525		17.8837	1.05416		17.8837	1.12286		17.8837	1.09908		17.8837	1.14492		17.8837	1.08694		17.8837	1.08878		17.8837	1.05561		17.8837	1.07076		17.8837	1.07575		17.8837	1.01815		17.8837	1.06583
17.9583	1.14009		17.9583	1.05881		17.9583	1.10531		17.9583	1.15046		17.9583	1.10734		17.9583	1.05471		17.9583	1.1214		17.9583	1.10073		17.9583	1.14638		17.9583	1.08691		17.9583	1.08859		17.9583	1.05558		17.9583	1.07115		17.9583	1.07551		17.9583	1.01945		17.9583	1.06658
18.0328	1.14161		18.0328	1.06056		18.0328	1.10567		18.0328	1.15034		18.0328	1.10569		18.0328	1.0568		18.0328	1.12255		18.0328	1.10155		18.0328	1.14799		18.0328	1.08654		18.0328	1.08985		18.0328	1.05644		18.0328	1.07235		18.0328	1.07768		18.0328	1.01892		18.0328	1.06603
18.1073	1.14451		18.1073	1.06011		18.1073	1.10623		18.1073	1.15041		18.1073	1.1059		18.1073	1.05835		18.1073	1.12184		18.1073	1.10344		18.1073	1.14933		18.1073	1.08471		18.1073	1.0908		18.1073	1.05792		18.1073	1.07166		18.1073	1.07838		18.1073	1.01996		18.1073	1.06697
18.1818	1.14475		18.1818	1.06017		18.1818	1.10691		18.1818	1.15149		18.1818	1.10648		18.1818	1.05917		18.1818	1.1246		18.1818	1.10335		18.1818	1.14915		18.1818	1.08533		18.1818	1.09095		18.1818	1.05685		18.1818	1.07267		18.1818	1.07886		18.1818	1.02012		18.1818	1.06831
18.2563	1.14411		18.2563	1.06076		18.2563	1.10721		18.2563	1.15178		18.2563	1.10868		18.2563	1.05918		18.2563	1.12589		18.2563	1.10561		18.2563	1.14987		18.2563	1.08618		18.2563	1.09193		18.2563	1.05754		18.2563	1.07325		18.2563	1.08014		18.2563	1.0211		18.2563	1.06668
18.3308	1.14757		18.3308	1.06047		18.3308	1.10829		18.3308	1.15229		18.3308	1.10831		18.3308	1.06032		18.3308	1.12741		18.3308	1.10709		18.3308	1.15137		18.3308	1.08531		18.3308	1.09305		18.3308	1.05778		18.3308	1.07571		18.3308	1.07925		18.3308	1.02161		18.3308	1.06817
18.4054	1.14651		18.4054	1.06099		18.4054	1.10748		18.4054	1.15251		18.4054	1.11021		18.4054	1.06074		18.4054	1.12866		18.4054	1.10934		18.4054	1.1512		18.4054	1.08425		18.4054	1.09524		18.4054	1.05972		18.4054	1.07537		18.4054	1.08003		18.4054	1.02223		18.4054	1.06841
18.4799	1.14721		18.4799	1.05966		18.4799	1.10808		18.4799	1.15339		18.4799	1.11225		18.4799	1.06302		18.4799	1.12878		18.4799	1.11024		18.4799	1.15261		18.4799	1.0848		18.4799	1.0955		18.4799	1.05975		18.4799	1.07745		18.4799	1.08107		18.4799	1.02218		18.4799	1.068
18.5544	1.14642		18.5544	1.06224		18.5544	1.11038		18.5544	1.15489		18.5544	1.11228		18.5544	1.06427		18.5544	1.12953		18.5544	1.11161		18.5544	1.15336		18.5544	1.08491		18.5544	1.0956		18.5544	1.05994		18.5544	1.07583		18.5544	1.08047		18.5544	1.02129		18.5544	1.06879
18.6289	1.14693		18.6289	1.06121		18.6289	1.10883		18.6289	1.15553		18.6289	1.11253		18.6289	1.06509		18.6289	1.13113		18.6289	1.11393		18.6289	1.15324		18.6289	1.08504		18.6289	1.09635		18.6289	1.06008		18.6289	1.07785		18.6289	1.08179		18.6289	1.02269		18.6289	1.06855
18.7034	1.14768		18.7034	1.06164		18.7034	1.10913		18.7034	1.15637		18.7034	1.11426		18.7034	1.06555		18.7034	1.13273		18.7034	1.11352		18.7034	1.15473		18.7034	1.08682		18.7034	1.09868		18.7034	1.06205		18.7034	1.07926		18.7034	1.0824		18.7034	1.02274		18.7034	1.06939
18.7779	1.14732		18.7779	1.06232		18.7779	1.11021		18.7779	1.15666		18.7779	1.11486		18.7779	1.06669		18.7779	1.13369		18.7779	1.11598		18.7779	1.15603		18.7779	1.08643		18.7779	1.09963		18.7779	1.06221		18.7779	1.07933		18.7779	1.08361		18.7779	1.02498		18.7779	1.06988
18.8524	1.14902		18.8524	1.06309		18.8524	1.10865		18.8524	1.15627		18.8524	1.11624		18.8524	1.06882		18.8524	1.13296		18.8524	1.11543		18.8524	1.15664		18.8524	1.08603		18.8524	1.10173		18.8524	1.06254		18.8524	1.07978		18.8524	1.0843		18.8524	1.02388		18.8524	1.07043
18.927	1.15229		18.927	1.06295		18.927	1.10922		18.927	1.15689		18.927	1.11835		18.927	1.06974		18.927	1.13659		18.927	1.11811		18.927	1.15624		18.927	1.088		18.927	1.1025		18.927	1.06363		18.927	1.07972		18.927	1.08435		18.927	1.02429		18.927	1.07124
19.0015	1.15169		19.0015	1.06289		19.0015	1.10896		19.0015	1.15786		19.0015	1.11962		19.0015	1.07088		19.0015	1.13702		19.0015	1.11849		19.0015	1.15825		19.0015	1.08586		19.0015	1.1033		19.0015	1.06281		19.0015	1.08093		19.0015	1.08519		19.0015	1.02542		19.0015	1.0725
19.076	1.15197		19.076	1.06337		19.076	1.10985		19.076	1.15871		19.076	1.12083		19.076	1.07141		19.076	1.13531		19.076	1.11878		19.076	1.15915		19.076	1.08687		19.076	1.10285		19.076	1.06529		19.076	1.08266		19.076	1.08625		19.076	1.02582		19.076	1.07057
19.1505	1.15336		19.1505	1.06474		19.1505	1.11058		19.1505	1.15818		19.1505	1.12193		19.1505	1.07272		19.1505	1.13691		19.1505	1.1204		19.1505	1.15993		19.1505	1.08672		19.1505	1.1047		19.1505	1.06609		19.1505	1.08116		19.1505	1.08649		19.1505	1.02675		19.1505	1.07263
19.225	1.15382		19.225	1.06571		19.225	1.11029		19.225	1.15855		19.225	1.12209		19.225	1.0739		19.225	1.13561		19.225	1.1218		19.225	1.16031		19.225	1.08683		19.225	1.10574		19.225	1.06681		19.225	1.08246		19.225	1.08695		19.225	1.02743		19.225	1.07246
19.2995	1.15557		19.2995	1.06468		19.2995	1.11087		19.2995	1.16077		19.2995	1.12519		19.2995	1.07487		19.2995	1.13684		19.2995	1.12261		19.2995	1.16069		19.2995	1.0873		19.2995	1.10585		19.2995	1.06669		19.2995	1.08464		19.2995	1.0872		19.2995	1.02744		19.2995	1.0727
19.3741	1.15732		19.3741	1.06492		19.3741	1.11168		19.3741	1.15993		19.3741	1.12552		19.3741	1.07648		19.3741	1.1365		19.3741	1.12316		19.3741	1.16225		19.3741	1.0861		19.3741	1.10722		19.3741	1.06732		19.3741	1.084		19.3741	1.08923		19.3741	1.02831		19.3741	1.07441
19.4486	1.15734		19.4486	1.06545		19.4486	1.11313		19.4486	1.16031		19.4486	1.1272		19.4486	1.07709		19.4486	1.13524		19.4486	1.12318		19.4486	1.16295		19.4486	1.08585		19.4486	1.10774		19.4486	1.06709		19.4486	1.08585		19.4486	1.08902		19.4486	1.02966		19.4486	1.07376
19.5231	1.15586		19.5231	1.06602		19.5231	1.1119		19.5231	1.16083		19.5231	1.12776		19.5231	1.07759		19.5231	1.13534		19.5231	1.12473		19.5231	1.16082		19.5231	1.08741		19.5231	1.10806		19.5231	1.06839		19.5231	1.08707		19.5231	1.09102		19.5231	1.03028		19.5231	1.07476
19.5976	1.1569		19.5976	1.06621		19.5976	1.11324		19.5976	1.16252		19.5976	1.13089		19.5976	1.07901		19.5976	1.13624		19.5976	1.12621		19.5976	1.16311		19.5976	1.08796		19.5976	1.1099		19.5976	1.06785		19.5976	1.08752		19.5976	1.08968		19.5976	1.03086		19.5976	1.07395
19.6721	1.15977		19.6721	1.06636		19.6721	1.11341		19.6721	1.16214		19.6721	1.13119		19.6721	1.0808		19.6721	1.13769		19.6721	1.12583		19.6721	1.16303		19.6721	1.08844		19.6721	1.11008		19.6721	1.06879		19.6721	1.08856		19.6721	1.08945		19.6721	1.03164		19.6721	1.07489
19.7466	1.15849		19.7466	1.06562		19.7466	1.11535		19.7466	1.16149		19.7466	1.13279		19.7466	1.08113		19.7466	1.13641		19.7466	1.12593		19.7466	1.16257		19.7466	1.08882		19.7466	1.11145		19.7466	1.0687		19.7466	1.08884		19.7466	1.09186		19.7466	1.03213		19.7466	1.07523
19.8211	1.15877		19.8211	1.06662		19.8211	1.11449		19.8211	1.16284		19.8211	1.13436		19.8211	1.08297		19.8211	1.13635		19.8211	1.12776		19.8211	1.16203		19.8211	1.08946		19.8211	1.11114		19.8211	1.07052		19.8211	1.08981		19.8211	1.091		19.8211	1.03186		19.8211	1.07658
19.8957	1.16042		19.8957	1.06787		19.8957	1.11806		19.8957	1.16141		19.8957	1.13552		19.8957	1.08408		19.8957	1.13768		19.8957	1.12887		19.8957	1.16113		19.8957	1.08912		19.8957	1.11162		19.8957	1.06931		19.8957	1.09108		19.8957	1.09338		19.8957	1.03288		19.8957	1.07726
19.9702	1.16136		19.9702	1.06715		19.9702	1.11631		19.9702	1.16303		19.9702	1.1361		19.9702	1.08481		19.9702	1.13685		19.9702	1.12915		19.9702	1.1603		19.9702	1.08959		19.9702	1.1133		19.9702	1.06973		19.9702	1.09196		19.9702	1.09313		19.9702	1.03402		19.9702	1.0772
20.0447	1.16027		20.0447	1.06837		20.0447	1.11747		20.0447	1.16322		20.0447	1.13828		20.0447	1.08654		20.0447	1.13825		20.0447	1.13003		20.0447	1.16086		20.0447	1.09014		20.0447	1.11424		20.0447	1.07172		20.0447	1.09335		20.0447	1.09362		20.0447	1.03464		20.0447	1.0766
20.1192	1.16053		20.1192	1.06708		20.1192	1.1184		20.1192	1.16214		20.1192	1.14066		20.1192	1.0875		20.1192	1.13775		20.1192	1.13001		20.1192	1.16137		20.1192	1.09062		20.1192	1.11345		20.1192	1.07136		20.1192	1.09342		20.1192	1.09464		20.1192	1.03474		20.1192	1.07827
20.1937	1.16062		20.1937	1.06846		20.1937	1.11748		20.1937	1.16162		20.1937	1.14211		20.1937	1.08823		20.1937	1.13636		20.1937	1.13009		20.1937	1.16125		20.1937	1.09006		20.1937	1.11572		20.1937	1.07192		20.1937	1.09363		20.1937	1.09553		20.1937	1.03569		20.1937	1.08
20.2682	1.16187		20.2682	1.06965		20.2682	1.11999		20.2682	1.16255		20.2682	1.1432		20.2682	1.0888		20.2682	1.1387		20.2682	1.13029		20.2682	1.16166		20.2682	1.09103		20.2682	1.11602		20.2682	1.07154		20.2682	1.0953		20.2682	1.0957		20.2682	1.03603		20.2682	1.07908
20.3428	1.16236		20.3428	1.06958		20.3428	1.12005		20.3428	1.16348		20.3428	1.14472		20.3428	1.09119		20.3428	1.13857		20.3428	1.13145		20.3428	1.16343		20.3428	1.09104		20.3428	1.11566		20.3428	1.0718		20.3428	1.09606		20.3428	1.09728		20.3428	1.03654		20.3428	1.08067
20.4173	1.16177		20.4173	1.07032		20.4173	1.12055		20.4173	1.16312		20.4173	1.14658		20.4173	1.09154		20.4173	1.13892		20.4173	1.13214		20.4173	1.16271		20.4173	1.0907		20.4173	1.11733		20.4173	1.07211		20.4173	1.09607		20.4173	1.09712		20.4173	1.03711		20.4173	1.08129
20.4918	1.16299		20.4918	1.07132		20.4918	1.12148		20.4918	1.16309		20.4918	1.14724		20.4918	1.09179		20.4918	1.13904		20.4918	1.13066		20.4918	1.16244		20.4918	1.09259		20.4918	1.1173		20.4918	1.0729		20.4918	1.09749		20.4918	1.09761		20.4918	1.03738		20.4918	1.08073
20.5663	1.1641		20.5663	1.0723		20.5663	1.12219		20.5663	1.16167		20.5663	1.14939		20.5663	1.09235		20.5663	1.13861		20.5663	1.13243		20.5663	1.16296		20.5663	1.09196		20.5663	1.11876		20.5663	1.07171		20.5663	1.09625		20.5663	1.09859		20.5663	1.03783		20.5663	1.08339
20.6408	1.16477		20.6408	1.0732		20.6408	1.12322		20.6408	1.16213		20.6408	1.14956		20.6408	1.09474		20.6408	1.13793		20.6408	1.13253		20.6408	1.16377		20.6408	1.09277		20.6408	1.11788		20.6408	1.07446		20.6408	1.09758		20.6408	1.09859		20.6408	1.03839		20.6408	1.08411
20.7153	1.16719		20.7153	1.0731		20.7153	1.12229		20.7153	1.16255		20.7153	1.15068		20.7153	1.0942		20.7153	1.14		20.7153	1.13294		20.7153	1.16516		20.7153	1.09258		20.7153	1.1185		20.7153	1.07271		20.7153	1.09875		20.7153	1.09884		20.7153	1.04027		20.7153	1.08419
20.7899	1.16696		20.7899	1.07331		20.7899	1.12383		20.7899	1.16181		20.7899	1.15267		20.7899	1.09681		20.7899	1.13799		20.7899	1.13513		20.7899	1.16445		20.7899	1.09236		20.7899	1.11755		20.7899	1.07321		20.7899	1.09991		20.7899	1.09959		20.7899	1.04001		20.7899	1.08443
20.8644	1.1665		20.8644	1.0736		20.8644	1.12519		20.8644	1.16306		20.8644	1.15416		20.8644	1.09651		20.8644	1.14067		20.8644	1.13509		20.8644	1.16443		20.8644	1.09051		20.8644	1.12004		20.8644	1.07392		20.8644	1.10127		20.8644	1.10094		20.8644	1.04064		20.8644	1.08626
20.9389	1.16582		20.9389	1.07265		20.9389	1.12548		20.9389	1.16234		20.9389	1.15657		20.9389	1.09792		20.9389	1.13945		20.9389	1.13465		20.9389	1.16496		20.9389	1.0944		20.9389	1.12071		20.9389	1.07375		20.9389	1.10122		20.9389	1.101		20.9389	1.04128		20.9389	1.08631
21.0134	1.1763		21.0134	1.08138		21.0134	1.13425		21.0134	1.17151		21.0134	1.16318		21.0134	1.10621		21.0134	1.14738		21.0134	1.14196		21.0134	1.17169		21.0134	1.0992		21.0134	1.12735		21.0134	1.08212		21.0134	1.10771		21.0134	1.10846		21.0134	1.0465		21.0134	1.09299
21.0879	1.20246		21.0879	1.10341		21.0879	1.15354		21.0879	1.19099		21.0879	1.18538		21.0879	1.1295		21.0879	1.16732		21.0879	1.16355		21.0879	1.1961		21.0879	1.1214		21.0879	1.15029		21.0879	1.10486		21.0879	1.13031		21.0879	1.12978		21.0879	1.06797		21.0879	1.11298
21.1624	1.2133		21.1624	1.1157		21.1624	1.16461		21.1624	1.20059		21.1624	1.19698		21.1624	1.13855		21.1624	1.17759		21.1624	1.17209		21.1624	1.20905		21.1624	1.12987		21.1624	1.16002		21.1624	1.11302		21.1624	1.14091		21.1624	1.13967		21.1624	1.07759		21.1624	1.12342
21.2369	1.21878		21.2369	1.1226		21.2369	1.17418		21.2369	1.2064		21.2369	1.20554		21.2369	1.14609		21.2369	1.18458		21.2369	1.17983		21.2369	1.21472		21.2369	1.13791		21.2369	1.16602		21.2369	1.12013		21.2369	1.14835		21.2369	1.14677		21.2369	1.08375		21.2369	1.13015
21.3115	1.2256		21.3115	1.12988		21.3115	1.17766		21.3115	1.21041		21.3115	1.21121		21.3115	1.15199		21.3115	1.18782		21.3115	1.18395		21.3115	1.22029		21.3115	1.14095		21.3115	1.17201		21.3115	1.12537		21.3115	1.15408		21.3115	1.15326		21.3115	1.08905		21.3115	1.13531
21.386	1.23066		21.386	1.13307		21.386	1.18317		21.386	1.21519		21.386	1.21505		21.386	1.15544		21.386	1.19344		21.386	1.18904		21.386	1.22418		21.386	1.14643		21.386	1.17668		21.386	1.1286		21.386	1.1581		21.386	1.15758		21.386	1.09302		21.386	1.14105
21.4605	1.23393		21.4605	1.1386		21.4605	1.1862		21.4605	1.21629		21.4605	1.22039		21.4605	1.15929		21.4605	1.19619		21.4605	1.19127		21.4605	1.22887		21.4605	1.15005		21.4605	1.18207		21.4605	1.13322		21.4605	1.1607		21.4605	1.16068		21.4605	1.09745		21.4605	1.14371
21.535	1.23699		21.535	1.14257		21.535	1.19063		21.535	1.22021		21.535	1.2237		21.535	1.16189		21.535	1.19864		21.535	1.19519		21.535	1.23189		21.535	1.15388		21.535	1.1846		21.535	1.1362		21.535	1.16566		21.535	1.16443		21.535	1.09965		21.535	1.14662
21.6095	1.24193		21.6095	1.14499		21.6095	1.19437		21.6095	1.2222		21.6095	1.22706		21.6095	1.1651		21.6095	1.20318		21.6095	1.19858		21.6095	1.23561		21.6095	1.157		21.6095	1.18832		21.6095	1.13986		21.6095	1.16879		21.6095	1.16668		21.6095	1.1033		21.6095	1.14881
21.684	1.24484		21.684	1.14825		21.684	1.19551		21.684	1.2267		21.684	1.22962		21.684	1.16672		21.684	1.20569		21.684	1.20074		21.684	1.2393		21.684	1.15952		21.684	1.19019		21.684	1.14238		21.684	1.17126		21.684	1.17068		21.684	1.1051		21.684	1.15089
21.7586	1.24807		21.7586	1.15155		21.7586	1.19963		21.7586	1.22728		21.7586	1.23333		21.7586	1.17065		21.7586	1.2064		21.7586	1.20255		21.7586	1.24179		21.7586	1.16142		21.7586	1.19167		21.7586	1.14572		21.7586	1.17485		21.7586	1.17278		21.7586	1.10792		21.7586	1.15483

## Sheet: RawData-2
Figure 1 - Figure Supplement 2d - replicate 2
NanoTemper Technologies	NanoTemper Technologies
MO.Affinity Analysis v2.3	MO.Affinity Analysis v2.3
Origin of exported data	Origin of exported data
Project Title:
Comment:
Project File Path:
Analysis-Set Name:	Analysis-Set #1
Exported from:	MST Traces
Exported on:	2023-03-15 13:36:50
Analysis Settings	Analysis Settings
Type of Analysis:	MST
Evaluation strategy:	On Time
Cold Region Start:	-1
Cold Region End:	0
Hot Region Start:	4
Hot Region End:	5
Sample Information	Sample Information		Sample Information	Sample Information		Sample Information	Sample Information		Sample Information	Sample Information		Sample Information	Sample Information		Sample Information	Sample Information		Sample Information	Sample Information		Sample Information	Sample Information		Sample Information	Sample Information		Sample Information	Sample Information		Sample Information	Sample Information		Sample Information	Sample Information		Sample Information	Sample Information		Sample Information	Sample Information		Sample Information	Sample Information		Sample Information	Sample Information
Merge-Set Name:	Experiment 9 (#09)		Merge-Set Name:	Experiment 9 (#09)		Merge-Set Name:	Experiment 9 (#09)		Merge-Set Name:	Experiment 9 (#09)		Merge-Set Name:	Experiment 9 (#09)		Merge-Set Name:	Experiment 9 (#09)		Merge-Set Name:	Experiment 9 (#09)		Merge-Set Name:	Experiment 9 (#09)		Merge-Set Name:	Experiment 9 (#09)		Merge-Set Name:	Experiment 9 (#09)		Merge-Set Name:	Experiment 9 (#09)		Merge-Set Name:	Experiment 9 (#09)		Merge-Set Name:	Experiment 9 (#09)		Merge-Set Name:	Experiment 9 (#09)		Merge-Set Name:	Experiment 9 (#09)		Merge-Set Name:	Experiment 9 (#09)
Run Name:	Experiment 9 (#09)		Run Name:	Experiment 9 (#09)		Run Name:	Experiment 9 (#09)		Run Name:	Experiment 9 (#09)		Run Name:	Experiment 9 (#09)		Run Name:	Experiment 9 (#09)		Run Name:	Experiment 9 (#09)		Run Name:	Experiment 9 (#09)		Run Name:	Experiment 9 (#09)		Run Name:	Experiment 9 (#09)		Run Name:	Experiment 9 (#09)		Run Name:	Experiment 9 (#09)		Run Name:	Experiment 9 (#09)		Run Name:	Experiment 9 (#09)		Run Name:	Experiment 9 (#09)		Run Name:	Experiment 9 (#09)
Date of Measurement:	2022-05-27 02:44:38		Date of Measurement:	2022-05-27 02:45:19		Date of Measurement:	2022-05-27 02:45:59		Date of Measurement:	2022-05-27 02:46:40		Date of Measurement:	2022-05-27 02:47:20		Date of Measurement:	2022-05-27 02:48:00		Date of Measurement:	2022-05-27 02:48:41		Date of Measurement:	2022-05-27 02:49:21		Date of Measurement:	2022-05-27 02:50:02		Date of Measurement:	2022-05-27 02:50:42		Date of Measurement:	2022-05-27 02:51:23		Date of Measurement:	2022-05-27 02:52:03		Date of Measurement:	2022-05-27 02:52:44		Date of Measurement:	2022-05-27 02:53:24		Date of Measurement:	2022-05-27 02:54:05		Date of Measurement:	2022-05-27 02:54:46
Capillary Type:	Monolith NT.115 Premium Capillary		Capillary Type:	Monolith NT.115 Premium Capillary		Capillary Type:	Monolith NT.115 Premium Capillary		Capillary Type:	Monolith NT.115 Premium Capillary		Capillary Type:	Monolith NT.115 Premium Capillary		Capillary Type:	Monolith NT.115 Premium Capillary		Capillary Type:	Monolith NT.115 Premium Capillary		Capillary Type:	Monolith NT.115 Premium Capillary		Capillary Type:	Monolith NT.115 Premium Capillary		Capillary Type:	Monolith NT.115 Premium Capillary		Capillary Type:	Monolith NT.115 Premium Capillary		Capillary Type:	Monolith NT.115 Premium Capillary		Capillary Type:	Monolith NT.115 Premium Capillary		Capillary Type:	Monolith NT.115 Premium Capillary		Capillary Type:	Monolith NT.115 Premium Capillary		Capillary Type:	Monolith NT.115 Premium Capillary
Capillary Position:	1		Capillary Position:	2		Capillary Position:	3		Capillary Position:	4		Capillary Position:	5		Capillary Position:	6		Capillary Position:	7		Capillary Position:	8		Capillary Position:	9		Capillary Position:	10		Capillary Position:	11		Capillary Position:	12		Capillary Position:	13		Capillary Position:	14		Capillary Position:	15		Capillary Position:	16
Ligand:	penicillin		Ligand:	penicillin		Ligand:	penicillin		Ligand:	penicillin		Ligand:	penicillin		Ligand:	penicillin		Ligand:	penicillin		Ligand:	penicillin		Ligand:	penicillin		Ligand:	penicillin		Ligand:	penicillin		Ligand:	penicillin		Ligand:	penicillin		Ligand:	penicillin		Ligand:	penicillin		Ligand:	penicillin
Ligand Concentration:	0.01		Ligand Concentration:	0.005		Ligand Concentration:	0.0025		Ligand Concentration:	0.00125		Ligand Concentration:	0.000625		Ligand Concentration:	0.0003125		Ligand Concentration:	0.00015625		Ligand Concentration:	7.8125e-05		Ligand Concentration:	3.90625e-05		Ligand Concentration:	1.95313e-05		Ligand Concentration:	9.76563e-06		Ligand Concentration:	4.88281e-06		Ligand Concentration:	2.44141e-06		Ligand Concentration:	1.2207e-06		Ligand Concentration:	6.10352e-07		Ligand Concentration:	3.05176e-07
Target:	DltE		Target:	DltE		Target:	DltE		Target:	DltE		Target:	DltE		Target:	DltE		Target:	DltE		Target:	DltE		Target:	DltE		Target:	DltE		Target:	DltE		Target:	DltE		Target:	DltE		Target:	DltE		Target:	DltE		Target:	penicillin
TargetConcentration:	2e-08		TargetConcentration:	2e-08		TargetConcentration:	2e-08		TargetConcentration:	2e-08		TargetConcentration:	2e-08		TargetConcentration:	2e-08		TargetConcentration:	2e-08		TargetConcentration:	2e-08		TargetConcentration:	2e-08		TargetConcentration:	2e-08		TargetConcentration:	2e-08		TargetConcentration:	2e-08		TargetConcentration:	2e-08		TargetConcentration:	2e-08		TargetConcentration:	2e-08		TargetConcentration:	2e-08
Measurement Settings	Measurement Settings		Measurement Settings	Measurement Settings		Measurement Settings	Measurement Settings		Measurement Settings	Measurement Settings		Measurement Settings	Measurement Settings		Measurement Settings	Measurement Settings		Measurement Settings	Measurement Settings		Measurement Settings	Measurement Settings		Measurement Settings	Measurement Settings		Measurement Settings	Measurement Settings		Measurement Settings	Measurement Settings		Measurement Settings	Measurement Settings		Measurement Settings	Measurement Settings		Measurement Settings	Measurement Settings		Measurement Settings	Measurement Settings		Measurement Settings	Measurement Settings
MST-Power:	Medium		MST-Power:	Medium		MST-Power:	Medium		MST-Power:	Medium		MST-Power:	Medium		MST-Power:	Medium		MST-Power:	Medium		MST-Power:	Medium		MST-Power:	Medium		MST-Power:	Medium		MST-Power:	Medium		MST-Power:	Medium		MST-Power:	Medium		MST-Power:	Medium		MST-Power:	Medium		MST-Power:	Medium
Excitation-Power:	60		Excitation-Power:	60		Excitation-Power:	60		Excitation-Power:	60		Excitation-Power:	60		Excitation-Power:	60		Excitation-Power:	60		Excitation-Power:	60		Excitation-Power:	60		Excitation-Power:	60		Excitation-Power:	60		Excitation-Power:	60		Excitation-Power:	60		Excitation-Power:	60		Excitation-Power:	60		Excitation-Power:	60
Excitation type:	Nano - RED		Excitation type:	Nano - RED		Excitation type:	Nano - RED		Excitation type:	Nano - RED		Excitation type:	Nano - RED		Excitation type:	Nano - RED		Excitation type:	Nano - RED		Excitation type:	Nano - RED		Excitation type:	Nano - RED		Excitation type:	Nano - RED		Excitation type:	Nano - RED		Excitation type:	Nano - RED		Excitation type:	Nano - RED		Excitation type:	Nano - RED		Excitation type:	Nano - RED		Excitation type:	Nano - RED
Thermostat Setpoint:	22		Thermostat Setpoint:	22		Thermostat Setpoint:	22		Thermostat Setpoint:	22		Thermostat Setpoint:	22		Thermostat Setpoint:	22		Thermostat Setpoint:	22		Thermostat Setpoint:	22		Thermostat Setpoint:	22		Thermostat Setpoint:	22		Thermostat Setpoint:	22		Thermostat Setpoint:	22		Thermostat Setpoint:	22		Thermostat Setpoint:	22		Thermostat Setpoint:	22		Thermostat Setpoint:	22
Included	Included		Included	Included		Included	Included		Included	Included		Included	Included		Included	Included		Included	Included		Included	Included		Included	Included		Included	Included		Included	Included		Included	Included		Included	Included		Included	Included		Included	Included		Included	Included
Time [s]	Normalized Fluorescence [-]		Time [s]	Normalized Fluorescence [-]		Time [s]	Normalized Fluorescence [-]		Time [s]	Normalized Fluorescence [-]		Time [s]	Normalized Fluorescence [-]		Time [s]	Normalized Fluorescence [-]		Time [s]	Normalized Fluorescence [-]		Time [s]	Normalized Fluorescence [-]		Time [s]	Normalized Fluorescence [-]		Time [s]	Normalized Fluorescence [-]		Time [s]	Normalized Fluorescence [-]		Time [s]	Normalized Fluorescence [-]		Time [s]	Normalized Fluorescence [-]		Time [s]	Normalized Fluorescence [-]		Time [s]	Normalized Fluorescence [-]		Time [s]	Normalized Fluorescence [-]
-3.57675	1.0006		-3.57675	1.00019		-3.57675	1.00072		-3.57675	0.999456		-3.57675	0.999689		-3.57675	0.999832		-3.57675	1.0003		-3.57675	1.00094		-3.57675	1.00024		-3.57675	0.998731		-3.57675	1.00018		-3.57675	1.00036		-3.57675	0.999592		-3.57675	0.99965		-3.57675	0.999724		-3.57675	1.00007
-3.50223	1.00021		-3.50223	1.00006		-3.50223	0.999277		-3.50223	0.999788		-3.50223	1.00136		-3.50223	1.00068		-3.50223	0.998926		-3.50223	0.999623		-3.50223	1.00026		-3.50223	1.00063		-3.50223	0.999674		-3.50223	1.00013		-3.50223	0.999368		-3.50223	0.999782		-3.50223	0.999606		-3.50223	0.999794
-3.42772	0.999581		-3.42772	0.999734		-3.42772	1.00015		-3.42772	1.00048		-3.42772	1.00065		-3.42772	0.998976		-3.42772	0.99954		-3.42772	1.00053		-3.42772	1.00048		-3.42772	1.00071		-3.42772	1.00003		-3.42772	0.999815		-3.42772	1.00124		-3.42772	0.999658		-3.42772	0.998717		-3.42772	1.00011
-3.3532	0.99975		-3.3532	0.99977		-3.3532	0.998403		-3.3532	0.999277		-3.3532	1.00045		-3.3532	1.00037		-3.3532	0.99856		-3.3532	1		-3.3532	1.00014		-3.3532	0.998837		-3.3532	0.999325		-3.3532	1.00044		-3.3532	1.00076		-3.3532	1.00005		-3.3532	0.999858		-3.3532	1.00043
-3.27869	1.00085		-3.27869	0.999583		-3.27869	0.999572		-3.27869	0.999147		-3.27869	0.999889		-3.27869	0.999464		-3.27869	0.999962		-3.27869	0.999901		-3.27869	0.999568		-3.27869	0.99921		-3.27869	1.00041		-3.27869	0.999546		-3.27869	1.00024		-3.27869	0.999784		-3.27869	1.00053		-3.27869	0.999201
-3.20417	0.999434		-3.20417	0.999818		-3.20417	1.00012		-3.20417	0.999235		-3.20417	1.00008		-3.20417	0.999756		-3.20417	0.998965		-3.20417	0.99983		-3.20417	0.999153		-3.20417	0.998917		-3.20417	1.00024		-3.20417	0.999062		-3.20417	0.999357		-3.20417	1.00023		-3.20417	1.00085		-3.20417	0.999487
-3.12966	0.998329		-3.12966	0.999883		-3.12966	0.999165		-3.12966	0.998965		-3.12966	0.99887		-3.12966	1.00011		-3.12966	0.999545		-3.12966	0.998707		-3.12966	1.00044		-3.12966	1.0006		-3.12966	0.999194		-3.12966	0.999865		-3.12966	0.9995		-3.12966	0.999834		-3.12966	0.99981		-3.12966	0.999204
-3.05514	1.00054		-3.05514	1.00074		-3.05514	1.00046		-3.05514	0.998911		-3.05514	0.999155		-3.05514	1.00061		-3.05514	0.999095		-3.05514	0.999654		-3.05514	0.998474		-3.05514	0.999486		-3.05514	0.999388		-3.05514	1.00006		-3.05514	0.999724		-3.05514	0.999198		-3.05514	0.999462		-3.05514	0.999433
-2.98062	1.00104		-2.98062	0.999113		-2.98062	0.999295		-2.98062	0.999135		-2.98062	0.999771		-2.98062	0.999427		-2.98062	0.999509		-2.98062	0.999539		-2.98062	0.999984		-2.98062	0.998291		-2.98062	0.998853		-2.98062	1.00073		-2.98062	0.999779		-2.98062	1.00076		-2.98062	0.999152		-2.98062	0.999591
-2.90611	0.999323		-2.90611	1.0001		-2.90611	0.998376		-2.90611	0.999797		-2.90611	0.998962		-2.90611	0.998992		-2.90611	0.999644		-2.90611	0.998764		-2.90611	0.999426		-2.90611	1.0005		-2.90611	1.0003		-2.90611	0.999271		-2.90611	0.999736		-2.90611	0.999924		-2.90611	0.99998		-2.90611	0.999425
-2.83159	0.998653		-2.83159	0.9993		-2.83159	0.99937		-2.83159	0.998776		-2.83159	0.998056		-2.83159	0.998468		-2.83159	0.999841		-2.83159	1.00011		-2.83159	0.999477		-2.83159	0.998694		-2.83159	0.999513		-2.83159	0.999406		-2.83159	0.999138		-2.83159	1.00046		-2.83159	0.998667		-2.83159	0.999494
-2.75708	0.999688		-2.75708	0.999756		-2.75708	0.999648		-2.75708	0.999574		-2.75708	0.999581		-2.75708	0.998501		-2.75708	0.999858		-2.75708	0.998923		-2.75708	0.997718		-2.75708	0.998311		-2.75708	0.999682		-2.75708	0.997559		-2.75708	0.998687		-2.75708	0.999119		-2.75708	0.999191		-2.75708	0.999808
-2.68256	0.998945		-2.68256	0.999185		-2.68256	0.999147		-2.68256	0.998911		-2.68256	0.999528		-2.68256	0.998554		-2.68256	0.999582		-2.68256	0.999613		-2.68256	1.00014		-2.68256	0.998791		-2.68256	0.999854		-2.68256	0.999364		-2.68256	0.998662		-2.68256	0.999811		-2.68256	0.999932		-2.68256	0.999057
-2.60805	0.999836		-2.60805	0.998614		-2.60805	0.998969		-2.60805	0.999063		-2.60805	0.998396		-2.60805	0.99793		-2.60805	1.00027		-2.60805	0.999044		-2.60805	0.998956		-2.60805	0.999796		-2.60805	1.00077		-2.60805	0.999663		-2.60805	0.99911		-2.60805	0.998667		-2.60805	0.998435		-2.60805	0.999501
-2.53353	0.998386		-2.53353	0.999626		-2.53353	0.999566		-2.53353	0.999029		-2.53353	0.999298		-2.53353	0.999022		-2.53353	0.998543		-2.53353	0.9996		-2.53353	0.999821		-2.53353	0.999836		-2.53353	0.999649		-2.53353	0.998785		-2.53353	0.999846		-2.53353	0.998609		-2.53353	0.999399		-2.53353	0.998401
-2.45901	0.999548		-2.45901	0.997597		-2.45901	0.999238		-2.45901	0.999542		-2.45901	0.999724		-2.45901	0.998398		-2.45901	0.999157		-2.45901	0.999017		-2.45901	1.00013		-2.45901	0.9992		-2.45901	0.999252		-2.45901	0.999126		-2.45901	0.999013		-2.45901	0.998697		-2.45901	0.999281		-2.45901	0.9999
-2.3845	0.999536		-2.3845	0.999017		-2.3845	0.999295		-2.3845	0.999527		-2.3845	0.999829		-2.3845	0.998664		-2.3845	0.999075		-2.3845	0.998613		-2.3845	0.999166		-2.3845	0.999133		-2.3845	1.00087		-2.3845	0.999668		-2.3845	0.999274		-2.3845	0.998648		-2.3845	0.999018		-2.3845	0.998396
-2.30998	1.00001		-2.30998	0.998933		-2.30998	0.997999		-2.30998	0.998722		-2.30998	0.99905		-2.30998	0.998099		-2.30998	0.999982		-2.30998	0.999224		-2.30998	0.9992		-2.30998	0.998368		-2.30998	0.999025		-2.30998	0.999483		-2.30998	0.99911		-2.30998	0.998842		-2.30998	0.999346		-2.30998	0.9988
-2.23547	0.999906		-2.23547	0.997877		-2.23547	0.998758		-2.23547	0.999667		-2.23547	0.998218		-2.23547	0.999065		-2.23547	0.997476		-2.23547	0.998678		-2.23547	1.00004		-2.23547	0.998215		-2.23547	1.00027		-2.23547	0.999383		-2.23547	0.999138		-2.23547	0.998766		-2.23547	0.998409		-2.23547	0.998592
-2.16095	0.998596		-2.16095	0.997714		-2.16095	0.999295		-2.16095	0.998695		-2.16095	0.999623		-2.16095	0.999374		-2.16095	0.998394		-2.16095	0.998611		-2.16095	1.00101		-2.16095	0.997739		-2.16095	1.00006		-2.16095	0.998226		-2.16095	0.999657		-2.16095	0.998315		-2.16095	0.999908		-2.16095	0.999385
-2.08644	0.999799		-2.08644	0.998307		-2.08644	0.997737		-2.08644	0.999144		-2.08644	0.998542		-2.08644	0.996881		-2.08644	0.999022		-2.08644	0.999523		-2.08644	0.999409		-2.08644	0.998318		-2.08644	0.999782		-2.08644	0.998563		-2.08644	0.997808		-2.08644	1.0002		-2.08644	0.997679		-2.08644	0.998824
-2.01192	0.99954		-2.01192	0.99858		-2.01192	0.998213		-2.01192	0.998526		-2.01192	0.999253		-2.01192	0.998919		-2.01192	0.997906		-2.01192	0.999378		-2.01192	1.00025		-2.01192	0.998887		-2.01192	0.997901		-2.01192	0.999166		-2.01192	0.999274		-2.01192	0.999702		-2.01192	0.999477		-2.01192	0.999756
-1.93741	0.99984		-1.93741	0.998424		-1.93741	0.998508		-1.93741	0.998609		-1.93741	0.997542		-1.93741	0.998471		-1.93741	0.999016		-1.93741	0.999341		-1.93741	0.998932		-1.93741	0.997333		-1.93741	0.999688		-1.93741	0.998775		-1.93741	0.99935		-1.93741	0.999081		-1.93741	0.998107		-1.93741	1.00027
-1.86289	0.998493		-1.86289	0.998398		-1.86289	0.998876		-1.86289	0.99694		-1.86289	0.998266		-1.86289	0.998564		-1.86289	0.999647		-1.86289	0.999272		-1.86289	0.998902		-1.86289	0.997845		-1.86289	1.00106		-1.86289	0.999259		-1.86289	0.999191		-1.86289	0.999874		-1.86289	0.999213		-1.86289	0.99855
-1.78837	1.00063		-1.78837	0.997753		-1.78837	0.997963		-1.78837	0.997389		-1.78837	0.999005		-1.78837	0.998939		-1.78837	0.99738		-1.78837	0.99901		-1.78837	0.998439		-1.78837	0.997852		-1.78837	0.999585		-1.78837	0.997744		-1.78837	0.998729		-1.78837	0.997561		-1.78837	0.998217		-1.78837	0.998569
-1.71386	0.997158		-1.71386	0.997945		-1.71386	0.998327		-1.71386	0.996896		-1.71386	0.998662		-1.71386	0.997273		-1.71386	0.99852		-1.71386	0.998609		-1.71386	0.997818		-1.71386	0.998578		-1.71386	0.998842		-1.71386	0.998897		-1.71386	0.998456		-1.71386	0.998336		-1.71386	0.997747		-1.71386	0.999258
-1.63934	0.998181		-1.63934	0.998096		-1.63934	0.998701		-1.63934	0.99746		-1.63934	0.999145		-1.63934	0.998146		-1.63934	0.998816		-1.63934	0.999328		-1.63934	0.998476		-1.63934	0.996754		-1.63934	0.998057		-1.63934	0.998982		-1.63934	0.998357		-1.63934	0.99829		-1.63934	0.99771		-1.63934	0.999574
-1.56483	0.996743		-1.56483	0.997366		-1.56483	0.998514		-1.56483	0.996925		-1.56483	0.999501		-1.56483	0.998245		-1.56483	1.00006		-1.56483	0.998526		-1.56483	0.997799		-1.56483	0.997266		-1.56483	0.999255		-1.56483	0.997769		-1.56483	0.998429		-1.56483	0.998764		-1.56483	0.996702		-1.56483	0.998458
-1.49031	0.997926		-1.49031	0.99752		-1.49031	0.999193		-1.49031	0.997784		-1.49031	0.998747		-1.49031	0.997698		-1.49031	0.997332		-1.49031	0.998542		-1.49031	0.999914		-1.49031	0.998308		-1.49031	0.999078		-1.49031	1.00061		-1.49031	0.998332		-1.49031	0.998972		-1.49031	0.998011		-1.49031	0.998901
-1.4158	0.999914		-1.4158	0.997047		-1.4158	0.999202		-1.4158	0.998717		-1.4158	0.998011		-1.4158	0.998059		-1.4158	0.997687		-1.4158	0.99887		-1.4158	1.00008		-1.4158	0.997616		-1.4158	0.998376		-1.4158	0.998478		-1.4158	0.997759		-1.4158	0.998709		-1.4158	0.998485		-1.4158	0.998208
-1.34128	0.998115		-1.34128	0.997712		-1.34128	1.00002		-1.34128	0.995992		-1.34128	0.99795		-1.34128	0.99795		-1.34128	0.998318		-1.34128	0.998992		-1.34128	0.998595		-1.34128	0.997383		-1.34128	0.99877		-1.34128	0.998897		-1.34128	0.99814		-1.34128	0.998583		-1.34128	0.998879		-1.34128	0.999005
-1.26677	0.999006		-1.26677	0.997916		-1.26677	0.996401		-1.26677	0.997129		-1.26677	0.998494		-1.26677	0.99784		-1.26677	0.99765		-1.26677	0.999299		-1.26677	0.998627		-1.26677	0.998934		-1.26677	0.998695		-1.26677	0.999658		-1.26677	0.998655		-1.26677	0.998103		-1.26677	0.998077		-1.26677	0.997894
-1.19225	0.997939		-1.19225	0.997772		-1.19225	0.998002		-1.19225	0.996611		-1.19225	0.997294		-1.19225	0.997967		-1.19225	0.999582		-1.19225	0.998001		-1.19225	0.999387		-1.19225	0.999027		-1.19225	0.997954		-1.19225	0.998375		-1.19225	0.998826		-1.19225	0.997983		-1.19225	0.997843		-1.19225	0.997511
-1.11773	0.997865		-1.11773	0.998854		-1.11773	0.9983		-1.11773	0.997873		-1.11773	0.998246		-1.11773	0.997668		-1.11773	0.99901		-1.11773	0.99913		-1.11773	0.999229		-1.11773	0.997246		-1.11773	0.99978		-1.11773	0.997969		-1.11773	0.997923		-1.11773	0.998541		-1.11773	0.99854		-1.11773	0.998869
-1.04322	0.999557		-1.04322	0.998952		-1.04322	0.996522		-1.04322	0.998418		-1.04322	0.99781		-1.04322	0.997405		-1.04322	0.997149		-1.04322	0.998597		-1.04322	0.999022		-1.04322	0.997356		-1.04322	0.998739		-1.04322	0.999191		-1.04322	0.998255		-1.04322	0.998892		-1.04322	0.998581		-1.04322	0.998824
-0.968703	0.999959		-0.968703	0.998223		-0.968703	0.997728		-0.968703	0.996363		-0.968703	0.999433		-0.968703	0.996695		-0.968703	0.998886		-0.968703	0.999765		-0.968703	0.998513		-0.968703	0.999526		-0.968703	0.99751		-0.968703	0.997477		-0.968703	0.997667		-0.968703	0.999494		-0.968703	0.997985		-0.968703	0.999012
-0.894187	0.998982		-0.894187	0.9984		-0.894187	0.997266		-0.894187	0.997686		-0.894187	0.998764		-0.894187	0.997515		-0.894187	0.997901		-0.894187	0.998831		-0.894187	0.997621		-0.894187	0.998601		-0.894187	0.998783		-0.894187	0.997759		-0.894187	0.998415		-0.894187	0.998388		-0.894187	0.997825		-0.894187	0.997929
-0.819672	0.999031		-0.819672	0.998134		-0.819672	0.997293		-0.819672	0.996879		-0.819672	0.999035		-0.819672	0.997887		-0.819672	0.996459		-0.819672	0.9978		-0.819672	0.998098		-0.819672	0.997689		-0.819672	0.999718		-0.819672	0.998635		-0.819672	0.997736		-0.819672	0.99877		-0.819672	0.997696		-0.819672	0.998349
-0.745156	0.998357		-0.745156	0.997335		-0.745156	0.997824		-0.745156	0.997276		-0.745156	0.997885		-0.745156	0.996449		-0.745156	0.997101		-0.745156	0.998473		-0.745156	0.997362		-0.745156	0.997656		-0.745156	0.99918		-0.745156	0.99721		-0.745156	0.999297		-0.745156	0.998411		-0.745156	0.99696		-0.745156	0.997261
-0.67064	0.999216		-0.67064	0.997337		-0.67064	0.997688		-0.67064	0.9975		-0.67064	0.998106		-0.67064	0.997469		-0.67064	0.996825		-0.67064	0.998496		-0.67064	0.997499		-0.67064	0.998118		-0.67064	0.999275		-0.67064	0.998585		-0.67064	0.998309		-0.67064	0.998436		-0.67064	0.997675		-0.67064	0.999289
-0.596125	0.999376		-0.596125	0.997932		-0.596125	0.996341		-0.596125	0.996731		-0.596125	0.998577		-0.596125	0.998093		-0.596125	0.998512		-0.596125	0.999493		-0.596125	0.998532		-0.596125	0.997725		-0.596125	0.999557		-0.596125	0.997395		-0.596125	0.998029		-0.596125	0.998132		-0.596125	0.998077		-0.596125	0.997962
-0.521609	0.998702		-0.521609	0.997748		-0.521609	0.997317		-0.521609	0.996488		-0.521609	0.997169		-0.521609	0.99552		-0.521609	0.996887		-0.521609	0.998237		-0.521609	0.999224		-0.521609	0.99685		-0.521609	0.999624		-0.521609	0.998405		-0.521609	0.99823		-0.521609	0.998048		-0.521609	0.997616		-0.521609	0.998153
-0.447094	0.99915		-0.447094	0.997429		-0.447094	0.99588		-0.447094	0.995568		-0.447094	0.997675		-0.447094	0.996048		-0.447094	0.997991		-0.447094	0.997457		-0.447094	1.0003		-0.447094	0.996694		-0.447094	0.997488		-0.447094	0.998201		-0.447094	0.999897		-0.447094	0.997767		-0.447094	0.997399		-0.447094	0.997887
-0.372578	0.998813		-0.372578	0.997642		-0.372578	0.99676		-0.372578	0.996277		-0.372578	0.998153		-0.372578	0.997386		-0.372578	0.997284		-0.372578	0.998252		-0.372578	0.998003		-0.372578	0.996897		-0.372578	0.997407		-0.372578	0.997105		-0.372578	0.99742		-0.372578	0.998397		-0.372578	0.996855		-0.372578	0.998363
-0.298063	0.997343		-0.298063	0.997158		-0.298063	0.996205		-0.298063	0.997554		-0.298063	0.997585		-0.298063	0.995623		-0.298063	0.996118		-0.298063	0.998674		-0.298063	0.998259		-0.298063	0.997785		-0.298063	1.00025		-0.298063	0.998136		-0.298063	0.997565		-0.298063	0.998323		-0.298063	0.997887		-0.298063	0.997212
-0.223547	0.998333		-0.223547	0.996745		-0.223547	0.99808		-0.223547	0.995973		-0.223547	0.997833		-0.223547	0.996808		-0.223547	0.996555		-0.223547	0.997305		-0.223547	0.998254		-0.223547	0.998032		-0.223547	0.999535		-0.223547	0.99856		-0.223547	0.997727		-0.223547	0.997664		-0.223547	0.996973		-0.223547	0.997426
-0.149031	0.998058		-0.149031	0.996008		-0.149031	0.997088		-0.149031	0.997593		-0.149031	0.997505		-0.149031	0.996144		-0.149031	0.996856		-0.149031	0.997854		-0.149031	0.999122		-0.149031	0.997636		-0.149031	0.999055		-0.149031	0.997452		-0.149031	0.997766		-0.149031	0.996705		-0.149031	0.996678		-0.149031	0.997162
-0.0745156	0.997692		-0.0745156	0.997064		-0.0745156	0.997471		-0.0745156	0.995909		-0.0745156	0.99776		-0.0745156	0.996685		-0.0745156	0.996574		-0.0745156	0.99776		-0.0745156	0.998617		-0.0745156	0.997143		-0.0745156	0.999066		-0.0745156	0.9984		-0.0745156	0.998195		-0.0745156	0.99685		-0.0745156	0.997469		-0.0745156	0.997124
0	0.997331		0	0.994962		0	0.996088		0	0.993336		0	0.996879		0	0.99546		0	0.995842		0	0.996238		0	0.996968		0	0.9871		0	0.997812		0	0.996601		0	0.995806		0	0.997945		0	0.995981		0	0.996891
0.0745156	0.978673		0.0745156	0.9777		0.0745156	0.978977		0.0745156	0.975878		0.0745156	0.978053		0.0745156	0.976895		0.0745156	0.981978		0.0745156	0.9796		0.0745156	0.979077		0.0745156	0.976838		0.0745156	0.981321		0.0745156	0.979039		0.0745156	0.979019		0.0745156	0.978728		0.0745156	0.979088		0.0745156	0.980294
0.149031	0.969116		0.149031	0.968681		0.149031	0.968848		0.149031	0.966076		0.149031	0.96817		0.149031	0.966149		0.149031	0.969509		0.149031	0.969614		0.149031	0.968921		0.149031	0.969951		0.149031	0.971761		0.149031	0.96929		0.149031	0.969773		0.149031	0.969636		0.149031	0.969989		0.149031	0.971699
0.223547	0.961317		0.223547	0.961652		0.223547	0.96341		0.223547	0.959232		0.223547	0.961884		0.223547	0.960927		0.223547	0.962573		0.223547	0.964034		0.223547	0.963524		0.223547	0.964618		0.223547	0.96553		0.223547	0.964454		0.223547	0.964268		0.223547	0.964864		0.223547	0.964063		0.223547	0.966901
0.298062	0.957337		0.298062	0.95765		0.298062	0.959085		0.298062	0.954612		0.298062	0.956174		0.298062	0.955054		0.298062	0.957019		0.298062	0.959663		0.298062	0.95914		0.298062	0.962305		0.298062	0.961781		0.298062	0.960053		0.298062	0.960941		0.298062	0.960121		0.298062	0.959815		0.298062	0.961874
0.372578	0.954319		0.372578	0.953168		0.372578	0.955669		0.372578	0.951121		0.372578	0.952412		0.372578	0.950718		0.372578	0.953716		0.372578	0.957748		0.372578	0.955719		0.372578	0.95876		0.372578	0.958585		0.372578	0.956115		0.372578	0.957953		0.372578	0.956201		0.372578	0.956096		0.372578	0.959337
0.447093	0.952446		0.447093	0.950567		0.447093	0.95118		0.447093	0.946862		0.447093	0.949352		0.447093	0.948315		0.447093	0.950176		0.447093	0.954384		0.447093	0.952595		0.447093	0.956253		0.447093	0.95479		0.447093	0.953972		0.447093	0.954009		0.447093	0.953399		0.447093	0.95289		0.447093	0.955771
0.521609	0.948536		0.521609	0.947071		0.521609	0.948184		0.521609	0.944061		0.521609	0.945948		0.521609	0.945396		0.521609	0.947667		0.521609	0.951564		0.521609	0.949113		0.521609	0.9564		0.521609	0.95254		0.521609	0.952263		0.521609	0.951626		0.521609	0.950356		0.521609	0.950692		0.521609	0.952384
0.596125	0.948388		0.596125	0.944855		0.596125	0.945558		0.596125	0.940129		0.596125	0.942898		0.596125	0.943192		0.596125	0.945079		0.596125	0.951249		0.596125	0.947322		0.596125	0.953278		0.596125	0.949616		0.596125	0.949558		0.596125	0.94931		0.596125	0.946757		0.596125	0.947401		0.596125	0.950453
0.67064	0.944704		0.67064	0.942813		0.67064	0.943418		0.67064	0.939736		0.67064	0.940453		0.67064	0.941874		0.67064	0.94213		0.67064	0.948163		0.67064	0.945066		0.67064	0.95135		0.67064	0.947321		0.67064	0.946261		0.67064	0.948084		0.67064	0.944423		0.67064	0.945898		0.67064	0.948622
0.745156	0.943924		0.745156	0.939205		0.745156	0.940295		0.745156	0.936687		0.745156	0.937598		0.745156	0.939653		0.745156	0.938928		0.745156	0.945356		0.745156	0.942968		0.745156	0.94945		0.745156	0.946281		0.745156	0.944904		0.745156	0.945098		0.745156	0.943395		0.745156	0.944715		0.745156	0.94683
0.819672	0.940745		0.819672	0.937009		0.819672	0.939578		0.819672	0.933962		0.819672	0.935807		0.819672	0.936552		0.819672	0.93741		0.819672	0.943169		0.819672	0.940322		0.819672	0.947645		0.819672	0.943834		0.819672	0.942419		0.819672	0.943734		0.819672	0.940203		0.819672	0.942528		0.819672	0.944676
0.894187	0.939176		0.894187	0.934241		0.894187	0.937012		0.894187	0.931522		0.894187	0.933684		0.894187	0.933229		0.894187	0.936743		0.894187	0.941747		0.894187	0.939484		0.894187	0.947253		0.894187	0.942444		0.894187	0.940323		0.894187	0.942115		0.894187	0.937468		0.894187	0.940793		0.894187	0.943017
0.968703	0.936983		0.968703	0.932146		0.968703	0.935104		0.968703	0.931449		0.968703	0.931527		0.968703	0.933993		0.968703	0.934879		0.968703	0.941463		0.968703	0.93809		0.968703	0.945731		0.968703	0.941287		0.968703	0.938187		0.968703	0.939995		0.968703	0.936114		0.968703	0.93826		0.968703	0.940666
1.04322	0.936125		1.04322	0.931438		1.04322	0.934031		1.04322	0.929517		1.04322	0.929917		1.04322	0.932857		1.04322	0.933499		1.04322	0.939406		1.04322	0.936662		1.04322	0.945828		1.04322	0.938252		1.04322	0.9376		1.04322	0.937806		1.04322	0.933737		1.04322	0.937207		1.04322	0.939415
1.11773	0.93518		1.11773	0.928967		1.11773	0.933699		1.11773	0.926743		1.11773	0.928387		1.11773	0.929132		1.11773	0.931818		1.11773	0.938087		1.11773	0.933923		1.11773	0.943095		1.11773	0.938171		1.11773	0.935874		1.11773	0.938277		1.11773	0.932169		1.11773	0.936871		1.11773	0.938143
1.19225	0.934248		1.19225	0.927693		1.19225	0.931273		1.19225	0.925675		1.19225	0.926253		1.19225	0.930298		1.19225	0.930469		1.19225	0.937487		1.19225	0.932249		1.19225	0.941328		1.19225	0.936862		1.19225	0.934471		1.19225	0.935894		1.19225	0.930937		1.19225	0.934266		1.19225	0.935967
1.26677	0.931369		1.26677	0.926671		1.26677	0.931429		1.26677	0.922928		1.26677	0.924928		1.26677	0.926878		1.26677	0.929765		1.26677	0.935877		1.26677	0.931143		1.26677	0.940519		1.26677	0.935397		1.26677	0.934311		1.26677	0.935583		1.26677	0.92857		1.26677	0.932282		1.26677	0.935509
1.34128	0.93134		1.34128	0.9245		1.34128	0.93117		1.34128	0.921678		1.34128	0.923578		1.34128	0.925235		1.34128	0.928593		1.34128	0.935045		1.34128	0.930205		1.34128	0.940705		1.34128	0.934104		1.34128	0.930973		1.34128	0.934204		1.34128	0.92624		1.34128	0.931869		1.34128	0.933741
1.4158	0.929085		1.4158	0.922878		1.4158	0.92856		1.4158	0.920864		1.4158	0.921923		1.4158	0.925338		1.4158	0.926968		1.4158	0.933561		1.4158	0.92835		1.4158	0.939667		1.4158	0.931607		1.4158	0.931622		1.4158	0.932802		1.4158	0.924509		1.4158	0.930261		1.4158	0.933116
1.49031	0.930252		1.49031	0.922676		1.49031	0.926558		1.49031	0.919516		1.49031	0.921181		1.49031	0.92222		1.49031	0.925963		1.49031	0.933987		1.49031	0.927782		1.49031	0.939876		1.49031	0.931612		1.49031	0.928685		1.49031	0.932558		1.49031	0.92376		1.49031	0.930636		1.49031	0.932129
1.56483	0.926354		1.56483	0.921292		1.56483	0.926401		1.56483	0.918733		1.56483	0.919629		1.56483	0.923339		1.56483	0.926453		1.56483	0.931696		1.56483	0.927266		1.56483	0.938675		1.56483	0.930578		1.56483	0.928862		1.56483	0.932604		1.56483	0.921936		1.56483	0.927748		1.56483	0.931634
1.63934	0.925295		1.63934	0.92026		1.63934	0.923815		1.63934	0.916818		1.63934	0.919596		1.63934	0.922928		1.63934	0.923454		1.63934	0.931966		1.63934	0.926637		1.63934	0.938112		1.63934	0.929424		1.63934	0.928385		1.63934	0.930549		1.63934	0.920719		1.63934	0.928051		1.63934	0.929415
1.71386	0.924798		1.71386	0.917537		1.71386	0.923827		1.71386	0.915993		1.71386	0.917214		1.71386	0.920929		1.71386	0.923755		1.71386	0.931115		1.71386	0.924883		1.71386	0.936844		1.71386	0.928622		1.71386	0.926836		1.71386	0.927501		1.71386	0.919292		1.71386	0.926788		1.71386	0.928828
1.78837	0.92396		1.78837	0.918053		1.78837	0.924933		1.78837	0.915642		1.78837	0.917227		1.78837	0.920122		1.78837	0.922358		1.78837	0.930151		1.78837	0.924754		1.78837	0.936651		1.78837	0.926713		1.78837	0.925221		1.78837	0.926529		1.78837	0.917799		1.78837	0.926268		1.78837	0.927258
1.86289	0.922457		1.86289	0.915759		1.86289	0.922473		1.86289	0.914474		1.86289	0.916238		1.86289	0.91909		1.86289	0.921649		1.86289	0.93017		1.86289	0.923438		1.86289	0.935556		1.86289	0.928047		1.86289	0.924443		1.86289	0.926256		1.86289	0.916332		1.86289	0.925674		1.86289	0.926795
1.93741	0.920703		1.93741	0.915179		1.93741	0.922323		1.93741	0.913126		1.93741	0.915712		1.93741	0.918798		1.93741	0.921364		1.93741	0.928494		1.93741	0.923699		1.93741	0.936468		1.93741	0.926474		1.93741	0.923914		1.93741	0.926995		1.93741	0.914408		1.93741	0.924721		1.93741	0.924516
2.01192	0.919931		2.01192	0.913878		2.01192	0.921602		2.01192	0.912252		2.01192	0.914209		2.01192	0.91652		2.01192	0.920364		2.01192	0.928859		2.01192	0.923314		2.01192	0.936102		2.01192	0.926308		2.01192	0.923385		2.01192	0.925647		2.01192	0.914463		2.01192	0.924568		2.01192	0.924306
2.08644	0.920711		2.08644	0.913588		2.08644	0.920209		2.08644	0.911199		2.08644	0.914332		2.08644	0.915893		2.08644	0.920187		2.08644	0.927958		2.08644	0.920599		2.08644	0.935043		2.08644	0.924799		2.08644	0.922481		2.08644	0.925818		2.08644	0.912221		2.08644	0.923456		2.08644	0.924225
2.16095	0.919984		2.16095	0.912386		2.16095	0.91976		2.16095	0.910806		2.16095	0.91344		2.16095	0.916032		2.16095	0.920449		2.16095	0.927944		2.16095	0.920633		2.16095	0.934304		2.16095	0.925498		2.16095	0.923115		2.16095	0.925037		2.16095	0.911896		2.16095	0.923353		2.16095	0.922028
2.23547	0.916473		2.23547	0.911342		2.23547	0.919775		2.23547	0.90964		2.23547	0.912311		2.23547	0.915787		2.23547	0.919137		2.23547	0.927498		2.23547	0.9193		2.23547	0.933425		2.23547	0.92431		2.23547	0.921625		2.23547	0.924183		2.23547	0.910097		2.23547	0.922654		2.23547	0.921721
2.30998	0.917463		2.30998	0.91003		2.30998	0.918645		2.30998	0.909679		2.30998	0.911785		2.30998	0.913074		2.30998	0.919562		2.30998	0.92693		2.30998	0.92028		2.30998	0.935506		2.30998	0.923592		2.30998	0.920547		2.30998	0.922968		2.30998	0.90943		2.30998	0.92284		2.30998	0.921183
2.3845	0.917249		2.3845	0.91062		2.3845	0.918135		2.3845	0.90747		2.3845	0.912809		2.3845	0.914103		2.3845	0.91899		2.3845	0.92661		2.3845	0.919556		2.3845	0.93497		2.3845	0.923067		2.3845	0.920872		2.3845	0.923509		2.3845	0.909755		2.3845	0.920677		2.3845	0.919826
2.45901	0.916493		2.45901	0.908857		2.45901	0.917364		2.45901	0.907802		2.45901	0.911319		2.45901	0.913071		2.45901	0.919435		2.45901	0.926397		2.45901	0.918859		2.45901	0.934627		2.45901	0.921996		2.45901	0.921081		2.45901	0.922696		2.45901	0.907268		2.45901	0.920781		2.45901	0.917945
2.53353	0.916645		2.53353	0.907722		2.53353	0.917765		2.53353	0.906402		2.53353	0.911271		2.53353	0.912812		2.53353	0.918112		2.53353	0.926727		2.53353	0.918179		2.53353	0.933562		2.53353	0.920817		2.53353	0.920423		2.53353	0.922012		2.53353	0.906666		2.53353	0.920172		2.53353	0.918748
2.60805	0.916613		2.60805	0.906849		2.60805	0.91573		2.60805	0.906505		2.60805	0.910588		2.60805	0.912414		2.60805	0.918275		2.60805	0.925347		2.60805	0.917841		2.60805	0.933492		2.60805	0.920737		2.60805	0.92078		2.60805	0.921918		2.60805	0.905245		2.60805	0.920825		2.60805	0.916904
2.68256	0.915927		2.68256	0.906964		2.68256	0.916815		2.68256	0.906174		2.68256	0.910941		2.68256	0.912118		2.68256	0.917791		2.68256	0.925471		2.68256	0.917332		2.68256	0.931528		2.68256	0.921209		2.68256	0.921279		2.68256	0.922135		2.68256	0.904557		2.68256	0.920283		2.68256	0.916928
2.75708	0.914333		2.75708	0.90682		2.75708	0.915609		2.75708	0.905602		2.75708	0.910337		2.75708	0.910614		2.75708	0.91794		2.75708	0.925097		2.75708	0.916817		2.75708	0.932943		2.75708	0.919802		2.75708	0.921126		2.75708	0.922779		2.75708	0.902832		2.75708	0.919512		2.75708	0.915918
2.83159	0.915454		2.83159	0.906191		2.83159	0.916893		2.83159	0.905555		2.83159	0.908707		2.83159	0.910654		2.83159	0.918937		2.83159	0.925324		2.83159	0.916761		2.83159	0.931302		2.83159	0.919807		2.83159	0.919796		2.83159	0.922003		2.83159	0.902345		2.83159	0.918769		2.83159	0.915467
2.90611	0.915109		2.90611	0.905608		2.90611	0.915504		2.90611	0.905199		2.90611	0.909688		2.90611	0.910026		2.90611	0.917653		2.90611	0.924981		2.90611	0.916942		2.90611	0.931941		2.90611	0.920798		2.90611	0.920964		2.90611	0.922049		2.90611	0.902223		2.90611	0.919768		2.90611	0.914202
2.98062	0.914719		2.98062	0.903773		2.98062	0.915018		2.98062	0.903655		2.98062	0.908734		2.98062	0.909864		2.98062	0.918593		2.98062	0.923888		2.98062	0.916157		2.98062	0.932553		2.98062	0.919183		2.98062	0.92177		2.98062	0.922361		2.98062	0.900366		2.98062	0.918935		2.98062	0.914856
3.05514	0.915093		3.05514	0.904231		3.05514	0.915308		3.05514	0.904875		3.05514	0.910089		3.05514	0.910332		3.05514	0.918655		3.05514	0.925686		3.05514	0.916934		3.05514	0.931455		3.05514	0.918584		3.05514	0.921823		3.05514	0.921193		3.05514	0.899203		3.05514	0.919164		3.05514	0.913407
3.12966	0.913972		3.12966	0.903718		3.12966	0.914379		3.12966	0.903987		3.12966	0.909007		3.12966	0.90928		3.12966	0.919967		3.12966	0.925866		3.12966	0.916981		3.12966	0.929304		3.12966	0.919616		3.12966	0.921131		3.12966	0.92104		3.12966	0.898217		3.12966	0.919357		3.12966	0.912392
3.20417	0.915031		3.20417	0.902314		3.20417	0.915094		3.20417	0.903739		3.20417	0.908451		3.20417	0.909067		3.20417	0.919731		3.20417	0.923349		3.20417	0.917095		3.20417	0.930213		3.20417	0.919155		3.20417	0.921942		3.20417	0.920207		3.20417	0.897826		3.20417	0.919966		3.20417	0.911707
3.27869	0.914411		3.27869	0.902842		3.27869	0.914575		3.27869	0.904097		3.27869	0.908146		3.27869	0.909625		3.27869	0.920553		3.27869	0.923846		3.27869	0.916847		3.27869	0.931255		3.27869	0.918257		3.27869	0.9217		3.27869	0.92107		3.27869	0.896366		3.27869	0.920395		3.27869	0.91191
3.3532	0.914883		3.3532	0.901623		3.3532	0.914994		3.3532	0.903565		3.3532	0.909473		3.3532	0.908028		3.3532	0.920274		3.3532	0.924373		3.3532	0.916771		3.3532	0.929607		3.3532	0.91882		3.3532	0.923594		3.3532	0.919816		3.3532	0.896706		3.3532	0.920504		3.3532	0.910789
3.42772	0.914879		3.42772	0.902077		3.42772	0.914153		3.42772	0.903965		3.42772	0.909145		3.42772	0.908187		3.42772	0.920457		3.42772	0.923752		3.42772	0.916542		3.42772	0.929944		3.42772	0.917943		3.42772	0.923647		3.42772	0.920985		3.42772	0.896555		3.42772	0.920698		3.42772	0.909241
3.50223	0.912809		3.50223	0.90145		3.50223	0.912803		3.50223	0.903854		3.50223	0.908146		3.50223	0.908639		3.50223	0.921139		3.50223	0.924471		3.50223	0.915943		3.50223	0.929577		3.50223	0.918792		3.50223	0.923317		3.50223	0.921941		3.50223	0.894893		3.50223	0.919634		3.50223	0.909659
3.57675	0.913479		3.57675	0.901352		3.57675	0.91362		3.57675	0.901971		3.57675	0.90917		3.57675	0.908645		3.57675	0.921846		3.57675	0.92412		3.57675	0.917029		3.57675	0.92992		3.57675	0.917655		3.57675	0.923624		3.57675	0.920583		3.57675	0.893253		3.57675	0.920696		3.57675	0.909125
3.65126	0.913861		3.65126	0.899351		3.65126	0.912369		3.65126	0.903511		3.65126	0.909839		3.65126	0.90758		3.65126	0.922237		3.65126	0.924467		3.65126	0.916632		3.65126	0.929704		3.65126	0.918409		3.65126	0.925456		3.65126	0.920867		3.65126	0.893465		3.65126	0.920781		3.65126	0.908531
3.72578	0.914169		3.72578	0.899939		3.72578	0.913273		3.72578	0.904539		3.72578	0.911093		3.72578	0.907653		3.72578	0.923189		3.72578	0.923907		3.72578	0.916683		3.72578	0.929205		3.72578	0.917996		3.72578	0.925236		3.72578	0.920433		3.72578	0.893499		3.72578	0.920441		3.72578	0.908809
3.8003	0.912575		3.8003	0.900397		3.8003	0.913469		3.8003	0.904161		3.8003	0.910209		3.8003	0.907517		3.8003	0.922291		3.8003	0.924501		3.8003	0.915887		3.8003	0.928732		3.8003	0.917965		3.8003	0.926204		3.8003	0.920414		3.8003	0.892357		3.8003	0.921527		3.8003	0.907844
3.87481	0.913746		3.87481	0.900508		3.87481	0.913246		3.87481	0.90393		3.87481	0.909255		3.87481	0.907563		3.87481	0.922795		3.87481	0.924195		3.87481	0.915151		3.87481	0.930463		3.87481	0.918012		3.87481	0.927914		3.87481	0.920479		3.87481	0.891581		3.87481	0.922012		3.87481	0.906104
3.94933	0.913614		3.94933	0.900167		3.94933	0.91267		3.94933	0.904586		3.94933	0.911194		3.94933	0.907221		3.94933	0.924648		3.94933	0.924643		3.94933	0.916415		3.94933	0.930183		3.94933	0.91784		3.94933	0.928248		3.94933	0.920142		3.94933	0.890974		3.94933	0.921509		3.94933	0.906399
4.02384	0.91359		4.02384	0.900004		4.02384	0.913101		4.02384	0.903709		4.02384	0.911717		4.02384	0.908865		4.02384	0.924293		4.02384	0.924768		4.02384	0.917068		4.02384	0.930869		4.02384	0.91753		4.02384	0.928924		4.02384	0.919546		4.02384	0.891954		4.02384	0.921428		4.02384	0.905536
4.09836	0.913454		4.09836	0.898842		4.09836	0.913635		4.09836	0.903584		4.09836	0.912356		4.09836	0.907251		4.09836	0.925684		4.09836	0.925573		4.09836	0.916011		4.09836	0.93035		4.09836	0.918481		4.09836	0.930049		4.09836	0.920045		4.09836	0.89101		4.09836	0.922093		4.09836	0.90576
4.17287	0.912165		4.17287	0.899821		4.17287	0.915263		4.17287	0.904893		4.17287	0.913413		4.17287	0.906976		4.17287	0.926884		4.17287	0.924781		4.17287	0.916228		4.17287	0.931545		4.17287	0.918029		4.17287	0.93089		4.17287	0.920394		4.17287	0.889505		4.17287	0.922796		4.17287	0.905245
4.24739	0.91306		4.24739	0.89939		4.24739	0.91443		4.24739	0.903805		4.24739	0.912759		4.24739	0.907603		4.24739	0.926971		4.24739	0.925305		4.24739	0.916847		4.24739	0.930476		4.24739	0.92006		4.24739	0.92998		4.24739	0.919405		4.24739	0.888769		4.24739	0.924378		4.24739	0.904259
4.3219	0.912091		4.3219	0.898665		4.3219	0.912818		4.3219	0.90382		4.3219	0.913047		4.3219	0.907945		4.3219	0.927543		4.3219	0.925997		4.3219	0.918694		4.3219	0.930939		4.3219	0.91877		4.3219	0.932512		4.3219	0.919729		4.3219	0.889801		4.3219	0.923624		4.3219	0.905236
4.39642	0.913204		4.39642	0.899644		4.39642	0.914144		4.39642	0.904726		4.39642	0.913888		4.39642	0.907948		4.39642	0.928788		4.39642	0.925906		4.39642	0.918048		4.39642	0.931751		4.39642	0.918989		4.39642	0.93227		4.39642	0.920546		4.39642	0.888762		4.39642	0.924876		4.39642	0.904901
4.47094	0.913467		4.47094	0.900843		4.47094	0.913816		4.47094	0.905295		4.47094	0.914392		4.47094	0.907666		4.47094	0.929959		4.47094	0.925211		4.47094	0.916652		4.47094	0.931831		4.47094	0.918856		4.47094	0.934371		4.47094	0.919791		4.47094	0.890221		4.47094	0.925091		4.47094	0.904601
4.54545	0.913195		4.54545	0.89991		4.54545	0.914232		4.54545	0.90478		4.54545	0.915113		4.54545	0.907905		4.54545	0.929373		4.54545	0.925272		4.54545	0.917059		4.54545	0.931981		4.54545	0.918384		4.54545	0.935826		4.54545	0.920687		4.54545	0.889514		4.54545	0.926629		4.54545	0.90217
4.61997	0.91421		4.61997	0.89956		4.61997	0.914569		4.61997	0.905229		4.61997	0.915153		4.61997	0.909333		4.61997	0.929627		4.61997	0.926286		4.61997	0.918569		4.61997	0.932187		4.61997	0.918967		4.61997	0.937084		4.61997	0.919923		4.61997	0.88994		4.61997	0.927138		4.61997	0.903109
4.69448	0.914128		4.69448	0.899334		4.69448	0.913071		4.69448	0.906056		4.69448	0.916846		4.69448	0.908655		4.69448	0.930511		4.69448	0.926905		4.69448	0.918194		4.69448	0.931987		4.69448	0.919111		4.69448	0.938187		4.69448	0.92101		4.69448	0.889113		4.69448	0.927392		4.69448	0.903773
4.769	0.913951		4.769	0.898775		4.769	0.91478		4.769	0.907485		4.769	0.916698		4.769	0.909233		4.769	0.931373		4.769	0.925857		4.769	0.918691		4.769	0.93462		4.769	0.918859		4.769	0.939791		4.769	0.920486		4.769	0.889944		4.769	0.928644		4.769	0.902791
4.84351	0.913906		4.84351	0.900222		4.84351	0.915278		4.84351	0.906724		4.84351	0.917718		4.84351	0.908509		4.84351	0.93322		4.84351	0.926545		4.84351	0.919032		4.84351	0.93235		4.84351	0.918609		4.84351	0.938903		4.84351	0.920541		4.84351	0.890699		4.84351	0.927938		4.84351	0.902347
4.91803	0.915619		4.91803	0.900289		4.91803	0.914901		4.91803	0.906886		4.91803	0.918026		4.91803	0.909708		4.91803	0.933752		4.91803	0.927091		4.91803	0.919057		4.91803	0.933578		4.91803	0.919652		4.91803	0.939125		4.91803	0.920641		4.91803	0.889501		4.91803	0.92964		4.91803	0.901519
4.99255	0.916875		4.99255	0.90057		4.99255	0.91381		4.99255	0.907654		4.99255	0.919346		4.99255	0.908685		4.99255	0.93413		4.99255	0.926838		4.99255	0.919434		4.99255	0.934877		4.99255	0.919738		4.99255	0.941915		4.99255	0.921918		4.99255	0.891138		4.99255	0.928764		4.99255	0.902553
5.06706	0.91635		5.06706	0.899562		5.06706	0.916122		5.06706	0.90778		5.06706	0.918785		5.06706	0.909157		5.06706	0.934684		5.06706	0.926888		5.06706	0.919987		5.06706	0.935586		5.06706	0.920249		5.06706	0.942404		5.06706	0.920384		5.06706	0.891029		5.06706	0.93006		5.06706	0.902003
5.14158	0.914522		5.14158	0.901458		5.14158	0.914834		5.14158	0.909051		5.14158	0.920538		5.14158	0.910216		5.14158	0.936		5.14158	0.928592		5.14158	0.92068		5.14158	0.934604		5.14158	0.91958		5.14158	0.943908		5.14158	0.920816		5.14158	0.891879		5.14158	0.930973		5.14158	0.901269
5.21609	0.916773		5.21609	0.900222		5.21609	0.914985		5.21609	0.909454		5.21609	0.919872		5.21609	0.90909		5.21609	0.935574		5.21609	0.928544		5.21609	0.920894		5.21609	0.937436		5.21609	0.920393		5.21609	0.94541		5.21609	0.921701		5.21609	0.893151		5.21609	0.932199		5.21609	0.900839
5.29061	0.915315		5.29061	0.899936		5.29061	0.916568		5.29061	0.91045		5.29061	0.920886		5.29061	0.908426		5.29061	0.937318		5.29061	0.929495		5.29061	0.922475		5.29061	0.937044		5.29061	0.919561		5.29061	0.948692		5.29061	0.921703		5.29061	0.893658		5.29061	0.9328		5.29061	0.902014
5.36512	0.916994		5.36512	0.900615		5.36512	0.916502		5.36512	0.910566		5.36512	0.921176		5.36512	0.909329		5.36512	0.937312		5.36512	0.930011		5.36512	0.922558		5.36512	0.939507		5.36512	0.919522		5.36512	0.949198		5.36512	0.921301		5.36512	0.893516		5.36512	0.933195		5.36512	0.902104
5.43964	0.917389		5.43964	0.901342		5.43964	0.916185		5.43964	0.91128		5.43964	0.921116		5.43964	0.910355		5.43964	0.938196		5.43964	0.930053		5.43964	0.923289		5.43964	0.937799		5.43964	0.919841		5.43964	0.950561		5.43964	0.920548		5.43964	0.893948		5.43964	0.933392		5.43964	0.900381
5.51415	0.916801		5.51415	0.901769		5.51415	0.916272		5.51415	0.912252		5.51415	0.92177		5.51415	0.910312		5.51415	0.938695		5.51415	0.93064		5.51415	0.923694		5.51415	0.938265		5.51415	0.920204		5.51415	0.952569		5.51415	0.922068		5.51415	0.894962		5.51415	0.934299		5.51415	0.901729
5.58867	0.918674		5.58867	0.900786		5.58867	0.91601		5.58867	0.913305		5.58867	0.922198		5.58867	0.90922		5.58867	0.939849		5.58867	0.931573		5.58867	0.92519		5.58867	0.939484		5.58867	0.920698		5.58867	0.954136		5.58867	0.92177		5.58867	0.895635		5.58867	0.934517		5.58867	0.901436
5.66319	0.918925		5.66319	0.902146		5.66319	0.91749		5.66319	0.91398		5.66319	0.924785		5.66319	0.90915		5.66319	0.939841		5.66319	0.932118		5.66319	0.926518		5.66319	0.939533		5.66319	0.920498		5.66319	0.95625		5.66319	0.921927		5.66319	0.896242		5.66319	0.93446		5.66319	0.899982
5.7377	0.920005		5.7377	0.901261		5.7377	0.918054		5.7377	0.914196		5.7377	0.924407		5.7377	0.910392		5.7377	0.93992		5.7377	0.932593		5.7377	0.925585		5.7377	0.93991		5.7377	0.920962		5.7377	0.957667		5.7377	0.92243		5.7377	0.896697		5.7377	0.936346		5.7377	0.900199
5.81222	0.919906		5.81222	0.901901		5.81222	0.918163		5.81222	0.915296		5.81222	0.925269		5.81222	0.91004		5.81222	0.941088		5.81222	0.934157		5.81222	0.926991		5.81222	0.940239		5.81222	0.919996		5.81222	0.958606		5.81222	0.922051		5.81222	0.897736		5.81222	0.936663		5.81222	0.899869
5.88673	0.920962		5.88673	0.903319		5.88673	0.917095		5.88673	0.916258		5.88673	0.926877		5.88673	0.911258		5.88673	0.943637		5.88673	0.934959		5.88673	0.927951		5.88673	0.941953		5.88673	0.919838		5.88673	0.959886		5.88673	0.923472		5.88673	0.898748		5.88673	0.937782		5.88673	0.899643
5.96125	0.920531		5.96125	0.904598		5.96125	0.917949		5.96125	0.916506		5.96125	0.927432		5.96125	0.911534		5.96125	0.943172		5.96125	0.937211		5.96125	0.928026		5.96125	0.940689		5.96125	0.920767		5.96125	0.961575		5.96125	0.923176		5.96125	0.899386		5.96125	0.937974		5.96125	0.90032
6.03576	0.920707		6.03576	0.903103		6.03576	0.9186		6.03576	0.916388		6.03576	0.927235		6.03576	0.913061		6.03576	0.943372		6.03576	0.937154		6.03576	0.928996		6.03576	0.942246		6.03576	0.921586		6.03576	0.963816		6.03576	0.922767		6.03576	0.900989		6.03576	0.939198		6.03576	0.899357
6.11028	0.92343		6.11028	0.904802		6.11028	0.918856		6.11028	0.918374		6.11028	0.927598		6.11028	0.911833		6.11028	0.945704		6.11028	0.937901		6.11028	0.930248		6.11028	0.943112		6.11028	0.920859		6.11028	0.964701		6.11028	0.922927		6.11028	0.900737		6.11028	0.938201		6.11028	0.899789
6.18479	0.923336		6.18479	0.905951		6.18479	0.91979		6.18479	0.918443		6.18479	0.929366		6.18479	0.913536		6.18479	0.945952		6.18479	0.939151		6.18479	0.930887		6.18479	0.943791		6.18479	0.920285		6.18479	0.965655		6.18479	0.924307		6.18479	0.902078		6.18479	0.93922		6.18479	0.899794
6.25931	0.924847		6.25931	0.905426		6.25931	0.920556		6.25931	0.919894		6.25931	0.929794		6.25931	0.913834		6.25931	0.945673		6.25931	0.940338		6.25931	0.929846		6.25931	0.944144		6.25931	0.921894		6.25931	0.968		6.25931	0.922181		6.25931	0.901602		6.25931	0.939735		6.25931	0.900775
6.33383	0.92474		6.33383	0.905815		6.33383	0.919658		6.33383	0.919531		6.33383	0.931956		6.33383	0.914781		6.33383	0.948005		6.33383	0.941072		6.33383	0.930901		6.33383	0.944683		6.33383	0.921031		6.33383	0.968734		6.33383	0.924982		6.33383	0.902855		6.33383	0.940872		6.33383	0.899803
6.40834	0.925771		6.40834	0.90621		6.40834	0.920577		6.40834	0.920235		6.40834	0.93168		6.40834	0.916334		6.40834	0.948467		6.40834	0.943163		6.40834	0.932307		6.40834	0.945216		6.40834	0.921899		6.40834	0.970541		6.40834	0.924222		6.40834	0.904979		6.40834	0.94057		6.40834	0.900195
6.48286	0.926149		6.48286	0.9074		6.48286	0.921183		6.48286	0.921686		6.48286	0.931923		6.48286	0.915909		6.48286	0.949872		6.48286	0.944183		6.48286	0.934167		6.48286	0.947336		6.48286	0.922321		6.48286	0.971269		6.48286	0.925661		6.48286	0.906164		6.48286	0.94047		6.48286	0.90044
6.55737	0.927106		6.55737	0.907292		6.55737	0.920683		6.55737	0.922469		6.55737	0.934951		6.55737	0.91645		6.55737	0.950308		6.55737	0.945059		6.55737	0.934566		6.55737	0.947213		6.55737	0.922191		6.55737	0.972182		6.55737	0.925762		6.55737	0.90714		6.55737	0.94135		6.55737	0.901578
6.63189	0.928864		6.63189	0.908029		6.63189	0.920224		6.63189	0.922393		6.63189	0.934365		6.63189	0.916716		6.63189	0.950767		6.63189	0.947415		6.63189	0.935797		6.63189	0.948414		6.63189	0.922726		6.63189	0.975341		6.63189	0.926189		6.63189	0.906523		6.63189	0.942257		6.63189	0.900454
6.7064	0.928798		6.7064	0.909565		6.7064	0.920951		6.7064	0.922712		6.7064	0.93591		6.7064	0.91823		6.7064	0.951902		6.7064	0.947151		6.7064	0.936257		6.7064	0.948967		6.7064	0.922898		6.7064	0.97633		6.7064	0.925838		6.7064	0.907545		6.7064	0.943699		6.7064	0.901092
6.78092	0.930363		6.78092	0.910013		6.78092	0.922295		6.78092	0.922729		6.78092	0.936659		6.78092	0.917805		6.78092	0.953403		6.78092	0.949148		6.78092	0.938231		6.78092	0.950814		6.78092	0.92292		6.78092	0.977952		6.78092	0.926725		6.78092	0.908884		6.78092	0.944012		6.78092	0.901231
6.85544	0.930749		6.85544	0.909658		6.85544	0.922024		6.85544	0.923029		6.85544	0.937633		6.85544	0.918144		6.85544	0.954746		6.85544	0.949672		6.85544	0.938823		6.85544	0.950455		6.85544	0.923248		6.85544	0.978403		6.85544	0.928249		6.85544	0.909327		6.85544	0.943273		6.85544	0.900351
6.92995	0.932671		6.92995	0.910032		6.92995	0.923305		6.92995	0.924651		6.92995	0.939314		6.92995	0.91978		6.92995	0.955039		6.92995	0.951194		6.92995	0.940022		6.92995	0.949599		6.92995	0.923683		6.92995	0.981163		6.92995	0.927335		6.92995	0.909545		6.92995	0.944943		6.92995	0.90065
7.00447	0.933582		7.00447	0.91121		7.00447	0.923085		7.00447	0.925493		7.00447	0.940922		7.00447	0.921042		7.00447	0.955774		7.00447	0.953118		7.00447	0.941123		7.00447	0.952029		7.00447	0.925428		7.00447	0.981849		7.00447	0.927697		7.00447	0.911069		7.00447	0.945476		7.00447	0.901582
7.07898	0.934572		7.07898	0.912391		7.07898	0.924478		7.07898	0.926281		7.07898	0.940553		7.07898	0.921181		7.07898	0.95716		7.07898	0.95483		7.07898	0.941825		7.07898	0.950718		7.07898	0.924335		7.07898	0.98395		7.07898	0.928993		7.07898	0.911115		7.07898	0.947287		7.07898	0.901691
7.1535	0.935221		7.1535	0.913936		7.1535	0.925355		7.1535	0.926713		7.1535	0.941976		7.1535	0.921815		7.1535	0.957889		7.1535	0.956408		7.1535	0.94327		7.1535	0.953451		7.1535	0.924616		7.1535	0.985348		7.1535	0.929408		7.1535	0.91292		7.1535	0.946824		7.1535	0.900844
7.22801	0.937718		7.22801	0.913319		7.22801	0.925114		7.22801	0.927968		7.22801	0.943341		7.22801	0.923422		7.22801	0.960148		7.22801	0.957062		7.22801	0.943843		7.22801	0.952921		7.22801	0.925953		7.22801	0.988202		7.22801	0.92929		7.22801	0.913212		7.22801	0.948445		7.22801	0.900839
7.30253	0.936605		7.30253	0.914848		7.30253	0.926148		7.30253	0.927597		7.30253	0.945122		7.30253	0.92319		7.30253	0.96006		7.30253	0.958601		7.30253	0.945527		7.30253	0.953634		7.30253	0.92431		7.30253	0.989802		7.30253	0.930879		7.30253	0.913187		7.30253	0.948692		7.30253	0.902201
7.37704	0.938593		7.37704	0.914665		7.37704	0.924755		7.37704	0.929274		7.37704	0.944753		7.37704	0.92404		7.37704	0.960494		7.37704	0.960301		7.37704	0.945339		7.37704	0.953957		7.37704	0.925817		7.37704	0.99334		7.37704	0.930803		7.37704	0.913608		7.37704	0.949197		7.37704	0.900764
7.45156	0.940618		7.45156	0.915968		7.45156	0.926021		7.45156	0.928982		7.45156	0.947684		7.45156	0.92385		7.45156	0.962178		7.45156	0.962471		7.45156	0.946321		7.45156	0.956097		7.45156	0.926874		7.45156	0.994291		7.45156	0.930999		7.45156	0.915111		7.45156	0.950698		7.45156	0.90377
7.52608	0.939763		7.52608	0.918382		7.52608	0.926986		7.52608	0.930378		7.52608	0.947263		7.52608	0.925162		7.52608	0.964178		7.52608	0.964599		7.52608	0.947883		7.52608	0.956523		7.52608	0.926879		7.52608	0.99614		7.52608	0.931803		7.52608	0.915747		7.52608	0.95176		7.52608	0.902746
7.60059	0.942084		7.60059	0.918151		7.60059	0.928059		7.60059	0.932249		7.60059	0.949384		7.60059	0.926974		7.60059	0.963488		7.60059	0.966953		7.60059	0.947946		7.60059	0.956829		7.60059	0.928497		7.60059	0.999231		7.60059	0.932375		7.60059	0.916641		7.60059	0.952883		7.60059	0.902732
7.67511	0.943074		7.67511	0.918254		7.67511	0.927251		7.67511	0.932207		7.67511	0.950236		7.67511	0.927326		7.67511	0.965949		7.67511	0.968951		7.67511	0.948582		7.67511	0.954469		7.67511	0.927837		7.67511	1.0021		7.67511	0.933738		7.67511	0.916836		7.67511	0.95402		7.67511	0.903666
7.74962	0.944647		7.74962	0.919337		7.74962	0.928626		7.74962	0.933638		7.74962	0.950942		7.74962	0.928037		7.74962	0.965076		7.74962	0.969932		7.74962	0.951065		7.74962	0.957621		7.74962	0.927856		7.74962	1.00466		7.74962	0.934389		7.74962	0.916377		7.74962	0.955182		7.74962	0.903395
7.82414	0.946392		7.82414	0.920862		7.82414	0.927899		7.82414	0.934819		7.82414	0.95252		7.82414	0.929839		7.82414	0.96714		7.82414	0.973947		7.82414	0.951501		7.82414	0.957432		7.82414	0.929848		7.82414	1.00628		7.82414	0.933816		7.82414	0.916918		7.82414	0.955449		7.82414	0.902583
7.89865	0.948733		7.89865	0.92146		7.89865	0.929343		7.89865	0.93463		7.89865	0.953476		7.89865	0.929388		7.89865	0.96736		7.89865	0.975225		7.89865	0.953626		7.89865	0.959063		7.89865	0.929662		7.89865	1.00975		7.89865	0.934578		7.89865	0.918494		7.89865	0.957053		7.89865	0.903072
7.97317	0.949427		7.97317	0.922244		7.97317	0.929202		7.97317	0.936589		7.97317	0.954851		7.97317	0.930972		7.97317	0.968703		7.97317	0.977409		7.97317	0.953792		7.97317	0.957855		7.97317	0.929765		7.97317	1.01267		7.97317	0.935183		7.97317	0.91896		7.97317	0.956834		7.97317	0.904115
8.04768	0.950828		8.04768	0.923336		8.04768	0.930447		8.04768	0.935926		8.04768	0.955783		8.04768	0.931327		8.04768	0.969427		8.04768	0.979537		8.04768	0.954903		8.04768	0.959439		8.04768	0.930819		8.04768	1.01594		8.04768	0.93607		8.04768	0.919109		8.04768	0.95933		8.04768	0.904488
8.1222	0.952249		8.1222	0.92419		8.1222	0.930661		8.1222	0.937492		8.1222	0.957559		8.1222	0.931738		8.1222	0.97099		8.1222	0.982629		8.1222	0.956426		8.1222	0.959858		8.1222	0.931321		8.1222	1.01913		8.1222	0.937171		8.1222	0.91977		8.1222	0.959386		8.1222	0.904306
8.19672	0.955477		8.19672	0.925183		8.19672	0.93174		8.19672	0.938884		8.19672	0.95851		8.19672	0.931904		8.19672	0.971221		8.19672	0.985031		8.19672	0.957203		8.19672	0.960468		8.19672	0.931998		8.19672	1.02348		8.19672	0.935781		8.19672	0.920171		8.19672	0.96037		8.19672	0.90433
8.27123	0.95454		8.27123	0.92562		8.27123	0.930775		8.27123	0.939292		8.27123	0.959284		8.27123	0.934517		8.27123	0.972877		8.27123	0.986685		8.27123	0.958385		8.27123	0.962252		8.27123	0.931879		8.27123	1.02635		8.27123	0.937952		8.27123	0.920805		8.27123	0.961539		8.27123	0.9055
8.34575	0.956429		8.34575	0.927184		8.34575	0.932575		8.34575	0.940411		8.34575	0.960925		8.34575	0.936044		8.34575	0.973271		8.34575	0.989154		8.34575	0.959401		8.34575	0.961207		8.34575	0.93189		8.34575	1.03006		8.34575	0.93915		8.34575	0.921632		8.34575	0.962476		8.34575	0.905264
8.42026	0.957715		8.42026	0.928031		8.42026	0.933717		8.42026	0.942166		8.42026	0.962598		8.42026	0.935523		8.42026	0.973902		8.42026	0.991069		8.42026	0.959089		8.42026	0.963796		8.42026	0.932692		8.42026	1.03359		8.42026	0.93997		8.42026	0.921296		8.42026	0.962649		8.42026	0.906263
8.49478	0.960426		8.49478	0.929584		8.49478	0.933672		8.49478	0.942321		8.49478	0.964441		8.49478	0.935985		8.49478	0.975572		8.49478	0.993291		8.49478	0.95992		8.49478	0.965244		8.49478	0.933896		8.49478	1.03602		8.49478	0.939813		8.49478	0.921464		8.49478	0.964183		8.49478	0.905231
8.56929	0.961473		8.56929	0.930287		8.56929	0.934866		8.56929	0.944476		8.56929	0.965205		8.56929	0.937747		8.56929	0.975439		8.56929	0.99442		8.56929	0.960983		8.56929	0.964256		8.56929	0.935902		8.56929	1.03925		8.56929	0.939492		8.56929	0.921355		8.56929	0.965787		8.56929	0.906031
8.64381	0.963789		8.64381	0.931964		8.64381	0.934537		8.64381	0.944859		8.64381	0.967366		8.64381	0.937983		8.64381	0.976295		8.64381	0.997217		8.64381	0.962669		8.64381	0.964978		8.64381	0.935594		8.64381	1.04246		8.64381	0.93985		8.64381	0.922345		8.64381	0.965677		8.64381	0.906591
8.71833	0.965177		8.71833	0.932446		8.71833	0.935405		8.71833	0.945996		8.71833	0.969152		8.71833	0.938481		8.71833	0.976273		8.71833	0.997524		8.71833	0.962876		8.71833	0.965976		8.71833	0.935885		8.71833	1.04387		8.71833	0.9419		8.71833	0.923254		8.71833	0.967338		8.71833	0.90618
8.79284	0.967444		8.79284	0.933602		8.79284	0.93593		8.79284	0.946948		8.79284	0.970594		8.79284	0.940204		8.79284	0.977382		8.79284	0.998898		8.79284	0.96347		8.79284	0.967208		8.79284	0.936751		8.79284	1.04666		8.79284	0.942274		8.79284	0.923063		8.79284	0.968791		8.79284	0.906246
8.86736	0.9676		8.86736	0.93484		8.86736	0.936304		8.86736	0.948981		8.86736	0.972345		8.86736	0.940901		8.86736	0.978512		8.86736	0.999562		8.86736	0.96408		8.86736	0.966879		8.86736	0.937172		8.86736	1.04772		8.86736	0.942695		8.86736	0.922412		8.86736	0.968125		8.86736	0.907358
8.94187	0.968952		8.94187	0.935584		8.94187	0.938504		8.94187	0.94917		8.94187	0.974411		8.94187	0.941585		8.94187	0.980373		8.94187	1.00093		8.94187	0.966129		8.94187	0.968253		8.94187	0.938238		8.94187	1.04946		8.94187	0.943184		8.94187	0.923705		8.94187	0.968359		8.94187	0.907225
9.01639	0.970861		9.01639	0.936611		9.01639	0.938465		9.01639	0.950301		9.01639	0.974584		9.01639	0.942837		9.01639	0.978301		9.01639	1.00317		9.01639	0.965883		9.01639	0.968526		9.01639	0.939533		9.01639	1.05187		9.01639	0.944105		9.01639	0.923825		9.01639	0.971011		9.01639	0.907462
9.0909	0.971555		9.0909	0.937132		9.0909	0.939394		9.0909	0.951315		9.0909	0.977862		9.0909	0.943033		9.0909	0.978323		9.0909	1.00282		9.0909	0.966638		9.0909	0.970647		9.0909	0.939686		9.0909	1.05518		9.0909	0.945883		9.0909	0.925669		9.0909	0.971317		9.0909	0.908493
9.16542	0.973395		9.16542	0.937273		9.16542	0.939092		9.16542	0.952425		9.16542	0.978493		9.16542	0.94543		9.16542	0.98032		9.16542	1.00434		9.16542	0.966838		9.16542	0.970204		9.16542	0.941045		9.16542	1.05553		9.16542	0.945895		9.16542	0.92619		9.16542	0.970778		9.16542	0.907596
9.23993	0.975379		9.23993	0.939675		9.23993	0.941757		9.23993	0.953186		9.23993	0.978959		9.23993	0.944102		9.23993	0.981497		9.23993	1.00717		9.23993	0.967934		9.23993	0.972055		9.23993	0.94228		9.23993	1.05878		9.23993	0.947604		9.23993	0.926335		9.23993	0.971912		9.23993	0.908061
9.31445	0.97666		9.31445	0.940594		9.31445	0.941778		9.31445	0.954322		9.31445	0.980507		9.31445	0.94448		9.31445	0.982536		9.31445	1.00761		9.31445	0.969779		9.31445	0.973223		9.31445	0.942555		9.31445	1.06074		9.31445	0.94707		9.31445	0.927245		9.31445	0.973175		9.31445	0.909309
9.38897	0.977231		9.38897	0.94109		9.38897	0.94261		9.38897	0.954941		9.38897	0.983572		9.38897	0.945795		9.38897	0.982049		9.38897	1.00727		9.38897	0.969903		9.38897	0.972131		9.38897	0.944394		9.38897	1.06181		9.38897	0.947742		9.38897	0.928116		9.38897	0.973653		9.38897	0.910287
9.46348	0.979133		9.46348	0.940416		9.46348	0.942372		9.46348	0.956144		9.46348	0.98381		9.46348	0.946502		9.46348	0.983009		9.46348	1.00846		9.46348	0.9708		9.46348	0.973513		9.46348	0.942466		9.46348	1.06354		9.46348	0.950206		9.46348	0.928456		9.46348	0.974475		9.46348	0.909793
9.538	0.981889		9.538	0.94198		9.538	0.943686		9.538	0.956716		9.538	0.985909		9.538	0.947345		9.538	0.984437		9.538	1.0103		9.538	0.97291		9.538	0.974937		9.538	0.945276		9.538	1.06418		9.538	0.949273		9.538	0.929993		9.538	0.975801		9.538	0.911502
9.61251	0.983531		9.61251	0.943561		9.61251	0.945323		9.61251	0.958343		9.61251	0.98654		9.61251	0.949437		9.61251	0.983806		9.61251	1.01009		9.61251	0.972654		9.61251	0.977224		9.61251	0.945418		9.61251	1.06464		9.61251	0.950797		9.61251	0.930836		9.61251	0.976221		9.61251	0.910952
9.68703	0.985482		9.68703	0.944879		9.68703	0.945803		9.68703	0.958891		9.68703	0.988844		9.68703	0.949068		9.68703	0.985158		9.68703	1.01171		9.68703	0.973917		9.68703	0.977331		9.68703	0.946333		9.68703	1.06744		9.68703	0.952185		9.68703	0.932054		9.68703	0.976461		9.68703	0.911344
9.76154	0.987589		9.76154	0.944917		9.76154	0.946415		9.76154	0.961019		9.76154	0.991324		9.76154	0.951641		9.76154	0.98578		9.76154	1.0116		9.76154	0.97523		9.76154	0.978306		9.76154	0.94703		9.76154	1.06842		9.76154	0.952129		9.76154	0.934085		9.76154	0.978378		9.76154	0.910832
9.83606	0.989256		9.83606	0.94615		9.83606	0.947108		9.83606	0.961569		9.83606	0.992578		9.83606	0.952		9.83606	0.986448		9.83606	1.01299		9.83606	0.976745		9.83606	0.979151		9.83606	0.947205		9.83606	1.07038		9.83606	0.952596		9.83606	0.93381		9.83606	0.978611		9.83606	0.912486
9.91057	0.989244		9.91057	0.947489		9.91057	0.948844		9.91057	0.962121		9.91057	0.994116		9.91057	0.951588		9.91057	0.985684		9.91057	1.0143		9.91057	0.977109		9.91057	0.979617		9.91057	0.94761		9.91057	1.07255		9.91057	0.953339		9.91057	0.935076		9.91057	0.97989		9.91057	0.912387
9.98509	0.992571		9.98509	0.947575		9.98509	0.949628		9.98509	0.964831		9.98509	0.995346		9.98509	0.952547		9.98509	0.987895		9.98509	1.01537		9.98509	0.978695		9.98509	0.981521		9.98509	0.948925		9.98509	1.07435		9.98509	0.953411		9.98509	0.934847		9.98509	0.980595		9.98509	0.912968
10.0596	0.994177		10.0596	0.948897		10.0596	0.951578		10.0596	0.964623		10.0596	0.996545		10.0596	0.953693		10.0596	0.987571		10.0596	1.01485		10.0596	0.979882		10.0596	0.982387		10.0596	0.948719		10.0596	1.0759		10.0596	0.954792		10.0596	0.936419		10.0596	0.981179		10.0596	0.913376
10.1341	0.99621		10.1341	0.949907		10.1341	0.952127		10.1341	0.965214		10.1341	0.998667		10.1341	0.95517		10.1341	0.988202		10.1341	1.01528		10.1341	0.982598		10.1341	0.984098		10.1341	0.94918		10.1341	1.07953		10.1341	0.95485		10.1341	0.937974		10.1341	0.982081		10.1341	0.913794
10.2086	0.997561		10.2086	0.952311		10.2086	0.951388		10.2086	0.966412		10.2086	1.00236		10.2086	0.953122		10.2086	0.990455		10.2086	1.01539		10.2086	0.982489		10.2086	0.986075		10.2086	0.950295		10.2086	1.07978		10.2086	0.956574		10.2086	0.938243		10.2086	0.983073		10.2086	0.913463
10.2832	0.997885		10.2832	0.951505		10.2832	0.952624		10.2832	0.966778		10.2832	1.00217		10.2832	0.955402		10.2832	0.990137		10.2832	1.0153		10.2832	0.984999		10.2832	0.984774		10.2832	0.951386		10.2832	1.08027		10.2832	0.95647		10.2832	0.938679		10.2832	0.983336		10.2832	0.914728
10.3577	1.00067		10.3577	0.953187		10.3577	0.952251		10.3577	0.968101		10.3577	1.00296		10.3577	0.957019		10.3577	0.990787		10.3577	1.01646		10.3577	0.986414		10.3577	0.986764		10.3577	0.951918		10.3577	1.08244		10.3577	0.95641		10.3577	0.939909		10.3577	0.983993		10.3577	0.914178
10.4322	1.00029		10.4322	0.954164		10.4322	0.952667		10.4322	0.969488		10.4322	1.0042		10.4322	0.957467		10.4322	0.991793		10.4322	1.01669		10.4322	0.985678		10.4322	0.987463		10.4322	0.952393		10.4322	1.08219		10.4322	0.958937		10.4322	0.940836		10.4322	0.987101		10.4322	0.916343
10.5067	1.00372		10.5067	0.954838		10.5067	0.954219		10.5067	0.970303		10.5067	1.00667		10.5067	0.957667		10.5067	0.993815		10.5067	1.01715		10.5067	0.987048		10.5067	0.988355		10.5067	0.953602		10.5067	1.08349		10.5067	0.960063		10.5067	0.943072		10.5067	0.987811		10.5067	0.914514
10.5812	1.00594		10.5812	0.956529		10.5812	0.955117		10.5812	0.970809		10.5812	1.00746		10.5812	0.959718		10.5812	0.993113		10.5812	1.0186		10.5812	0.989312		10.5812	0.989264		10.5812	0.954116		10.5812	1.08506		10.5812	0.960375		10.5812	0.943296		10.5812	0.988289		10.5812	0.916319
10.6557	1.00619		10.6557	0.957242		10.6557	0.956067		10.6557	0.97169		10.6557	1.01038		10.6557	0.959848		10.6557	0.99478		10.6557	1.01739		10.6557	0.989623		10.6557	0.990049		10.6557	0.953619		10.6557	1.08603		10.6557	0.961204		10.6557	0.944526		10.6557	0.989898		10.6557	0.91752
10.7302	1.00784		10.7302	0.957844		10.7302	0.955434		10.7302	0.973448		10.7302	1.01131		10.7302	0.961279		10.7302	0.995898		10.7302	1.01849		10.7302	0.992755		10.7302	0.990526		10.7302	0.956149		10.7302	1.08602		10.7302	0.962172		10.7302	0.946228		10.7302	0.990914		10.7302	0.917298
10.8048	1.00872		10.8048	0.957328		10.8048	0.955518		10.8048	0.974582		10.8048	1.01362		10.8048	0.962334		10.8048	0.997614		10.8048	1.0184		10.8048	0.994148		10.8048	0.990412		10.8048	0.956843		10.8048	1.08595		10.8048	0.963238		10.8048	0.947307		10.8048	0.990651		10.8048	0.917147
10.8793	1.01019		10.8793	0.958717		10.8793	0.957004		10.8793	0.977424		10.8793	1.01432		10.8793	0.963101		10.8793	0.997698		10.8793	1.01978		10.8793	0.995435		10.8793	0.992223		10.8793	0.957584		10.8793	1.08832		10.8793	0.964284		10.8793	0.949714		10.8793	0.991021		10.8793	0.918604
10.9538	1.01232		10.9538	0.959032		10.9538	0.957282		10.9538	0.977235		10.9538	1.01663		10.9538	0.963908		10.9538	0.999306		10.9538	1.02114		10.9538	0.996768		10.9538	0.994174		10.9538	0.957143		10.9538	1.08756		10.9538	0.966487		10.9538	0.949907		10.9538	0.994078		10.9538	0.918273
11.0283	1.01358		11.0283	0.960145		11.0283	0.957321		11.0283	0.979057		11.0283	1.01906		11.0283	0.966112		11.0283	0.999044		11.0283	1.02083		11.0283	0.998727		11.0283	0.993761		11.0283	0.958702		11.0283	1.08927		11.0283	0.967261		11.0283	0.951844		11.0283	0.994447		11.0283	0.918606
11.1028	1.01394		11.1028	0.960797		11.1028	0.960339		11.1028	0.979783		11.1028	1.01949		11.1028	0.966388		11.1028	1.00012		11.1028	1.02056		11.1028	0.999838		11.1028	0.995705		11.1028	0.95959		11.1028	1.08935		11.1028	0.967919		11.1028	0.952633		11.1028	0.996079		11.1028	0.919564
11.1773	1.01843		11.1773	0.961241		11.1773	0.960604		11.1773	0.981097		11.1773	1.02208		11.1773	0.968775		11.1773	1.00108		11.1773	1.02218		11.1773	1.00117		11.1773	0.994573		11.1773	0.960017		11.1773	1.09083		11.1773	0.968392		11.1773	0.953454		11.1773	0.996453		11.1773	0.920388
11.2519	1.01755		11.2519	0.962522		11.2519	0.961764		11.2519	0.981637		11.2519	1.02177		11.2519	0.969705		11.2519	1.00298		11.2519	1.02405		11.2519	1.00314		11.2519	0.99701		11.2519	0.961662		11.2519	1.0918		11.2519	0.967736		11.2519	0.953368		11.2519	0.997491		11.2519	0.920249
11.3264	1.01862		11.3264	0.962402		11.3264	0.96263		11.3264	0.982754		11.3264	1.0242		11.3264	0.969253		11.3264	1.00421		11.3264	1.02441		11.3264	1.00542		11.3264	0.997775		11.3264	0.960402		11.3264	1.09145		11.3264	0.969025		11.3264	0.956354		11.3264	0.998459		11.3264	0.921601
11.4009	1.01871		11.4009	0.963245		11.4009	0.962913		11.4009	0.983127		11.4009	1.02638		11.4009	0.970843		11.4009	1.00461		11.4009	1.02573		11.4009	1.00636		11.4009	1.00021		11.4009	0.961817		11.4009	1.09139		11.4009	0.969076		11.4009	0.956304		11.4009	0.99887		11.4009	0.921709
11.4754	1.02231		11.4754	0.96396		11.4754	0.964719		11.4754	0.983404		11.4754	1.02905		11.4754	0.97257		11.4754	1.00669		11.4754	1.0266		11.4754	1.00854		11.4754	0.999646		11.4754	0.96361		11.4754	1.09343		11.4754	0.970877		11.4754	0.958407		11.4754	1.0008		11.4754	0.922679
11.5499	1.02243		11.5499	0.965591		11.5499	0.964164		11.5499	0.985557		11.5499	1.02888		11.5499	0.973114		11.5499	1.00962		11.5499	1.02618		11.5499	1.00882		11.5499	1.00097		11.5499	0.96412		11.5499	1.09273		11.5499	0.971235		11.5499	0.958904		11.5499	1.00122		11.5499	0.922729
11.6244	1.02293		11.6244	0.966424		11.6244	0.967947		11.6244	0.98701		11.6244	1.03083		11.6244	0.974472		11.6244	1.0079		11.6244	1.02722		11.6244	1.01184		11.6244	1.00087		11.6244	0.964331		11.6244	1.09445		11.6244	0.971577		11.6244	0.960663		11.6244	1.00199		11.6244	0.9225
11.6989	1.02458		11.6989	0.96759		11.6989	0.967769		11.6989	0.987833		11.6989	1.03305		11.6989	0.975123		11.6989	1.01031		11.6989	1.02771		11.6989	1.0135		11.6989	1.00337		11.6989	0.965566		11.6989	1.0934		11.6989	0.971193		11.6989	0.962092		11.6989	1.00236		11.6989	0.922899
11.7735	1.02523		11.7735	0.967853		11.7735	0.96748		11.7735	0.987523		11.7735	1.03375		11.7735	0.976613		11.7735	1.01125		11.7735	1.02935		11.7735	1.01497		11.7735	1.00349		11.7735	0.965962		11.7735	1.09531		11.7735	0.97217		11.7735	0.961865		11.7735	1.00414		11.7735	0.924022
11.848	1.02746		11.848	0.969147		11.848	0.970748		11.848	0.990378		11.848	1.03547		11.848	0.978001		11.848	1.01308		11.848	1.03066		11.848	1.01576		11.848	1.00499		11.848	0.969036		11.848	1.09469		11.848	0.972433		11.848	0.96426		11.848	1.00556		11.848	0.925467
11.9225	1.02712		11.9225	0.970104		11.9225	0.971761		11.9225	0.990783		11.9225	1.03688		11.9225	0.977709		11.9225	1.01401		11.9225	1.0299		11.9225	1.0177		11.9225	1.00421		11.9225	0.967777		11.9225	1.09493		11.9225	0.972639		11.9225	0.965231		11.9225	1.00574		11.9225	0.925339
11.997	1.02836		11.997	0.971347		11.997	0.971568		11.997	0.991132		11.997	1.03772		11.997	0.980557		11.997	1.01395		11.997	1.03096		11.997	1.0207		11.997	1.00479		11.997	0.968204		11.997	1.09615		11.997	0.973137		11.997	0.965773		11.997	1.00843		11.997	0.925726
12.0715	1.02848		12.0715	0.971659		12.0715	0.974012		12.0715	0.992858		12.0715	1.03979		12.0715	0.982277		12.0715	1.01569		12.0715	1.03091		12.0715	1.0217		12.0715	1.00546		12.0715	0.970285		12.0715	1.09651		12.0715	0.97419		12.0715	0.967853		12.0715	1.00893		12.0715	0.926767
12.146	1.02917		12.146	0.973019		12.146	0.97451		12.146	0.993845		12.146	1.04125		12.146	0.981925		12.146	1.01756		12.146	1.03281		12.146	1.02389		12.146	1.00606		12.146	0.97077		12.146	1.09616		12.146	0.974274		12.146	0.969198		12.146	1.01099		12.146	0.927393
12.2206	1.0316		12.2206	0.97311		12.2206	0.974877		12.2206	0.994542		12.2206	1.04325		12.2206	0.984607		12.2206	1.01739		12.2206	1.03356		12.2206	1.02622		12.2206	1.0092		12.2206	0.971678		12.2206	1.09812		12.2206	0.974657		12.2206	0.969517		12.2206	1.01164		12.2206	0.927737
12.2951	1.03194		12.2951	0.975289		12.2951	0.975797		12.2951	0.994168		12.2951	1.04398		12.2951	0.985295		12.2951	1.02081		12.2951	1.03223		12.2951	1.02722		12.2951	1.0081		12.2951	0.971958		12.2951	1.09844		12.2951	0.975419		12.2951	0.972067		12.2951	1.01303		12.2951	0.926793
12.3696	1.03441		12.3696	0.975744		12.3696	0.977557		12.3696	0.995624		12.3696	1.04309		12.3696	0.986905		12.3696	1.01969		12.3696	1.03344		12.3696	1.02905		12.3696	1.00879		12.3696	0.973808		12.3696	1.09842		12.3696	0.976465		12.3696	0.972344		12.3696	1.01395		12.3696	0.928776
12.4441	1.03551		12.4441	0.976848		12.4441	0.979547		12.4441	0.996469		12.4441	1.04559		12.4441	0.987463		12.4441	1.02238		12.4441	1.03423		12.4441	1.03052		12.4441	1.01036		12.4441	0.974455		12.4441	1.09735		12.4441	0.977151		12.4441	0.974021		12.4441	1.01514		12.4441	0.928964
12.5186	1.03436		12.5186	0.978748		12.5186	0.980448		12.5186	0.998084		12.5186	1.04588		12.5186	0.988694		12.5186	1.02588		12.5186	1.03428		12.5186	1.03185		12.5186	1.01161		12.5186	0.975049		12.5186	1.09911		12.5186	0.977732		12.5186	0.974948		12.5186	1.01587		12.5186	0.928686
12.5931	1.037		12.5931	0.978165		12.5931	0.979704		12.5931	0.998072		12.5931	1.0474		12.5931	0.988688		12.5931	1.02561		12.5931	1.03485		12.5931	1.03522		12.5931	1.01201		12.5931	0.9759		12.5931	1.0989		12.5931	0.978792		12.5931	0.976142		12.5931	1.01835		12.5931	0.930534
12.6677	1.03821		12.6677	0.979293		12.6677	0.980674		12.6677	0.997703		12.6677	1.04939		12.6677	0.990527		12.6677	1.02709		12.6677	1.03491		12.6677	1.03664		12.6677	1.01289		12.6677	0.976222		12.6677	1.09868		12.6677	0.978379		12.6677	0.977893		12.6677	1.01751		12.6677	0.930416
12.7422	1.03923		12.7422	0.979144		12.7422	0.982079		12.7422	0.999687		12.7422	1.05089		12.7422	0.992346		12.7422	1.02882		12.7422	1.03583		12.7422	1.03753		12.7422	1.01207		12.7422	0.97805		12.7422	1.09864		12.7422	0.978977		12.7422	0.978709		12.7422	1.01929		12.7422	0.930097
12.8167	1.03984		12.8167	0.98056		12.8167	0.982387		12.8167	1.00048		12.8167	1.05292		12.8167	0.992724		12.8167	1.0296		12.8167	1.03609		12.8167	1.04146		12.8167	1.01474		12.8167	0.977584		12.8167	1.0992		12.8167	0.979822		12.8167	0.980088		12.8167	1.02164		12.8167	0.93195
12.8912	1.04054		12.8912	0.981719		12.8912	0.984304		12.8912	0.999812		12.8912	1.05323		12.8912	0.995606		12.8912	1.03067		12.8912	1.03642		12.8912	1.04247		12.8912	1.01458		12.8912	0.978372		12.8912	1.09934		12.8912	0.98003		12.8912	0.980103		12.8912	1.02243		12.8912	0.931124
12.9657	1.04076		12.9657	0.981196		12.9657	0.985685		12.9657	1.00113		12.9657	1.05509		12.9657	0.996639		12.9657	1.03175		12.9657	1.03743		12.9657	1.04605		12.9657	1.01552		12.9657	0.980445		12.9657	1.09986		12.9657	0.979594		12.9657	0.982655		12.9657	1.02373		12.9657	0.930956
13.0402	1.04138		13.0402	0.983612		13.0402	0.985045		13.0402	1.00277		13.0402	1.05608		13.0402	0.997469		13.0402	1.03452		13.0402	1.03713		13.0402	1.04771		13.0402	1.01695		13.0402	0.980758		13.0402	1.10071		13.0402	0.978841		13.0402	0.986138		13.0402	1.02439		13.0402	0.932292
13.1147	1.04379		13.1147	0.983576		13.1147	0.987653		13.1147	1.00265		13.1147	1.05755		13.1147	0.998724		13.1147	1.03595		13.1147	1.03882		13.1147	1.05069		13.1147	1.0173		13.1147	0.981133		13.1147	1.10099		13.1147	0.980446		13.1147	0.984663		13.1147	1.02604		13.1147	0.93262
13.1893	1.04496		13.1893	0.984281		13.1893	0.986119		13.1893	1.00409		13.1893	1.0587		13.1893	0.998747		13.1893	1.03624		13.1893	1.03936		13.1893	1.05184		13.1893	1.01708		13.1893	0.980708		13.1893	1.10096		13.1893	0.98115		13.1893	0.986275		13.1893	1.02619		13.1893	0.933715
13.2638	1.04477		13.2638	0.985078		13.2638	0.988458		13.2638	1.00427		13.2638	1.06083		13.2638	0.999769		13.2638	1.03785		13.2638	1.04057		13.2638	1.05571		13.2638	1.01764		13.2638	0.982759		13.2638	1.10076		13.2638	0.980967		13.2638	0.987131		13.2638	1.02716		13.2638	0.93314
13.3383	1.04583		13.3383	0.986575		13.3383	0.988364		13.3383	1.005		13.3383	1.06161		13.3383	1.00163		13.3383	1.03855		13.3383	1.04052		13.3383	1.05778		13.3383	1.01765		13.3383	0.983108		13.3383	1.10054		13.3383	0.98197		13.3383	0.987406		13.3383	1.02867		13.3383	0.933017
13.4128	1.04747		13.4128	0.986951		13.4128	0.990556		13.4128	1.00557		13.4128	1.06261		13.4128	1.00251		13.4128	1.04041		13.4128	1.04043		13.4128	1.0602		13.4128	1.01955		13.4128	0.984967		13.4128	1.10061		13.4128	0.982669		13.4128	0.990287		13.4128	1.02957		13.4128	0.935268
13.4873	1.04685		13.4873	0.987033		13.4873	0.989543		13.4873	1.00572		13.4873	1.06267		13.4873	1.00469		13.4873	1.04162		13.4873	1.04266		13.4873	1.06225		13.4873	1.01904		13.4873	0.984628		13.4873	1.10031		13.4873	0.983662		13.4873	0.990241		13.4873	1.03049		13.4873	0.935353
13.5618	1.04817		13.5618	0.988391		13.5618	0.992226		13.5618	1.00661		13.5618	1.06337		13.5618	1.00494		13.5618	1.04243		13.5618	1.04369		13.5618	1.06399		13.5618	1.02063		13.5618	0.986748		13.5618	1.09895		13.5618	0.983542		13.5618	0.991205		13.5618	1.03163		13.5618	0.935526
13.6364	1.05045		13.6364	0.988945		13.6364	0.993341		13.6364	1.00814		13.6364	1.06384		13.6364	1.00705		13.6364	1.04343		13.6364	1.04368		13.6364	1.06484		13.6364	1.02063		13.6364	0.988626		13.6364	1.09837		13.6364	0.985061		13.6364	0.991845		13.6364	1.03313		13.6364	0.935625
13.7109	1.05123		13.7109	0.990663		13.7109	0.993353		13.7109	1.00915		13.7109	1.06659		13.7109	1.00831		13.7109	1.04424		13.7109	1.04321		13.7109	1.0674		13.7109	1.02149		13.7109	0.988546		13.7109	1.09578		13.7109	0.985472		13.7109	0.992224		13.7109	1.03245		13.7109	0.936467
13.7854	1.0502		13.7854	0.99209		13.7854	0.99477		13.7854	1.00842		13.7854	1.06621		13.7854	1.00972		13.7854	1.04612		13.7854	1.04378		13.7854	1.06954		13.7854	1.02201		13.7854	0.989756		13.7854	1.09528		13.7854	0.986029		13.7854	0.993683		13.7854	1.03485		13.7854	0.936611
13.8599	1.05372		13.8599	0.991805		13.8599	0.99503		13.8599	1.00901		13.8599	1.06587		13.8599	1.01074		13.8599	1.04661		13.8599	1.04489		13.8599	1.0716		13.8599	1.02309		13.8599	0.991096		13.8599	1.09402		13.8599	0.987782		13.8599	0.995064		13.8599	1.03468		13.8599	0.936791
13.9344	1.05206		13.9344	0.992522		13.9344	0.996926		13.9344	1.00984		13.9344	1.06753		13.9344	1.01169		13.9344	1.04777		13.9344	1.04599		13.9344	1.07247		13.9344	1.02352		13.9344	0.992533		13.9344	1.09359		13.9344	0.986913		13.9344	0.996233		13.9344	1.03489		13.9344	0.938181
14.0089	1.05326		14.0089	0.993755		14.0089	0.996787		14.0089	1.01059		14.0089	1.06835		14.0089	1.01294		14.0089	1.04869		14.0089	1.04627		14.0089	1.07549		14.0089	1.02488		14.0089	0.993199		14.0089	1.09245		14.0089	0.987985		14.0089	0.996961		14.0089	1.03501		14.0089	0.938381
14.0834	1.05408		14.0834	0.994216		14.0834	0.996721		14.0834	1.01048		14.0834	1.06765		14.0834	1.0156		14.0834	1.04948		14.0834	1.04653		14.0834	1.07644		14.0834	1.02446		14.0834	0.994289		14.0834	1.09264		14.0834	0.989015		14.0834	0.997469		14.0834	1.03499		14.0834	0.939705
14.158	1.0554		14.158	0.995493		14.158	0.996715		14.158	1.0115		14.158	1.06922		14.158	1.01606		14.158	1.05067		14.158	1.04665		14.158	1.07888		14.158	1.02604		14.158	0.993609		14.158	1.09249		14.158	0.989015		14.158	0.998539		14.158	1.03596		14.158	0.939252
14.2325	1.05491		14.2325	0.995461		14.2325	0.99884		14.2325	1.01118		14.2325	1.06904		14.2325	1.01676		14.2325	1.05259		14.2325	1.04861		14.2325	1.08174		14.2325	1.02476		14.2325	0.995304		14.2325	1.09119		14.2325	0.99073		14.2325	0.999456		14.2325	1.0371		14.2325	0.939351
14.307	1.05536		14.307	0.996131		14.307	0.9989		14.307	1.01211		14.307	1.07094		14.307	1.01699		14.307	1.05117		14.307	1.04909		14.307	1.08228		14.307	1.02615		14.307	0.997427		14.307	1.09252		14.307	0.991559		14.307	1.00025		14.307	1.03678		14.307	0.940345
14.3815	1.05643		14.3815	0.996512		14.3815	0.999639		14.3815	1.0132		14.3815	1.0722		14.3815	1.01866		14.3815	1.05319		14.3815	1.05023		14.3815	1.08472		14.3815	1.02548		14.3815	0.996958		14.3815	1.09156		14.3815	0.992524		14.3815	0.99978		14.3815	1.03671		14.3815	0.941841
14.456	1.0571		14.456	0.998914		14.456	1.00017		14.456	1.0142		14.456	1.07329		14.456	1.02067		14.456	1.05298		14.456	1.05052		14.456	1.08573		14.456	1.0271		14.456	0.998104		14.456	1.09039		14.456	0.991695		14.456	1.00182		14.456	1.03895		14.456	0.9414
14.5305	1.05756		14.5305	0.999221		14.5305	1.00164		14.5305	1.01347		14.5305	1.07411		14.5305	1.02116		14.5305	1.05494		14.5305	1.05227		14.5305	1.0881		14.5305	1.02788		14.5305	0.99951		14.5305	1.08939		14.5305	0.99312		14.5305	1.00191		14.5305	1.03953		14.5305	0.942736
14.6051	1.05645		14.6051	1.0011		14.6051	1.00256		14.6051	1.01507		14.6051	1.07575		14.6051	1.02279		14.6051	1.05626		14.6051	1.05415		14.6051	1.08834		14.6051	1.02543		14.6051	1.0001		14.6051	1.08886		14.6051	0.993614		14.6051	1.00326		14.6051	1.03983		14.6051	0.942726
14.6796	1.05735		14.6796	1.00103		14.6796	1.00307		14.6796	1.01583		14.6796	1.07737		14.6796	1.02471		14.6796	1.05661		14.6796	1.05308		14.6796	1.09181		14.6796	1.0262		14.6796	1.00143		14.6796	1.08812		14.6796	0.995064		14.6796	1.00256		14.6796	1.04068		14.6796	0.94363
14.7541	1.05911		14.7541	1.0014		14.7541	1.00383		14.7541	1.01586		14.7541	1.07793		14.7541	1.02429		14.7541	1.05826		14.7541	1.05443		14.7541	1.09379		14.7541	1.0271		14.7541	1.00211		14.7541	1.08688		14.7541	0.995374		14.7541	1.00258		14.7541	1.04067		14.7541	0.943113
14.8286	1.0587		14.8286	1.0029		14.8286	1.00542		14.8286	1.01605		14.8286	1.07979		14.8286	1.02683		14.8286	1.05957		14.8286	1.05573		14.8286	1.09482		14.8286	1.02834		14.8286	1.00218		14.8286	1.08692		14.8286	0.997025		14.8286	1.00249		14.8286	1.04182		14.8286	0.943984
14.9031	1.06025		14.9031	1.00347		14.9031	1.00588		14.9031	1.01717		14.9031	1.07989		14.9031	1.02617		14.9031	1.05965		14.9031	1.05596		14.9031	1.09666		14.9031	1.02739		14.9031	1.00376		14.9031	1.08558		14.9031	0.998392		14.9031	1.00314		14.9031	1.04217		14.9031	0.94553
14.9776	1.05934		14.9776	1.00446		14.9776	1.00643		14.9776	1.01869		14.9776	1.0814		14.9776	1.02821		14.9776	1.06095		14.9776	1.05536		14.9776	1.10008		14.9776	1.02957		14.9776	1.0032		14.9776	1.08595		14.9776	0.998237		14.9776	1.00312		14.9776	1.04319		14.9776	0.945575
15.0522	1.0601		15.0522	1.00523		15.0522	1.00671		15.0522	1.01956		15.0522	1.08211		15.0522	1.03035		15.0522	1.06267		15.0522	1.05599		15.0522	1.10276		15.0522	1.02939		15.0522	1.0044		15.0522	1.08489		15.0522	1.001		15.0522	1.00549		15.0522	1.04338		15.0522	0.946071
15.1267	1.06026		15.1267	1.00588		15.1267	1.00828		15.1267	1.02		15.1267	1.08452		15.1267	1.03122		15.1267	1.06307		15.1267	1.05611		15.1267	1.10467		15.1267	1.02901		15.1267	1.0043		15.1267	1.08576		15.1267	1.00073		15.1267	1.0046		15.1267	1.04327		15.1267	0.945608
15.2012	1.06143		15.2012	1.00743		15.2012	1.00805		15.2012	1.02142		15.2012	1.08369		15.2012	1.03319		15.2012	1.06254		15.2012	1.0567		15.2012	1.10649		15.2012	1.02878		15.2012	1.00554		15.2012	1.08453		15.2012	1.00147		15.2012	1.00493		15.2012	1.04388		15.2012	0.946708
15.2757	1.06118		15.2757	1.00831		15.2757	1.00837		15.2757	1.02033		15.2757	1.08621		15.2757	1.03327		15.2757	1.06434		15.2757	1.05691		15.2757	1.10722		15.2757	1.03018		15.2757	1.00599		15.2757	1.08516		15.2757	1.003		15.2757	1.00518		15.2757	1.04434		15.2757	0.946998
15.3502	1.06109		15.3502	1.0087		15.3502	1.00811		15.3502	1.02285		15.3502	1.08429		15.3502	1.03422		15.3502	1.0652		15.3502	1.05698		15.3502	1.10961		15.3502	1.02946		15.3502	1.00655		15.3502	1.08372		15.3502	1.00434		15.3502	1.00509		15.3502	1.04625		15.3502	0.948209
15.4247	1.06227		15.4247	1.00918		15.4247	1.0098		15.4247	1.02303		15.4247	1.08792		15.4247	1.03719		15.4247	1.06488		15.4247	1.05582		15.4247	1.11205		15.4247	1.02978		15.4247	1.00705		15.4247	1.08406		15.4247	1.00518		15.4247	1.0053		15.4247	1.04606		15.4247	0.948176
15.4992	1.06103		15.4992	1.00993		15.4992	1.01033		15.4992	1.02268		15.4992	1.08803		15.4992	1.0379		15.4992	1.06696		15.4992	1.05785		15.4992	1.11266		15.4992	1.03183		15.4992	1.00735		15.4992	1.08402		15.4992	1.00599		15.4992	1.00657		15.4992	1.04736		15.4992	0.947808
15.5738	1.06307		15.5738	1.01134		15.5738	1.01029		15.5738	1.02362		15.5738	1.08851		15.5738	1.03853		15.5738	1.06761		15.5738	1.05644		15.5738	1.11423		15.5738	1.0321		15.5738	1.00882		15.5738	1.08476		15.5738	1.00781		15.5738	1.00699		15.5738	1.04594		15.5738	0.948813
15.6483	1.06196		15.6483	1.01055		15.6483	1.01129		15.6483	1.02448		15.6483	1.09067		15.6483	1.03995		15.6483	1.06772		15.6483	1.05841		15.6483	1.11493		15.6483	1.03319		15.6483	1.0099		15.6483	1.08411		15.6483	1.00817		15.6483	1.00695		15.6483	1.04775		15.6483	0.949238
15.7228	1.06286		15.7228	1.01279		15.7228	1.01312		15.7228	1.02563		15.7228	1.09112		15.7228	1.04164		15.7228	1.06844		15.7228	1.05692		15.7228	1.11445		15.7228	1.03166		15.7228	1.01008		15.7228	1.08412		15.7228	1.00981		15.7228	1.00666		15.7228	1.04697		15.7228	0.949476
15.7973	1.06274		15.7973	1.01401		15.7973	1.01197		15.7973	1.02668		15.7973	1.09168		15.7973	1.041		15.7973	1.06964		15.7973	1.05742		15.7973	1.11591		15.7973	1.03197		15.7973	1.01162		15.7973	1.08522		15.7973	1.01117		15.7973	1.00725		15.7973	1.04806		15.7973	0.950014
15.8718	1.06358		15.8718	1.01567		15.8718	1.01293		15.8718	1.02803		15.8718	1.09406		15.8718	1.04489		15.8718	1.07112		15.8718	1.05849		15.8718	1.11639		15.8718	1.03224		15.8718	1.0112		15.8718	1.08467		15.8718	1.01229		15.8718	1.00714		15.8718	1.04658		15.8718	0.950564
15.9463	1.06404		15.9463	1.01591		15.9463	1.01398		15.9463	1.02952		15.9463	1.09542		15.9463	1.04597		15.9463	1.07136		15.9463	1.05775		15.9463	1.11744		15.9463	1.0329		15.9463	1.01227		15.9463	1.08675		15.9463	1.01441		15.9463	1.00749		15.9463	1.04811		15.9463	0.949948
16.0209	1.06457		16.0209	1.01825		16.0209	1.01581		16.0209	1.02959		16.0209	1.09637		16.0209	1.04665		16.0209	1.07169		16.0209	1.05856		16.0209	1.11852		16.0209	1.0319		16.0209	1.01329		16.0209	1.0882		16.0209	1.01492		16.0209	1.00896		16.0209	1.0481		16.0209	0.950923
16.0954	1.06424		16.0954	1.01896		16.0954	1.0147		16.0954	1.03122		16.0954	1.09564		16.0954	1.0471		16.0954	1.07284		16.0954	1.05815		16.0954	1.11923		16.0954	1.03246		16.0954	1.01381		16.0954	1.08767		16.0954	1.01603		16.0954	1.00842		16.0954	1.04872		16.0954	0.952551
16.1699	1.06489		16.1699	1.01961		16.1699	1.01721		16.1699	1.03096		16.1699	1.0982		16.1699	1.04867		16.1699	1.07362		16.1699	1.05832		16.1699	1.11986		16.1699	1.03377		16.1699	1.01371		16.1699	1.09037		16.1699	1.01716		16.1699	1.01007		16.1699	1.05056		16.1699	0.951744
16.2444	1.06429		16.2444	1.02126		16.2444	1.01788		16.2444	1.03284		16.2444	1.10051		16.2444	1.04787		16.2444	1.07378		16.2444	1.05854		16.2444	1.12158		16.2444	1.033		16.2444	1.01567		16.2444	1.09148		16.2444	1.0193		16.2444	1.00974		16.2444	1.04991		16.2444	0.953165
16.3189	1.06519		16.3189	1.02192		16.3189	1.01732		16.3189	1.03321		16.3189	1.1005		16.3189	1.05028		16.3189	1.07397		16.3189	1.05859		16.3189	1.12248		16.3189	1.03284		16.3189	1.01664		16.3189	1.09329		16.3189	1.02071		16.3189	1.00955		16.3189	1.05023		16.3189	0.952948
16.3934	1.06493		16.3934	1.0231		16.3934	1.01826		16.3934	1.03327		16.3934	1.102		16.3934	1.05229		16.3934	1.07737		16.3934	1.05931		16.3934	1.12178		16.3934	1.03356		16.3934	1.01575		16.3934	1.09357		16.3934	1.02177		16.3934	1.01118		16.3934	1.0497		16.3934	0.953472
16.4679	1.06493		16.4679	1.02456		16.4679	1.01682		16.4679	1.03606		16.4679	1.10336		16.4679	1.05346		16.4679	1.07723		16.4679	1.05813		16.4679	1.12297		16.4679	1.03461		16.4679	1.01755		16.4679	1.09534		16.4679	1.02308		16.4679	1.01094		16.4679	1.04985		16.4679	0.953467
16.5425	1.06441		16.5425	1.02609		16.5425	1.01955		16.5425	1.03615		16.5425	1.10412		16.5425	1.0546		16.5425	1.07726		16.5425	1.05981		16.5425	1.12353		16.5425	1.03437		16.5425	1.0176		16.5425	1.09699		16.5425	1.02448		16.5425	1.01187		16.5425	1.05017		16.5425	0.954742
16.617	1.06429		16.617	1.02702		16.617	1.01933		16.617	1.03678		16.617	1.10678		16.617	1.05471		16.617	1.07777		16.617	1.06018		16.617	1.12491		16.617	1.03459		16.617	1.01838		16.617	1.09748		16.617	1.02692		16.617	1.01273		16.617	1.0518		16.617	0.955192
16.6915	1.0645		16.6915	1.02911		16.6915	1.01965		16.6915	1.03703		16.6915	1.10713		16.6915	1.05627		16.6915	1.07942		16.6915	1.05874		16.6915	1.12288		16.6915	1.03537		16.6915	1.01984		16.6915	1.0986		16.6915	1.02679		16.6915	1.01225		16.6915	1.05128		16.6915	0.954404
16.766	1.06561		16.766	1.02881		16.766	1.02064		16.766	1.03726		16.766	1.10903		16.766	1.05738		16.766	1.07957		16.766	1.05906		16.766	1.1249		16.766	1.03634		16.766	1.01994		16.766	1.09964		16.766	1.02768		16.766	1.01355		16.766	1.05263		16.766	0.954876
16.8405	1.06695		16.8405	1.03059		16.8405	1.02203		16.8405	1.03819		16.8405	1.11027		16.8405	1.05792		16.8405	1.08156		16.8405	1.06042		16.8405	1.12655		16.8405	1.03654		16.8405	1.01948		16.8405	1.10211		16.8405	1.0301		16.8405	1.01293		16.8405	1.05339		16.8405	0.956613
16.915	1.06631		16.915	1.03254		16.915	1.02324		16.915	1.03981		16.915	1.11047		16.915	1.05999		16.915	1.08125		16.915	1.05956		16.915	1.12522		16.915	1.03551		16.915	1.02296		16.915	1.10183		16.915	1.03096		16.915	1.01522		16.915	1.05216		16.915	0.955565
16.9896	1.06711		16.9896	1.03319		16.9896	1.02241		16.9896	1.04103		16.9896	1.11117		16.9896	1.06048		16.9896	1.08176		16.9896	1.0598		16.9896	1.124		16.9896	1.03611		16.9896	1.02233		16.9896	1.10378		16.9896	1.03074		16.9896	1.01495		16.9896	1.05411		16.9896	0.958022
17.0641	1.0665		17.0641	1.03462		17.0641	1.02259		17.0641	1.04254		17.0641	1.11216		17.0641	1.06193		17.0641	1.08298		17.0641	1.06039		17.0641	1.12307		17.0641	1.03712		17.0641	1.02418		17.0641	1.10424		17.0641	1.03338		17.0641	1.01587		17.0641	1.05419		17.0641	0.958258
17.1386	1.06695		17.1386	1.03637		17.1386	1.02359		17.1386	1.04164		17.1386	1.11288		17.1386	1.06198		17.1386	1.08383		17.1386	1.05998		17.1386	1.12301		17.1386	1.03699		17.1386	1.02445		17.1386	1.10623		17.1386	1.03328		17.1386	1.01519		17.1386	1.05443		17.1386	0.957262
17.2131	1.06796		17.2131	1.037		17.2131	1.02374		17.2131	1.04357		17.2131	1.11276		17.2131	1.06319		17.2131	1.08351		17.2131	1.06107		17.2131	1.12556		17.2131	1.03872		17.2131	1.02336		17.2131	1.10597		17.2131	1.0335		17.2131	1.01607		17.2131	1.05453		17.2131	0.957288
17.2876	1.06721		17.2876	1.03992		17.2876	1.02372		17.2876	1.04362		17.2876	1.1135		17.2876	1.06524		17.2876	1.08454		17.2876	1.06056		17.2876	1.12418		17.2876	1.03801		17.2876	1.0251		17.2876	1.10651		17.2876	1.03518		17.2876	1.01597		17.2876	1.05517		17.2876	0.958331
17.3621	1.06708		17.3621	1.04032		17.3621	1.02614		17.3621	1.04642		17.3621	1.11527		17.3621	1.0656		17.3621	1.08449		17.3621	1.06095		17.3621	1.12467		17.3621	1.03822		17.3621	1.02515		17.3621	1.1076		17.3621	1.03669		17.3621	1.01674		17.3621	1.05445		17.3621	0.958907
17.4366	1.06795		17.4366	1.04189		17.4366	1.0262		17.4366	1.04577		17.4366	1.11581		17.4366	1.06601		17.4366	1.08588		17.4366	1.06179		17.4366	1.12382		17.4366	1.03766		17.4366	1.02599		17.4366	1.10885		17.4366	1.03672		17.4366	1.01672		17.4366	1.05461		17.4366	0.958676
17.5112	1.06762		17.5112	1.04346		17.5112	1.02631		17.5112	1.04674		17.5112	1.11515		17.5112	1.06898		17.5112	1.08585		17.5112	1.06205		17.5112	1.12404		17.5112	1.03961		17.5112	1.02657		17.5112	1.10855		17.5112	1.03833		17.5112	1.01713		17.5112	1.05491		17.5112	0.958794
17.5857	1.06666		17.5857	1.04324		17.5857	1.02608		17.5857	1.04795		17.5857	1.11667		17.5857	1.06796		17.5857	1.08737		17.5857	1.06207		17.5857	1.12512		17.5857	1.03837		17.5857	1.02626		17.5857	1.11095		17.5857	1.03908		17.5857	1.01885		17.5857	1.0551		17.5857	0.959353
17.6602	1.06864		17.6602	1.04575		17.6602	1.02783		17.6602	1.0485		17.6602	1.11917		17.6602	1.06989		17.6602	1.0886		17.6602	1.06269		17.6602	1.12503		17.6602	1.04014		17.6602	1.02745		17.6602	1.1123		17.6602	1.04024		17.6602	1.01834		17.6602	1.05615		17.6602	0.959924
17.7347	1.06882		17.7347	1.04583		17.7347	1.02814		17.7347	1.04958		17.7347	1.1181		17.7347	1.07061		17.7347	1.08906		17.7347	1.06324		17.7347	1.12462		17.7347	1.03839		17.7347	1.02774		17.7347	1.11315		17.7347	1.03976		17.7347	1.01893		17.7347	1.05639		17.7347	0.960651
17.8092	1.0679		17.8092	1.04773		17.8092	1.02802		17.8092	1.0494		17.8092	1.1204		17.8092	1.07003		17.8092	1.09088		17.8092	1.06236		17.8092	1.12489		17.8092	1.039		17.8092	1.0293		17.8092	1.11528		17.8092	1.04085		17.8092	1.02011		17.8092	1.05722		17.8092	0.961418
17.8837	1.06866		17.8837	1.04808		17.8837	1.02897		17.8837	1.05042		17.8837	1.12056		17.8837	1.07159		17.8837	1.09089		17.8837	1.06336		17.8837	1.12558		17.8837	1.03824		17.8837	1.02932		17.8837	1.11624		17.8837	1.04256		17.8837	1.02008		17.8837	1.0543		17.8837	0.961572
17.9583	1.06821		17.9583	1.04941		17.9583	1.03037		17.9583	1.05159		17.9583	1.12221		17.9583	1.07229		17.9583	1.0913		17.9583	1.06499		17.9583	1.12529		17.9583	1.03933		17.9583	1.0301		17.9583	1.11751		17.9583	1.04457		17.9583	1.01964		17.9583	1.05634		17.9583	0.962629
18.0328	1.06894		18.0328	1.04937		18.0328	1.02975		18.0328	1.05204		18.0328	1.12271		18.0328	1.07385		18.0328	1.09402		18.0328	1.0638		18.0328	1.12541		18.0328	1.0408		18.0328	1.03044		18.0328	1.11728		18.0328	1.04246		18.0328	1.0214		18.0328	1.05536		18.0328	0.96182
18.1073	1.06794		18.1073	1.0513		18.1073	1.03084		18.1073	1.05294		18.1073	1.1232		18.1073	1.07532		18.1073	1.09303		18.1073	1.06474		18.1073	1.1254		18.1073	1.04008		18.1073	1.03092		18.1073	1.11735		18.1073	1.04462		18.1073	1.0218		18.1073	1.05513		18.1073	0.962178
18.1818	1.06879		18.1818	1.0525		18.1818	1.03097		18.1818	1.05416		18.1818	1.12474		18.1818	1.07545		18.1818	1.09447		18.1818	1.06529		18.1818	1.1257		18.1818	1.03875		18.1818	1.03142		18.1818	1.11963		18.1818	1.04404		18.1818	1.02153		18.1818	1.05659		18.1818	0.963514
18.2563	1.0689		18.2563	1.05364		18.2563	1.03196		18.2563	1.05512		18.2563	1.1259		18.2563	1.07583		18.2563	1.09491		18.2563	1.06567		18.2563	1.12581		18.2563	1.03875		18.2563	1.03193		18.2563	1.11872		18.2563	1.04416		18.2563	1.02171		18.2563	1.05555		18.2563	0.962601
18.3308	1.07099		18.3308	1.05392		18.3308	1.03342		18.3308	1.05493		18.3308	1.12807		18.3308	1.07934		18.3308	1.09499		18.3308	1.06718		18.3308	1.12586		18.3308	1.03905		18.3308	1.03255		18.3308	1.11969		18.3308	1.04591		18.3308	1.02326		18.3308	1.055		18.3308	0.963977
18.4054	1.06905		18.4054	1.0547		18.4054	1.03261		18.4054	1.05637		18.4054	1.12802		18.4054	1.07887		18.4054	1.0962		18.4054	1.06761		18.4054	1.12651		18.4054	1.04019		18.4054	1.03299		18.4054	1.11967		18.4054	1.04476		18.4054	1.02305		18.4054	1.05496		18.4054	0.963181
18.4799	1.06942		18.4799	1.05535		18.4799	1.03324		18.4799	1.05686		18.4799	1.12988		18.4799	1.08038		18.4799	1.09705		18.4799	1.06755		18.4799	1.12519		18.4799	1.0397		18.4799	1.03208		18.4799	1.11948		18.4799	1.04586		18.4799	1.02497		18.4799	1.05488		18.4799	0.963726
18.5544	1.07078		18.5544	1.05612		18.5544	1.03359		18.5544	1.05747		18.5544	1.13083		18.5544	1.08127		18.5544	1.09861		18.5544	1.06898		18.5544	1.12597		18.5544	1.03894		18.5544	1.03282		18.5544	1.11835		18.5544	1.04723		18.5544	1.02507		18.5544	1.05498		18.5544	0.965324
18.6289	1.06956		18.6289	1.05746		18.6289	1.03422		18.6289	1.05792		18.6289	1.13257		18.6289	1.08197		18.6289	1.0991		18.6289	1.07071		18.6289	1.12505		18.6289	1.03777		18.6289	1.03318		18.6289	1.1175		18.6289	1.04627		18.6289	1.02443		18.6289	1.05564		18.6289	0.965161
18.7034	1.0706		18.7034	1.05811		18.7034	1.03455		18.7034	1.06028		18.7034	1.133		18.7034	1.08374		18.7034	1.09946		18.7034	1.07147		18.7034	1.1248		18.7034	1.03766		18.7034	1.03348		18.7034	1.11667		18.7034	1.04594		18.7034	1.02594		18.7034	1.05433		18.7034	0.964196
18.7779	1.0709		18.7779	1.0587		18.7779	1.03569		18.7779	1.06036		18.7779	1.13416		18.7779	1.08564		18.7779	1.0996		18.7779	1.07206		18.7779	1.12457		18.7779	1.03893		18.7779	1.03303		18.7779	1.11602		18.7779	1.04763		18.7779	1.02786		18.7779	1.05555		18.7779	0.964708
18.8524	1.07171		18.8524	1.06013		18.8524	1.03698		18.8524	1.06177		18.8524	1.13568		18.8524	1.08664		18.8524	1.10043		18.8524	1.07413		18.8524	1.12387		18.8524	1.03804		18.8524	1.03495		18.8524	1.11375		18.8524	1.04806		18.8524	1.02862		18.8524	1.05369		18.8524	0.964418
18.927	1.07137		18.927	1.06067		18.927	1.03667		18.927	1.06088		18.927	1.13581		18.927	1.08673		18.927	1.10066		18.927	1.07361		18.927	1.12411		18.927	1.03926		18.927	1.03519		18.927	1.11289		18.927	1.04791		18.927	1.02825		18.927	1.05415		18.927	0.965933
19.0015	1.07315		19.0015	1.06326		19.0015	1.03904		19.0015	1.06074		19.0015	1.13764		19.0015	1.08813		19.0015	1.10224		19.0015	1.07555		19.0015	1.12379		19.0015	1.03976		19.0015	1.03588		19.0015	1.11333		19.0015	1.04763		19.0015	1.03087		19.0015	1.05337		19.0015	0.967935
19.076	1.07095		19.076	1.06399		19.076	1.03817		19.076	1.06141		19.076	1.13797		19.076	1.08758		19.076	1.10231		19.076	1.07688		19.076	1.12301		19.076	1.03873		19.076	1.03516		19.076	1.11392		19.076	1.04999		19.076	1.03185		19.076	1.05335		19.076	0.966179
19.1505	1.07264		19.1505	1.06488		19.1505	1.03865		19.1505	1.06304		19.1505	1.13935		19.1505	1.08866		19.1505	1.10284		19.1505	1.07724		19.1505	1.12286		19.1505	1.03933		19.1505	1.03615		19.1505	1.11373		19.1505	1.05019		19.1505	1.03168		19.1505	1.05411		19.1505	0.966721
19.225	1.07338		19.225	1.06599		19.225	1.03888		19.225	1.0629		19.225	1.13983		19.225	1.08991		19.225	1.1041		19.225	1.07865		19.225	1.12267		19.225	1.03829		19.225	1.03622		19.225	1.11316		19.225	1.05114		19.225	1.03277		19.225	1.05427		19.225	0.968152
19.2995	1.07433		19.2995	1.06806		19.2995	1.04076		19.2995	1.06189		19.2995	1.14107		19.2995	1.09172		19.2995	1.10645		19.2995	1.07916		19.2995	1.12196		19.2995	1.03895		19.2995	1.03603		19.2995	1.11471		19.2995	1.05175		19.2995	1.03372		19.2995	1.05344		19.2995	0.968204
19.3741	1.07378		19.3741	1.06887		19.3741	1.04147		19.3741	1.06259		19.3741	1.14349		19.3741	1.09391		19.3741	1.10532		19.3741	1.08016		19.3741	1.1215		19.3741	1.0396		19.3741	1.03748		19.3741	1.11481		19.3741	1.05204		19.3741	1.03422		19.3741	1.05236		19.3741	0.968864
19.4486	1.07418		19.4486	1.06932		19.4486	1.04203		19.4486	1.06282		19.4486	1.14372		19.4486	1.09381		19.4486	1.10645		19.4486	1.08188		19.4486	1.12231		19.4486	1.03831		19.4486	1.03655		19.4486	1.11494		19.4486	1.05282		19.4486	1.03446		19.4486	1.0526		19.4486	0.968515
19.5231	1.07391		19.5231	1.07153		19.5231	1.04223		19.5231	1.06409		19.5231	1.14512		19.5231	1.09452		19.5231	1.10689		19.5231	1.08183		19.5231	1.12216		19.5231	1.03853		19.5231	1.03681		19.5231	1.11424		19.5231	1.05466		19.5231	1.03585		19.5231	1.0533		19.5231	0.968555
19.5976	1.07509		19.5976	1.07257		19.5976	1.04269		19.5976	1.06382		19.5976	1.14595		19.5976	1.09544		19.5976	1.10873		19.5976	1.08441		19.5976	1.1233		19.5976	1.03968		19.5976	1.03635		19.5976	1.11521		19.5976	1.05532		19.5976	1.03678		19.5976	1.05397		19.5976	0.969516
19.6721	1.07581		19.6721	1.07446		19.6721	1.04375		19.6721	1.06471		19.6721	1.14461		19.6721	1.09703		19.6721	1.10922		19.6721	1.08534		19.6721	1.12311		19.6721	1.04023		19.6721	1.03595		19.6721	1.11484		19.6721	1.05575		19.6721	1.03894		19.6721	1.05385		19.6721	0.9692
19.7466	1.07405		19.7466	1.07573		19.7466	1.04592		19.7466	1.06551		19.7466	1.1477		19.7466	1.09769		19.7466	1.11014		19.7466	1.08712		19.7466	1.12458		19.7466	1.03936		19.7466	1.03694		19.7466	1.11502		19.7466	1.05664		19.7466	1.03823		19.7466	1.05415		19.7466	0.96991
19.8211	1.07586		19.8211	1.07699		19.8211	1.04645		19.8211	1.06628		19.8211	1.14918		19.8211	1.09766		19.8211	1.11067		19.8211	1.08742		19.8211	1.12346		19.8211	1.04022		19.8211	1.03673		19.8211	1.1152		19.8211	1.05745		19.8211	1.03936		19.8211	1.05293		19.8211	0.969898
19.8957	1.07374		19.8957	1.07562		19.8957	1.04716		19.8957	1.06558		19.8957	1.14983		19.8957	1.09843		19.8957	1.11068		19.8957	1.08875		19.8957	1.12468		19.8957	1.03879		19.8957	1.03586		19.8957	1.11551		19.8957	1.05725		19.8957	1.03894		19.8957	1.05227		19.8957	0.971189
19.9702	1.07521		19.9702	1.0775		19.9702	1.04741		19.9702	1.06684		19.9702	1.15098		19.9702	1.09922		19.9702	1.11095		19.9702	1.09023		19.9702	1.12455		19.9702	1.03956		19.9702	1.03618		19.9702	1.11452		19.9702	1.06072		19.9702	1.03999		19.9702	1.05368		19.9702	0.970767
20.0447	1.07414		20.0447	1.0786		20.0447	1.04889		20.0447	1.06647		20.0447	1.15262		20.0447	1.1018		20.0447	1.11079		20.0447	1.09058		20.0447	1.12524		20.0447	1.03945		20.0447	1.0362		20.0447	1.11581		20.0447	1.05946		20.0447	1.04143		20.0447	1.05349		20.0447	0.971527
20.1192	1.07637		20.1192	1.07958		20.1192	1.04986		20.1192	1.06829		20.1192	1.15266		20.1192	1.10104		20.1192	1.11191		20.1192	1.09218		20.1192	1.12709		20.1192	1.04084		20.1192	1.03718		20.1192	1.11525		20.1192	1.05914		20.1192	1.0424		20.1192	1.05236		20.1192	0.972032
20.1937	1.07669		20.1937	1.08031		20.1937	1.04995		20.1937	1.06786		20.1937	1.15431		20.1937	1.10226		20.1937	1.1132		20.1937	1.09388		20.1937	1.12755		20.1937	1.03769		20.1937	1.03714		20.1937	1.1137		20.1937	1.06096		20.1937	1.04313		20.1937	1.05386		20.1937	0.972001
20.2682	1.07683		20.2682	1.08133		20.2682	1.05015		20.2682	1.06904		20.2682	1.15641		20.2682	1.10233		20.2682	1.11343		20.2682	1.09311		20.2682	1.12747		20.2682	1.04039		20.2682	1.03578		20.2682	1.11556		20.2682	1.06149		20.2682	1.04477		20.2682	1.0546		20.2682	0.973266
20.3428	1.07765		20.3428	1.08189		20.3428	1.05332		20.3428	1.07041		20.3428	1.15674		20.3428	1.10209		20.3428	1.11395		20.3428	1.09587		20.3428	1.12801		20.3428	1.03833		20.3428	1.03696		20.3428	1.11517		20.3428	1.06305		20.3428	1.04499		20.3428	1.05491		20.3428	0.973358
20.4173	1.0778		20.4173	1.08149		20.4173	1.05188		20.4173	1.07163		20.4173	1.15918		20.4173	1.10501		20.4173	1.11614		20.4173	1.09477		20.4173	1.12856		20.4173	1.03972		20.4173	1.0376		20.4173	1.1157		20.4173	1.06356		20.4173	1.04579		20.4173	1.05453		20.4173	0.974031
20.4918	1.07819		20.4918	1.08311		20.4918	1.0541		20.4918	1.07294		20.4918	1.15883		20.4918	1.10534		20.4918	1.11518		20.4918	1.09536		20.4918	1.1287		20.4918	1.03958		20.4918	1.03686		20.4918	1.11552		20.4918	1.06351		20.4918	1.04665		20.4918	1.05525		20.4918	0.975171
20.5663	1.07939		20.5663	1.08366		20.5663	1.05555		20.5663	1.07293		20.5663	1.16014		20.5663	1.10594		20.5663	1.11605		20.5663	1.09679		20.5663	1.12952		20.5663	1.04022		20.5663	1.03721		20.5663	1.11767		20.5663	1.06583		20.5663	1.04817		20.5663	1.05382		20.5663	0.97442
20.6408	1.07932		20.6408	1.08417		20.6408	1.0552		20.6408	1.0749		20.6408	1.16181		20.6408	1.10595		20.6408	1.11589		20.6408	1.09701		20.6408	1.13003		20.6408	1.03978		20.6408	1.03791		20.6408	1.11793		20.6408	1.06502		20.6408	1.04966		20.6408	1.05543		20.6408	0.973766
20.7153	1.079		20.7153	1.08632		20.7153	1.05685		20.7153	1.07618		20.7153	1.16251		20.7153	1.10619		20.7153	1.11749		20.7153	1.09852		20.7153	1.13132		20.7153	1.04067		20.7153	1.03872		20.7153	1.11869		20.7153	1.06634		20.7153	1.05034		20.7153	1.05373		20.7153	0.975461
20.7899	1.07958		20.7899	1.08708		20.7899	1.05754		20.7899	1.07516		20.7899	1.16416		20.7899	1.10801		20.7899	1.11888		20.7899	1.0992		20.7899	1.132		20.7899	1.04128		20.7899	1.03875		20.7899	1.11908		20.7899	1.06694		20.7899	1.05003		20.7899	1.05533		20.7899	0.97523
20.8644	1.0785		20.8644	1.08816		20.8644	1.06		20.8644	1.07657		20.8644	1.16426		20.8644	1.1083		20.8644	1.11841		20.8644	1.09922		20.8644	1.13261		20.8644	1.04098		20.8644	1.03945		20.8644	1.11961		20.8644	1.06589		20.8644	1.05146		20.8644	1.0543		20.8644	0.974913
20.9389	1.08353		20.9389	1.08953		20.9389	1.06006		20.9389	1.07801		20.9389	1.16515		20.9389	1.10971		20.9389	1.11934		20.9389	1.09924		20.9389	1.13204		20.9389	1.04182		20.9389	1.03956		20.9389	1.12116		20.9389	1.06834		20.9389	1.05086		20.9389	1.05559		20.9389	0.977108
21.0134	1.08933		21.0134	1.09625		21.0134	1.068		21.0134	1.0845		21.0134	1.1725		21.0134	1.11495		21.0134	1.12166		21.0134	1.10715		21.0134	1.14052		21.0134	1.05721		21.0134	1.04306		21.0134	1.13		21.0134	1.07542		21.0134	1.05934		21.0134	1.06196		21.0134	0.981956
21.0879	1.11026		21.0879	1.11709		21.0879	1.08958		21.0879	1.10748		21.0879	1.19533		21.0879	1.14		21.0879	1.1455		21.0879	1.12919		21.0879	1.16227		21.0879	1.07072		21.0879	1.06395		21.0879	1.15319		21.0879	1.09653		21.0879	1.08012		21.0879	1.08195		21.0879	1.0001
21.1624	1.12112		21.1624	1.12746		21.1624	1.09902		21.1624	1.11883		21.1624	1.206		21.1624	1.14935		21.1624	1.15793		21.1624	1.13928		21.1624	1.17269		21.1624	1.07708		21.1624	1.07442		21.1624	1.16436		21.1624	1.10594		21.1624	1.08927		21.1624	1.09185		21.1624	1.00805
21.2369	1.12876		21.2369	1.13557		21.2369	1.10442		21.2369	1.12564		21.2369	1.215		21.2369	1.15606		21.2369	1.16733		21.2369	1.14641		21.2369	1.17993		21.2369	1.08289		21.2369	1.0817		21.2369	1.17227		21.2369	1.11128		21.2369	1.09578		21.2369	1.1004		21.2369	1.01419
21.3115	1.13279		21.3115	1.1406		21.3115	1.1106		21.3115	1.13115		21.3115	1.21952		21.3115	1.16441		21.3115	1.17245		21.3115	1.15073		21.3115	1.18454		21.3115	1.08749		21.3115	1.08609		21.3115	1.17788		21.3115	1.11753		21.3115	1.10146		21.3115	1.10448		21.3115	1.01891
21.386	1.13853		21.386	1.14539		21.386	1.11593		21.386	1.13517		21.386	1.22458		21.386	1.16861		21.386	1.17687		21.386	1.1563		21.386	1.19035		21.386	1.09091		21.386	1.09051		21.386	1.18255		21.386	1.12175		21.386	1.10598		21.386	1.10817		21.386	1.02235
21.4605	1.14265		21.4605	1.14837		21.4605	1.12074		21.4605	1.13915		21.4605	1.2295		21.4605	1.1709		21.4605	1.18085		21.4605	1.15961		21.4605	1.19295		21.4605	1.09187		21.4605	1.09454		21.4605	1.18666		21.4605	1.12556		21.4605	1.10942		21.4605	1.11176		21.4605	1.02495
21.535	1.1445		21.535	1.15111		21.535	1.1234		21.535	1.14339		21.535	1.23266		21.535	1.17448		21.535	1.18422		21.535	1.16363		21.535	1.198		21.535	1.09631		21.535	1.09789		21.535	1.19108		21.535	1.13058		21.535	1.11174		21.535	1.11437		21.535	1.02692
21.6095	1.14784		21.6095	1.15543		21.6095	1.12676		21.6095	1.14831		21.6095	1.23691		21.6095	1.17716		21.6095	1.18841		21.6095	1.16606		21.6095	1.20088		21.6095	1.09858		21.6095	1.10099		21.6095	1.19491		21.6095	1.13268		21.6095	1.11462		21.6095	1.11814		21.6095	1.02995
21.684	1.15257		21.684	1.15791		21.684	1.1299		21.684	1.1506		21.684	1.23939		21.684	1.18064		21.684	1.19253		21.684	1.16917		21.684	1.20422		21.684	1.10017		21.684	1.10258		21.684	1.19757		21.684	1.13382		21.684	1.11872		21.684	1.12048		21.684	1.03289
21.7586	1.15572		21.7586	1.15837		21.7586	1.1318		21.7586	1.15227		21.7586	1.24314		21.7586	1.18617		21.7586	1.1935		21.7586	1.17147		21.7586	1.20508					21.7586	1.10594		21.7586	1.20206		21.7586	1.13707		21.7586	1.12063		21.7586	1.12449		21.7586	1.0351

## Sheet: RawData-3
Figure 1 - Figure Supplement 2d - replicate 3
NanoTemper Technologies	NanoTemper Technologies
MO.Affinity Analysis v2.3	MO.Affinity Analysis v2.3
Origin of exported data	Origin of exported data
Project Title:
Comment:
Project File Path:
Analysis-Set Name:	Analysis-Set #1
Exported from:	MST Traces
Exported on:	2023-03-15 13:37:53
Analysis Settings	Analysis Settings
Type of Analysis:	MST
Evaluation strategy:	On Time
Cold Region Start:	-1
Cold Region End:	0
Hot Region Start:	4
Hot Region End:	5
Sample Information	Sample Information		Sample Information	Sample Information		Sample Information	Sample Information		Sample Information	Sample Information		Sample Information	Sample Information		Sample Information	Sample Information		Sample Information	Sample Information		Sample Information	Sample Information		Sample Information	Sample Information		Sample Information	Sample Information		Sample Information	Sample Information		Sample Information	Sample Information		Sample Information	Sample Information		Sample Information	Sample Information		Sample Information	Sample Information		Sample Information	Sample Information
Merge-Set Name:	Experiment 10 (#10)		Merge-Set Name:	Experiment 10 (#10)		Merge-Set Name:	Experiment 10 (#10)		Merge-Set Name:	Experiment 10 (#10)		Merge-Set Name:	Experiment 10 (#10)		Merge-Set Name:	Experiment 10 (#10)		Merge-Set Name:	Experiment 10 (#10)		Merge-Set Name:	Experiment 10 (#10)		Merge-Set Name:	Experiment 10 (#10)		Merge-Set Name:	Experiment 10 (#10)		Merge-Set Name:	Experiment 10 (#10)		Merge-Set Name:	Experiment 10 (#10)		Merge-Set Name:	Experiment 10 (#10)		Merge-Set Name:	Experiment 10 (#10)		Merge-Set Name:	Experiment 10 (#10)		Merge-Set Name:	Experiment 10 (#10)
Run Name:	Experiment 10 (#10)		Run Name:	Experiment 10 (#10)		Run Name:	Experiment 10 (#10)		Run Name:	Experiment 10 (#10)		Run Name:	Experiment 10 (#10)		Run Name:	Experiment 10 (#10)		Run Name:	Experiment 10 (#10)		Run Name:	Experiment 10 (#10)		Run Name:	Experiment 10 (#10)		Run Name:	Experiment 10 (#10)		Run Name:	Experiment 10 (#10)		Run Name:	Experiment 10 (#10)		Run Name:	Experiment 10 (#10)		Run Name:	Experiment 10 (#10)		Run Name:	Experiment 10 (#10)		Run Name:	Experiment 10 (#10)
Date of Measurement:	2022-05-26 23:39:40		Date of Measurement:	2022-05-26 23:38:59		Date of Measurement:	2022-05-26 23:38:19		Date of Measurement:	2022-05-26 23:37:39		Date of Measurement:	2022-05-26 23:36:58		Date of Measurement:	2022-05-26 23:36:18		Date of Measurement:	2022-05-26 23:35:37		Date of Measurement:	2022-05-26 23:34:57		Date of Measurement:	2022-05-26 23:34:16		Date of Measurement:	2022-05-26 23:33:36		Date of Measurement:	2022-05-26 23:32:55		Date of Measurement:	2022-05-26 23:32:14		Date of Measurement:	2022-05-26 23:31:34		Date of Measurement:	2022-05-26 23:30:54		Date of Measurement:	2022-05-26 23:30:13		Date of Measurement:	2022-05-26 23:29:33
Capillary Type:	Monolith NT.115 Premium Capillary		Capillary Type:	Monolith NT.115 Premium Capillary		Capillary Type:	Monolith NT.115 Premium Capillary		Capillary Type:	Monolith NT.115 Premium Capillary		Capillary Type:	Monolith NT.115 Premium Capillary		Capillary Type:	Monolith NT.115 Premium Capillary		Capillary Type:	Monolith NT.115 Premium Capillary		Capillary Type:	Monolith NT.115 Premium Capillary		Capillary Type:	Monolith NT.115 Premium Capillary		Capillary Type:	Monolith NT.115 Premium Capillary		Capillary Type:	Monolith NT.115 Premium Capillary		Capillary Type:	Monolith NT.115 Premium Capillary		Capillary Type:	Monolith NT.115 Premium Capillary		Capillary Type:	Monolith NT.115 Premium Capillary		Capillary Type:	Monolith NT.115 Premium Capillary		Capillary Type:	Monolith NT.115 Premium Capillary
Capillary Position:	16		Capillary Position:	15		Capillary Position:	14		Capillary Position:	13		Capillary Position:	12		Capillary Position:	11		Capillary Position:	10		Capillary Position:	9		Capillary Position:	8		Capillary Position:	7		Capillary Position:	6		Capillary Position:	5		Capillary Position:	4		Capillary Position:	3		Capillary Position:	2		Capillary Position:	1
Ligand:	penicillin		Ligand:	penicillin		Ligand:	penicillin		Ligand:	penicillin		Ligand:	penicillin		Ligand:	penicillin		Ligand:	penicillin		Ligand:	penicillin		Ligand:	penicillin		Ligand:	penicillin		Ligand:	penicillin		Ligand:	penicillin		Ligand:	penicillin		Ligand:	penicillin		Ligand:	penicillin		Ligand:	penicillin
Ligand Concentration:	3.05176e-07		Ligand Concentration:	6.10352e-07		Ligand Concentration:	1.2207e-06		Ligand Concentration:	2.44141e-06		Ligand Concentration:	4.88281e-06		Ligand Concentration:	9.76563e-06		Ligand Concentration:	1.95313e-05		Ligand Concentration:	3.90625e-05		Ligand Concentration:	7.8125e-05		Ligand Concentration:	0.00015625		Ligand Concentration:	0.0003125		Ligand Concentration:	0.000625		Ligand Concentration:	0.00125		Ligand Concentration:	0.0025		Ligand Concentration:	0.005		Ligand Concentration:	0.01
Target:	DltE		Target:	DltE		Target:	DltE		Target:	DltE		Target:	DltE		Target:	DltE		Target:	DltE		Target:	DltE		Target:	DltE		Target:	DltE		Target:	DltE		Target:	DltE		Target:	DltE		Target:	DltE		Target:	DltE		Target:	DltE
TargetConcentration:	2e-08		TargetConcentration:	2e-08		TargetConcentration:	2e-08		TargetConcentration:	2e-08		TargetConcentration:	2e-08		TargetConcentration:	2e-08		TargetConcentration:	2e-08		TargetConcentration:	2e-08		TargetConcentration:	2e-08		TargetConcentration:	2e-08		TargetConcentration:	2e-08		TargetConcentration:	2e-08		TargetConcentration:	2e-08		TargetConcentration:	2e-08		TargetConcentration:	2e-08		TargetConcentration:	2e-08
Measurement Settings	Measurement Settings		Measurement Settings	Measurement Settings		Measurement Settings	Measurement Settings		Measurement Settings	Measurement Settings		Measurement Settings	Measurement Settings		Measurement Settings	Measurement Settings		Measurement Settings	Measurement Settings		Measurement Settings	Measurement Settings		Measurement Settings	Measurement Settings		Measurement Settings	Measurement Settings		Measurement Settings	Measurement Settings		Measurement Settings	Measurement Settings		Measurement Settings	Measurement Settings		Measurement Settings	Measurement Settings		Measurement Settings	Measurement Settings		Measurement Settings	Measurement Settings
MST-Power:	Medium		MST-Power:	Medium		MST-Power:	Medium		MST-Power:	Medium		MST-Power:	Medium		MST-Power:	Medium		MST-Power:	Medium		MST-Power:	Medium		MST-Power:	Medium		MST-Power:	Medium		MST-Power:	Medium		MST-Power:	Medium		MST-Power:	Medium		MST-Power:	Medium		MST-Power:	Medium		MST-Power:	Medium
Excitation-Power:	80		Excitation-Power:	80		Excitation-Power:	80		Excitation-Power:	80		Excitation-Power:	80		Excitation-Power:	80		Excitation-Power:	80		Excitation-Power:	80		Excitation-Power:	80		Excitation-Power:	80		Excitation-Power:	80		Excitation-Power:	80		Excitation-Power:	80		Excitation-Power:	80		Excitation-Power:	80		Excitation-Power:	80
Excitation type:	Nano - RED		Excitation type:	Nano - RED		Excitation type:	Nano - RED		Excitation type:	Nano - RED		Excitation type:	Nano - RED		Excitation type:	Nano - RED		Excitation type:	Nano - RED		Excitation type:	Nano - RED		Excitation type:	Nano - RED		Excitation type:	Nano - RED		Excitation type:	Nano - RED		Excitation type:	Nano - RED		Excitation type:	Nano - RED		Excitation type:	Nano - RED		Excitation type:	Nano - RED		Excitation type:	Nano - RED
Thermostat Setpoint:	22		Thermostat Setpoint:	22		Thermostat Setpoint:	22		Thermostat Setpoint:	22		Thermostat Setpoint:	22		Thermostat Setpoint:	22		Thermostat Setpoint:	22		Thermostat Setpoint:	22		Thermostat Setpoint:	22		Thermostat Setpoint:	22		Thermostat Setpoint:	22		Thermostat Setpoint:	22		Thermostat Setpoint:	22		Thermostat Setpoint:	22		Thermostat Setpoint:	22		Thermostat Setpoint:	22
Included	Included		Included	Included		Included	Included		Included	Included		Included	Included		Included	Included		Included	Included		Included	Included		Included	Included		Included	Included		Included	Included		Included	Included		Included	Included		Included	Included		Included	Included		Included	Included
Time [s]	Normalized Fluorescence [-]		Time [s]	Normalized Fluorescence [-]		Time [s]	Normalized Fluorescence [-]		Time [s]	Normalized Fluorescence [-]		Time [s]	Normalized Fluorescence [-]		Time [s]	Normalized Fluorescence [-]		Time [s]	Normalized Fluorescence [-]		Time [s]	Normalized Fluorescence [-]		Time [s]	Normalized Fluorescence [-]		Time [s]	Normalized Fluorescence [-]		Time [s]	Normalized Fluorescence [-]		Time [s]	Normalized Fluorescence [-]		Time [s]	Normalized Fluorescence [-]		Time [s]	Normalized Fluorescence [-]		Time [s]	Normalized Fluorescence [-]		Time [s]	Normalized Fluorescence [-]
-3.57675	0.999285		-3.57675	0.999784		-3.57675	0.999081		-3.57675	1.00028		-3.57675	1.00053		-3.57675	0.999361		-3.57675	0.999609		-3.57675	1.00032		-3.57675	1.0011		-3.57675	0.999976		-3.57675	1.00012		-3.57675	0.999843		-3.57675	1.00014		-3.57675	1.00005		-3.57675	0.999855		-3.57675	0.999998
-3.50223	1.00003		-3.50223	1.00009		-3.50223	0.999446		-3.50223	0.999978		-3.50223	0.999526		-3.50223	0.999629		-3.50223	0.999977		-3.50223	1.00043		-3.50223	1.00052		-3.50223	0.999545		-3.50223	0.999841		-3.50223	0.999714		-3.50223	1.00026		-3.50223	0.999469		-3.50223	0.999302		-3.50223	0.999666
-3.42772	0.999918		-3.42772	0.99903		-3.42772	1.00008		-3.42772	1.00045		-3.42772	0.999505		-3.42772	1.00074		-3.42772	1.00005		-3.42772	0.999224		-3.42772	0.99991		-3.42772	1.00032		-3.42772	0.999839		-3.42772	0.999752		-3.42772	0.999834		-3.42772	1.00073		-3.42772	1.00026		-3.42772	1.00132
-3.3532	0.99933		-3.3532	0.999904		-3.3532	1.00016		-3.3532	1.00003		-3.3532	0.999869		-3.3532	1.00096		-3.3532	1.00038		-3.3532	0.999521		-3.3532	1.0002		-3.3532	0.999622		-3.3532	0.999929		-3.3532	0.999977		-3.3532	0.9992		-3.3532	1.00009		-3.3532	1.00016		-3.3532	0.999689
-3.27869	1.00046		-3.27869	0.99995		-3.27869	0.999166		-3.27869	0.998853		-3.27869	0.999505		-3.27869	0.999546		-3.27869	1.00001		-3.27869	0.998673		-3.27869	0.999182		-3.27869	0.999749		-3.27869	0.99927		-3.27869	1.00042		-3.27869	1.00021		-3.27869	0.999216		-3.27869	0.999895		-3.27869	0.999711
-3.20417	0.998683		-3.20417	0.999197		-3.20417	1.0002		-3.20417	0.999963		-3.20417	0.999779		-3.20417	0.99979		-3.20417	0.998931		-3.20417	0.998759		-3.20417	0.999404		-3.20417	0.999958		-3.20417	1.00046		-3.20417	0.998716		-3.20417	1		-3.20417	0.999395		-3.20417	0.999722		-3.20417	0.999428
-3.12966	0.998881		-3.12966	0.999904		-3.12966	0.999229		-3.12966	0.998853		-3.12966	0.998933		-3.12966	0.999262		-3.12966	0.999195		-3.12966	0.999385		-3.12966	0.998892		-3.12966	0.998643		-3.12966	0.998378		-3.12966	0.999538		-3.12966	0.999357		-3.12966	0.999081		-3.12966	0.999845		-3.12966	0.999283
-3.05514	0.999279		-3.05514	0.998029		-3.05514	0.999101		-3.05514	0.998451		-3.05514	0.998668		-3.05514	0.999676		-3.05514	0.99888		-3.05514	0.999943		-3.05514	0.998726		-3.05514	0.999488		-3.05514	0.999428		-3.05514	0.999132		-3.05514	0.999807		-3.05514	0.999399		-3.05514	0.999452		-3.05514	0.99881
-2.98062	0.999202		-2.98062	0.998463		-2.98062	0.999814		-2.98062	0.999364		-2.98062	0.999528		-2.98062	0.999594		-2.98062	0.998724		-2.98062	0.999446		-2.98062	0.998688		-2.98062	0.998669		-2.98062	0.999378		-2.98062	0.999062		-2.98062	0.999356		-2.98062	0.999688		-2.98062	0.999847		-2.98062	0.999756
-2.90611	0.999261		-2.90611	0.998688		-2.90611	0.999696		-2.90611	0.998611		-2.90611	0.998246		-2.90611	0.998664		-2.90611	0.99879		-2.90611	0.998993		-2.90611	0.999007		-2.90611	0.99927		-2.90611	0.999484		-2.90611	0.998828		-2.90611	0.999326		-2.90611	1.00013		-2.90611	0.997954		-2.90611	0.998542
-2.83159	0.99863		-2.83159	0.999005		-2.83159	0.998426		-2.83159	0.998487		-2.83159	0.998541		-2.83159	0.998764		-2.83159	0.998899		-2.83159	0.999324		-2.83159	0.998307		-2.83159	0.997443		-2.83159	0.998407		-2.83159	0.998745		-2.83159	0.998417		-2.83159	0.999678		-2.83159	0.999684		-2.83159	0.999815
-2.75708	0.998568		-2.75708	0.998598		-2.75708	0.999104		-2.75708	0.998628		-2.75708	0.999045		-2.75708	0.998964		-2.75708	0.999238		-2.75708	0.999026		-2.75708	0.998588		-2.75708	0.998608		-2.75708	0.998506		-2.75708	0.999238		-2.75708	0.999029		-2.75708	0.999205		-2.75708	0.999066		-2.75708	0.999443
-2.68256	0.998743		-2.68256	0.999339		-2.68256	0.998976		-2.68256	0.997944		-2.68256	0.998935		-2.68256	0.998309		-2.68256	0.998777		-2.68256	0.997392		-2.68256	0.998383		-2.68256	0.999019		-2.68256	0.998959		-2.68256	0.998575		-2.68256	0.999304		-2.68256	0.998748		-2.68256	0.99899		-2.68256	0.998791
-2.60805	0.998331		-2.60805	0.998325		-2.60805	0.998469		-2.60805	0.998719		-2.60805	0.997885		-2.60805	0.997949		-2.60805	0.998175		-2.60805	0.999707		-2.60805	0.998125		-2.60805	0.998622		-2.60805	0.99858		-2.60805	0.998436		-2.60805	0.998822		-2.60805	0.998316		-2.60805	0.998186		-2.60805	0.998702
-2.53353	0.998355		-2.53353	0.998036		-2.53353	0.998369		-2.53353	0.998443		-2.53353	0.998206		-2.53353	0.998596		-2.53353	0.997928		-2.53353	0.997658		-2.53353	0.99917		-2.53353	0.998962		-2.53353	0.998016		-2.53353	0.997974		-2.53353	0.998311		-2.53353	0.998056		-2.53353	0.998442		-2.53353	0.998966
-2.45901	0.998505		-2.45901	0.998256		-2.45901	0.997873		-2.45901	0.998815		-2.45901	0.997335		-2.45901	0.998573		-2.45901	0.998186		-2.45901	0.998045		-2.45901	0.998525		-2.45901	0.998249		-2.45901	0.998386		-2.45901	0.999572		-2.45901	0.998426		-2.45901	0.998395		-2.45901	0.997763		-2.45901	0.999506
-2.3845	0.997134		-2.3845	0.999078		-2.3845	0.999174		-2.3845	0.998554		-2.3845	0.998183		-2.3845	0.997423		-2.3845	0.997799		-2.3845	0.99852		-2.3845	0.997525		-2.3845	0.999285		-2.3845	0.998727		-2.3845	0.998834		-2.3845	0.998672		-2.3845	0.998899		-2.3845	0.99905		-2.3845	0.998482
-2.30998	0.998018		-2.30998	0.998582		-2.30998	0.998611		-2.30998	0.997631		-2.30998	0.998895		-2.30998	0.999133		-2.30998	0.997419		-2.30998	0.998364		-2.30998	0.997854		-2.30998	0.99764		-2.30998	0.998573		-2.30998	0.997485		-2.30998	0.99824		-2.30998	0.99836		-2.30998	0.998648		-2.30998	0.998058
-2.23547	0.997919		-2.23547	0.997755		-2.23547	0.999366		-2.23547	0.998218		-2.23547	0.999207		-2.23547	0.99849		-2.23547	0.997698		-2.23547	0.998337		-2.23547	0.99748		-2.23547	0.998512		-2.23547	0.998497		-2.23547	0.998196		-2.23547	0.998675		-2.23547	0.997787		-2.23547	0.998102		-2.23547	0.998255
-2.16095	0.997571		-2.16095	0.998242		-2.16095	0.998764		-2.16095	0.997598		-2.16095	0.997147		-2.16095	0.99799		-2.16095	0.997894		-2.16095	0.996791		-2.16095	0.997414		-2.16095	0.998741		-2.16095	0.998261		-2.16095	0.99877		-2.16095	0.998369		-2.16095	0.998488		-2.16095	0.998176		-2.16095	0.999778
-2.08644	0.998125		-2.08644	0.997916		-2.08644	0.998716		-2.08644	0.998599		-2.08644	0.998138		-2.08644	0.997397		-2.08644	0.998397		-2.08644	0.997852		-2.08644	0.997702		-2.08644	0.998317		-2.08644	0.998356		-2.08644	0.998225		-2.08644	0.997896		-2.08644	0.998333		-2.08644	0.997399		-2.08644	0.99881
-2.01192	0.997943		-2.01192	0.997643		-2.01192	0.997931		-2.01192	0.997581		-2.01192	0.99806		-2.01192	0.997509		-2.01192	0.998007		-2.01192	0.998459		-2.01192	0.997541		-2.01192	0.998237		-2.01192	0.999022		-2.01192	0.998389		-2.01192	0.998683		-2.01192	0.998306		-2.01192	0.998888		-2.01192	0.997298
-1.93741	0.997917		-1.93741	0.997717		-1.93741	0.998596		-1.93741	0.996674		-1.93741	0.997209		-1.93741	0.997701		-1.93741	0.997259		-1.93741	0.997266		-1.93741	0.997962		-1.93741	0.997509		-1.93741	0.997976		-1.93741	0.996995		-1.93741	0.998048		-1.93741	0.998428		-1.93741	0.997267		-1.93741	0.99776
-1.86289	0.99771		-1.86289	0.998921		-1.86289	0.997391		-1.86289	0.997447		-1.86289	0.997993		-1.86289	0.997403		-1.86289	0.997486		-1.86289	0.997157		-1.86289	0.997442		-1.86289	0.997754		-1.86289	0.998841		-1.86289	0.997697		-1.86289	0.998309		-1.86289	0.998305		-1.86289	0.998022		-1.86289	0.997939
-1.78837	0.997565		-1.78837	0.99719		-1.78837	0.997133		-1.78837	0.997295		-1.78837	0.998526		-1.78837	0.996807		-1.78837	0.997576		-1.78837	0.99783		-1.78837	0.997986		-1.78837	0.997888		-1.78837	0.997799		-1.78837	0.998001		-1.78837	0.998032		-1.78837	0.998102		-1.78837	0.998286		-1.78837	0.998344
-1.71386	0.997617		-1.71386	0.996858		-1.71386	0.996821		-1.71386	0.996089		-1.71386	0.997008		-1.71386	0.996733		-1.71386	0.997351		-1.71386	0.997753		-1.71386	0.998549		-1.71386	0.996928		-1.71386	0.997236		-1.71386	0.997521		-1.71386	0.997965		-1.71386	0.997888		-1.71386	0.997267		-1.71386	0.999555
-1.63934	0.997947		-1.63934	0.997643		-1.63934	0.996803		-1.63934	0.996844		-1.63934	0.997171		-1.63934	0.996185		-1.63934	0.9964		-1.63934	0.996863		-1.63934	0.997038		-1.63934	0.997091		-1.63934	0.997373		-1.63934	0.997077		-1.63934	0.997248		-1.63934	0.997656		-1.63934	0.997287		-1.63934	0.998661
-1.56483	0.996196		-1.56483	0.997017		-1.56483	0.997546		-1.56483	0.997443		-1.56483	0.997108		-1.56483	0.996716		-1.56483	0.996951		-1.56483	0.996751		-1.56483	0.99677		-1.56483	0.997146		-1.56483	0.996949		-1.56483	0.998498		-1.56483	0.998044		-1.56483	0.997079		-1.56483	0.997629		-1.56483	0.998099
-1.49031	0.997247		-1.49031	0.996233		-1.49031	0.996951		-1.49031	0.996278		-1.49031	0.997272		-1.49031	0.997262		-1.49031	0.995562		-1.49031	0.996861		-1.49031	0.996851		-1.49031	0.996609		-1.49031	0.99779		-1.49031	0.997467		-1.49031	0.998062		-1.49031	0.998333		-1.49031	0.997457		-1.49031	0.996591
-1.4158	0.998242		-1.4158	0.99661		-1.4158	0.997446		-1.4158	0.997121		-1.4158	0.99696		-1.4158	0.998616		-1.4158	0.997074		-1.4158	0.996363		-1.4158	0.99748		-1.4158	0.997137		-1.4158	0.997228		-1.4158	0.996033		-1.4158	0.997667		-1.4158	0.997619		-1.4158	0.997291		-1.4158	0.998683
-1.34128	0.995935		-1.34128	0.99695		-1.34128	0.997426		-1.34128	0.997194		-1.34128	0.995941		-1.34128	0.996696		-1.34128	0.996668		-1.34128	0.995893		-1.34128	0.996498		-1.34128	0.996772		-1.34128	0.996035		-1.34128	0.99698		-1.34128	0.997252		-1.34128	0.997853		-1.34128	0.997333		-1.34128	0.997644
-1.26677	0.996712		-1.26677	0.997086		-1.26677	0.996333		-1.26677	0.996263		-1.26677	0.996812		-1.26677	0.996829		-1.26677	0.996718		-1.26677	0.996309		-1.26677	0.995719		-1.26677	0.996663		-1.26677	0.997259		-1.26677	0.997498		-1.26677	0.997264		-1.26677	0.997853		-1.26677	0.997453		-1.26677	0.996594
-1.19225	0.996358		-1.19225	0.996624		-1.19225	0.997596		-1.19225	0.995918		-1.19225	0.9967		-1.19225	0.996492		-1.19225	0.995926		-1.19225	0.996137		-1.19225	0.997504		-1.19225	0.996811		-1.19225	0.996905		-1.19225	0.996866		-1.19225	0.99723		-1.19225	0.997289		-1.19225	0.997479		-1.19225	0.99751
-1.11773	0.996139		-1.11773	0.996525		-1.11773	0.996703		-1.11773	0.995706		-1.11773	0.996471		-1.11773	0.997644		-1.11773	0.995776		-1.11773	0.996366		-1.11773	0.996127		-1.11773	0.995343		-1.11773	0.996483		-1.11773	0.997094		-1.11773	0.996752		-1.11773	0.99743		-1.11773	0.99799		-1.11773	0.99614
-1.04322	0.996127		-1.04322	0.996744		-1.04322	0.997411		-1.04322	0.995492		-1.04322	0.995933		-1.04322	0.99661		-1.04322	0.996116		-1.04322	0.996494		-1.04322	0.996146		-1.04322	0.99666		-1.04322	0.99631		-1.04322	0.996787		-1.04322	0.997443		-1.04322	0.997813		-1.04322	0.997539		-1.04322	0.99795
-0.968703	0.995347		-0.968703	0.997099		-0.968703	0.996046		-0.968703	0.995932		-0.968703	0.995663		-0.968703	0.996636		-0.968703	0.995807		-0.968703	0.996087		-0.968703	0.995983		-0.968703	0.996499		-0.968703	0.996518		-0.968703	0.995669		-0.968703	0.996986		-0.968703	0.996548		-0.968703	0.998146		-0.968703	0.996431
-0.894187	0.996394		-0.894187	0.996622		-0.894187	0.996301		-0.894187	0.995708		-0.894187	0.995996		-0.894187	0.995573		-0.894187	0.996141		-0.894187	0.996029		-0.894187	0.996576		-0.894187	0.996937		-0.894187	0.996693		-0.894187	0.996419		-0.894187	0.996929		-0.894187	0.996626		-0.894187	0.997373		-0.894187	0.997704
-0.819672	0.997276		-0.819672	0.996211		-0.819672	0.995861		-0.819672	0.995549		-0.819672	0.995834		-0.819672	0.995881		-0.819672	0.995829		-0.819672	0.996858		-0.819672	0.996463		-0.819672	0.996806		-0.819672	0.996385		-0.819672	0.996338		-0.819672	0.996561		-0.819672	0.996829		-0.819672	0.997239		-0.819672	0.997425
-0.745156	0.995399		-0.745156	0.995762		-0.745156	0.995738		-0.745156	0.996064		-0.745156	0.996095		-0.745156	0.996568		-0.745156	0.996033		-0.745156	0.994881		-0.745156	0.996477		-0.745156	0.996593		-0.745156	0.996362		-0.745156	0.997386		-0.745156	0.997183		-0.745156	0.997169		-0.745156	0.996711		-0.745156	0.997845
-0.67064	0.995234		-0.67064	0.995035		-0.67064	0.995986		-0.67064	0.995993		-0.67064	0.995478		-0.67064	0.994512		-0.67064	0.995578		-0.67064	0.995479		-0.67064	0.99555		-0.67064	0.996048		-0.67064	0.996187		-0.67064	0.996091		-0.67064	0.996941		-0.67064	0.996436		-0.67064	0.997015		-0.67064	0.997924
-0.596125	0.995484		-0.596125	0.995451		-0.596125	0.995981		-0.596125	0.995666		-0.596125	0.995629		-0.596125	0.995814		-0.596125	0.995977		-0.596125	0.99544		-0.596125	0.995664		-0.596125	0.995624		-0.596125	0.996666		-0.596125	0.996299		-0.596125	0.99677		-0.596125	0.997188		-0.596125	0.996733		-0.596125	0.996405
-0.521609	0.995658		-0.521609	0.995047		-0.521609	0.995633		-0.521609	0.996531		-0.521609	0.995568		-0.521609	0.995947		-0.521609	0.994847		-0.521609	0.995233		-0.521609	0.99486		-0.521609	0.995926		-0.521609	0.996747		-0.521609	0.99639		-0.521609	0.997033		-0.521609	0.996812		-0.521609	0.995793		-0.521609	0.997872
-0.447094	0.995023		-0.447094	0.995608		-0.447094	0.996391		-0.447094	0.994533		-0.447094	0.994525		-0.447094	0.995586		-0.447094	0.995133		-0.447094	0.994972		-0.447094	0.995574		-0.447094	0.995707		-0.447094	0.996588		-0.447094	0.996153		-0.447094	0.996558		-0.447094	0.996509		-0.447094	0.997155		-0.447094	0.995693
-0.372578	0.995189		-0.372578	0.995404		-0.372578	0.996951		-0.372578	0.994182		-0.372578	0.995336		-0.372578	0.995873		-0.372578	0.995116		-0.372578	0.995965		-0.372578	0.995929		-0.372578	0.995675		-0.372578	0.996221		-0.372578	0.995066		-0.372578	0.995972		-0.372578	0.996987		-0.372578	0.995218		-0.372578	0.995976
-0.298063	0.994827		-0.298063	0.995318		-0.298063	0.996193		-0.298063	0.995294		-0.298063	0.994733		-0.298063	0.996112		-0.298063	0.994585		-0.298063	0.994347		-0.298063	0.994813		-0.298063	0.995466		-0.298063	0.996016		-0.298063	0.995493		-0.298063	0.996519		-0.298063	0.996232		-0.298063	0.99522		-0.298063	0.997719
-0.223547	0.995112		-0.223547	0.995535		-0.223547	0.996251		-0.223547	0.995568		-0.223547	0.995735		-0.223547	0.995707		-0.223547	0.995345		-0.223547	0.994873		-0.223547	0.995373		-0.223547	0.995744		-0.223547	0.995937		-0.223547	0.995499		-0.223547	0.996374		-0.223547	0.995485		-0.223547	0.996019		-0.223547	0.997518
-0.149031	0.99487		-0.149031	0.995285		-0.149031	0.996008		-0.149031	0.994655		-0.149031	0.99595		-0.149031	0.995783		-0.149031	0.994404		-0.149031	0.99514		-0.149031	0.99551		-0.149031	0.995358		-0.149031	0.995132		-0.149031	0.996423		-0.149031	0.996296		-0.149031	0.996506		-0.149031	0.996473		-0.149031	0.996133
-0.0745156	0.994269		-0.0745156	0.994461		-0.0745156	0.995678		-0.0745156	0.995107		-0.0745156	0.995033		-0.0745156	0.996147		-0.0745156	0.995224		-0.0745156	0.994951		-0.0745156	0.995042		-0.0745156	0.994159		-0.0745156	0.995815		-0.0745156	0.994846		-0.0745156	0.996062		-0.0745156	0.996284		-0.0745156	0.995556		-0.0745156	0.996125
0	0.993228		0	0.992905		0	0.994256		0	0.992994		0	0.992779		0	0.993518		0	0.992905		0	0.994074		0	0.993085		0	0.994389		0	0.994248		0	0.994001		0	0.995718		0	0.995483		0	0.994468		0	0.996092
0.0745156	0.971953		0.0745156	0.971448		0.0745156	0.972127		0.0745156	0.9713		0.0745156	0.971743		0.0745156	0.971544		0.0745156	0.970553		0.0745156	0.970736		0.0745156	0.971279		0.0745156	0.973142		0.0745156	0.972934		0.0745156	0.972837		0.0745156	0.976183		0.0745156	0.974385		0.0745156	0.974122		0.0745156	0.975148
0.149031	0.959913		0.149031	0.959487		0.149031	0.960474		0.149031	0.960393		0.149031	0.959732		0.149031	0.960093		0.149031	0.959292		0.149031	0.960609		0.149031	0.960335		0.149031	0.961731		0.149031	0.961707		0.149031	0.96181		0.149031	0.963697		0.149031	0.96276		0.149031	0.961387		0.149031	0.963047
0.223547	0.953846		0.223547	0.954117		0.223547	0.953038		0.223547	0.953989		0.223547	0.954073		0.223547	0.953593		0.223547	0.952979		0.223547	0.952372		0.223547	0.954313		0.223547	0.954396		0.223547	0.953424		0.223547	0.955198		0.223547	0.956133		0.223547	0.955466		0.223547	0.95531		0.223547	0.956285
0.298062	0.948569		0.298062	0.947619		0.298062	0.949203		0.298062	0.947553		0.298062	0.948304		0.298062	0.948641		0.298062	0.947543		0.298062	0.947452		0.298062	0.949279		0.298062	0.949209		0.298062	0.949232		0.298062	0.951212		0.298062	0.950098		0.298062	0.950737		0.298062	0.949922		0.298062	0.950045
0.372578	0.944177		0.372578	0.944453		0.372578	0.94597		0.372578	0.944127		0.372578	0.944372		0.372578	0.94469		0.372578	0.943692		0.372578	0.944373		0.372578	0.943985		0.372578	0.944823		0.372578	0.945626		0.372578	0.946645		0.372578	0.946575		0.372578	0.945603		0.372578	0.946226		0.372578	0.947781
0.447093	0.94019		0.447093	0.939318		0.447093	0.942075		0.447093	0.941132		0.447093	0.940722		0.447093	0.941257		0.447093	0.940537		0.447093	0.94076		0.447093	0.940197		0.447093	0.94138		0.447093	0.940525		0.447093	0.943258		0.447093	0.941901		0.447093	0.941875		0.447093	0.941323		0.447093	0.942561
0.521609	0.936919		0.521609	0.936514		0.521609	0.938487		0.521609	0.93737		0.521609	0.937225		0.521609	0.937918		0.521609	0.936709		0.521609	0.938667		0.521609	0.938858		0.521609	0.937881		0.521609	0.937153		0.521609	0.939249		0.521609	0.938556		0.521609	0.93809		0.521609	0.93842		0.521609	0.940576
0.596125	0.934044		0.596125	0.933778		0.596125	0.935517		0.596125	0.935069		0.596125	0.934587		0.596125	0.93533		0.596125	0.933339		0.596125	0.934354		0.596125	0.9353		0.596125	0.934686		0.596125	0.934421		0.596125	0.935974		0.596125	0.936702		0.596125	0.935612		0.596125	0.93554		0.596125	0.935937
0.67064	0.930666		0.67064	0.930878		0.67064	0.933019		0.67064	0.931457		0.67064	0.931001		0.67064	0.932238		0.67064	0.932063		0.67064	0.932362		0.67064	0.931735		0.67064	0.932063		0.67064	0.932266		0.67064	0.934313		0.67064	0.93288		0.67064	0.932678		0.67064	0.932289		0.67064	0.93412
0.745156	0.929408		0.745156	0.928783		0.745156	0.929964		0.745156	0.929424		0.745156	0.929694		0.745156	0.929326		0.745156	0.929406		0.745156	0.929656		0.745156	0.929867		0.745156	0.929836		0.745156	0.929462		0.745156	0.931647		0.745156	0.930647		0.745156	0.930325		0.745156	0.930236		0.745156	0.931949
0.819672	0.927091		0.819672	0.925941		0.819672	0.927529		0.819672	0.92693		0.819672	0.926436		0.819672	0.926824		0.819672	0.926281		0.819672	0.927615		0.819672	0.927587		0.819672	0.926547		0.819672	0.927965		0.819672	0.929275		0.819672	0.928135		0.819672	0.928632		0.819672	0.927583		0.819672	0.931134
0.894187	0.924513		0.894187	0.924572		0.894187	0.926464		0.894187	0.924477		0.894187	0.924001		0.894187	0.924985		0.894187	0.92413		0.894187	0.925294		0.894187	0.926682		0.894187	0.924251		0.894187	0.925887		0.894187	0.927556		0.894187	0.925808		0.894187	0.926448		0.894187	0.925507		0.894187	0.925251
0.968703	0.921998		0.968703	0.921642		0.968703	0.923954		0.968703	0.921104		0.968703	0.922582		0.968703	0.923776		0.968703	0.921853		0.968703	0.92379		0.968703	0.923547		0.968703	0.922523		0.968703	0.923432		0.968703	0.925312		0.968703	0.923656		0.968703	0.923691		0.968703	0.923288		0.968703	0.924923
1.04322	0.919914		1.04322	0.919746		1.04322	0.922531		1.04322	0.920227		1.04322	0.920526		1.04322	0.921615		1.04322	0.919591		1.04322	0.921452		1.04322	0.921794		1.04322	0.921049		1.04322	0.921709		1.04322	0.924191		1.04322	0.922044		1.04322	0.922015		1.04322	0.921069		1.04322	0.922343
1.11773	0.918402		1.11773	0.917677		1.11773	0.920249		1.11773	0.918509		1.11773	0.918412		1.11773	0.919081		1.11773	0.918679		1.11773	0.919403		1.11773	0.919983		1.11773	0.919886		1.11773	0.920414		1.11773	0.92159		1.11773	0.919848		1.11773	0.919502		1.11773	0.919949		1.11773	0.920749
1.19225	0.916374		1.19225	0.916511		1.19225	0.918868		1.19225	0.916841		1.19225	0.916934		1.19225	0.91857		1.19225	0.916877		1.19225	0.917731		1.19225	0.91905		1.19225	0.916674		1.19225	0.91908		1.19225	0.920154		1.19225	0.918649		1.19225	0.918302		1.19225	0.917035		1.19225	0.918731
1.26677	0.914823		1.26677	0.914521		1.26677	0.916348		1.26677	0.915973		1.26677	0.915015		1.26677	0.915557		1.26677	0.915611		1.26677	0.916226		1.26677	0.916453		1.26677	0.915516		1.26677	0.91672		1.26677	0.918712		1.26677	0.916949		1.26677	0.916112		1.26677	0.915981		1.26677	0.916892
1.34128	0.913369		1.34128	0.913364		1.34128	0.913613		1.34128	0.915397		1.34128	0.914039		1.34128	0.914446		1.34128	0.914359		1.34128	0.915376		1.34128	0.915049		1.34128	0.913452		1.34128	0.914871		1.34128	0.918801		1.34128	0.914924		1.34128	0.914886		1.34128	0.915046		1.34128	0.916132
1.4158	0.911273		1.4158	0.91177		1.4158	0.913923		1.4158	0.912358		1.4158	0.91219		1.4158	0.913245		1.4158	0.912386		1.4158	0.913379		1.4158	0.914935		1.4158	0.912878		1.4158	0.914398		1.4158	0.91586		1.4158	0.914142		1.4158	0.913465		1.4158	0.912987		1.4158	0.914301
1.49031	0.910913		1.49031	0.909529		1.49031	0.911388		1.49031	0.911067		1.49031	0.911409		1.49031	0.912416		1.49031	0.910686		1.49031	0.91232		1.49031	0.912739		1.49031	0.911715		1.49031	0.912676		1.49031	0.914868		1.49031	0.91259		1.49031	0.912254		1.49031	0.912277		1.49031	0.912826
1.56483	0.908792		1.56483	0.909346		1.56483	0.910958		1.56483	0.910094		1.56483	0.90892		1.56483	0.910845		1.56483	0.909125		1.56483	0.912245		1.56483	0.911147		1.56483	0.909684		1.56483	0.911006		1.56483	0.914033		1.56483	0.911415		1.56483	0.910935		1.56483	0.909948		1.56483	0.911333
1.63934	0.908551		1.63934	0.907219		1.63934	0.90993		1.63934	0.907731		1.63934	0.907981		1.63934	0.908517		1.63934	0.907725		1.63934	0.909351		1.63934	0.909616		1.63934	0.908401		1.63934	0.909265		1.63934	0.912235		1.63934	0.910744		1.63934	0.910171		1.63934	0.909095		1.63934	0.910853
1.71386	0.907173		1.71386	0.906669		1.71386	0.909293		1.71386	0.907179		1.71386	0.906484		1.71386	0.908127		1.71386	0.906759		1.71386	0.90864		1.71386	0.908753		1.71386	0.906991		1.71386	0.909066		1.71386	0.911655		1.71386	0.908653		1.71386	0.908371		1.71386	0.907635		1.71386	0.908421
1.78837	0.905836		1.78837	0.904832		1.78837	0.907713		1.78837	0.906346		1.78837	0.905991		1.78837	0.907438		1.78837	0.905982		1.78837	0.907241		1.78837	0.908157		1.78837	0.906036		1.78837	0.908027		1.78837	0.910418		1.78837	0.907704		1.78837	0.906995		1.78837	0.906582		1.78837	0.906872
1.86289	0.905007		1.86289	0.904156		1.86289	0.906453		1.86289	0.905002		1.86289	0.903998		1.86289	0.906199		1.86289	0.90554		1.86289	0.906552		1.86289	0.906981		1.86289	0.90495		1.86289	0.905427		1.86289	0.90858		1.86289	0.907025		1.86289	0.906861		1.86289	0.905295		1.86289	0.907144
1.93741	0.903434		1.93741	0.903227		1.93741	0.904993		1.93741	0.904225		1.93741	0.903551		1.93741	0.905478		1.93741	0.904243		1.93741	0.905239		1.93741	0.905548		1.93741	0.903721		1.93741	0.904816		1.93741	0.907773		1.93741	0.905894		1.93741	0.905465		1.93741	0.906026		1.93741	0.906325
2.01192	0.902757		2.01192	0.901662		2.01192	0.90487		2.01192	0.903242		2.01192	0.902754		2.01192	0.903949		2.01192	0.902464		2.01192	0.904837		2.01192	0.904737		2.01192	0.903121		2.01192	0.904135		2.01192	0.906499		2.01192	0.905299		2.01192	0.904661		2.01192	0.902802		2.01192	0.90567
2.08644	0.902146		2.08644	0.900911		2.08644	0.904285		2.08644	0.903088		2.08644	0.901346		2.08644	0.903339		2.08644	0.901679		2.08644	0.903685		2.08644	0.904667		2.08644	0.901946		2.08644	0.902976		2.08644	0.906438		2.08644	0.904557		2.08644	0.90385		2.08644	0.903629		2.08644	0.903763
2.16095	0.900984		2.16095	0.900545		2.16095	0.902452		2.16095	0.901344		2.16095	0.900671		2.16095	0.901506		2.16095	0.901616		2.16095	0.90175		2.16095	0.903513		2.16095	0.901		2.16095	0.902613		2.16095	0.905082		2.16095	0.903433		2.16095	0.903102		2.16095	0.901706		2.16095	0.902758
2.23547	0.900387		2.23547	0.899584		2.23547	0.90169		2.23547	0.900723		2.23547	0.900165		2.23547	0.901885		2.23547	0.899855		2.23547	0.900783		2.23547	0.901867		2.23547	0.900262		2.23547	0.90215		2.23547	0.904846		2.23547	0.901926		2.23547	0.902344		2.23547	0.901099		2.23547	0.901157
2.30998	0.898406		2.30998	0.898646		2.30998	0.900417		2.30998	0.901124		2.30998	0.89943		2.30998	0.90065		2.30998	0.900031		2.30998	0.90138		2.30998	0.900756		2.30998	0.898706		2.30998	0.90158		2.30998	0.904603		2.30998	0.901996		2.30998	0.900855		2.30998	0.900207		2.30998	0.900885
2.3845	0.897496		2.3845	0.897519		2.3845	0.900742		2.3845	0.899584		2.3845	0.897228		2.3845	0.900615		2.3845	0.898934		2.3845	0.900285		2.3845	0.900397		2.3845	0.899046		2.3845	0.90089		2.3845	0.903893		2.3845	0.901122		2.3845	0.900956		2.3845	0.899148		2.3845	0.90087
2.45901	0.898345		2.45901	0.89718		2.45901	0.89916		2.45901	0.898803		2.45901	0.897365		2.45901	0.898257		2.45901	0.8977		2.45901	0.899696		2.45901	0.899467		2.45901	0.897706		2.45901	0.899917		2.45901	0.902782		2.45901	0.900159		2.45901	0.899747		2.45901	0.898716		2.45901	0.898778
2.53353	0.897387		2.53353	0.895213		2.53353	0.89902		2.53353	0.897614		2.53353	0.897013		2.53353	0.899143		2.53353	0.89693		2.53353	0.899627		2.53353	0.90051		2.53353	0.897088		2.53353	0.899118		2.53353	0.90202		2.53353	0.899691		2.53353	0.898367		2.53353	0.89815		2.53353	0.898681
2.60805	0.895786		2.60805	0.895567		2.60805	0.897862		2.60805	0.89824		2.60805	0.896288		2.60805	0.897837		2.60805	0.896507		2.60805	0.898798		2.60805	0.899536		2.60805	0.896895		2.60805	0.898012		2.60805	0.901877		2.60805	0.898621		2.60805	0.898539		2.60805	0.896633		2.60805	0.898755
2.68256	0.895521		2.68256	0.894648		2.68256	0.897322		2.68256	0.896163		2.68256	0.895304		2.68256	0.89623		2.68256	0.896533		2.68256	0.898931		2.68256	0.89929		2.68256	0.896224		2.68256	0.89797		2.68256	0.901086		2.68256	0.898171		2.68256	0.897332		2.68256	0.896775		2.68256	0.898595
2.75708	0.895468		2.75708	0.894933		2.75708	0.896985		2.75708	0.89625		2.75708	0.895379		2.75708	0.8974		2.75708	0.896538		2.75708	0.89691		2.75708	0.898436		2.75708	0.895009		2.75708	0.897963		2.75708	0.900727		2.75708	0.897274		2.75708	0.897475		2.75708	0.895188		2.75708	0.897471
2.83159	0.893997		2.83159	0.893876		2.83159	0.897422		2.83159	0.89566		2.83159	0.894036		2.83159	0.895498		2.83159	0.895527		2.83159	0.89718		2.83159	0.897739		2.83159	0.894676		2.83159	0.896638		2.83159	0.900419		2.83159	0.896627		2.83159	0.896394		2.83159	0.895765		2.83159	0.897393
2.90611	0.894672		2.90611	0.893327		2.90611	0.895359		2.90611	0.895324		2.90611	0.892986		2.90611	0.89537		2.90611	0.894109		2.90611	0.896938		2.90611	0.896346		2.90611	0.894681		2.90611	0.896945		2.90611	0.899704		2.90611	0.896602		2.90611	0.896062		2.90611	0.895953		2.90611	0.896324
2.98062	0.893467		2.98062	0.893245		2.98062	0.89602		2.98062	0.895707		2.98062	0.893349		2.98062	0.895679		2.98062	0.89507		2.98062	0.896335		2.98062	0.896736		2.98062	0.893848		2.98062	0.8964		2.98062	0.900181		2.98062	0.896281		2.98062	0.89536		2.98062	0.894746		2.98062	0.895252
3.05514	0.893384		3.05514	0.891596		3.05514	0.895514		3.05514	0.894523		3.05514	0.89334		3.05514	0.89467		3.05514	0.894201		3.05514	0.896466		3.05514	0.896611		3.05514	0.893851		3.05514	0.895909		3.05514	0.898482		3.05514	0.896482		3.05514	0.894816		3.05514	0.894684		3.05514	0.893695
3.12966	0.892933		3.12966	0.892299		3.12966	0.894379		3.12966	0.894283		3.12966	0.892057		3.12966	0.894898		3.12966	0.893362		3.12966	0.895204		3.12966	0.896679		3.12966	0.893417		3.12966	0.895205		3.12966	0.899876		3.12966	0.895383		3.12966	0.894784		3.12966	0.89368		3.12966	0.894164
3.20417	0.892559		3.20417	0.891667		3.20417	0.893447		3.20417	0.893944		3.20417	0.892506		3.20417	0.895159		3.20417	0.893231		3.20417	0.895913		3.20417	0.895242		3.20417	0.892665		3.20417	0.8957		3.20417	0.899022		3.20417	0.895177		3.20417	0.894397		3.20417	0.893287		3.20417	0.89495
3.27869	0.892296		3.27869	0.891183		3.27869	0.893709		3.27869	0.89304		3.27869	0.891894		3.27869	0.893959		3.27869	0.893751		3.27869	0.894745		3.27869	0.895479		3.27869	0.893431		3.27869	0.895498		3.27869	0.89821		3.27869	0.89467		3.27869	0.894114		3.27869	0.893576		3.27869	0.894742
3.3532	0.892094		3.3532	0.891886		3.3532	0.893802		3.3532	0.893118		3.3532	0.891489		3.3532	0.892918		3.3532	0.892932		3.3532	0.895343		3.3532	0.895268		3.3532	0.892154		3.3532	0.894584		3.3532	0.898857		3.3532	0.89558		3.3532	0.894162		3.3532	0.892775		3.3532	0.893248
3.42772	0.89206		3.42772	0.890658		3.42772	0.893727		3.42772	0.893452		3.42772	0.891511		3.42772	0.893792		3.42772	0.892636		3.42772	0.894779		3.42772	0.895788		3.42772	0.89207		3.42772	0.894749		3.42772	0.8982		3.42772	0.895202		3.42772	0.894015		3.42772	0.892699		3.42772	0.892388
3.50223	0.891415		3.50223	0.890867		3.50223	0.893432		3.50223	0.892768		3.50223	0.891085		3.50223	0.892994		3.50223	0.892395		3.50223	0.895095		3.50223	0.894701		3.50223	0.891615		3.50223	0.894733		3.50223	0.898422		3.50223	0.8948		3.50223	0.893521		3.50223	0.892135		3.50223	0.892891
3.57675	0.891823		3.57675	0.891109		3.57675	0.892744		3.57675	0.892722		3.57675	0.891019		3.57675	0.893237		3.57675	0.892966		3.57675	0.89428		3.57675	0.895554		3.57675	0.892575		3.57675	0.894652		3.57675	0.898343		3.57675	0.894313		3.57675	0.893876		3.57675	0.892221		3.57675	0.892872
3.65126	0.891419		3.65126	0.889596		3.65126	0.892647		3.65126	0.892685		3.65126	0.890764		3.65126	0.892655		3.65126	0.891578		3.65126	0.893808		3.65126	0.894154		3.65126	0.891853		3.65126	0.894031		3.65126	0.897854		3.65126	0.894019		3.65126	0.893578		3.65126	0.89128		3.65126	0.892414
3.72578	0.890796		3.72578	0.889275		3.72578	0.892287		3.72578	0.892571		3.72578	0.891728		3.72578	0.893424		3.72578	0.891673		3.72578	0.89397		3.72578	0.894641		3.72578	0.892047		3.72578	0.894294		3.72578	0.897688		3.72578	0.894275		3.72578	0.893296		3.72578	0.891819		3.72578	0.891577
3.8003	0.891508		3.8003	0.888503		3.8003	0.892052		3.8003	0.891194		3.8003	0.890996		3.8003	0.893116		3.8003	0.892016		3.8003	0.894425		3.8003	0.894261		3.8003	0.890919		3.8003	0.893225		3.8003	0.898088		3.8003	0.894268		3.8003	0.892827		3.8003	0.891526		3.8003	0.891685
3.87481	0.89095		3.87481	0.889278		3.87481	0.893444		3.87481	0.892438		3.87481	0.889803		3.87481	0.892105		3.87481	0.893019		3.87481	0.893688		3.87481	0.893767		3.87481	0.890705		3.87481	0.894121		3.87481	0.897175		3.87481	0.894438		3.87481	0.893126		3.87481	0.891596		3.87481	0.89234
3.94933	0.890889		3.94933	0.889485		3.94933	0.892427		3.94933	0.892102		3.94933	0.890051		3.94933	0.892987		3.94933	0.892545		3.94933	0.893755		3.94933	0.894448		3.94933	0.891579		3.94933	0.893814		3.94933	0.898181		3.94933	0.894571		3.94933	0.892672		3.94933	0.891855		3.94933	0.892057
4.02384	0.890357		4.02384	0.889929		4.02384	0.892702		4.02384	0.892002		4.02384	0.890334		4.02384	0.892685		4.02384	0.891951		4.02384	0.894512		4.02384	0.895315		4.02384	0.891183		4.02384	0.893266		4.02384	0.897372		4.02384	0.894316		4.02384	0.893145		4.02384	0.8913		4.02384	0.8925
4.09836	0.890268		4.09836	0.88982		4.09836	0.892252		4.09836	0.891434		4.09836	0.891106		4.09836	0.892796		4.09836	0.892775		4.09836	0.895137		4.09836	0.894511		4.09836	0.891104		4.09836	0.893545		4.09836	0.899304		4.09836	0.894303		4.09836	0.893251		4.09836	0.891024		4.09836	0.8924
4.17287	0.890248		4.17287	0.889573		4.17287	0.892997		4.17287	0.891891		4.17287	0.889501		4.17287	0.892976		4.17287	0.89239		4.17287	0.894807		4.17287	0.894812		4.17287	0.891534		4.17287	0.894182		4.17287	0.898735		4.17287	0.894329		4.17287	0.893348		4.17287	0.891987		4.17287	0.892962
4.24739	0.891593		4.24739	0.889174		4.24739	0.892202		4.24739	0.892564		4.24739	0.890602		4.24739	0.893481		4.24739	0.891953		4.24739	0.895221		4.24739	0.895093		4.24739	0.891352		4.24739	0.894582		4.24739	0.898026		4.24739	0.893981		4.24739	0.893198		4.24739	0.892119		4.24739	0.892429
4.3219	0.890944		4.3219	0.88972		4.3219	0.892172		4.3219	0.891476		4.3219	0.890747		4.3219	0.893087		4.3219	0.89269		4.3219	0.895531		4.3219	0.895323		4.3219	0.891973		4.3219	0.894822		4.3219	0.899281		4.3219	0.894709		4.3219	0.893957		4.3219	0.892587		4.3219	0.89431
4.39642	0.890788		4.39642	0.889883		4.39642	0.891659		4.39642	0.892243		4.39642	0.890724		4.39642	0.892398		4.39642	0.892734		4.39642	0.894962		4.39642	0.894845		4.39642	0.890734		4.39642	0.894268		4.39642	0.898761		4.39642	0.894498		4.39642	0.894238		4.39642	0.891344		4.39642	0.892318
4.47094	0.890234		4.47094	0.890161		4.47094	0.892354		4.47094	0.892162		4.47094	0.891148		4.47094	0.892287		4.47094	0.893176		4.47094	0.895523		4.47094	0.895053		4.47094	0.891215		4.47094	0.895234		4.47094	0.899574		4.47094	0.895111		4.47094	0.893717		4.47094	0.891947		4.47094	0.893193
4.54545	0.891805		4.54545	0.889627		4.54545	0.893479		4.54545	0.89259		4.54545	0.89077		4.54545	0.893559		4.54545	0.893147		4.54545	0.895755		4.54545	0.89585		4.54545	0.891493		4.54545	0.895034		4.54545	0.899503		4.54545	0.895534		4.54545	0.894656		4.54545	0.891791		4.54545	0.892858
4.61997	0.891314		4.61997	0.890411		4.61997	0.892419		4.61997	0.893113		4.61997	0.891532		4.61997	0.893289		4.61997	0.893571		4.61997	0.896163		4.61997	0.895374		4.61997	0.891973		4.61997	0.895718		4.61997	0.899097		4.61997	0.895324		4.61997	0.894279		4.61997	0.892931		4.61997	0.892359
4.69448	0.892141		4.69448	0.890864		4.69448	0.893957		4.69448	0.893455		4.69448	0.891011		4.69448	0.894024		4.69448	0.893152		4.69448	0.896888		4.69448	0.896774		4.69448	0.892402		4.69448	0.895675		4.69448	0.89969		4.69448	0.89573		4.69448	0.894081		4.69448	0.893005		4.69448	0.894027
4.769	0.892286		4.769	0.890745		4.769	0.893447		4.769	0.893076		4.769	0.891618		4.769	0.893935		4.769	0.893586		4.769	0.897022		4.769	0.896205		4.769	0.892957		4.769	0.895979		4.769	0.901392		4.769	0.895755		4.769	0.894864		4.769	0.893529		4.769	0.894693
4.84351	0.891289		4.84351	0.890237		4.84351	0.892749		4.84351	0.894241		4.84351	0.892061		4.84351	0.894983		4.84351	0.894782		4.84351	0.897464		4.84351	0.896958		4.84351	0.892981		4.84351	0.895888		4.84351	0.900328		4.84351	0.896217		4.84351	0.894795		4.84351	0.893201		4.84351	0.894053
4.91803	0.89244		4.91803	0.891453		4.91803	0.893744		4.91803	0.893836		4.91803	0.891744		4.91803	0.894533		4.91803	0.894753		4.91803	0.897537		4.91803	0.897942		4.91803	0.893341		4.91803	0.895788		4.91803	0.90156		4.91803	0.897168		4.91803	0.896299		4.91803	0.893868		4.91803	0.894246
4.99255	0.892021		4.99255	0.891465		4.99255	0.893627		4.99255	0.893749		4.99255	0.893564		4.99255	0.894733		4.99255	0.89456		4.99255	0.896863		4.99255	0.89662		4.99255	0.892977		4.99255	0.896557		4.99255	0.901324		4.99255	0.897066		4.99255	0.896544		4.99255	0.893546		4.99255	0.893167
5.06706	0.892539		5.06706	0.89196		5.06706	0.894187		5.06706	0.894018		5.06706	0.892267		5.06706	0.894628		5.06706	0.894941		5.06706	0.897951		5.06706	0.897368		5.06706	0.893926		5.06706	0.897182		5.06706	0.901894		5.06706	0.897712		5.06706	0.895766		5.06706	0.894666		5.06706	0.893662
5.14158	0.892943		5.14158	0.892152		5.14158	0.893622		5.14158	0.895297		5.14158	0.893602		5.14158	0.895385		5.14158	0.89495		5.14158	0.898739		5.14158	0.898983		5.14158	0.894257		5.14158	0.898309		5.14158	0.90226		5.14158	0.898398		5.14158	0.896641		5.14158	0.894192		5.14158	0.894641
5.21609	0.894935		5.21609	0.892615		5.21609	0.895772		5.21609	0.895484		5.21609	0.892891		5.21609	0.895904		5.21609	0.89621		5.21609	0.899451		5.21609	0.89959		5.21609	0.894885		5.21609	0.898197		5.21609	0.902418		5.21609	0.898541		5.21609	0.896568		5.21609	0.894632		5.21609	0.894768
5.29061	0.892856		5.29061	0.892106		5.29061	0.894949		5.29061	0.895658		5.29061	0.894137		5.29061	0.895528		5.29061	0.896951		5.29061	0.899199		5.29061	0.899987		5.29061	0.894461		5.29061	0.898028		5.29061	0.902447		5.29061	0.898978		5.29061	0.897201		5.29061	0.896035		5.29061	0.894671
5.36512	0.893384		5.36512	0.893454		5.36512	0.893897		5.36512	0.89622		5.36512	0.894719		5.36512	0.896889		5.36512	0.897361		5.36512	0.899999		5.36512	0.899247		5.36512	0.89515		5.36512	0.898295		5.36512	0.90354		5.36512	0.90002		5.36512	0.898071		5.36512	0.895627		5.36512	0.894712
5.43964	0.894609		5.43964	0.893037		5.43964	0.895842		5.43964	0.897049		5.43964	0.895112		5.43964	0.896311		5.43964	0.897312		5.43964	0.899484		5.43964	0.90026		5.43964	0.895334		5.43964	0.898747		5.43964	0.904098		5.43964	0.900125		5.43964	0.898189		5.43964	0.895312		5.43964	0.896287
5.51415	0.895341		5.51415	0.89434		5.51415	0.896352		5.51415	0.89765		5.51415	0.89539		5.51415	0.897959		5.51415	0.897768		5.51415	0.901047		5.51415	0.90002		5.51415	0.896134		5.51415	0.899368		5.51415	0.903878		5.51415	0.900416		5.51415	0.898093		5.51415	0.896373		5.51415	0.896886
5.58867	0.895758		5.58867	0.894484		5.58867	0.896815		5.58867	0.897493		5.58867	0.895171		5.58867	0.897481		5.58867	0.898565		5.58867	0.90179		5.58867	0.9005		5.58867	0.896681		5.58867	0.900443		5.58867	0.904473		5.58867	0.901359		5.58867	0.898977		5.58867	0.896395		5.58867	0.89524
5.66319	0.896833		5.66319	0.895014		5.66319	0.89652		5.66319	0.897941		5.66319	0.89656		5.66319	0.898706		5.66319	0.898469		5.66319	0.900342		5.66319	0.901538		5.66319	0.89759		5.66319	0.900427		5.66319	0.905274		5.66319	0.900832		5.66319	0.898567		5.66319	0.896913		5.66319	0.897739
5.7377	0.898313		5.7377	0.895527		5.7377	0.898125		5.7377	0.897757		5.7377	0.8969		5.7377	0.89925		5.7377	0.899608		5.7377	0.901628		5.7377	0.902863		5.7377	0.897846		5.7377	0.900715		5.7377	0.906722		5.7377	0.901722		5.7377	0.899549		5.7377	0.89799		5.7377	0.89536
5.81222	0.896115		5.81222	0.896261		5.81222	0.897897		5.81222	0.898602		5.81222	0.896885		5.81222	0.898978		5.81222	0.900105		5.81222	0.903141		5.81222	0.903492		5.81222	0.898062		5.81222	0.902022		5.81222	0.907077		5.81222	0.903143		5.81222	0.900049		5.81222	0.898624		5.81222	0.897556
5.88673	0.897781		5.88673	0.896527		5.88673	0.898772		5.88673	0.899603		5.88673	0.89819		5.88673	0.900119		5.88673	0.901315		5.88673	0.903112		5.88673	0.903028		5.88673	0.898676		5.88673	0.902243		5.88673	0.907607		5.88673	0.903292		5.88673	0.900661		5.88673	0.898256		5.88673	0.898915
5.96125	0.899518		5.96125	0.897018		5.96125	0.899732		5.96125	0.900535		5.96125	0.897772		5.96125	0.900558		5.96125	0.901709		5.96125	0.903655		5.96125	0.903295		5.96125	0.898878		5.96125	0.902627		5.96125	0.908193		5.96125	0.903793		5.96125	0.901296		5.96125	0.898646		5.96125	0.899612
6.03576	0.899595		6.03576	0.896888		6.03576	0.899012		6.03576	0.90055		6.03576	0.898319		6.03576	0.901004		6.03576	0.902225		6.03576	0.904569		6.03576	0.904516		6.03576	0.900006		6.03576	0.903193		6.03576	0.907743		6.03576	0.903853		6.03576	0.902268		6.03576	0.898094		6.03576	0.897765
6.11028	0.899953		6.11028	0.897788		6.11028	0.899572		6.11028	0.901669		6.11028	0.899796		6.11028	0.90153		6.11028	0.902601		6.11028	0.904809		6.11028	0.905111		6.11028	0.90035		6.11028	0.904486		6.11028	0.908168		6.11028	0.904476		6.11028	0.902492		6.11028	0.900149		6.11028	0.899035
6.18479	0.899819		6.18479	0.898602		6.18479	0.899777		6.18479	0.902014		6.18479	0.899535		6.18479	0.901824		6.18479	0.903806		6.18479	0.905539		6.18479	0.905399		6.18479	0.90068		6.18479	0.904169		6.18479	0.909691		6.18479	0.905528		6.18479	0.902797		6.18479	0.900149		6.18479	0.900848
6.25931	0.901445		6.25931	0.899514		6.25931	0.90157		6.25931	0.902702		6.25931	0.900779		6.25931	0.902828		6.25931	0.903898		6.25931	0.90688		6.25931	0.906116		6.25931	0.900576		6.25931	0.905373		6.25931	0.910165		6.25931	0.906515		6.25931	0.904099		6.25931	0.900767		6.25931	0.902173
6.33383	0.900937		6.33383	0.899952		6.33383	0.900895		6.33383	0.90367		6.33383	0.900652		6.33383	0.903206		6.33383	0.904075		6.33383	0.907333		6.33383	0.90696		6.33383	0.901856		6.33383	0.906299		6.33383	0.910565		6.33383	0.906842		6.33383	0.904676		6.33383	0.901986		6.33383	0.902028
6.40834	0.901619		6.40834	0.901082		6.40834	0.901892		6.40834	0.904594		6.40834	0.902092		6.40834	0.904052		6.40834	0.904911		6.40834	0.907705		6.40834	0.906956		6.40834	0.902432		6.40834	0.906956		6.40834	0.910451		6.40834	0.907073		6.40834	0.904591		6.40834	0.902414		6.40834	0.90201
6.48286	0.90212		6.48286	0.900719		6.48286	0.902475		6.48286	0.904393		6.48286	0.90286		6.48286	0.904245		6.48286	0.906097		6.48286	0.907435		6.48286	0.90757		6.48286	0.904293		6.48286	0.907495		6.48286	0.912203		6.48286	0.909018		6.48286	0.905185		6.48286	0.903006		6.48286	0.901392
6.55737	0.904617		6.55737	0.902327		6.55737	0.902622		6.55737	0.904756		6.55737	0.903554		6.55737	0.905734		6.55737	0.907107		6.55737	0.908493		6.55737	0.909341		6.55737	0.904525		6.55737	0.90764		6.55737	0.912344		6.55737	0.909052		6.55737	0.906009		6.55737	0.903204		6.55737	0.903067
6.63189	0.903699		6.63189	0.903434		6.63189	0.90375		6.63189	0.906567		6.63189	0.903037		6.63189	0.906254		6.63189	0.907306		6.63189	0.90993		6.63189	0.909393		6.63189	0.904651		6.63189	0.908686		6.63189	0.913417		6.63189	0.909935		6.63189	0.906391		6.63189	0.903825		6.63189	0.904891
6.7064	0.905102		6.7064	0.903301		6.7064	0.90458		6.7064	0.906485		6.7064	0.904682		6.7064	0.906451		6.7064	0.907695		6.7064	0.909933		6.7064	0.909935		6.7064	0.905256		6.7064	0.909311		6.7064	0.914084		6.7064	0.910044		6.7064	0.906892		6.7064	0.904797		6.7064	0.904359
6.78092	0.904283		6.78092	0.903605		6.78092	0.904498		6.78092	0.906411		6.78092	0.90493		6.78092	0.907536		6.78092	0.909066		6.78092	0.911077		6.78092	0.91146		6.78092	0.905547		6.78092	0.911069		6.78092	0.915358		6.78092	0.911122		6.78092	0.907692		6.78092	0.905451		6.78092	0.90507
6.85544	0.905108		6.85544	0.903664		6.85544	0.905113		6.85544	0.907893		6.85544	0.906094		6.85544	0.907417		6.85544	0.910251		6.85544	0.91145		6.85544	0.911658		6.85544	0.906424		6.85544	0.911159		6.85544	0.915464		6.85544	0.911581		6.85544	0.90814		6.85544	0.905139		6.85544	0.905644
6.92995	0.90679		6.92995	0.904638		6.92995	0.907363		6.92995	0.908871		6.92995	0.905698		6.92995	0.909425		6.92995	0.91062		6.92995	0.912795		6.92995	0.911627		6.92995	0.90767		6.92995	0.912076		6.92995	0.91597		6.92995	0.912765		6.92995	0.908884		6.92995	0.906056		6.92995	0.906459
7.00447	0.905907		7.00447	0.906693		7.00447	0.90719		7.00447	0.909142		7.00447	0.908203		7.00447	0.909353		7.00447	0.911957		7.00447	0.91309		7.00447	0.913919		7.00447	0.908151		7.00447	0.91323		7.00447	0.917894		7.00447	0.914008		7.00447	0.909617		7.00447	0.907915		7.00447	0.906988
7.07898	0.908889		7.07898	0.90598		7.07898	0.90877		7.07898	0.910247		7.07898	0.907928		7.07898	0.910634		7.07898	0.91211		7.07898	0.913925		7.07898	0.914047		7.07898	0.908294		7.07898	0.91359		7.07898	0.917322		7.07898	0.914605		7.07898	0.910389		7.07898	0.908579		7.07898	0.907796
7.1535	0.908707		7.1535	0.907168		7.1535	0.908598		7.1535	0.910908		7.1535	0.908605		7.1535	0.911608		7.1535	0.912962		7.1535	0.915415		7.1535	0.914687		7.1535	0.908736		7.1535	0.913447		7.1535	0.917639		7.1535	0.914565		7.1535	0.910997		7.1535	0.909053		7.1535	0.907658
7.22801	0.910048		7.22801	0.907978		7.22801	0.909605		7.22801	0.911632		7.22801	0.909622		7.22801	0.912607		7.22801	0.91487		7.22801	0.915995		7.22801	0.91591		7.22801	0.909878		7.22801	0.914353		7.22801	0.918679		7.22801	0.915913		7.22801	0.911967		7.22801	0.908179		7.22801	0.90857
7.30253	0.911087		7.30253	0.909245		7.30253	0.90933		7.30253	0.912453		7.30253	0.910598		7.30253	0.912918		7.30253	0.914468		7.30253	0.916457		7.30253	0.915772		7.30253	0.911376		7.30253	0.915471		7.30253	0.919497		7.30253	0.91654		7.30253	0.913278		7.30253	0.909964		7.30253	0.90911
7.37704	0.91154		7.37704	0.909207		7.37704	0.910398		7.37704	0.913997		7.37704	0.91174		7.37704	0.914275		7.37704	0.915589		7.37704	0.917516		7.37704	0.91672		7.37704	0.91179		7.37704	0.916151		7.37704	0.921416		7.37704	0.916751		7.37704	0.913534		7.37704	0.9114		7.37704	0.909948
7.45156	0.911758		7.45156	0.910125		7.45156	0.911703		7.45156	0.913441		7.45156	0.911395		7.45156	0.91407		7.45156	0.917839		7.45156	0.918806		7.45156	0.918045		7.45156	0.913842		7.45156	0.916643		7.45156	0.921517		7.45156	0.918084		7.45156	0.91443		7.45156	0.911949		7.45156	0.909427
7.52608	0.912921		7.52608	0.909987		7.52608	0.912311		7.52608	0.914571		7.52608	0.913275		7.52608	0.915933		7.52608	0.916766		7.52608	0.919176		7.52608	0.919482		7.52608	0.913381		7.52608	0.918026		7.52608	0.922097		7.52608	0.919149		7.52608	0.915474		7.52608	0.912209		7.52608	0.912789
7.60059	0.913475		7.60059	0.911863		7.60059	0.912683		7.60059	0.915434		7.60059	0.913571		7.60059	0.915835		7.60059	0.918344		7.60059	0.919846		7.60059	0.919846		7.60059	0.914561		7.60059	0.91866		7.60059	0.923477		7.60059	0.91988		7.60059	0.916089		7.60059	0.912739		7.60059	0.911363
7.67511	0.913865		7.67511	0.912207		7.67511	0.913316		7.67511	0.916706		7.67511	0.914547		7.67511	0.917281		7.67511	0.91996		7.67511	0.921392		7.67511	0.920464		7.67511	0.915459		7.67511	0.918598		7.67511	0.9245		7.67511	0.920278		7.67511	0.916132		7.67511	0.914992		7.67511	0.912353
7.74962	0.915703		7.74962	0.913644		7.74962	0.914386		7.74962	0.917452		7.74962	0.915789		7.74962	0.919148		7.74962	0.920871		7.74962	0.92152		7.74962	0.920695		7.74962	0.915727		7.74962	0.920452		7.74962	0.923535		7.74962	0.921228		7.74962	0.917357		7.74962	0.913904		7.74962	0.913504
7.82414	0.914775		7.82414	0.914276		7.82414	0.914213		7.82414	0.916909		7.82414	0.915837		7.82414	0.918101		7.82414	0.920777		7.82414	0.923699		7.82414	0.921863		7.82414	0.916304		7.82414	0.920344		7.82414	0.926311		7.82414	0.922202		7.82414	0.918628		7.82414	0.915817		7.82414	0.913868
7.89865	0.917229		7.89865	0.915322		7.89865	0.915528		7.89865	0.919475		7.89865	0.917317		7.89865	0.920377		7.89865	0.923065		7.89865	0.923441		7.89865	0.922729		7.89865	0.917435		7.89865	0.921587		7.89865	0.925851		7.89865	0.923265		7.89865	0.919285		7.89865	0.916301		7.89865	0.915298
7.97317	0.917197		7.97317	0.916255		7.97317	0.916456		7.97317	0.920098		7.97317	0.917716		7.97317	0.920226		7.97317	0.922877		7.97317	0.924933		7.97317	0.924696		7.97317	0.91799		7.97317	0.922581		7.97317	0.926924		7.97317	0.92361		7.97317	0.919603		7.97317	0.916651		7.97317	0.915797
8.04768	0.918129		8.04768	0.917158		8.04768	0.916566		8.04768	0.921084		8.04768	0.919042		8.04768	0.921146		8.04768	0.923148		8.04768	0.924967		8.04768	0.924958		8.04768	0.919183		8.04768	0.923346		8.04768	0.928417		8.04768	0.924891		8.04768	0.919932		8.04768	0.91763		8.04768	0.916475
8.1222	0.919099		8.1222	0.917402		8.1222	0.918336		8.1222	0.921005		8.1222	0.920923		8.1222	0.92307		8.1222	0.923734		8.1222	0.926151		8.1222	0.92589		8.1222	0.919793		8.1222	0.923713		8.1222	0.928707		8.1222	0.92587		8.1222	0.920726		8.1222	0.917531		8.1222	0.917905
8.19672	0.920547		8.19672	0.918908		8.19672	0.919073		8.19672	0.923695		8.19672	0.921332		8.19672	0.923042		8.19672	0.925001		8.19672	0.926623		8.19672	0.925989		8.19672	0.920788		8.19672	0.925737		8.19672	0.929497		8.19672	0.926629		8.19672	0.921726		8.19672	0.918964		8.19672	0.918385
8.27123	0.920979		8.27123	0.919122		8.27123	0.920301		8.27123	0.923647		8.27123	0.920954		8.27123	0.923983		8.27123	0.92683		8.27123	0.928333		8.27123	0.927748		8.27123	0.921933		8.27123	0.926681		8.27123	0.929486		8.27123	0.927549		8.27123	0.922172		8.27123	0.920119		8.27123	0.919096
8.34575	0.921454		8.34575	0.91948		8.34575	0.920764		8.34575	0.924026		8.34575	0.922921		8.34575	0.925276		8.34575	0.926826		8.34575	0.92962		8.34575	0.928081		8.34575	0.92198		8.34575	0.927555		8.34575	0.931402		8.34575	0.928212		8.34575	0.923232		8.34575	0.920501		8.34575	0.919569
8.42026	0.922906		8.42026	0.921461		8.42026	0.921591		8.42026	0.926141		8.42026	0.923322		8.42026	0.925911		8.42026	0.928869		8.42026	0.930145		8.42026	0.929994		8.42026	0.923627		8.42026	0.927687		8.42026	0.931665		8.42026	0.928598		8.42026	0.924412		8.42026	0.920723		8.42026	0.920239
8.49478	0.923612		8.49478	0.921268		8.49478	0.923089		8.49478	0.926716		8.49478	0.925226		8.49478	0.927241		8.49478	0.929721		8.49478	0.930883		8.49478	0.930068		8.49478	0.925381		8.49478	0.929267		8.49478	0.932044		8.49478	0.929556		8.49478	0.92558		8.49478	0.921926		8.49478	0.919316
8.56929	0.924129		8.56929	0.923311		8.56929	0.923019		8.56929	0.927322		8.56929	0.924201		8.56929	0.928126		8.56929	0.930088		8.56929	0.931655		8.56929	0.930735		8.56929	0.925609		8.56929	0.929466		8.56929	0.933391		8.56929	0.930365		8.56929	0.925854		8.56929	0.92295		8.56929	0.920995
8.64381	0.926551		8.64381	0.923734		8.64381	0.923941		8.64381	0.927972		8.64381	0.926651		8.64381	0.928019		8.64381	0.930616		8.64381	0.931849		8.64381	0.931474		8.64381	0.926022		8.64381	0.929866		8.64381	0.935235		8.64381	0.931585		8.64381	0.926297		8.64381	0.922328		8.64381	0.920682
8.71833	0.925969		8.71833	0.924494		8.71833	0.925406		8.71833	0.928966		8.71833	0.926881		8.71833	0.929052		8.71833	0.932453		8.71833	0.934565		8.71833	0.932754		8.71833	0.927661		8.71833	0.931916		8.71833	0.935767		8.71833	0.932802		8.71833	0.927119		8.71833	0.924293		8.71833	0.922138
8.79284	0.926016		8.79284	0.925554		8.79284	0.926001		8.79284	0.930239		8.79284	0.927374		8.79284	0.929774		8.79284	0.93389		8.79284	0.934758		8.79284	0.934305		8.79284	0.928158		8.79284	0.931659		8.79284	0.936351		8.79284	0.933048		8.79284	0.927924		8.79284	0.924731		8.79284	0.922607
8.86736	0.928549		8.86736	0.92613		8.86736	0.926694		8.86736	0.931725		8.86736	0.928882		8.86736	0.931178		8.86736	0.934611		8.86736	0.936887		8.86736	0.935563		8.86736	0.928723		8.86736	0.932713		8.86736	0.93747		8.86736	0.934203		8.86736	0.927647		8.86736	0.926396		8.86736	0.922645
8.94187	0.928868		8.94187	0.926617		8.94187	0.928292		8.94187	0.932696		8.94187	0.9297		8.94187	0.932673		8.94187	0.936029		8.94187	0.93649		8.94187	0.935645		8.94187	0.929526		8.94187	0.933465		8.94187	0.938448		8.94187	0.93541		8.94187	0.929363		8.94187	0.926736		8.94187	0.924558
9.01639	0.930324		9.01639	0.928145		9.01639	0.929077		9.01639	0.932742		9.01639	0.931638		9.01639	0.933212		9.01639	0.936806		9.01639	0.9379		9.01639	0.936172		9.01639	0.930728		9.01639	0.934826		9.01639	0.938767		9.01639	0.936015		9.01639	0.930834		9.01639	0.928415		9.01639	0.924543
9.0909	0.930631		9.0909	0.929895		9.0909	0.930412		9.0909	0.933712		9.0909	0.932082		9.0909	0.934723		9.0909	0.936975		9.0909	0.938697		9.0909	0.936991		9.0909	0.931822		9.0909	0.936115		9.0909	0.938862		9.0909	0.936981		9.0909	0.931209		9.0909	0.928961		9.0909	0.925511
9.16542	0.931925		9.16542	0.92974		9.16542	0.930314		9.16542	0.935517		9.16542	0.932709		9.16542	0.936258		9.16542	0.9389		9.16542	0.940329		9.16542	0.93819		9.16542	0.932366		9.16542	0.937567		9.16542	0.940935		9.16542	0.937453		9.16542	0.932718		9.16542	0.929816		9.16542	0.926874
9.23993	0.932669		9.23993	0.930192		9.23993	0.931289		9.23993	0.935702		9.23993	0.933746		9.23993	0.935575		9.23993	0.939137		9.23993	0.940805		9.23993	0.938651		9.23993	0.933953		9.23993	0.93671		9.23993	0.942098		9.23993	0.938727		9.23993	0.932395		9.23993	0.93028		9.23993	0.928282
9.31445	0.932946		9.31445	0.932111		9.31445	0.931429		9.31445	0.937294		9.31445	0.934859		9.31445	0.938281		9.31445	0.940607		9.31445	0.942305		9.31445	0.939989		9.31445	0.934169		9.31445	0.937702		9.31445	0.941981		9.31445	0.93949		9.31445	0.934352		9.31445	0.93134		9.31445	0.927489
9.38897	0.934451		9.38897	0.932329		9.38897	0.931577		9.38897	0.937283		9.38897	0.935877		9.38897	0.938179		9.38897	0.941417		9.38897	0.94278		9.38897	0.941143		9.38897	0.934871		9.38897	0.939427		9.38897	0.943676		9.38897	0.940708		9.38897	0.934537		9.38897	0.930534		9.38897	0.927988
9.46348	0.935061		9.46348	0.933156		9.46348	0.933874		9.46348	0.939046		9.46348	0.936575		9.46348	0.93854		9.46348	0.94218		9.46348	0.944413		9.46348	0.942124		9.46348	0.936646		9.46348	0.940905		9.46348	0.945271		9.46348	0.941807		9.46348	0.93584		9.46348	0.932653		9.46348	0.928963
9.538	0.935817		9.538	0.934545		9.538	0.934087		9.538	0.940166		9.538	0.937834		9.538	0.93987		9.538	0.943633		9.538	0.944446		9.538	0.943559		9.538	0.936793		9.538	0.94048		9.538	0.943972		9.538	0.94277		9.538	0.936243		9.538	0.932319		9.538	0.930724
9.61251	0.937041		9.61251	0.935286		9.61251	0.934979		9.61251	0.940362		9.61251	0.938523		9.61251	0.941596		9.61251	0.944269		9.61251	0.945924		9.61251	0.943623		9.61251	0.937606		9.61251	0.942186		9.61251	0.945822		9.61251	0.942654		9.61251	0.936692		9.61251	0.932987		9.61251	0.930315
9.68703	0.937225		9.68703	0.935716		9.68703	0.937382		9.68703	0.941711		9.68703	0.938793		9.68703	0.94224		9.68703	0.945637		9.68703	0.946971		9.68703	0.944907		9.68703	0.938935		9.68703	0.942044		9.68703	0.946164		9.68703	0.944312		9.68703	0.936934		9.68703	0.934404		9.68703	0.930605
9.76154	0.93807		9.76154	0.93626		9.76154	0.93601		9.76154	0.943544		9.76154	0.940611		9.76154	0.943905		9.76154	0.946899		9.76154	0.948052		9.76154	0.946259		9.76154	0.939382		9.76154	0.94338		9.76154	0.948007		9.76154	0.945376		9.76154	0.938306		9.76154	0.935685		9.76154	0.931879
9.83606	0.940603		9.83606	0.937925		9.83606	0.938007		9.83606	0.942777		9.83606	0.94072		9.83606	0.943601		9.83606	0.94694		9.83606	0.949291		9.83606	0.947364		9.83606	0.939991		9.83606	0.945042		9.83606	0.948782		9.83606	0.946353		9.83606	0.938862		9.83606	0.935977		9.83606	0.932925
9.91057	0.940684		9.91057	0.938149		9.91057	0.93908		9.91057	0.944228		9.91057	0.941549		9.91057	0.94439		9.91057	0.948958		9.91057	0.949344		9.91057	0.948565		9.91057	0.94161		9.91057	0.946243		9.91057	0.949497		9.91057	0.946351		9.91057	0.940088		9.91057	0.938284		9.91057	0.933089
9.98509	0.941381		9.98509	0.939956		9.98509	0.93869		9.98509	0.946039		9.98509	0.942072		9.98509	0.945853		9.98509	0.950998		9.98509	0.952238		9.98509	0.949328		9.98509	0.942213		9.98509	0.946033		9.98509	0.950468		9.98509	0.948006		9.98509	0.941327		9.98509	0.938674		9.98509	0.9339
10.0596	0.942637		10.0596	0.940439		10.0596	0.939597		10.0596	0.946075		10.0596	0.943478		10.0596	0.946524		10.0596	0.95091		10.0596	0.951871		10.0596	0.949839		10.0596	0.942842		10.0596	0.947165		10.0596	0.951256		10.0596	0.948635		10.0596	0.941667		10.0596	0.939717		10.0596	0.934239
10.1341	0.943474		10.1341	0.942566		10.1341	0.940592		10.1341	0.948086		10.1341	0.944092		10.1341	0.948216		10.1341	0.951282		10.1341	0.95354		10.1341	0.950496		10.1341	0.943665		10.1341	0.948136		10.1341	0.951297		10.1341	0.949879		10.1341	0.942852		10.1341	0.939871		10.1341	0.934645
10.2086	0.944264		10.2086	0.941935		10.2086	0.940405		10.2086	0.948112		10.2086	0.946057		10.2086	0.949672		10.2086	0.952436		10.2086	0.954245		10.2086	0.952338		10.2086	0.944236		10.2086	0.948844		10.2086	0.952845		10.2086	0.951236		10.2086	0.943432		10.2086	0.939817		10.2086	0.936458
10.2832	0.944644		10.2832	0.942849		10.2832	0.942717		10.2832	0.949298		10.2832	0.946881		10.2832	0.950207		10.2832	0.953391		10.2832	0.954075		10.2832	0.952324		10.2832	0.945637		10.2832	0.949869		10.2832	0.952739		10.2832	0.951383		10.2832	0.943673		10.2832	0.940897		10.2832	0.937285
10.3577	0.945696		10.3577	0.944191		10.3577	0.944275		10.3577	0.94982		10.3577	0.947547		10.3577	0.951168		10.3577	0.955236		10.3577	0.95607		10.3577	0.953364		10.3577	0.946681		10.3577	0.950877		10.3577	0.95386		10.3577	0.95214		10.3577	0.945138		10.3577	0.942534		10.3577	0.93791
10.4322	0.947119		10.4322	0.944006		10.4322	0.944963		10.4322	0.951264		10.4322	0.947704		10.4322	0.951626		10.4322	0.954791		10.4322	0.957059		10.4322	0.954589		10.4322	0.948393		10.4322	0.951988		10.4322	0.954817		10.4322	0.95326		10.4322	0.945837		10.4322	0.943667		10.4322	0.937236
10.5067	0.947509		10.5067	0.946213		10.5067	0.945518		10.5067	0.95219		10.5067	0.949281		10.5067	0.95313		10.5067	0.956195		10.5067	0.956756		10.5067	0.955785		10.5067	0.94908		10.5067	0.952702		10.5067	0.955664		10.5067	0.954539		10.5067	0.947443		10.5067	0.943078		10.5067	0.940394
10.5812	0.948393		10.5812	0.946619		10.5812	0.946143		10.5812	0.953923		10.5812	0.949645		10.5812	0.954022		10.5812	0.958076		10.5812	0.95895		10.5812	0.956987		10.5812	0.94967		10.5812	0.954279		10.5812	0.95706		10.5812	0.955168		10.5812	0.947382		10.5812	0.944085		10.5812	0.939969
10.6557	0.949681		10.6557	0.948008		10.6557	0.946568		10.6557	0.95374		10.6557	0.952188		10.6557	0.954458		10.6557	0.959173		10.6557	0.959992		10.6557	0.957412		10.6557	0.949635		10.6557	0.955417		10.6557	0.957918		10.6557	0.955647		10.6557	0.948465		10.6557	0.945465		10.6557	0.940435
10.7302	0.950332		10.7302	0.948217		10.7302	0.948075		10.7302	0.955495		10.7302	0.951827		10.7302	0.955313		10.7302	0.95941		10.7302	0.9603		10.7302	0.957193		10.7302	0.951839		10.7302	0.955544		10.7302	0.95822		10.7302	0.957079		10.7302	0.949285		10.7302	0.94618		10.7302	0.940267
10.8048	0.951785		10.8048	0.949457		10.8048	0.94926		10.8048	0.956013		10.8048	0.953481		10.8048	0.956013		10.8048	0.9608		10.8048	0.962022		10.8048	0.959094		10.8048	0.952755		10.8048	0.95641		10.8048	0.95898		10.8048	0.957933		10.8048	0.950312		10.8048	0.946358		10.8048	0.940997
10.8793	0.951737		10.8793	0.951044		10.8793	0.950063		10.8793	0.957119		10.8793	0.954351		10.8793	0.958456		10.8793	0.961696		10.8793	0.962742		10.8793	0.959457		10.8793	0.953508		10.8793	0.957829		10.8793	0.959544		10.8793	0.958838		10.8793	0.951241		10.8793	0.947472		10.8793	0.941135
10.9538	0.95243		10.9538	0.952043		10.9538	0.950585		10.9538	0.958022		10.9538	0.955074		10.9538	0.95948		10.9538	0.962618		10.9538	0.963572		10.9538	0.960817		10.9538	0.953863		10.9538	0.957703		10.9538	0.960975		10.9538	0.959768		10.9538	0.951359		10.9538	0.948563		10.9538	0.943756
11.0283	0.953819		11.0283	0.952625		11.0283	0.951081		11.0283	0.95906		11.0283	0.954606		11.0283	0.959339		11.0283	0.963572		11.0283	0.964763		11.0283	0.962165		11.0283	0.955121		11.0283	0.959885		11.0283	0.961797		11.0283	0.960137		11.0283	0.952413		11.0283	0.949545		11.0283	0.944173
11.1028	0.954727		11.1028	0.952882		11.1028	0.952961		11.1028	0.959782		11.1028	0.955989		11.1028	0.959741		11.1028	0.964142		11.1028	0.964956		11.1028	0.963451		11.1028	0.956788		11.1028	0.960179		11.1028	0.962788		11.1028	0.961192		11.1028	0.953527		11.1028	0.949485		11.1028	0.945368
11.1773	0.955784		11.1773	0.953589		11.1773	0.952988		11.1773	0.960768		11.1773	0.957798		11.1773	0.962193		11.1773	0.965095		11.1773	0.965777		11.1773	0.963633		11.1773	0.957061		11.1773	0.960715		11.1773	0.962295		11.1773	0.962035		11.1773	0.953749		11.1773	0.951098		11.1773	0.94491
11.2519	0.956169		11.2519	0.95548		11.2519	0.954388		11.2519	0.961857		11.2519	0.958279		11.2519	0.962336		11.2519	0.966085		11.2519	0.968034		11.2519	0.965404		11.2519	0.958163		11.2519	0.961535		11.2519	0.963107		11.2519	0.962954		11.2519	0.955069		11.2519	0.950462		11.2519	0.946053
11.3264	0.956721		11.3264	0.955723		11.3264	0.955073		11.3264	0.962817		11.3264	0.958922		11.3264	0.963664		11.3264	0.967613		11.3264	0.968757		11.3264	0.96534		11.3264	0.95951		11.3264	0.963016		11.3264	0.965228		11.3264	0.963897		11.3264	0.955727		11.3264	0.952407		11.3264	0.945618
11.4009	0.95923		11.4009	0.957017		11.4009	0.955308		11.4009	0.96278		11.4009	0.960248		11.4009	0.963867		11.4009	0.96868		11.4009	0.969096		11.4009	0.966719		11.4009	0.959643		11.4009	0.964228		11.4009	0.967005		11.4009	0.964882		11.4009	0.956626		11.4009	0.953676		11.4009	0.948563
11.4754	0.959539		11.4754	0.957		11.4754	0.957136		11.4754	0.964228		11.4754	0.96063		11.4754	0.964971		11.4754	0.969712		11.4754	0.970745		11.4754	0.967783		11.4754	0.960237		11.4754	0.964393		11.4754	0.966055		11.4754	0.965042		11.4754	0.957534		11.4754	0.953055		11.4754	0.947494
11.5499	0.960182		11.5499	0.959062		11.5499	0.958466		11.5499	0.964323		11.5499	0.962085		11.5499	0.965849		11.5499	0.970889		11.5499	0.971428		11.5499	0.969204		11.5499	0.962071		11.5499	0.965506		11.5499	0.967668		11.5499	0.966296		11.5499	0.957794		11.5499	0.955154		11.5499	0.949896
11.6244	0.960881		11.6244	0.958789		11.6244	0.957473		11.6244	0.966153		11.6244	0.962175		11.6244	0.967208		11.6244	0.971828		11.6244	0.972358		11.6244	0.970234		11.6244	0.963045		11.6244	0.965331		11.6244	0.968737		11.6244	0.966833		11.6244	0.958472		11.6244	0.955714		11.6244	0.949684
11.6989	0.961522		11.6989	0.960741		11.6989	0.959559		11.6989	0.967413		11.6989	0.963681		11.6989	0.967718		11.6989	0.972498		11.6989	0.972825		11.6989	0.970397		11.6989	0.964014		11.6989	0.966789		11.6989	0.969456		11.6989	0.967414		11.6989	0.959547		11.6989	0.956717		11.6989	0.950436
11.7735	0.962782		11.7735	0.960299		11.7735	0.959219		11.7735	0.967547		11.7735	0.96441		11.7735	0.968734		11.7735	0.973265		11.7735	0.973859		11.7735	0.970743		11.7735	0.963994		11.7735	0.968106		11.7735	0.970461		11.7735	0.968718		11.7735	0.960117		11.7735	0.957291		11.7735	0.949643
11.848	0.963512		11.848	0.960941		11.848	0.960566		11.848	0.968568		11.848	0.965543		11.848	0.969722		11.848	0.974005		11.848	0.975082		11.848	0.972923		11.848	0.965183		11.848	0.968931		11.848	0.972029		11.848	0.969904		11.848	0.960708		11.848	0.958706		11.848	0.950998
11.9225	0.964749		11.9225	0.962066		11.9225	0.961436		11.9225	0.970468		11.9225	0.965633		11.9225	0.97074		11.9225	0.975438		11.9225	0.975484		11.9225	0.972575		11.9225	0.966272		11.9225	0.969886		11.9225	0.97252		11.9225	0.970141		11.9225	0.961612		11.9225	0.959228		11.9225	0.952022
11.997	0.965099		11.997	0.963836		11.997	0.962811		11.997	0.971501		11.997	0.967853		11.997	0.971036		11.997	0.975646		11.997	0.976024		11.997	0.973571		11.997	0.966711		11.997	0.970486		11.997	0.972776		11.997	0.970846		11.997	0.962528		11.997	0.958904		11.997	0.952852
12.0715	0.966617		12.0715	0.964954		12.0715	0.962554		12.0715	0.971882		12.0715	0.967946		12.0715	0.972542		12.0715	0.977278		12.0715	0.977437		12.0715	0.974363		12.0715	0.968066		12.0715	0.971369		12.0715	0.973723		12.0715	0.972178		12.0715	0.962822		12.0715	0.960289		12.0715	0.952685
12.146	0.966951		12.146	0.965043		12.146	0.963386		12.146	0.972644		12.146	0.968442		12.146	0.972959		12.146	0.978672		12.146	0.978145		12.146	0.975425		12.146	0.968838		12.146	0.972356		12.146	0.973576		12.146	0.973052		12.146	0.964446		12.146	0.959903		12.146	0.953057
12.2206	0.967925		12.2206	0.965812		12.2206	0.964169		12.2206	0.973301		12.2206	0.969473		12.2206	0.973824		12.2206	0.978586		12.2206	0.979415		12.2206	0.976384		12.2206	0.97029		12.2206	0.973374		12.2206	0.975801		12.2206	0.973959		12.2206	0.964711		12.2206	0.961217		12.2206	0.954788
12.2951	0.969211		12.2951	0.966472		12.2951	0.966494		12.2951	0.973665		12.2951	0.970348		12.2951	0.974883		12.2951	0.980725		12.2951	0.980706		12.2951	0.976247		12.2951	0.970269		12.2951	0.97462		12.2951	0.975619		12.2951	0.974197		12.2951	0.965648		12.2951	0.961774		12.2951	0.953597
12.3696	0.969175		12.3696	0.968297		12.3696	0.966534		12.3696	0.975257		12.3696	0.972186		12.3696	0.976165		12.3696	0.980295		12.3696	0.98154		12.3696	0.978094		12.3696	0.970273		12.3696	0.974356		12.3696	0.975546		12.3696	0.975327		12.3696	0.966245		12.3696	0.96256		12.3696	0.955928
12.4441	0.970697		12.4441	0.968741		12.4441	0.966674		12.4441	0.97572		12.4441	0.971221		12.4441	0.976752		12.4441	0.982042		12.4441	0.982252		12.4441	0.979357		12.4441	0.972023		12.4441	0.975053		12.4441	0.977232		12.4441	0.976398		12.4441	0.966972		12.4441	0.963198		12.4441	0.958277
12.5186	0.97112		12.5186	0.969144		12.5186	0.967477		12.5186	0.975987		12.5186	0.972857		12.5186	0.977687		12.5186	0.983114		12.5186	0.982665		12.5186	0.979988		12.5186	0.973276		12.5186	0.975844		12.5186	0.977734		12.5186	0.977069		12.5186	0.968285		12.5186	0.964519		12.5186	0.957406
12.5931	0.971407		12.5931	0.970408		12.5931	0.969467		12.5931	0.976719		12.5931	0.973611		12.5931	0.978889		12.5931	0.983472		12.5931	0.984013		12.5931	0.9806		12.5931	0.973883		12.5931	0.977983		12.5931	0.979041		12.5931	0.977726		12.5931	0.968985		12.5931	0.964301		12.5931	0.957093
12.6677	0.972701		12.6677	0.971044		12.6677	0.969189		12.6677	0.978507		12.6677	0.974809		12.6677	0.979307		12.6677	0.984361		12.6677	0.984633		12.6677	0.982069		12.6677	0.975385		12.6677	0.97783		12.6677	0.979103		12.6677	0.978439		12.6677	0.969398		12.6677	0.96614		12.6677	0.95862
12.7422	0.973966		12.7422	0.972306		12.7422	0.969687		12.7422	0.978504		12.7422	0.974444		12.7422	0.980678		12.7422	0.985588		12.7422	0.985802		12.7422	0.982425		12.7422	0.975964		12.7422	0.97949		12.7422	0.980139		12.7422	0.979794		12.7422	0.970288		12.7422	0.965886		12.7422	0.957976
12.8167	0.973366		12.8167	0.972337		12.8167	0.971499		12.8167	0.97989		12.8167	0.977187		12.8167	0.980506		12.8167	0.98697		12.8167	0.987078		12.8167	0.983641		12.8167	0.977181		12.8167	0.980374		12.8167	0.980901		12.8167	0.979924		12.8167	0.970488		12.8167	0.966462		12.8167	0.960299
12.8912	0.975926		12.8912	0.973427		12.8912	0.971809		12.8912	0.980895		12.8912	0.977257		12.8912	0.982824		12.8912	0.98705		12.8912	0.987953		12.8912	0.985216		12.8912	0.97773		12.8912	0.980655		12.8912	0.982453		12.8912	0.980781		12.8912	0.971604		12.8912	0.9667		12.8912	0.959044
12.9657	0.97539		12.9657	0.974837		12.9657	0.973802		12.9657	0.981431		12.9657	0.977959		12.9657	0.98313		12.9657	0.987437		12.9657	0.988528		12.9657	0.984686		12.9657	0.977526		12.9657	0.981488		12.9657	0.982676		12.9657	0.981694		12.9657	0.972267		12.9657	0.968331		12.9657	0.961572
13.0402	0.977266		13.0402	0.975305		13.0402	0.973517		13.0402	0.981943		13.0402	0.979372		13.0402	0.984267		13.0402	0.988799		13.0402	0.989548		13.0402	0.986097		13.0402	0.978026		13.0402	0.982293		13.0402	0.983735		13.0402	0.983182		13.0402	0.972323		13.0402	0.969477		13.0402	0.96158
13.1147	0.977426		13.1147	0.974569		13.1147	0.974657		13.1147	0.983281		13.1147	0.980297		13.1147	0.98525		13.1147	0.989817		13.1147	0.99051		13.1147	0.98653		13.1147	0.979202		13.1147	0.98262		13.1147	0.984159		13.1147	0.983426		13.1147	0.973768		13.1147	0.969613		13.1147	0.961677
13.1893	0.97839		13.1893	0.977293		13.1893	0.975435		13.1893	0.984079		13.1893	0.980643		13.1893	0.986387		13.1893	0.990603		13.1893	0.991056		13.1893	0.986793		13.1893	0.980379		13.1893	0.983373		13.1893	0.984798		13.1893	0.985131		13.1893	0.974434		13.1893	0.970102		13.1893	0.962261
13.2638	0.977232		13.2638	0.97721		13.2638	0.975847		13.2638	0.98566		13.2638	0.981678		13.2638	0.986508		13.2638	0.991091		13.2638	0.992343		13.2638	0.98827		13.2638	0.982202		13.2638	0.984084		13.2638	0.985015		13.2638	0.985263		13.2638	0.975821		13.2638	0.972061		13.2638	0.963959
13.3383	0.979357		13.3383	0.977821		13.3383	0.975795		13.3383	0.98582		13.3383	0.983213		13.3383	0.987499		13.3383	0.992005		13.3383	0.991859		13.3383	0.989143		13.3383	0.981186		13.3383	0.984861		13.3383	0.987084		13.3383	0.985585		13.3383	0.976825		13.3383	0.971721		13.3383	0.963762
13.4128	0.979919		13.4128	0.979087		13.4128	0.97707		13.4128	0.986156		13.4128	0.984389		13.4128	0.988425		13.4128	0.993183		13.4128	0.993772		13.4128	0.99011		13.4128	0.981606		13.4128	0.986391		13.4128	0.987144		13.4128	0.98656		13.4128	0.977169		13.4128	0.972713		13.4128	0.964104
13.4873	0.980652		13.4873	0.979217		13.4873	0.978067		13.4873	0.987514		13.4873	0.983439		13.4873	0.988934		13.4873	0.994536		13.4873	0.994145		13.4873	0.989975		13.4873	0.983936		13.4873	0.986082		13.4873	0.988621		13.4873	0.986955		13.4873	0.977592		13.4873	0.973301		13.4873	0.964514
13.5618	0.982454		13.5618	0.979985		13.5618	0.978875		13.5618	0.988825		13.5618	0.984674		13.5618	0.990273		13.5618	0.995098		13.5618	0.995172		13.5618	0.991762		13.5618	0.984417		13.5618	0.988187		13.5618	0.988072		13.5618	0.987628		13.5618	0.978162		13.5618	0.974156		13.5618	0.965407
13.6364	0.982559		13.6364	0.981466		13.6364	0.979412		13.6364	0.989123		13.6364	0.985182		13.6364	0.990877		13.6364	0.996048		13.6364	0.995162		13.6364	0.992249		13.6364	0.985461		13.6364	0.988982		13.6364	0.988553		13.6364	0.989138		13.6364	0.979285		13.6364	0.974594		13.6364	0.965817
13.7109	0.983293		13.7109	0.981787		13.7109	0.979807		13.7109	0.98931		13.7109	0.986496		13.7109	0.991693		13.7109	0.996652		13.7109	0.996056		13.7109	0.992718		13.7109	0.984342		13.7109	0.989394		13.7109	0.99055		13.7109	0.989416		13.7109	0.980209		13.7109	0.975408		13.7109	0.965765
13.7854	0.984302		13.7854	0.982157		13.7854	0.981767		13.7854	0.991885		13.7854	0.987472		13.7854	0.992734		13.7854	0.998565		13.7854	0.997672		13.7854	0.993276		13.7854	0.986951		13.7854	0.989434		13.7854	0.990594		13.7854	0.991041		13.7854	0.979792		13.7854	0.976573		13.7854	0.966767
13.8599	0.984765		13.8599	0.984255		13.8599	0.981617		13.8599	0.991085		13.8599	0.987373		13.8599	0.993858		13.8599	0.998178		13.8599	0.998682		13.8599	0.993966		13.8599	0.987074		13.8599	0.990797		13.8599	0.990788		13.8599	0.991424		13.8599	0.980731		13.8599	0.976781		13.8599	0.968025
13.9344	0.986493		13.9344	0.984074		13.9344	0.982833		13.9344	0.991331		13.9344	0.989091		13.9344	0.993349		13.9344	0.999437		13.9344	0.999117		13.9344	0.995054		13.9344	0.988208		13.9344	0.991951		13.9344	0.992311		13.9344	0.99207		13.9344	0.98117		13.9344	0.977818		13.9344	0.968408
14.0089	0.986997		14.0089	0.985038		14.0089	0.9816		14.0089	0.992291		14.0089	0.988904		14.0089	0.99424		14.0089	0.999548		14.0089	0.999918		14.0089	0.996461		14.0089	0.988605		14.0089	0.991984		14.0089	0.993071		14.0089	0.993003		14.0089	0.982313		14.0089	0.977988		14.0089	0.967813
14.0834	0.987112		14.0834	0.984652		14.0834	0.983353		14.0834	0.993279		14.0834	0.990677		14.0834	0.996227		14.0834	1.00054		14.0834	1.00041		14.0834	0.996704		14.0834	0.98966		14.0834	0.993126		14.0834	0.993028		14.0834	0.993636		14.0834	0.983351		14.0834	0.97779		14.0834	0.96925
14.158	0.988008		14.158	0.985842		14.158	0.985355		14.158	0.994222		14.158	0.991824		14.158	0.997344		14.158	1.00188		14.158	1.00131		14.158	0.998109		14.158	0.990222		14.158	0.993328		14.158	0.993359		14.158	0.99447		14.158	0.984033		14.158	0.978428		14.158	0.969209
14.2325	0.988841		14.2325	0.986538		14.2325	0.986473		14.2325	0.995319		14.2325	0.991986		14.2325	0.997536		14.2325	1.00223		14.2325	1.00237		14.2325	0.997886		14.2325	0.990356		14.2325	0.995288		14.2325	0.994432		14.2325	0.99485		14.2325	0.983816		14.2325	0.980001		14.2325	0.970449
14.307	0.989186		14.307	0.987993		14.307	0.986488		14.307	0.995772		14.307	0.99168		14.307	0.998944		14.307	1.00333		14.307	1.00274		14.307	0.999217		14.307	0.991922		14.307	0.995752		14.307	0.995681		14.307	0.996087		14.307	0.98513		14.307	0.9795		14.307	0.970516
14.3815	0.991028		14.3815	0.987882		14.3815	0.987835		14.3815	0.996842		14.3815	0.993		14.3815	0.998912		14.3815	1.00477		14.3815	1.00397		14.3815	1.0001		14.3815	0.993468		14.3815	0.995694		14.3815	0.995981		14.3815	0.995957		14.3815	0.985608		14.3815	0.980911		14.3815	0.97087
14.456	0.99139		14.456	0.989043		14.456	0.98753		14.456	0.998076		14.456	0.99374		14.456	0.999896		14.456	1.00469		14.456	1.0038		14.456	1.00076		14.456	0.993571		14.456	0.996264		14.456	0.996779		14.456	0.997538		14.456	0.986289		14.456	0.981489		14.456	0.971391
14.5305	0.992559		14.5305	0.989609		14.5305	0.988253		14.5305	0.997577		14.5305	0.995062		14.5305	0.999959		14.5305	1.00582		14.5305	1.00407		14.5305	1.00155		14.5305	0.99393		14.5305	0.998078		14.5305	0.997237		14.5305	0.99742		14.5305	0.986716		14.5305	0.982792		14.5305	0.971521
14.6051	0.992201		14.6051	0.990102		14.6051	0.988858		14.6051	0.999336		14.6051	0.995345		14.6051	1.00111		14.6051	1.00722		14.6051	1.0047		14.6051	1.00106		14.6051	0.99444		14.6051	0.998807		14.6051	0.998266		14.6051	0.998465		14.6051	0.987796		14.6051	0.983248		14.6051	0.972653
14.6796	0.993416		14.6796	0.991953		14.6796	0.988775		14.6796	1.00007		14.6796	0.99627		14.6796	1.0021		14.6796	1.00754		14.6796	1.00565		14.6796	1.00275		14.6796	0.995511		14.6796	0.998425		14.6796	0.997784		14.6796	0.998579		14.6796	0.988096		14.6796	0.983176		14.6796	0.973022
14.7541	0.994346		14.7541	0.992433		14.7541	0.991303		14.7541	1.00041		14.7541	0.996534		14.7541	1.00337		14.7541	1.00876		14.7541	1.00593		14.7541	1.00412		14.7541	0.996942		14.7541	0.999931		14.7541	0.998875		14.7541	0.999711		14.7541	0.988597		14.7541	0.983614		14.7541	0.974232
14.8286	0.994306		14.8286	0.993074		14.8286	0.990131		14.8286	1.00076		14.8286	0.997502		14.8286	1.00368		14.8286	1.00835		14.8286	1.00761		14.8286	1.00411		14.8286	0.997521		14.8286	1.0005		14.8286	0.999986		14.8286	0.999819		14.8286	0.988865		14.8286	0.984371		14.8286	0.974734
14.9031	0.994993		14.9031	0.994012		14.9031	0.990961		14.9031	1.00223		14.9031	0.998704		14.9031	1.00432		14.9031	1.00985		14.9031	1.00719		14.9031	1.00473		14.9031	0.997584		14.9031	1.00091		14.9031	1.00059		14.9031	1.00099		14.9031	0.990399		14.9031	0.985145		14.9031	0.975181
14.9776	0.99658		14.9776	0.995066		14.9776	0.992526		14.9776	1.00207		14.9776	0.998539		14.9776	1.00516		14.9776	1.01078		14.9776	1.00807		14.9776	1.00606		14.9776	0.998174		14.9776	1.00073		14.9776	1.00054		14.9776	1.00152		14.9776	0.990694		14.9776	0.985559		14.9776	0.974794
15.0522	0.997015		15.0522	0.99566		15.0522	0.992073		15.0522	1.00229		15.0522	0.999678		15.0522	1.00627		15.0522	1.01172		15.0522	1.0097		15.0522	1.00677		15.0522	0.998963		15.0522	1.00254		15.0522	1.00209		15.0522	1.002		15.0522	0.992039		15.0522	0.98649		15.0522	0.977788
15.1267	0.996993		15.1267	0.995508		15.1267	0.994861		15.1267	1.00341		15.1267	1.00098		15.1267	1.00699		15.1267	1.0116		15.1267	1.0102		15.1267	1.00774		15.1267	1.00098		15.1267	1.00344		15.1267	1.0019		15.1267	1.00287		15.1267	0.99174		15.1267	0.987436		15.1267	0.977036
15.2012	0.998871		15.2012	0.995853		15.2012	0.994506		15.2012	1.00508		15.2012	1.0004		15.2012	1.00734		15.2012	1.0126		15.2012	1.01094		15.2012	1.00827		15.2012	1.00047		15.2012	1.00354		15.2012	1.00284		15.2012	1.00317		15.2012	0.992416		15.2012	0.987278		15.2012	0.975185
15.2757	0.999475		15.2757	0.997656		15.2757	0.995043		15.2757	1.0051		15.2757	1.0017		15.2757	1.00851		15.2757	1.01333		15.2757	1.01149		15.2757	1.00871		15.2757	1.00194		15.2757	1.005		15.2757	1.00316		15.2757	1.00445		15.2757	0.993199		15.2757	0.988285		15.2757	0.976868
15.3502	0.999514		15.3502	0.997795		15.3502	0.995291		15.3502	1.00579		15.3502	1.00231		15.3502	1.00944		15.3502	1.01387		15.3502	1.01189		15.3502	1.00936		15.3502	1.00143		15.3502	1.00529		15.3502	1.00475		15.3502	1.00446		15.3502	0.993391		15.3502	0.989491		15.3502	0.975256
15.4247	1.00034		15.4247	0.999085		15.4247	0.996801		15.4247	1.00682		15.4247	1.0036		15.4247	1.00968		15.4247	1.01521		15.4247	1.01229		15.4247	1.01041		15.4247	1.00189		15.4247	1.00554		15.4247	1.0044		15.4247	1.00561		15.4247	0.993828		15.4247	0.989757		15.4247	0.977769
15.4992	1.00187		15.4992	1.00038		15.4992	0.997921		15.4992	1.00749		15.4992	1.00395		15.4992	1.01029		15.4992	1.01561		15.4992	1.01417		15.4992	1.01148		15.4992	1.00367		15.4992	1.00734		15.4992	1.00517		15.4992	1.00665		15.4992	0.994599		15.4992	0.990352		15.4992	0.977587
15.5738	1.0015		15.5738	1.00049		15.5738	0.998746		15.5738	1.00817		15.5738	1.00492		15.5738	1.01062		15.5738	1.01669		15.5738	1.01363		15.5738	1.01185		15.5738	1.0048		15.5738	1.00785		15.5738	1.00625		15.5738	1.00739		15.5738	0.995328		15.5738	0.990308		15.5738	0.978961
15.6483	1.00323		15.6483	1.0011		15.6483	0.998366		15.6483	1.00878		15.6483	1.00447		15.6483	1.01281		15.6483	1.01588		15.6483	1.01473		15.6483	1.0132		15.6483	1.00544		15.6483	1.00823		15.6483	1.00606		15.6483	1.00765		15.6483	0.996105		15.6483	0.990358		15.6483	0.97851
15.7228	1.00295		15.7228	1.00183		15.7228	0.998964		15.7228	1.00951		15.7228	1.00495		15.7228	1.01236		15.7228	1.01765		15.7228	1.01559		15.7228	1.01272		15.7228	1.00686		15.7228	1.0094		15.7228	1.00793		15.7228	1.00827		15.7228	0.996948		15.7228	0.991714		15.7228	0.980774
15.7973	1.00306		15.7973	1.0018		15.7973	0.999986		15.7973	1.01109		15.7973	1.00558		15.7973	1.01398		15.7973	1.01807		15.7973	1.01543		15.7973	1.01419		15.7973	1.00622		15.7973	1.00953		15.7973	1.0083		15.7973	1.00878		15.7973	0.997299		15.7973	0.992567		15.7973	0.980912
15.8718	1.00515		15.8718	1.00244		15.8718	1.00044		15.8718	1.01238		15.8718	1.00614		15.8718	1.01411		15.8718	1.01874		15.8718	1.01692		15.8718	1.01438		15.8718	1.00619		15.8718	1.00944		15.8718	1.00804		15.8718	1.00881		15.8718	0.997704		15.8718	0.992337		15.8718	0.981232
15.9463	1.00448		15.9463	1.0025		15.9463	1.002		15.9463	1.01192		15.9463	1.00808		15.9463	1.01418		15.9463	1.0199		15.9463	1.01663		15.9463	1.01478		15.9463	1.00721		15.9463	1.00984		15.9463	1.00866		15.9463	1.00952		15.9463	0.999499		15.9463	0.99447		15.9463	0.982371
16.0209	1.00545		16.0209	1.00314		16.0209	1.00138		16.0209	1.01242		16.0209	1.00831		16.0209	1.01498		16.0209	1.02018		16.0209	1.01804		16.0209	1.01587		16.0209	1.00824		16.0209	1.01057		16.0209	1.01075		16.0209	1.0104		16.0209	0.998608		16.0209	0.994586		16.0209	0.982271
16.0954	1.00603		16.0954	1.00403		16.0954	1.00208		16.0954	1.01338		16.0954	1.00976		16.0954	1.01625		16.0954	1.0204		16.0954	1.01848		16.0954	1.01697		16.0954	1.00872		16.0954	1.01165		16.0954	1.00952		16.0954	1.01086		16.0954	0.999713		16.0954	0.99445		16.0954	0.982721
16.1699	1.00736		16.1699	1.00468		16.1699	1.00321		16.1699	1.01355		16.1699	1.00918		16.1699	1.01684		16.1699	1.02173		16.1699	1.0188		16.1699	1.01736		16.1699	1.00881		16.1699	1.01224		16.1699	1.0112		16.1699	1.01178		16.1699	1.00039		16.1699	0.994288		16.1699	0.982379
16.2444	1.00805		16.2444	1.00542		16.2444	1.00392		16.2444	1.01327		16.2444	1.01055		16.2444	1.01773		16.2444	1.02224		16.2444	1.01968		16.2444	1.0177		16.2444	1.00994		16.2444	1.01258		16.2444	1.01092		16.2444	1.01219		16.2444	1.00041		16.2444	0.995362		16.2444	0.984132
16.3189	1.00742		16.3189	1.0054		16.3189	1.00533		16.3189	1.01496		16.3189	1.01029		16.3189	1.01833		16.3189	1.02308		16.3189	1.02073		16.3189	1.0178		16.3189	1.0113		16.3189	1.01407		16.3189	1.01155		16.3189	1.013		16.3189	1.00098		16.3189	0.996249		16.3189	0.983905
16.3934	1.00912		16.3934	1.00671		16.3934	1.005		16.3934	1.01626		16.3934	1.01135		16.3934	1.0194		16.3934	1.02373		16.3934	1.0208		16.3934	1.02038		16.3934	1.01167		16.3934	1.01478		16.3934	1.01238		16.3934	1.01334		16.3934	1.00193		16.3934	0.997255		16.3934	0.984501
16.4679	1.00924		16.4679	1.00809		16.4679	1.00599		16.4679	1.0156		16.4679	1.01269		16.4679	1.01922		16.4679	1.0245		16.4679	1.02196		16.4679	1.02005		16.4679	1.01254		16.4679	1.01459		16.4679	1.01364		16.4679	1.01382		16.4679	1.00274		16.4679	0.996643		16.4679	0.984479
16.5425	1.01024		16.5425	1.00713		16.5425	1.0064		16.5425	1.01741		16.5425	1.01337		16.5425	1.02098		16.5425	1.02558		16.5425	1.02252		16.5425	1.02085		16.5425	1.01285		16.5425	1.01601		16.5425	1.01356		16.5425	1.01452		16.5425	1.00305		16.5425	0.997631		16.5425	0.985059
16.617	1.01106		16.617	1.00924		16.617	1.00703		16.617	1.01778		16.617	1.01268		16.617	1.02101		16.617	1.02607		16.617	1.02261		16.617	1.02178		16.617	1.0129		16.617	1.01592		16.617	1.01435		16.617	1.01524		16.617	1.00345		16.617	0.998234		16.617	0.985696
16.6915	1.01182		16.6915	1.0088		16.6915	1.00714		16.6915	1.01732		16.6915	1.01439		16.6915	1.02202		16.6915	1.02696		16.6915	1.02363		16.6915	1.02215		16.6915	1.01412		16.6915	1.01685		16.6915	1.01486		16.6915	1.01593		16.6915	1.00397		16.6915	0.9984		16.6915	0.986184
16.766	1.01074		16.766	1.00948		16.766	1.00718		16.766	1.01843		16.766	1.01412		16.766	1.0229		16.766	1.02742		16.766	1.02546		16.766	1.02153		16.766	1.01416		16.766	1.01669		16.766	1.01534		16.766	1.01589		16.766	1.00489		16.766	0.999847		16.766	0.986452
16.8405	1.01221		16.8405	1.01068		16.8405	1.01049		16.8405	1.0188		16.8405	1.01533		16.8405	1.02378		16.8405	1.02759		16.8405	1.0258		16.8405	1.02387		16.8405	1.01571		16.8405	1.01818		16.8405	1.01542		16.8405	1.01681		16.8405	1.00445		16.8405	0.99944		16.8405	0.987331
16.915	1.01294		16.915	1.01005		16.915	1.01017		16.915	1.01947		16.915	1.01556		16.915	1.0233		16.915	1.02779		16.915	1.0263		16.915	1.02368		16.915	1.01562		16.915	1.01868		16.915	1.0161		16.915	1.01782		16.915	1.00595		16.915	1.00006		16.915	0.987215
16.9896	1.01258		16.9896	1.01121		16.9896	1.00954		16.9896	1.02092		16.9896	1.01721		16.9896	1.0243		16.9896	1.02917		16.9896	1.02698		16.9896	1.02568		16.9896	1.01551		16.9896	1.01908		16.9896	1.01773		16.9896	1.01758		16.9896	1.00637		16.9896	1.00145		16.9896	0.986485
17.0641	1.01411		17.0641	1.01207		17.0641	1.01033		17.0641	1.02113		17.0641	1.01805		17.0641	1.02485		17.0641	1.02912		17.0641	1.0278		17.0641	1.02516		17.0641	1.01614		17.0641	1.01973		17.0641	1.01608		17.0641	1.01862		17.0641	1.00663		17.0641	1.00172		17.0641	0.989468
17.1386	1.01404		17.1386	1.01263		17.1386	1.01156		17.1386	1.02202		17.1386	1.01782		17.1386	1.02558		17.1386	1.03049		17.1386	1.02773		17.1386	1.02617		17.1386	1.017		17.1386	1.02001		17.1386	1.01804		17.1386	1.01864		17.1386	1.00749		17.1386	1.00162		17.1386	0.988827
17.2131	1.01557		17.2131	1.01347		17.2131	1.01082		17.2131	1.02232		17.2131	1.01832		17.2131	1.02632		17.2131	1.0311		17.2131	1.02707		17.2131	1.02691		17.2131	1.01719		17.2131	1.02062		17.2131	1.01817		17.2131	1.01994		17.2131	1.00771		17.2131	1.00163		17.2131	0.988072
17.2876	1.01512		17.2876	1.01422		17.2876	1.01188		17.2876	1.02323		17.2876	1.01853		17.2876	1.02763		17.2876	1.03183		17.2876	1.02949		17.2876	1.02652		17.2876	1.01821		17.2876	1.02155		17.2876	1.01928		17.2876	1.02005		17.2876	1.00828		17.2876	1.00337		17.2876	0.988638
17.3621	1.01628		17.3621	1.01446		17.3621	1.01227		17.3621	1.02357		17.3621	1.02017		17.3621	1.0277		17.3621	1.03255		17.3621	1.02912		17.3621	1.02723		17.3621	1.01893		17.3621	1.0214		17.3621	1.01876		17.3621	1.02057		17.3621	1.00923		17.3621	1.00253		17.3621	0.988485
17.4366	1.01778		17.4366	1.01484		17.4366	1.01386		17.4366	1.0245		17.4366	1.02059		17.4366	1.02968		17.4366	1.03363		17.4366	1.03059		17.4366	1.02821		17.4366	1.02029		17.4366	1.02246		17.4366	1.01991		17.4366	1.02099		17.4366	1.00812		17.4366	1.00282		17.4366	0.990358
17.5112	1.01765		17.5112	1.01506		17.5112	1.01405		17.5112	1.02477		17.5112	1.02167		17.5112	1.02927		17.5112	1.03337		17.5112	1.0306		17.5112	1.0288		17.5112	1.02003		17.5112	1.02376		17.5112	1.01964		17.5112	1.02191		17.5112	1.0098		17.5112	1.0028		17.5112	0.99041
17.5857	1.01829		17.5857	1.01467		17.5857	1.01583		17.5857	1.0247		17.5857	1.02266		17.5857	1.03018		17.5857	1.03458		17.5857	1.03037		17.5857	1.0299		17.5857	1.02006		17.5857	1.02322		17.5857	1.02045		17.5857	1.02243		17.5857	1.01039		17.5857	1.0034		17.5857	0.991795
17.6602	1.01807		17.6602	1.01602		17.6602	1.01669		17.6602	1.02618		17.6602	1.02143		17.6602	1.03034		17.6602	1.03465		17.6602	1.0311		17.6602	1.03021		17.6602	1.02187		17.6602	1.0242		17.6602	1.02131		17.6602	1.02314		17.6602	1.01011		17.6602	1.00484		17.6602	0.992156
17.7347	1.01861		17.7347	1.01708		17.7347	1.0151		17.7347	1.02636		17.7347	1.02341		17.7347	1.03126		17.7347	1.03462		17.7347	1.03297		17.7347	1.03095		17.7347	1.02115		17.7347	1.02422		17.7347	1.02226		17.7347	1.02271		17.7347	1.0114		17.7347	1.00476		17.7347	0.990522
17.8092	1.0197		17.8092	1.01762		17.8092	1.01614		17.8092	1.02686		17.8092	1.02299		17.8092	1.03076		17.8092	1.03579		17.8092	1.03354		17.8092	1.03121		17.8092	1.02201		17.8092	1.02501		17.8092	1.02309		17.8092	1.02407		17.8092	1.01174		17.8092	1.00512		17.8092	0.990738
17.8837	1.02088		17.8837	1.01782		17.8837	1.01726		17.8837	1.02883		17.8837	1.02508		17.8837	1.03294		17.8837	1.03641		17.8837	1.03381		17.8837	1.03171		17.8837	1.0224		17.8837	1.02595		17.8837	1.02247		17.8837	1.02415		17.8837	1.01184		17.8837	1.00615		17.8837	0.992625
17.9583	1.02023		17.9583	1.01801		17.9583	1.01645		17.9583	1.02868		17.9583	1.02402		17.9583	1.0334		17.9583	1.03694		17.9583	1.0353		17.9583	1.03172		17.9583	1.02309		17.9583	1.0267		17.9583	1.02348		17.9583	1.02493		17.9583	1.013		17.9583	1.00597		17.9583	0.992812
18.0328	1.0212		18.0328	1.01932		18.0328	1.01771		18.0328	1.02782		18.0328	1.02468		18.0328	1.03383		18.0328	1.0379		18.0328	1.03555		18.0328	1.03324		18.0328	1.02406		18.0328	1.02715		18.0328	1.02346		18.0328	1.02575		18.0328	1.01396		18.0328	1.00745		18.0328	0.992056
18.1073	1.02221		18.1073	1.01939		18.1073	1.01896		18.1073	1.02953		18.1073	1.02574		18.1073	1.03464		18.1073	1.03915		18.1073	1.03534		18.1073	1.03314		18.1073	1.02426		18.1073	1.02794		18.1073	1.02411		18.1073	1.02576		18.1073	1.01351		18.1073	1.00834		18.1073	0.99299
18.1818	1.02204		18.1818	1.02037		18.1818	1.01908		18.1818	1.02991		18.1818	1.02542		18.1818	1.03454		18.1818	1.03937		18.1818	1.0355		18.1818	1.03451		18.1818	1.02448		18.1818	1.02804		18.1818	1.02372		18.1818	1.0268		18.1818	1.01385		18.1818	1.00827		18.1818	0.992622
18.2563	1.02273		18.2563	1.01913		18.2563	1.01941		18.2563	1.03004		18.2563	1.02686		18.2563	1.03571		18.2563	1.03909		18.2563	1.03625		18.2563	1.03372		18.2563	1.02606		18.2563	1.02843		18.2563	1.02392		18.2563	1.02706		18.2563	1.01507		18.2563	1.00824		18.2563	0.992782
18.3308	1.023		18.3308	1.02072		18.3308	1.0198		18.3308	1.03081		18.3308	1.0272		18.3308	1.03633		18.3308	1.04063		18.3308	1.03726		18.3308	1.03555		18.3308	1.02506		18.3308	1.02841		18.3308	1.02563		18.3308	1.02778		18.3308	1.0148		18.3308	1.00904		18.3308	0.993418
18.4054	1.02443		18.4054	1.02009		18.4054	1.02003		18.4054	1.03089		18.4054	1.02854		18.4054	1.0369		18.4054	1.04023		18.4054	1.03759		18.4054	1.03581		18.4054	1.02595		18.4054	1.02973		18.4054	1.02557		18.4054	1.02735		18.4054	1.01568		18.4054	1.00963		18.4054	0.993582
18.4799	1.02461		18.4799	1.02151		18.4799	1.02173		18.4799	1.03258		18.4799	1.02782		18.4799	1.03633		18.4799	1.04184		18.4799	1.03811		18.4799	1.03659		18.4799	1.02677		18.4799	1.02967		18.4799	1.02547		18.4799	1.02802		18.4799	1.01614		18.4799	1.01		18.4799	0.996122
18.5544	1.02572		18.5544	1.02235		18.5544	1.02073		18.5544	1.03262		18.5544	1.02915		18.5544	1.03698		18.5544	1.04078		18.5544	1.04011		18.5544	1.03633		18.5544	1.02717		18.5544	1.03072		18.5544	1.0265		18.5544	1.0287		18.5544	1.017		18.5544	1.01006		18.5544	0.995827
18.6289	1.02582		18.6289	1.02285		18.6289	1.02188		18.6289	1.03215		18.6289	1.02879		18.6289	1.03814		18.6289	1.04275		18.6289	1.0391		18.6289	1.03672		18.6289	1.02761		18.6289	1.03129		18.6289	1.02731		18.6289	1.02869		18.6289	1.01685		18.6289	1.01051		18.6289	0.995221
18.7034	1.02533		18.7034	1.024		18.7034	1.02264		18.7034	1.03176		18.7034	1.02878		18.7034	1.04027		18.7034	1.04312		18.7034	1.04005		18.7034	1.03722		18.7034	1.02902		18.7034	1.03121		18.7034	1.02763		18.7034	1.02923		18.7034	1.01698		18.7034	1.01104		18.7034	0.995317
18.7779	1.02625		18.7779	1.02388		18.7779	1.02276		18.7779	1.03371		18.7779	1.03093		18.7779	1.03807		18.7779	1.04365		18.7779	1.04033		18.7779	1.038		18.7779	1.02881		18.7779	1.03219		18.7779	1.02822		18.7779	1.02951		18.7779	1.01775		18.7779	1.01127		18.7779	0.99636
18.8524	1.02696		18.8524	1.02417		18.8524	1.02329		18.8524	1.03469		18.8524	1.03077		18.8524	1.03913		18.8524	1.04448		18.8524	1.04132		18.8524	1.03846		18.8524	1.02894		18.8524	1.03286		18.8524	1.02908		18.8524	1.03097		18.8524	1.01844		18.8524	1.01222		18.8524	0.996293
18.927	1.02667		18.927	1.02484		18.927	1.02349		18.927	1.03485		18.927	1.03204		18.927	1.03977		18.927	1.04465		18.927	1.04206		18.927	1.03915		18.927	1.02974		18.927	1.03335		18.927	1.02954		18.927	1.03084		18.927	1.01868		18.927	1.01162		18.927	0.997689
19.0015	1.02832		19.0015	1.02456		19.0015	1.02398		19.0015	1.03505		19.0015	1.03212		19.0015	1.04162		19.0015	1.04559		19.0015	1.04315		19.0015	1.03873		19.0015	1.03005		19.0015	1.03345		19.0015	1.02844		19.0015	1.0317		19.0015	1.01959		19.0015	1.01202		19.0015	0.997473
19.076	1.02835		19.076	1.02476		19.076	1.02425		19.076	1.03599		19.076	1.03243		19.076	1.04213		19.076	1.04505		19.076	1.04395		19.076	1.04		19.076	1.03075		19.076	1.03396		19.076	1.03008		19.076	1.0324		19.076	1.01877		19.076	1.01264		19.076	0.999149
19.1505	1.02854		19.1505	1.02603		19.1505	1.0256		19.1505	1.03537		19.1505	1.03264		19.1505	1.04207		19.1505	1.04611		19.1505	1.04379		19.1505	1.04072		19.1505	1.03072		19.1505	1.03419		19.1505	1.03068		19.1505	1.03301		19.1505	1.01922		19.1505	1.0128		19.1505	0.997019
19.225	1.02863		19.225	1.02673		19.225	1.02533		19.225	1.0363		19.225	1.03403		19.225	1.04204		19.225	1.04664		19.225	1.04499		19.225	1.0407		19.225	1.03104		19.225	1.03497		19.225	1.03156		19.225	1.0328		19.225	1.02104		19.225	1.01292		19.225	0.997708
19.2995	1.03013		19.2995	1.02692		19.2995	1.02634		19.2995	1.03692		19.2995	1.03337		19.2995	1.04352		19.2995	1.04681		19.2995	1.04453		19.2995	1.04185		19.2995	1.03232		19.2995	1.03508		19.2995	1.03165		19.2995	1.03339		19.2995	1.02079		19.2995	1.01354		19.2995	0.998013
19.3741	1.03011		19.3741	1.02715		19.3741	1.0262		19.3741	1.03702		19.3741	1.03446		19.3741	1.04358		19.3741	1.04774		19.3741	1.04612		19.3741	1.04156		19.3741	1.03252		19.3741	1.0355		19.3741	1.03154		19.3741	1.03363		19.3741	1.02151		19.3741	1.01435		19.3741	0.999592
19.4486	1.03022		19.4486	1.02754		19.4486	1.02736		19.4486	1.03765		19.4486	1.03577		19.4486	1.04408		19.4486	1.04787		19.4486	1.04648		19.4486	1.04175		19.4486	1.033		19.4486	1.03541		19.4486	1.03139		19.4486	1.03377		19.4486	1.02162		19.4486	1.01499		19.4486	0.999037
19.5231	1.03104		19.5231	1.02845		19.5231	1.02779		19.5231	1.03779		19.5231	1.03459		19.5231	1.0448		19.5231	1.04808		19.5231	1.04733		19.5231	1.0425		19.5231	1.03368		19.5231	1.03654		19.5231	1.03234		19.5231	1.03508		19.5231	1.02177		19.5231	1.01503		19.5231	1.00002
19.5976	1.03144		19.5976	1.0281		19.5976	1.02781		19.5976	1.03889		19.5976	1.03541		19.5976	1.04518		19.5976	1.04949		19.5976	1.0471		19.5976	1.04257		19.5976	1.03358		19.5976	1.0368		19.5976	1.03262		19.5976	1.0347		19.5976	1.02205		19.5976	1.01499		19.5976	0.998933
19.6721	1.03191		19.6721	1.02869		19.6721	1.02986		19.6721	1.03968		19.6721	1.03552		19.6721	1.04577		19.6721	1.04997		19.6721	1.04838		19.6721	1.04334		19.6721	1.03502		19.6721	1.03775		19.6721	1.03261		19.6721	1.03527		19.6721	1.02282		19.6721	1.01536		19.6721	1.00112
19.7466	1.03163		19.7466	1.03		19.7466	1.02921		19.7466	1.04011		19.7466	1.03703		19.7466	1.04654		19.7466	1.05001		19.7466	1.0488		19.7466	1.04363		19.7466	1.03511		19.7466	1.03765		19.7466	1.03402		19.7466	1.0359		19.7466	1.02357		19.7466	1.01572		19.7466	1.00205
19.8211	1.03364		19.8211	1.03003		19.8211	1.02937		19.8211	1.04058		19.8211	1.03718		19.8211	1.04656		19.8211	1.05076		19.8211	1.04969		19.8211	1.04345		19.8211	1.03554		19.8211	1.03833		19.8211	1.03296		19.8211	1.03627		19.8211	1.02337		19.8211	1.01675		19.8211	0.999514
19.8957	1.03345		19.8957	1.03084		19.8957	1.02997		19.8957	1.04098		19.8957	1.03732		19.8957	1.04734		19.8957	1.05106		19.8957	1.04862		19.8957	1.04508		19.8957	1.03607		19.8957	1.03898		19.8957	1.03392		19.8957	1.03683		19.8957	1.02419		19.8957	1.01747		19.8957	1.00204
19.9702	1.03434		19.9702	1.03084		19.9702	1.03117		19.9702	1.04078		19.9702	1.03731		19.9702	1.04779		19.9702	1.05309		19.9702	1.04956		19.9702	1.04609		19.9702	1.03645		19.9702	1.03994		19.9702	1.03456		19.9702	1.03772		19.9702	1.02404		19.9702	1.01795		19.9702	1.00219
20.0447	1.03422		20.0447	1.03222		20.0447	1.03112		20.0447	1.04201		20.0447	1.03878		20.0447	1.04968		20.0447	1.05148		20.0447	1.05105		20.0447	1.04547		20.0447	1.03619		20.0447	1.03955		20.0447	1.03503		20.0447	1.03772		20.0447	1.02523		20.0447	1.01695		20.0447	1.0017
20.1192	1.03422		20.1192	1.03133		20.1192	1.03158		20.1192	1.04179		20.1192	1.03834		20.1192	1.04929		20.1192	1.05204		20.1192	1.05112		20.1192	1.04602		20.1192	1.03683		20.1192	1.04058		20.1192	1.03595		20.1192	1.0381		20.1192	1.02527		20.1192	1.0178		20.1192	1.0028
20.1937	1.03521		20.1937	1.03289		20.1937	1.0313		20.1937	1.04216		20.1937	1.03898		20.1937	1.04901		20.1937	1.05238		20.1937	1.05195		20.1937	1.04665		20.1937	1.03828		20.1937	1.04102		20.1937	1.03603		20.1937	1.03901		20.1937	1.02583		20.1937	1.0182		20.1937	1.00152
20.2682	1.03554		20.2682	1.03368		20.2682	1.03286		20.2682	1.04279		20.2682	1.03983		20.2682	1.05033		20.2682	1.05246		20.2682	1.0513		20.2682	1.0463		20.2682	1.03837		20.2682	1.04138		20.2682	1.03679		20.2682	1.0387		20.2682	1.02519		20.2682	1.01919		20.2682	1.00426
20.3428	1.03585		20.3428	1.03274		20.3428	1.03328		20.3428	1.0434		20.3428	1.03983		20.3428	1.0493		20.3428	1.05493		20.3428	1.05272		20.3428	1.04654		20.3428	1.03805		20.3428	1.04231		20.3428	1.03626		20.3428	1.03916		20.3428	1.02608		20.3428	1.01875		20.3428	1.00315
20.4173	1.03682		20.4173	1.03404		20.4173	1.03412		20.4173	1.04306		20.4173	1.04128		20.4173	1.04991		20.4173	1.05422		20.4173	1.05343		20.4173	1.04786		20.4173	1.03916		20.4173	1.04215		20.4173	1.03703		20.4173	1.03968		20.4173	1.02717		20.4173	1.01977		20.4173	1.00437
20.4918	1.0361		20.4918	1.03355		20.4918	1.03239		20.4918	1.04432		20.4918	1.04222		20.4918	1.05194		20.4918	1.05503		20.4918	1.05336		20.4918	1.04658		20.4918	1.03899		20.4918	1.0422		20.4918	1.03618		20.4918	1.04025		20.4918	1.02748		20.4918	1.01966		20.4918	1.00337
20.5663	1.03663		20.5663	1.0341		20.5663	1.03413		20.5663	1.04403		20.5663	1.04082		20.5663	1.05141		20.5663	1.05542		20.5663	1.05373		20.5663	1.04766		20.5663	1.03993		20.5663	1.04273		20.5663	1.03759		20.5663	1.04083		20.5663	1.02789		20.5663	1.02008		20.5663	1.00357
20.6408	1.03788		20.6408	1.03473		20.6408	1.03403		20.6408	1.0451		20.6408	1.04172		20.6408	1.05231		20.6408	1.05572		20.6408	1.05564		20.6408	1.0487		20.6408	1.0398		20.6408	1.0434		20.6408	1.03842		20.6408	1.04115		20.6408	1.02848		20.6408	1.02056		20.6408	1.00326
20.7153	1.03854		20.7153	1.0338		20.7153	1.03549		20.7153	1.04502		20.7153	1.04273		20.7153	1.05299		20.7153	1.05576		20.7153	1.05465		20.7153	1.04936		20.7153	1.04114		20.7153	1.04328		20.7153	1.03807		20.7153	1.04156		20.7153	1.02867		20.7153	1.02085		20.7153	1.00318
20.7899	1.03889		20.7899	1.03628		20.7899	1.03454		20.7899	1.04568		20.7899	1.04366		20.7899	1.05248		20.7899	1.05649		20.7899	1.05485		20.7899	1.04985		20.7899	1.04165		20.7899	1.04472		20.7899	1.03919		20.7899	1.04167		20.7899	1.02872		20.7899	1.02271		20.7899	1.00376
20.8644	1.03999		20.8644	1.03621		20.8644	1.03406		20.8644	1.04584		20.8644	1.04419		20.8644	1.05301		20.8644	1.05724		20.8644	1.05651		20.8644	1.04984		20.8644	1.04124		20.8644	1.04468		20.8644	1.03968		20.8644	1.04154		20.8644	1.02926		20.8644	1.02258		20.8644	1.0056
20.9389	1.03956		20.9389	1.03675		20.9389	1.03579		20.9389	1.04594		20.9389	1.04351		20.9389	1.05341		20.9389	1.05795		20.9389	1.05691		20.9389	1.04989		20.9389	1.04197		20.9389	1.0447		20.9389	1.03885		20.9389	1.04243		20.9389	1.02996		20.9389	1.02129		20.9389	1.00536
21.0134	1.04883		21.0134	1.04494		21.0134	1.04487		21.0134	1.05538		21.0134	1.053		21.0134	1.06321		21.0134	1.06715		21.0134	1.0662		21.0134	1.05993		21.0134	1.04931		21.0134	1.05504		21.0134	1.04847		21.0134	1.04568		21.0134	1.03576		21.0134	1.03233		21.0134	1.01448
21.0879	1.07146		21.0879	1.06731		21.0879	1.0664		21.0879	1.07822		21.0879	1.07587		21.0879	1.08736		21.0879	1.08984		21.0879	1.08891		21.0879	1.08078		21.0879	1.07284		21.0879	1.07794		21.0879	1.07042		21.0879	1.07201		21.0879	1.05922		21.0879	1.05258		21.0879	1.03527
21.1624	1.08235		21.1624	1.07908		21.1624	1.07767		21.1624	1.08952		21.1624	1.08754		21.1624	1.09749		21.1624	1.10107		21.1624	1.10088		21.1624	1.09238		21.1624	1.08403		21.1624	1.08848		21.1624	1.08107		21.1624	1.08458		21.1624	1.07172		21.1624	1.06442		21.1624	1.04679
21.2369	1.08965		21.2369	1.08656		21.2369	1.08515		21.2369	1.09781		21.2369	1.09418		21.2369	1.10512		21.2369	1.10933		21.2369	1.10806		21.2369	1.09924		21.2369	1.09261		21.2369	1.09672		21.2369	1.08835		21.2369	1.09279		21.2369	1.08039		21.2369	1.07147		21.2369	1.05367
21.3115	1.095		21.3115	1.0918		21.3115	1.09085		21.3115	1.10323		21.3115	1.10091		21.3115	1.11012		21.3115	1.11527		21.3115	1.11274		21.3115	1.10661		21.3115	1.09793		21.3115	1.10248		21.3115	1.09393		21.3115	1.0987		21.3115	1.08653		21.3115	1.0772		21.3115	1.06048
21.386	1.09952		21.386	1.09535		21.386	1.09442		21.386	1.10789		21.386	1.10471		21.386	1.1137		21.386	1.1199		21.386	1.11749		21.386	1.11059		21.386	1.10216		21.386	1.10701		21.386	1.09999		21.386	1.10489		21.386	1.08985		21.386	1.08373		21.386	1.06409
21.4605	1.10304		21.4605	1.10017		21.4605	1.09866		21.4605	1.1118		21.4605	1.10902		21.4605	1.11837		21.4605	1.12416		21.4605	1.12306		21.4605	1.11462		21.4605	1.10752		21.4605	1.11151		21.4605	1.10267		21.4605	1.10856		21.4605	1.0957		21.4605	1.08707		21.4605	1.06936
21.535	1.10688		21.535	1.10458		21.535	1.10208		21.535	1.11508		21.535	1.11258		21.535	1.12177		21.535	1.12769		21.535	1.12599		21.535	1.11856		21.535	1.11188		21.535	1.11468		21.535	1.1069		21.535	1.11245		21.535	1.09932		21.535	1.08963		21.535	1.07159
21.6095	1.11038		21.6095	1.10693		21.6095	1.1065		21.6095	1.11924		21.6095	1.1164		21.6095	1.12594		21.6095	1.1306		21.6095	1.12942		21.6095	1.12137		21.6095	1.11421		21.6095	1.11844		21.6095	1.11039		21.6095	1.11621		21.6095	1.10341		21.6095	1.0949		21.6095	1.07608
21.684	1.11457		21.684	1.11133		21.684	1.11033		21.684	1.12236		21.684	1.11929		21.684	1.12943		21.684	1.13388		21.684	1.1328		21.684	1.12547		21.684	1.11846		21.684	1.12176		21.684	1.11352		21.684	1.12017		21.684	1.10556		21.684	1.09778		21.684	1.08064
21.7586	1.11519		21.7586	1.11339		21.7586	1.11171		21.7586	1.12528		21.7586	1.12178		21.7586	1.1318		21.7586	1.13753		21.7586	1.1358		21.7586	1.12697		21.7586	1.12196		21.7586	1.12529		21.7586	1.11607		21.7586	1.12363		21.7586	1.10874		21.7586	1.10177		21.7586	1.08278
