# Supplementary material for: Structure–function analysis of Lactiplantibacillus plantarum DltE reveals D-alanylated lipoteichoic acids as direct cues supporting Drosophila juvenile growth
Source: eLife. 2023 Apr 12;12:e84669. doi: 10.7554/eLife.84669 (PMC10241514; doi:10.7554/eLife.84669)
Supplement: Figure 3—figure supplement 4—source data 1. [file elife-84669-fig3-figsupp4-data1.xlsx]

## Sheet: Figure 3 - Fig supplement 4
	D-Ala	Gro-D-Ala
Control	1	1
DltE	1.78992	0.410947
DltE(S128A)	1.03069	0.832082
