# Supplementary material for: Structure–function analysis of Lactiplantibacillus plantarum DltE reveals D-alanylated lipoteichoic acids as direct cues supporting Drosophila juvenile growth
Source: eLife. 2023 Apr 12;12:e84669. doi: 10.7554/eLife.84669 (PMC10241514; doi:10.7554/eLife.84669)
Supplement: Figure 3—source data 1. [file elife-84669-fig3-data1.xlsx]

## Sheet: Figure 3c
Figure 3c
NanoTemper Technologies	NanoTemper Technologies
MO.Affinity Analysis v2.3	MO.Affinity Analysis v2.3
Origin of exported data	Origin of exported data
Project Title:
Comment:
Project File Path:
Analysis-Set Name:	Analysis-Set #1
Exported from:	MST Traces
Exported on:	2022-07-04 16:11:56
Analysis Settings	Analysis Settings
Type of Analysis:	MST
Evaluation strategy:	Manual
Cold Region Start:	-1
Cold Region End:	0
Hot Region Start:	9
Hot Region End:	10
Sample Information	Sample Information		Sample Information	Sample Information		Sample Information	Sample Information		Sample Information	Sample Information		Sample Information	Sample Information		Sample Information	Sample Information		Sample Information	Sample Information		Sample Information	Sample Information
Merge-Set Name:	PERFECT (#06)		Merge-Set Name:	PERFECT (#06)		Merge-Set Name:	PERFECT (#06)		Merge-Set Name:	PERFECT (#06)		Merge-Set Name:	PERFECT (#06)		Merge-Set Name:	PERFECT (#06)		Merge-Set Name:	PERFECT (#06)		Merge-Set Name:	PERFECT (#06)
Run Name:	PERFECT (#06)		Run Name:	PERFECT (#06)		Run Name:	PERFECT (#06)		Run Name:	PERFECT (#06)		Run Name:	PERFECT (#06)		Run Name:	PERFECT (#06)		Run Name:	PERFECT (#06)		Run Name:	PERFECT (#06)
Date of Measurement:	2022-03-25 23:16:06		Date of Measurement:	2022-03-25 23:16:46		Date of Measurement:	2022-03-25 23:17:27		Date of Measurement:	2022-03-25 23:18:07		Date of Measurement:	2022-03-25 23:18:48		Date of Measurement:	2022-03-25 23:19:28		Date of Measurement:	2022-03-25 23:20:09		Date of Measurement:	2022-03-25 23:20:49
Capillary Type:	Monolith NT.115 Premium Capillary		Capillary Type:	Monolith NT.115 Premium Capillary		Capillary Type:	Monolith NT.115 Premium Capillary		Capillary Type:	Monolith NT.115 Premium Capillary		Capillary Type:	Monolith NT.115 Premium Capillary		Capillary Type:	Monolith NT.115 Premium Capillary		Capillary Type:	Monolith NT.115 Premium Capillary		Capillary Type:	Monolith NT.115 Premium Capillary
Capillary Position:	1		Capillary Position:	2		Capillary Position:	3		Capillary Position:	4		Capillary Position:	5		Capillary Position:	6		Capillary Position:	7		Capillary Position:	8
Ligand:	LTA NC8		Ligand:	LTA NC8		Ligand:	LTA NC8		Ligand:	LTA NC8		Ligand:	LTA NC8		Ligand:	LTA NC8		Ligand:	LTA NC8		Ligand:	LTA NC8
Ligand Concentration:	0		Ligand Concentration:	0		Ligand Concentration:	0		Ligand Concentration:	0		Ligand Concentration:	0.0005		Ligand Concentration:	0.0005		Ligand Concentration:	0.0005		Ligand Concentration:	0.0005
Target:	DltE		Target:	DltE		Target:	DltE		Target:	DltE		Target:	DltE		Target:	DltE		Target:	DltE		Target:	DltE
TargetConcentration:	2e-08		TargetConcentration:	2e-08		TargetConcentration:	2e-08		TargetConcentration:	2e-08		TargetConcentration:	2e-08		TargetConcentration:	2e-08		TargetConcentration:	2e-08		TargetConcentration:	2e-08
Measurement Settings	Measurement Settings		Measurement Settings	Measurement Settings		Measurement Settings	Measurement Settings		Measurement Settings	Measurement Settings		Measurement Settings	Measurement Settings		Measurement Settings	Measurement Settings		Measurement Settings	Measurement Settings		Measurement Settings	Measurement Settings
MST-Power:	Medium		MST-Power:	Medium		MST-Power:	Medium		MST-Power:	Medium		MST-Power:	Medium		MST-Power:	Medium		MST-Power:	Medium		MST-Power:	Medium
Excitation-Power:	5		Excitation-Power:	5		Excitation-Power:	5		Excitation-Power:	5		Excitation-Power:	5		Excitation-Power:	5		Excitation-Power:	5		Excitation-Power:	5
Excitation type:	Nano - RED		Excitation type:	Nano - RED		Excitation type:	Nano - RED		Excitation type:	Nano - RED		Excitation type:	Nano - RED		Excitation type:	Nano - RED		Excitation type:	Nano - RED		Excitation type:	Nano - RED
Thermostat Setpoint:	22		Thermostat Setpoint:	22		Thermostat Setpoint:	22		Thermostat Setpoint:	22		Thermostat Setpoint:	22		Thermostat Setpoint:	22		Thermostat Setpoint:	22		Thermostat Setpoint:	22
Included	Included		Included	Included		Included	Included		Included	Included		Included	Included		Included	Included		Included	Included		Included	Included
Time [s]	Normalized Fluorescence [-]		Time [s]	Normalized Fluorescence [-]		Time [s]	Normalized Fluorescence [-]		Time [s]	Normalized Fluorescence [-]		Time [s]	Normalized Fluorescence [-]		Time [s]	Normalized Fluorescence [-]		Time [s]	Normalized Fluorescence [-]		Time [s]	Normalized Fluorescence [-]
-3.57675	0.999267		-3.57675	0.998059		-3.57675	1.00077		-3.57675	0.999394		-3.57675	1.00002		-3.57675	0.999898		-3.57675	0.997285		-3.57675	0.997017
-3.50223	0.998684		-3.50223	1.00111		-3.50223	1.00062		-3.50223	0.99704		-3.50223	1.00007		-3.50223	0.99942		-3.50223	0.998177		-3.50223	0.996976
-3.42772	0.999227		-3.42772	1.00001		-3.42772	1.00145		-3.42772	0.999726		-3.42772	0.999667		-3.42772	0.99888		-3.42772	0.998791		-3.42772	0.998156
-3.3532	1.00045		-3.3532	1.00007		-3.3532	1.00157		-3.3532	0.998608		-3.3532	1.00039		-3.3532	0.998791		-3.3532	0.998346		-3.3532	0.997935
-3.27869	0.999344		-3.27869	0.999511		-3.27869	1.00048		-3.27869	0.998726		-3.27869	0.998796		-3.27869	0.999349		-3.27869	0.999295		-3.27869	0.998395
-3.20417	0.998056		-3.20417	1.00082		-3.20417	0.999596		-3.20417	1.00077		-3.20417	0.999727		-3.20417	0.998615		-3.20417	0.998639		-3.20417	1.00062
-3.12966	1.00124		-3.12966	1.00148		-3.12966	1.00019		-3.12966	1.00082		-3.12966	0.99932		-3.12966	0.999672		-3.12966	0.998797		-3.12966	0.999148
-3.05514	1.00253		-3.05514	0.999144		-3.05514	1.00029		-3.05514	0.999785		-3.05514	1.00018		-3.05514	1.00076		-3.05514	0.999943		-3.05514	1.00045
-2.98062	1.0005		-2.98062	0.997682		-2.98062	1.00065		-2.98062	1.00152		-2.98062	0.999362		-2.98062	1.00081		-2.98062	0.998892		-2.98062	1.00094
-2.90611	0.999778		-2.90611	0.99721		-2.90611	1.00069		-2.90611	1.0017		-2.90611	0.999869		-2.90611	1.00129		-2.90611	0.999023		-2.90611	1.00043
-2.83159	1.00171		-2.83159	0.99898		-2.83159	1.00074		-2.83159	0.998081		-2.83159	0.999024		-2.83159	1.00066		-2.83159	0.999509		-2.83159	0.999146
-2.75708	0.999924		-2.75708	0.998436		-2.75708	0.999448		-2.75708	0.999081		-2.75708	0.998552		-2.75708	1.0019		-2.75708	0.9999		-2.75708	1.00044
-2.68256	1.00156		-2.68256	0.998091		-2.68256	1.00033		-2.68256	0.998076		-2.68256	1.00023		-2.68256	1.00046		-2.68256	1.00034		-2.68256	1.00028
-2.60805	0.999875		-2.60805	0.999076		-2.60805	1.00204		-2.60805	1.0001		-2.60805	0.999414		-2.60805	1.00062		-2.60805	1.00003		-2.60805	1.00057
-2.53353	0.999081		-2.53353	1.00096		-2.53353	1.0022		-2.53353	1.00003		-2.53353	0.999587		-2.53353	1.00052		-2.53353	0.99952		-2.53353	1.0003
-2.45901	0.999462		-2.45901	1.00172		-2.45901	1.00153		-2.45901	1.00086		-2.45901	0.999457		-2.45901	1.00145		-2.45901	1.00129		-2.45901	1.00021
-2.3845	0.998319		-2.3845	1.00047		-2.3845	1.00188		-2.3845	1.00068		-2.3845	0.999001		-2.3845	1.00088		-2.3845	0.999549		-2.3845	1.00034
-2.30998	0.999304		-2.30998	0.998935		-2.30998	1.00245		-2.30998	1.00034		-2.30998	0.999776		-2.30998	1.00036		-2.30998	1.00159		-2.30998	0.998752
-2.23547	1.00027		-2.23547	0.999185		-2.23547	0.999471		-2.23547	0.999512		-2.23547	0.999392		-2.23547	0.996841		-2.23547	1.00077		-2.23547	1.00128
-2.16095	1.00023		-2.16095	0.999816		-2.16095	1.00095		-2.16095	0.999108		-2.16095	0.998562		-2.16095	0.997889		-2.16095	1.00012		-2.16095	1.00067
-2.08644	0.998639		-2.08644	0.999294		-2.08644	1.00112		-2.08644	0.999944		-2.08644	0.998314		-2.08644	0.998185		-2.08644	1.00102		-2.08644	0.999898
-2.01192	1.00011		-2.01192	1.00157		-2.01192	1.00049		-2.01192	0.999413		-2.01192	0.998567		-2.01192	1		-2.01192	0.999251		-2.01192	1.00175
-1.93741	1.00057		-1.93741	1.00101		-1.93741	1.00037		-1.93741	1.00094		-1.93741	0.999305		-1.93741	0.999584		-1.93741	0.999696		-1.93741	1.00051
-1.86289	0.999575		-1.86289	1.00214		-1.86289	0.999207		-1.86289	0.999431		-1.86289	0.998567		-1.86289	1.0003		-1.86289	1.00074		-1.86289	0.997709
-1.78837	0.999657		-1.78837	1.00002		-1.78837	1.00074		-1.78837	0.999335		-1.78837	0.997991		-1.78837	1.0016		-1.78837	0.999998		-1.78837	0.997793
-1.71386	0.997367		-1.71386	1.00264		-1.71386	1.00092		-1.71386	0.99994		-1.71386	0.996993		-1.71386	0.999826		-1.71386	0.999637		-1.71386	0.998799
-1.63934	0.999697		-1.63934	1.00138		-1.63934	0.998841		-1.63934	1.00053		-1.63934	0.998304		-1.63934	1.00043		-1.63934	0.999598		-1.63934	0.998226
-1.56483	0.998643		-1.56483	1.00102		-1.56483	1.00067		-1.56483	1.00079		-1.56483	0.998437		-1.56483	1.00123		-1.56483	0.998177		-1.56483	0.997608
-1.49031	1.00098		-1.49031	0.999788		-1.49031	1.00121		-1.49031	0.999981		-1.49031	0.997905		-1.49031	0.999863		-1.49031	1.00028		-1.49031	0.998299
-1.4158	0.999871		-1.4158	0.999856		-1.4158	0.999975		-1.4158	0.999258		-1.4158	1.00018		-1.4158	0.999836		-1.4158	0.997457		-1.4158	0.998876
-1.34128	1.0007		-1.34128	0.997723		-1.34128	1.00106		-1.34128	0.99964		-1.34128	1.00051		-1.34128	0.998902		-1.34128	0.998041		-1.34128	0.998084
-1.26677	1.00085		-1.26677	1.00148		-1.26677	0.999484		-1.26677	0.998526		-1.26677	1.00003		-1.26677	0.999732		-1.26677	0.997474		-1.26677	0.997754
-1.19225	1.00031		-1.19225	1.00138		-1.19225	1.00036		-1.19225	0.998381		-1.19225	0.998525		-1.19225	0.999975		-1.19225	0.998032		-1.19225	0.997264
-1.11773	0.997918		-1.11773	1.0006		-1.11773	1.00123		-1.11773	0.998199		-1.11773	0.999447		-1.11773	1.00091		-1.11773	0.997653		-1.11773	0.996775
-1.04322	0.997419		-1.04322	1.00095		-1.04322	1.00195		-1.04322	0.997167		-1.04322	0.997874		-1.04322	1.00045		-1.04322	0.998128		-1.04322	0.9973
-0.968703	0.998262		-0.968703	0.999144		-0.968703	1.00477		-0.968703	0.999931		-0.968703	0.9969		-0.968703	0.999933		-0.968703	0.997362		-0.968703	0.997325
-0.894187	0.999292		-0.894187	1.00088		-0.894187	1.0032		-0.894187	0.999112		-0.894187	0.997876		-0.894187	1.00123		-0.894187	0.998266		-0.894187	0.997143
-0.819672	0.99919		-0.819672	0.999039		-0.819672	1.00298		-0.819672	0.996894		-0.819672	0.997598		-0.819672	0.999937		-0.819672	0.998127		-0.819672	0.997937
-0.745156	0.997942		-0.745156	0.998903		-0.745156	1.00339		-0.745156	0.998317		-0.745156	0.998375		-0.745156	1.00132		-0.745156	0.997455		-0.745156	0.996964
-0.67064	0.999579		-0.67064	0.999498		-0.67064	1.00205		-0.67064	0.997135		-0.67064	0.998456		-0.67064	0.999722		-0.67064	0.998371		-0.67064	0.99855
-0.596125	0.999474		-0.596125	0.999534		-0.596125	1.00344		-0.596125	0.999185		-0.596125	0.997774		-0.596125	1.00033		-0.596125	0.997614		-0.596125	0.997691
-0.521609	0.999811		-0.521609	0.998077		-0.521609	1.00322		-0.521609	0.999408		-0.521609	0.997741		-0.521609	1.00016		-0.521609	0.997699		-0.521609	0.997297
-0.447094	0.999815		-0.447094	0.999144		-0.447094	1.00372		-0.447094	1.00031		-0.447094	0.997887		-0.447094	1.00193		-0.447094	0.997778		-0.447094	0.998739
-0.372578	0.999199		-0.372578	0.999071		-0.372578	1.00339		-0.372578	0.999744		-0.372578	0.998079		-0.372578	1.00164		-0.372578	0.995457		-0.372578	0.998038
-0.298063	1.00032		-0.298063	0.999906		-0.298063	1.00318		-0.298063	0.99919		-0.298063	0.997879		-0.298063	1.00088		-0.298063	0.997267		-0.298063	0.996578
-0.223547	1.0005		-0.223547	0.99844		-0.223547	1.00249		-0.223547	0.998003		-0.223547	0.998415		-0.223547	1.00015		-0.223547	0.99834		-0.223547	0.997392
-0.149031	1.00059		-0.149031	0.999924		-0.149031	1.00475		-0.149031	0.997594		-0.149031	0.996176		-0.149031	0.999879		-0.149031	0.99715		-0.149031	0.996575
-0.0745156	0.999186		-0.0745156	0.998608		-0.0745156	1.00208		-0.0745156	0.999031		-0.0745156	0.997269		-0.0745156	0.997204		-0.0745156	0.997102		-0.0745156	0.997847
0	0.997946		0	0.996901		0	1.00245		0	0.997926		0	0.996734		0	0.996409		0	0.996128		0	0.995759
0.0745156	0.975489		0.0745156	0.974143		0.0745156	0.97874		0.0745156	0.977454		0.0745156	0.978024		0.0745156	0.978221		0.0745156	0.979081		0.0745156	0.978462
0.149031	0.964243		0.149031	0.963775		0.149031	0.965391		0.149031	0.963732		0.149031	0.968603		0.149031	0.96861		0.149031	0.968941		0.149031	0.968851
0.223547	0.957479		0.223547	0.956885		0.223547	0.95771		0.223547	0.958309		0.223547	0.963286		0.223547	0.96389		0.223547	0.965685		0.223547	0.962819
0.298062	0.951687		0.298062	0.951692		0.298062	0.95269		0.298062	0.953723		0.298062	0.958678		0.298062	0.96062		0.298062	0.960248		0.298062	0.958518
0.372578	0.94759		0.372578	0.94704		0.372578	0.948112		0.372578	0.946741		0.372578	0.954368		0.372578	0.956537		0.372578	0.957774		0.372578	0.954301
0.447093	0.9432		0.447093	0.945447		0.447093	0.943548		0.447093	0.945536		0.447093	0.952723		0.447093	0.953354		0.447093	0.953255		0.447093	0.953108
0.521609	0.939881		0.521609	0.943114		0.521609	0.941462		0.521609	0.943282		0.521609	0.950449		0.521609	0.951671		0.521609	0.950564		0.521609	0.948104
0.596125	0.937186		0.596125	0.93921		0.596125	0.940091		0.596125	0.938309		0.596125	0.946612		0.596125	0.948287		0.596125	0.949051		0.596125	0.945285
0.67064	0.932635		0.67064	0.936405		0.67064	0.935996		0.67064	0.936696		0.67064	0.944282		0.67064	0.946339		0.67064	0.945264		0.67064	0.942813
0.745156	0.931889		0.745156	0.932392		0.745156	0.932548		0.745156	0.933669		0.745156	0.941621		0.745156	0.9434		0.745156	0.942626		0.745156	0.941188
0.819672	0.928963		0.819672	0.931026		0.819672	0.930887		0.819672	0.929773		0.819672	0.939222		0.819672	0.94254		0.819672	0.941282		0.819672	0.938323
0.894187	0.926641		0.894187	0.927404		0.894187	0.928583		0.894187	0.928778		0.894187	0.938141		0.894187	0.939421		0.894187	0.937456		0.894187	0.936437
0.968703	0.924018		0.968703	0.926251		0.968703	0.927515		0.968703	0.925164		0.968703	0.935615		0.968703	0.93636		0.968703	0.934407		0.968703	0.934404
1.04322	0.921907		1.04322	0.922733		1.04322	0.926359		1.04322	0.925537		1.04322	0.934441		1.04322	0.935499		1.04322	0.933239		1.04322	0.932513
1.11773	0.920837		1.11773	0.922438		1.11773	0.923925		1.11773	0.922023		1.11773	0.931544		1.11773	0.933628		1.11773	0.931436		1.11773	0.930529
1.19225	0.917193		1.19225	0.918507		1.19225	0.921517		1.19225	0.923287		1.19225	0.931747		1.19225	0.931931		1.19225	0.929933		1.19225	0.927301
1.26677	0.916922		1.26677	0.916791		1.26677	0.921058		1.26677	0.920946		1.26677	0.93079		1.26677	0.929849		1.26677	0.929126		1.26677	0.927017
1.34128	0.914279		1.34128	0.918158		1.34128	0.919544		1.34128	0.918624		1.34128	0.927844		1.34128	0.9294		1.34128	0.927465		1.34128	0.926367
1.4158	0.913465		1.4158	0.914812		1.4158	0.916493		1.4158	0.915705		1.4158	0.925906		1.4158	0.928146		1.4158	0.925976		1.4158	0.92326
1.49031	0.913505		1.49031	0.913383		1.49031	0.917659		1.49031	0.91666		1.49031	0.926818		1.49031	0.925948		1.49031	0.925483		1.49031	0.923393
1.56483	0.909623		1.56483	0.911998		1.56483	0.915395		1.56483	0.913274		1.56483	0.925692		1.56483	0.924598		1.56483	0.923229		1.56483	0.920592
1.63934	0.909205		1.63934	0.910246		1.63934	0.912764		1.63934	0.913037		1.63934	0.923631		1.63934	0.923312		1.63934	0.921212		1.63934	0.921558
1.71386	0.909663		1.71386	0.909624		1.71386	0.912112		1.71386	0.911669		1.71386	0.921184		1.71386	0.921772		1.71386	0.919512		1.71386	0.92039
1.78837	0.90649		1.78837	0.908825		1.78837	0.912322		1.78837	0.908833		1.78837	0.919687		1.78837	0.918731		1.78837	0.919066		1.78837	0.918419
1.86289	0.906964		1.86289	0.909511		1.86289	0.90937		1.86289	0.907569		1.86289	0.919396		1.86289	0.918239		1.86289	0.917675		1.86289	0.916674
1.93741	0.90403		1.93741	0.907722		1.93741	0.909111		1.93741	0.908001		1.93741	0.917367		1.93741	0.91846		1.93741	0.917009		1.93741	0.916656
2.01192	0.902429		2.01192	0.906188		2.01192	0.908289		2.01192	0.905956		2.01192	0.914721		2.01192	0.915644		2.01192	0.915202		2.01192	0.913999
2.08644	0.901995		2.08644	0.907237		2.08644	0.906168		2.08644	0.906019		2.08644	0.91429		2.08644	0.9168		2.08644	0.914192		2.08644	0.913181
2.16095	0.901922		2.16095	0.904849		2.16095	0.905815		2.16095	0.903983		2.16095	0.912306		2.16095	0.913928		2.16095	0.913575		2.16095	0.911566
2.23547	0.900374		2.23547	0.904808		2.23547	0.903962		2.23547	0.902565		2.23547	0.911907		2.23547	0.913395		2.23547	0.912071		2.23547	0.912101
2.30998	0.898599		2.30998	0.902185		2.30998	0.901849		2.30998	0.901328		2.30998	0.910205		2.30998	0.91313		2.30998	0.910635		2.30998	0.911094
2.3845	0.898765		2.3845	0.900918		2.3845	0.901474		2.3845	0.901097		2.3845	0.908795		2.3845	0.909572		2.3845	0.910362		2.3845	0.909681
2.45901	0.897168		2.45901	0.899184		2.45901	0.901568		2.45901	0.901188		2.45901	0.90822		2.45901	0.910168		2.45901	0.907795		2.45901	0.907855
2.53353	0.898907		2.53353	0.899893		2.53353	0.900474		2.53353	0.900042		2.53353	0.906044		2.53353	0.910114		2.53353	0.908499		2.53353	0.908259
2.60805	0.895993		2.60805	0.900505		2.60805	0.900791		2.60805	0.901488		2.60805	0.906745		2.60805	0.908016		2.60805	0.907632		2.60805	0.906015
2.68256	0.897367		2.68256	0.899262		2.68256	0.899049		2.68256	0.902106		2.68256	0.9067		2.68256	0.907444		2.68256	0.905855		2.68256	0.904585
2.75708	0.897071		2.75708	0.900896		2.75708	0.898223		2.75708	0.897965		2.75708	0.905467		2.75708	0.904353		2.75708	0.905356		2.75708	0.9049
2.83159	0.896897		2.83159	0.898799		2.83159	0.900063		2.83159	0.896501		2.83159	0.905997		2.83159	0.903256		2.83159	0.905046		2.83159	0.904125
2.90611	0.897152		2.90611	0.899026		2.90611	0.897705		2.90611	0.896106		2.90611	0.905118		2.90611	0.901489		2.90611	0.902739		2.90611	0.902561
2.98062	0.894806		2.98062	0.898204		2.98062	0.898245		2.98062	0.896174		2.98062	0.904413		2.98062	0.903804		2.98062	0.901501		2.98062	0.90151
3.05514	0.895746		3.05514	0.898526		3.05514	0.897388		3.05514	0.898556		3.05514	0.901629		3.05514	0.901505		3.05514	0.900068		3.05514	0.900952
3.12966	0.895782		3.12966	0.89686		3.12966	0.897468		3.12966	0.897492		3.12966	0.901259		3.12966	0.899457		3.12966	0.900725		3.12966	0.900209
3.20417	0.894862		3.20417	0.898268		3.20417	0.895847		3.20417	0.895106		3.20417	0.899776		3.20417	0.897686		3.20417	0.898897		3.20417	0.89967
3.27869	0.895191		3.27869	0.896593		3.27869	0.897709		3.27869	0.896429		3.27869	0.897817		3.27869	0.898295		3.27869	0.899235		3.27869	0.897593
3.3532	0.895981		3.3532	0.897391		3.3532	0.895713		3.3532	0.89362		3.3532	0.897272		3.3532	0.898892		3.3532	0.897267		3.3532	0.897125
3.42772	0.893201		3.42772	0.89879		3.42772	0.896012		3.42772	0.893606		3.42772	0.896828		3.42772	0.898223		3.42772	0.897943		3.42772	0.896638
3.50223	0.893375		3.50223	0.896443		3.50223	0.895856		3.50223	0.893792		3.50223	0.896485		3.50223	0.897851		3.50223	0.896816		3.50223	0.896327
3.57675	0.893877		3.57675	0.896919		3.57675	0.896575		3.57675	0.892392		3.57675	0.896062		3.57675	0.896715		3.57675	0.896041		3.57675	0.894594
3.65126	0.893055		3.65126	0.896093		3.65126	0.894431		3.65126	0.893938		3.65126	0.895499		3.65126	0.896015		3.65126	0.894332		3.65126	0.893362
3.72578	0.891875		3.72578	0.895875		3.72578	0.89532		3.72578	0.892924		3.72578	0.894433		3.72578	0.895096		3.72578	0.893441		3.72578	0.890638
3.8003	0.893594		3.8003	0.896093		3.8003	0.894342		3.8003	0.891856		3.8003	0.894945		3.8003	0.89432		3.8003	0.893472		3.8003	0.892023
3.87481	0.894595		3.87481	0.895254		3.87481	0.896213		3.87481	0.895651		3.87481	0.893039		3.87481	0.89314		3.87481	0.892142		3.87481	0.890394
3.94933	0.895154		3.94933	0.897927		3.94933	0.894449		3.94933	0.895183		3.94933	0.890482		3.94933	0.892425		3.94933	0.89205		3.94933	0.889676
4.02384	0.893517		4.02384	0.897618		4.02384	0.894079		4.02384	0.895588		4.02384	0.891864		4.02384	0.89037		4.02384	0.890418		4.02384	0.887612
4.09836	0.891701		4.09836	0.89672		4.09836	0.895552		4.09836	0.895088		4.09836	0.889812		4.09836	0.890308		4.09836	0.891044		4.09836	0.88796
4.17287	0.89143		4.17287	0.89632		4.17287	0.894784		4.17287	0.89472		4.17287	0.889778		4.17287	0.888937		4.17287	0.888265		4.17287	0.886193
4.24739	0.891219		4.24739	0.896992		4.24739	0.895713		4.24739	0.894806		4.24739	0.889318		4.24739	0.888146		4.24739	0.887572		4.24739	0.885985
4.3219	0.892593		4.3219	0.89583		4.3219	0.896888		4.3219	0.894947		4.3219	0.888898		4.3219	0.887385		4.3219	0.887577		4.3219	0.887216
4.39642	0.892463		4.39642	0.897296		4.39642	0.895901		4.39642	0.894897		4.39642	0.887409		4.39642	0.887134		4.39642	0.886056		4.39642	0.885995
4.47094	0.891199		4.47094	0.896338		4.47094	0.895298		4.47094	0.895397		4.47094	0.886016		4.47094	0.887453		4.47094	0.88445		4.47094	0.886327
4.54545	0.893156		4.54545	0.896615		4.54545	0.896097		4.54545	0.896097		4.54545	0.885912		4.54545	0.886459		4.54545	0.886211		4.54545	0.885248
4.61997	0.892017		4.61997	0.897764		4.61997	0.897857		4.61997	0.895842		4.61997	0.883782		4.61997	0.885774		4.61997	0.883266		4.61997	0.883719
4.69448	0.891417		4.69448	0.897655		4.69448	0.897763		4.69448	0.897124		4.69448	0.884455		4.69448	0.884277		4.69448	0.882781		4.69448	0.883427
4.769	0.8916		4.769	0.897941		4.769	0.899058		4.769	0.897156		4.769	0.883135		4.769	0.885036		4.769	0.882952		4.769	0.88376
4.84351	0.891705		4.84351	0.898072		4.84351	0.89929		4.84351	0.897347		4.84351	0.884115		4.84351	0.884496		4.84351	0.881059		4.84351	0.883565
4.91803	0.893428		4.91803	0.897886		4.91803	0.89842		4.91803	0.89756		4.91803	0.8829		4.91803	0.883337		4.91803	0.881434		4.91803	0.882789
4.99255	0.895178		4.99255	0.898336		4.99255	0.900921		4.99255	0.896215		4.99255	0.880418		4.99255	0.883395		4.99255	0.879651		4.99255	0.882433
5.06706	0.894489		5.06706	0.899243		5.06706	0.901041		5.06706	0.898288		5.06706	0.879562		5.06706	0.88178		5.06706	0.879488		5.06706	0.881274
5.14158	0.894258		5.14158	0.900533		5.14158	0.900085		5.14158	0.900206		5.14158	0.879718		5.14158	0.881578		5.14158	0.880687		5.14158	0.882079
5.21609	0.898125		5.21609	0.900451		5.21609	0.902993		5.21609	0.897788		5.21609	0.880285		5.21609	0.880501		5.21609	0.87974		5.21609	0.879778
5.29061	0.894672		5.29061	0.900165		5.29061	0.903832		5.29061	0.899428		5.29061	0.879709		5.29061	0.880577		5.29061	0.87824		5.29061	0.879839
5.36512	0.896552		5.36512	0.901118		5.36512	0.905016		5.36512	0.899047		5.36512	0.879755		5.36512	0.880426		5.36512	0.878259		5.36512	0.878276
5.43964	0.897286		5.43964	0.901268		5.43964	0.905096		5.43964	0.902333		5.43964	0.877935		5.43964	0.878668		5.43964	0.876771		5.43964	0.877957
5.51415	0.897472		5.51415	0.901377		5.51415	0.906329		5.51415	0.902242		5.51415	0.879244		5.51415	0.877978		5.51415	0.876006		5.51415	0.878149
5.58867	0.898818		5.58867	0.900723		5.58867	0.90745		5.58867	0.902397		5.58867	0.877899		5.58867	0.878794		5.58867	0.876895		5.58867	0.878331
5.66319	0.898615		5.66319	0.901531		5.66319	0.906387		5.66319	0.903365		5.66319	0.877241		5.66319	0.877611		5.66319	0.875357		5.66319	0.87676
5.7377	0.900423		5.7377	0.904545		5.7377	0.90557		5.7377	0.902438		5.7377	0.875093		5.7377	0.877921		5.7377	0.874848		5.7377	0.87605
5.81222	0.899337		5.81222	0.903955		5.81222	0.905538		5.81222	0.904142		5.81222	0.875386		5.81222	0.87576		5.81222	0.872502		5.81222	0.875951
5.88673	0.900281		5.88673	0.904377		5.88673	0.90895		5.88673	0.90596		5.88673	0.874669		5.88673	0.875623		5.88673	0.875021		5.88673	0.875639
5.96125	0.902636		5.96125	0.906061		5.96125	0.910268		5.96125	0.905642		5.96125	0.873558		5.96125	0.876033		5.96125	0.873983		5.96125	0.874563
6.03576	0.903483		6.03576	0.905585		6.03576	0.911152		6.03576	0.905392		6.03576	0.873944		6.03576	0.87516		6.03576	0.872973		6.03576	0.874444
6.11028	0.904374		6.11028	0.907859		6.11028	0.911206		6.11028	0.905897		6.11028	0.873771		6.11028	0.874683		6.11028	0.87312		6.11028	0.873713
6.18479	0.904261		6.18479	0.910814		6.18479	0.910996		6.18479	0.906719		6.18479	0.872281		6.18479	0.873837		6.18479	0.872641		6.18479	0.872838
6.25931	0.904662		6.25931	0.908594		6.25931	0.912094		6.25931	0.90796		6.25931	0.872317		6.25931	0.873763		6.25931	0.870451		6.25931	0.871182
6.33383	0.905756		6.33383	0.909529		6.33383	0.911255		6.33383	0.908151		6.33383	0.872724		6.33383	0.873264		6.33383	0.871087		6.33383	0.871264
6.40834	0.907892		6.40834	0.910228		6.40834	0.91255		6.40834	0.911605		6.40834	0.871426		6.40834	0.873156		6.40834	0.868252		6.40834	0.872014
6.48286	0.907459		6.48286	0.912566		6.48286	0.912148		6.48286	0.910878		6.48286	0.870478		6.48286	0.872696		6.48286	0.868787		6.48286	0.87133
6.55737	0.908237		6.55737	0.91316		6.55737	0.915345		6.55737	0.910001		6.55737	0.871286		6.55737	0.872298		6.55737	0.869538		6.55737	0.870297
6.63189	0.909582		6.63189	0.913995		6.63189	0.916288		6.63189	0.910192		6.63189	0.870213		6.63189	0.871591		6.63189	0.868865		6.63189	0.869967
6.7064	0.91113		6.7064	0.915675		6.7064	0.91769		6.7064	0.91231		6.7064	0.869585		6.7064	0.871089		6.7064	0.867907		6.7064	0.868184
6.78092	0.911909		6.78092	0.915679		6.78092	0.918516		6.78092	0.914778		6.78092	0.868961		6.78092	0.870575		6.78092	0.867236		6.78092	0.868546
6.85544	0.911945		6.85544	0.915076		6.85544	0.918454		6.85544	0.915964		6.85544	0.869237		6.85544	0.869731		6.85544	0.867356		6.85544	0.868609
6.92995	0.913055		6.92995	0.918802		6.92995	0.921531		6.92995	0.914896		6.92995	0.868803		6.92995	0.869563		6.92995	0.866509		6.92995	0.867317
7.00447	0.912638		7.00447	0.918235		7.00447	0.919856		7.00447	0.915424		7.00447	0.867331		7.00447	0.867597		7.00447	0.867041		7.00447	0.868282
7.07898	0.913805		7.07898	0.918289		7.07898	0.920714		7.07898	0.915269		7.07898	0.868022		7.07898	0.868379		7.07898	0.867384		7.07898	0.866108
7.1535	0.91451		7.1535	0.919978		7.1535	0.920682		7.1535	0.918242		7.1535	0.867494		7.1535	0.86826		7.1535	0.866509		7.1535	0.865813
7.22801	0.914924		7.22801	0.921839		7.22801	0.921321		7.22801	0.918955		7.22801	0.866353		7.22801	0.867642		7.22801	0.867037		7.22801	0.867915
7.30253	0.918028		7.30253	0.92345		7.30253	0.924452		7.30253	0.919787		7.30253	0.867765		7.30253	0.867739		7.30253	0.867277		7.30253	0.86741
7.37704	0.917931		7.37704	0.923046		7.37704	0.924711		7.37704	0.920873		7.37704	0.866189		7.37704	0.866966		7.37704	0.867664		7.37704	0.867413
7.45156	0.917177		7.45156	0.924127		7.45156	0.926033		7.45156	0.922678		7.45156	0.865925		7.45156	0.866235		7.45156	0.867876		7.45156	0.866646
7.52608	0.920359		7.52608	0.924413		7.52608	0.927502		7.52608	0.92261		7.52608	0.864339		7.52608	0.867046		7.52608	0.867259		7.52608	0.866451
7.60059	0.920261		7.60059	0.926469		7.60059	0.930083		7.60059	0.923428		7.60059	0.86427		7.60059	0.865821		7.60059	0.866378		7.60059	0.865688
7.67511	0.923358		7.67511	0.925724		7.67511	0.930744		7.67511	0.923983		7.67511	0.86485		7.67511	0.866733		7.67511	0.86496		7.67511	0.865681
7.74962	0.921919		7.74962	0.924998		7.74962	0.932455		7.74962	0.926142		7.74962	0.863484		7.74962	0.865327		7.74962	0.865419		7.74962	0.865477
7.82414	0.925729		7.82414	0.927649		7.82414	0.931861		7.82414	0.927023		7.82414	0.862096		7.82414	0.864856		7.82414	0.864878		7.82414	0.866089
7.89865	0.926235		7.89865	0.929796		7.89865	0.933473		7.89865	0.928437		7.89865	0.862576		7.89865	0.864929		7.89865	0.865082		7.89865	0.864349
7.97317	0.926345		7.97317	0.931807		7.97317	0.935505		7.97317	0.929914		7.97317	0.86279		7.97317	0.864452		7.97317	0.863461		7.97317	0.865359
8.04768	0.929299		8.04768	0.932093		8.04768	0.934638		8.04768	0.929601		8.04768	0.863883		8.04768	0.863721		8.04768	0.86379		8.04768	0.864003
8.1222	0.928817		8.1222	0.934063		8.1222	0.938881		8.1222	0.931214		8.1222	0.864912		8.1222	0.863847		8.1222	0.862372		8.1222	0.865008
8.19672	0.929105		8.19672	0.934249		8.19672	0.938158		8.19672	0.933955		8.19672	0.863799		8.19672	0.862534		8.19672	0.86239		8.19672	0.864627
8.27123	0.929109		8.27123	0.936182		8.27123	0.94161		8.27123	0.932828		8.27123	0.862723		8.27123	0.863357		8.27123	0.862113		8.27123	0.864503
8.34575	0.930965		8.34575	0.937276		8.34575	0.941565		8.34575	0.936082		8.34575	0.861853		8.34575	0.862183		8.34575	0.862508		8.34575	0.862369
8.42026	0.936068		8.42026	0.937685		8.42026	0.941864		8.42026	0.938209		8.42026	0.86191		8.42026	0.862208		8.42026	0.862144		8.42026	0.862476
8.49478	0.935913		8.49478	0.938402		8.49478	0.944508		8.49478	0.936664		8.49478	0.861459		8.49478	0.861959		8.49478	0.860882		8.49478	0.863601
8.56929	0.93608		8.56929	0.941761		8.56929	0.943914		8.56929	0.938764		8.56929	0.859982		8.56929	0.861522		8.56929	0.861179		8.56929	0.863931
8.64381	0.937336		8.64381	0.940317		8.64381	0.944254		8.64381	0.938978		8.64381	0.860751		8.64381	0.863591		8.64381	0.8604		8.64381	0.862361
8.71833	0.939277		8.71833	0.941053		8.71833	0.945535		8.71833	0.941732		8.71833	0.859675		8.71833	0.861659		8.71833	0.861942		8.71833	0.862476
8.79284	0.940015		8.79284	0.943867		8.79284	0.948554		8.79284	0.944791		8.79284	0.86063		8.79284	0.861218		8.79284	0.861116		8.79284	0.861464
8.86736	0.942864		8.86736	0.943894		8.86736	0.950671		8.86736	0.943209		8.86736	0.859567		8.86736	0.861486		8.86736	0.860616		8.86736	0.861192
8.94187	0.940205		8.94187	0.944916		8.94187	0.948465		8.94187	0.946036		8.94187	0.861386		8.94187	0.861862		8.94187	0.862742		8.94187	0.861051
9.01639	0.941146		9.01639	0.947072		9.01639	0.950903		9.01639	0.946891		9.01639	0.859554		9.01639	0.859846		9.01639	0.861809		9.01639	0.859656
9.0909	0.94519		9.0909	0.947117		9.0909	0.950551		9.0909	0.948636		9.0909	0.858733		9.0909	0.861134		9.0909	0.86116		9.0909	0.860909
9.16542	0.945032		9.16542	0.951248		9.16542	0.9539		9.16542	0.948691		9.16542	0.858828		9.16542	0.86014		9.16542	0.859719		9.16542	0.861087
9.23993	0.947347		9.23993	0.948215		9.23993	0.955852		9.23993	0.951832		9.23993	0.859228		9.23993	0.860657		9.23993	0.861221		9.23993	0.859707
9.31445	0.949742		9.31445	0.951947		9.31445	0.959715		9.31445	0.952882		9.31445	0.858212		9.31445	0.860871		9.31445	0.858507		9.31445	0.860656
9.38897	0.949559		9.38897	0.953358		9.38897	0.959782		9.38897	0.954027		9.38897	0.85821		9.38897	0.860042		9.38897	0.857896		9.38897	0.860606
9.46348	0.951124		9.46348	0.955128		9.46348	0.959456		9.46348	0.9557		9.46348	0.858842		9.46348	0.858889		9.46348	0.857803		9.46348	0.859632
9.538	0.953657		9.538	0.955183		9.538	0.961206		9.538	0.956473		9.538	0.857652		9.538	0.858509		9.538	0.857831		9.538	0.859528
9.61251	0.953247		9.61251	0.95423		9.61251	0.963274		9.61251	0.958241		9.61251	0.857045		9.61251	0.85784		9.61251	0.858863		9.61251	0.858677
9.68703	0.957304		9.68703	0.95851		9.68703	0.96552		9.68703	0.957595		9.68703	0.856678		9.68703	0.859217		9.68703	0.857974		9.68703	0.859334
9.76154	0.95525		9.76154	0.959504		9.76154	0.96548		9.76154	0.958032		9.76154	0.857131		9.76154	0.857733		9.76154	0.857115		9.76154	0.858084
9.83606	0.957641		9.83606	0.958646		9.83606	0.966766		9.83606	0.959523		9.83606	0.857107		9.83606	0.859378		9.83606	0.858849		9.83606	0.856844
9.91057	0.957961		9.91057	0.960512		9.91057	0.967686		9.91057	0.961259		9.91057	0.854118		9.91057	0.857881		9.91057	0.858303		9.91057	0.856846
9.98509	0.958593		9.98509	0.962695		9.98509	0.969669		9.98509	0.962468		9.98509	0.85427		9.98509	0.856366		9.98509	0.858214		9.98509	0.857526
10.0596	0.961985		10.0596	0.964306		10.0596	0.971791		10.0596	0.963759		10.0596	0.854682		10.0596	0.857851		10.0596	0.858004		10.0596	0.857135
10.1341	0.962553		10.1341	0.964433		10.1341	0.969705		10.1341	0.963304		10.1341	0.854462		10.1341	0.85694		10.1341	0.858581		10.1341	0.855884
10.2086	0.965179		10.2086	0.964116		10.2086	0.971817		10.2086	0.965245		10.2086	0.853608		10.2086	0.856253		10.2086	0.857936		10.2086	0.855381
10.2832	0.967064		10.2832	0.967361		10.2832	0.973327		10.2832	0.966972		10.2832	0.853673		10.2832	0.855941		10.2832	0.857249		10.2832	0.854134
10.3577	0.967542		10.3577	0.96639		10.3577	0.974376		10.3577	0.967927		10.3577	0.854128		10.3577	0.85566		10.3577	0.85559		10.3577	0.855869
10.4322	0.969884		10.4322	0.969308		10.4322	0.973358		10.4322	0.969713		10.4322	0.852925		10.4322	0.855551		10.4322	0.855701		10.4322	0.857406
10.5067	0.969811		10.5067	0.969631		10.5067	0.976105		10.5067	0.970827		10.5067	0.853957		10.5067	0.857086		10.5067	0.856409		10.5067	0.856868
10.5812	0.971177		10.5812	0.972903		10.5812	0.976801		10.5812	0.971509		10.5812	0.852741		10.5812	0.85672		10.5812	0.856615		10.5812	0.855578
10.6557	0.971781		10.6557	0.973966		10.6557	0.978865		10.6557	0.972027		10.6557	0.853218		10.6557	0.855845		10.6557	0.855555		10.6557	0.85548
10.7302	0.974249		10.7302	0.975232		10.7302	0.98083		10.7302	0.973668		10.7302	0.852195		10.7302	0.855814		10.7302	0.856396		10.7302	0.854043
10.8048	0.976827		10.8048	0.976857		10.8048	0.980231		10.8048	0.97409		10.8048	0.852067		10.8048	0.855145		10.8048	0.856846		10.8048	0.855459
10.8793	0.975246		10.8793	0.975881		10.8793	0.981602		10.8793	0.974831		10.8793	0.852079		10.8793	0.854494		10.8793	0.854584		10.8793	0.85334
10.9538	0.975765		10.9538	0.979036		10.9538	0.982107		10.9538	0.978836		10.9538	0.851151		10.9538	0.855602		10.9538	0.853833		10.9538	0.853516
11.0283	0.977451		11.0283	0.980279		11.0283	0.983357		11.0283	0.980477		11.0283	0.852344		11.0283	0.854552		11.0283	0.853425		11.0283	0.852548
11.1028	0.97846		11.1028	0.981464		11.1028	0.985229		11.1028	0.981063		11.1028	0.851157		11.1028	0.854947		11.1028	0.853546		11.1028	0.853991
11.1773	0.97964		11.1773	0.98352		11.1773	0.98827		11.1773	0.982431		11.1773	0.851067		11.1773	0.854129		11.1773	0.852233		11.1773	0.851605
11.2519	0.98197		11.2519	0.982894		11.2519	0.989083		11.2519	0.986704		11.2519	0.850258		11.2519	0.854441		11.2519	0.852644		11.2519	0.853716
11.3264	0.981832		11.3264	0.984691		11.3264	0.990485		11.3264	0.985804		11.3264	0.851382		11.3264	0.855448		11.3264	0.852742		11.3264	0.852254
11.4009	0.982643		11.4009	0.984283		11.4009	0.990557		11.4009	0.98554		11.4009	0.852219		11.4009	0.856562		11.4009	0.854225		11.4009	0.852943
11.4754	0.984081		11.4754	0.986012		11.4754	0.992272		11.4754	0.988426		11.4754	0.851529		11.4754	0.855073		11.4754	0.852404		11.4754	0.852597
11.5499	0.987575		11.5499	0.989017		11.5499	0.992919		11.5499	0.989972		11.5499	0.852756		11.5499	0.854085		11.5499	0.853641		11.5499	0.851795
11.6244	0.988937		11.6244	0.990424		11.6244	0.994362		11.6244	0.990285		11.6244	0.851563		11.6244	0.854192		11.6244	0.852252		11.6244	0.852455
11.6989	0.98503		11.6989	0.989171		11.6989	0.997358		11.6989	0.99054		11.6989	0.851261		11.6989	0.853095		11.6989	0.852195		11.6989	0.853327
11.7735	0.98888		11.7735	0.991427		11.7735	0.998385		11.7735	0.994463		11.7735	0.850767		11.7735	0.852441		11.7735	0.852279		11.7735	0.853978
11.848	0.988852		11.848	0.991895		11.848	0.998993		11.848	0.995922		11.848	0.8509		11.848	0.853292		11.848	0.852741		11.848	0.852904
11.9225	0.989403		11.9225	0.992698		11.9225	1.0009		11.9225	0.994899		11.9225	0.850136		11.9225	0.852735		11.9225	0.852372		11.9225	0.852418
11.997	0.991526		11.997	0.994836		11.997	1.00228		11.997	0.995435		11.997	0.849882		11.997	0.850669		11.997	0.851258		11.997	0.852318
12.0715	0.994128		12.0715	0.997233		12.0715	1.00208		12.0715	0.996608		12.0715	0.851204		12.0715	0.851724		12.0715	0.851982		12.0715	0.853135
12.146	0.995215		12.146	0.998526		12.146	1.00148		12.146	0.998122		12.146	0.850713		12.146	0.85265		12.146	0.851324		12.146	0.851418
12.2206	0.995389		12.2206	0.997796		12.2206	1.00457		12.2206	0.997717		12.2206	0.850571		12.2206	0.851595		12.2206	0.851644		12.2206	0.853721
12.2951	0.998428		12.2951	1.00062		12.2951	1.0058		12.2951	1.00097		12.2951	0.850863		12.2951	0.851011		12.2951	0.850557		12.2951	0.852532
12.3696	0.997934		12.3696	1.00126		12.3696	1.0075		12.3696	1.00144		12.3696	0.849518		12.3696	0.851719		12.3696	0.85094		12.3696	0.851449
12.4441	1.00056		12.4441	1.00185		12.4441	1.00823		12.4441	1.00153		12.4441	0.849644		12.4441	0.852857		12.4441	0.850308		12.4441	0.851933
12.5186	1.00191		12.5186	1.00197		12.5186	1.0098		12.5186	1.00234		12.5186	0.848872		12.5186	0.852302		12.5186	0.851441		12.5186	0.851353
12.5931	1.00309		12.5931	1.00331		12.5931	1.01094		12.5931	1.00315		12.5931	0.850648		12.5931	0.85187		12.5931	0.850288		12.5931	0.850357
12.6677	1.00279		12.6677	1.00483		12.6677	1.01231		12.6677	1.00379		12.6677	0.851061		12.6677	0.850039		12.6677	0.850212		12.6677	0.850724
12.7422	1.00557		12.7422	1.00542		12.7422	1.01311		12.7422	1.00569		12.7422	0.850587		12.7422	0.849479		12.7422	0.849463		12.7422	0.850541
12.8167	1.00469		12.8167	1.0087		12.8167	1.01526		12.8167	1.00691		12.8167	0.850795		12.8167	0.849762		12.8167	0.850511		12.8167	0.850671
12.8912	1.0064		12.8912	1.00842		12.8912	1.01452		12.8912	1.00988		12.8912	0.849805		12.8912	0.849104		12.8912	0.850741		12.8912	0.850136
12.9657	1.00806		12.9657	1.00997		12.9657	1.0152		12.9657	1.01141		12.9657	0.849191		12.9657	0.849529		12.9657	0.848902		12.9657	0.849908
13.0402	1.00932		13.0402	1.01083		13.0402	1.01839		13.0402	1.01397		13.0402	0.849037		13.0402	0.84923		13.0402	0.850486		13.0402	0.851022
13.1147	1.01033		13.1147	1.01216		13.1147	1.01987		13.1147	1.01392		13.1147	0.849498		13.1147	0.849612		13.1147	0.849087		13.1147	0.850346
13.1893	1.00947		13.1893	1.01135		13.1893	1.02214		13.1893	1.01627		13.1893	0.849377		13.1893	0.848009		13.1893	0.849618		13.1893	0.849632
13.2638	1.01207		13.2638	1.01571		13.2638	1.02319		13.2638	1.0165		13.2638	0.846965		13.2638	0.848637		13.2638	0.849792		13.2638	0.850526
13.3383	1.01321		13.3383	1.01637		13.3383	1.02407		13.3383	1.01484		13.3383	0.846527		13.3383	0.84776		13.3383	0.849251		13.3383	0.849328
13.4128	1.0157		13.4128	1.01686		13.4128	1.0243		13.4128	1.01767		13.4128	0.84798		13.4128	0.849077		13.4128	0.848713		13.4128	0.851009
13.4873	1.0157		13.4873	1.01705		13.4873	1.02439		13.4873	1.01866		13.4873	0.848107		13.4873	0.847878		13.4873	0.849289		13.4873	0.849424
13.5618	1.01634		13.5618	1.01699		13.5618	1.02849		13.5618	1.01855		13.5618	0.848166		13.5618	0.849913		13.5618	0.848679		13.5618	0.849817
13.6364	1.01915		13.6364	1.01853		13.6364	1.02681		13.6364	1.02287		13.6364	0.847685		13.6364	0.849716		13.6364	0.84815		13.6364	0.849261
13.7109	1.01932		13.7109	1.0189		13.7109	1.02951		13.7109	1.02379		13.7109	0.848505		13.7109	0.848709		13.7109	0.847897		13.7109	0.849546
13.7854	1.01973		13.7854	1.02129		13.7854	1.03157		13.7854	1.02473		13.7854	0.849281		13.7854	0.849952		13.7854	0.848919		13.7854	0.849882
13.8599	1.02328		13.8599	1.0212		13.8599	1.03259		13.8599	1.02433		13.8599	0.848181		13.8599	0.849945		13.8599	0.848222		13.8599	0.84857
13.9344	1.02441		13.9344	1.02091		13.9344	1.03361		13.9344	1.02563		13.9344	0.84912		13.9344	0.848538		13.9344	0.848874		13.9344	0.849461
14.0089	1.02614		14.0089	1.02267		14.0089	1.03392		14.0089	1.02793		14.0089	0.849326		14.0089	0.850718		14.0089	0.848849		14.0089	0.848764
14.0834	1.02582		14.0834	1.02443		14.0834	1.03494		14.0834	1.02701		14.0834	0.848464		14.0834	0.848528		14.0834	0.849086		14.0834	0.849673
14.158	1.02748		14.158	1.02673		14.158	1.03357		14.158	1.02795		14.158	0.848234		14.158	0.848424		14.158	0.848916		14.158	0.850556
14.2325	1.02788		14.2325	1.02466		14.2325	1.03595		14.2325	1.02747		14.2325	0.848436		14.2325	0.848637		14.2325	0.847599		14.2325	0.848934
14.307	1.0287		14.307	1.02695		14.307	1.03696		14.307	1.03068		14.307	0.847969		14.307	0.849364		14.307	0.848668		14.307	0.849737
14.3815	1.02982		14.3815	1.02611		14.3815	1.03956		14.3815	1.02934		14.3815	0.848249		14.3815	0.849027		14.3815	0.847567		14.3815	0.849116
14.456	1.02893		14.456	1.02839		14.456	1.03973		14.456	1.03209		14.456	0.847506		14.456	0.848056		14.456	0.848359		14.456	0.850667
14.5305	1.0321		14.5305	1.02907		14.5305	1.04041		14.5305	1.03278		14.5305	0.847902		14.5305	0.848664		14.5305	0.848419		14.5305	0.848154
14.6051	1.03202		14.6051	1.03065		14.6051	1.04159		14.6051	1.03268		14.6051	0.846996		14.6051	0.847847		14.6051	0.848019		14.6051	0.849292
14.6796	1.03349		14.6796	1.03088		14.6796	1.04046		14.6796	1.03355		14.6796	0.845806		14.6796	0.847639		14.6796	0.84727		14.6796	0.848519
14.7541	1.03487		14.7541	1.03379		14.7541	1.0415		14.7541	1.03648		14.7541	0.845579		14.7541	0.846914		14.7541	0.847333		14.7541	0.847583
14.8286	1.03544		14.8286	1.03407		14.8286	1.04345		14.8286	1.03738		14.8286	0.846074		14.8286	0.8481		14.8286	0.848266		14.8286	0.848453
14.9031	1.03723		14.9031	1.03599		14.9031	1.04413		14.9031	1.03813		14.9031	0.844391		14.9031	0.846813		14.9031	0.848177		14.9031	0.848979
14.9776	1.03903		14.9776	1.03473		14.9776	1.04681		14.9776	1.03952		14.9776	0.846147		14.9776	0.84737		14.9776	0.847346		14.9776	0.848523
15.0522	1.03992		15.0522	1.03758		15.0522	1.04644		15.0522	1.03839		15.0522	0.84548		15.0522	0.847752		15.0522	0.846646		15.0522	0.848588
15.1267	1.04024		15.1267	1.03795		15.1267	1.04869		15.1267	1.04069		15.1267	0.846105		15.1267	0.847475		15.1267	0.846832		15.1267	0.847924
15.2012	1.04172		15.2012	1.04004		15.2012	1.04925		15.2012	1.04346		15.2012	0.846689		15.2012	0.848137		15.2012	0.847225		15.2012	0.847019
15.2757	1.04369		15.2757	1.03981		15.2757	1.04814		15.2757	1.04292		15.2757	0.846184		15.2757	0.847541		15.2757	0.847257		15.2757	0.847224
15.3502	1.04246		15.3502	1.04113		15.3502	1.05032		15.3502	1.04314		15.3502	0.845771		15.3502	0.848049		15.3502	0.846334		15.3502	0.84885
15.4247	1.04428		15.4247	1.03979		15.4247	1.05151		15.4247	1.04595		15.4247	0.845798		15.4247	0.84598		15.4247	0.846378		15.4247	0.849123
15.4992	1.04639		15.4992	1.04171		15.4992	1.05157		15.4992	1.04453		15.4992	0.846494		15.4992	0.846932		15.4992	0.847124		15.4992	0.848603
15.5738	1.04827		15.5738	1.04296		15.5738	1.05216		15.5738	1.04907		15.5738	0.845532		15.5738	0.846577		15.5738	0.846415		15.5738	0.848261
15.6483	1.04997		15.6483	1.04501		15.6483	1.0534		15.6483	1.04897		15.6483	0.845882		15.6483	0.847169		15.6483	0.847656		15.6483	0.848575
15.7228	1.05097		15.7228	1.04518		15.7228	1.05512		15.7228	1.05166		15.7228	0.845956		15.7228	0.847071		15.7228	0.846889		15.7228	0.847702
15.7973	1.05234		15.7973	1.04339		15.7973	1.05704		15.7973	1.05171		15.7973	0.846059		15.7973	0.845551		15.7973	0.846292		15.7973	0.848183
15.8718	1.05508		15.8718	1.04598		15.8718	1.05887		15.8718	1.05111		15.8718	0.847171		15.8718	0.846251		15.8718	0.847484		15.8718	0.847888
15.9463	1.05181		15.9463	1.04808		15.9463	1.05891		15.9463	1.05284		15.9463	0.846269		15.9463	0.846772		15.9463	0.846741		15.9463	0.847151
16.0209	1.05531		16.0209	1.04822		16.0209	1.06189		16.0209	1.05509		16.0209	0.844571		16.0209	0.845645		16.0209	0.846288		16.0209	0.846966
16.0954	1.05479		16.0954	1.05042		16.0954	1.06048		16.0954	1.05688		16.0954	0.844768		16.0954	0.846544		16.0954	0.845549		16.0954	0.847011
16.1699	1.05667		16.1699	1.04959		16.1699	1.0623		16.1699	1.05692		16.1699	0.845127		16.1699	0.845078		16.1699	0.848067		16.1699	0.847417
16.2444	1.05727		16.2444	1.0533		16.2444	1.0624		16.2444	1.05743		16.2444	0.845485		16.2444	0.845806		16.2444	0.847962		16.2444	0.847164
16.3189	1.05771		16.3189	1.05407		16.3189	1.06356		16.3189	1.05779		16.3189	0.84433		16.3189	0.84557		16.3189	0.846796		16.3189	0.846904
16.3934	1.05867		16.3934	1.0532		16.3934	1.06282		16.3934	1.05967		16.3934	0.843314		16.3934	0.844229		16.3934	0.84577		16.3934	0.845732
16.4679	1.06006		16.4679	1.05467		16.4679	1.06523		16.4679	1.06069		16.4679	0.842893		16.4679	0.845529		16.4679	0.847194		16.4679	0.846375
16.5425	1.06173		16.5425	1.05423		16.5425	1.06861		16.5425	1.06169		16.5425	0.844297		16.5425	0.844244		16.5425	0.846345		16.5425	0.84744
16.617	1.0613		16.617	1.0552		16.617	1.06667		16.617	1.06127		16.617	0.843976		16.617	0.845734		16.617	0.846934		16.617	0.847094
16.6915	1.06155		16.6915	1.05812		16.6915	1.07059		16.6915	1.06422		16.6915	0.844745		16.6915	0.847435		16.6915	0.845912		16.6915	0.847885
16.766	1.06441		16.766	1.05774		16.766	1.07014		16.766	1.06554		16.766	0.845322		16.766	0.846684		16.766	0.846184		16.766	0.846565
16.8405	1.06475		16.8405	1.05847		16.8405	1.07033		16.8405	1.06323		16.8405	0.843285		16.8405	0.845957		16.8405	0.8442		16.8405	0.846456
16.915	1.06743		16.915	1.06016		16.915	1.07303		16.915	1.06499		16.915	0.842846		16.915	0.845907		16.915	0.845463		16.915	0.845907
16.9896	1.0684		16.9896	1.06198		16.9896	1.07153		16.9896	1.06707		16.9896	0.843637		16.9896	0.846033		16.9896	0.845764		16.9896	0.847301
17.0641	1.06595		17.0641	1.05946		17.0641	1.07433		17.0641	1.06912		17.0641	0.842938		17.0641	0.846627		17.0641	0.843599		17.0641	0.847508
17.1386	1.06885		17.1386	1.06226		17.1386	1.07667		17.1386	1.06802		17.1386	0.841968		17.1386	0.844665		17.1386	0.844047		17.1386	0.846476
17.2131	1.06936		17.2131	1.0623		17.2131	1.07503		17.2131	1.06992		17.2131	0.8428		17.2131	0.844595		17.2131	0.844922		17.2131	0.846482
17.2876	1.06946		17.2876	1.06521		17.2876	1.07507		17.2876	1.06992		17.2876	0.841488		17.2876	0.844929		17.2876	0.845017		17.2876	0.84774
17.3621	1.07061		17.3621	1.06563		17.3621	1.07852		17.3621	1.07159		17.3621	0.842697		17.3621	0.845242		17.3621	0.84515		17.3621	0.845226
17.4366	1.0707		17.4366	1.06441		17.4366	1.07877		17.4366	1.07104		17.4366	0.841824		17.4366	0.843444		17.4366	0.844723		17.4366	0.845186
17.5112	1.07019		17.5112	1.06443		17.5112	1.07828		17.5112	1.0734		17.5112	0.843605		17.5112	0.843569		17.5112	0.844272		17.5112	0.844856
17.5857	1.07272		17.5857	1.06591		17.5857	1.08063		17.5857	1.07514		17.5857	0.842995		17.5857	0.843917		17.5857	0.844184		17.5857	0.845088
17.6602	1.07286		17.6602	1.06778		17.6602	1.07866		17.6602	1.0764		17.6602	0.843589		17.6602	0.843529		17.6602	0.843758		17.6602	0.845598
17.7347	1.07579		17.7347	1.06843		17.7347	1.07957		17.7347	1.0771		17.7347	0.842818		17.7347	0.843797		17.7347	0.84403		17.7347	0.845725
17.8092	1.07495		17.8092	1.06831		17.8092	1.08139		17.8092	1.07829		17.8092	0.843017		17.8092	0.843283		17.8092	0.844308		17.8092	0.84637
17.8837	1.07591		17.8837	1.0686		17.8837	1.08356		17.8837	1.08015		17.8837	0.843584		17.8837	0.843035		17.8837	0.844484		17.8837	0.846235
17.9583	1.07695		17.9583	1.07078		17.9583	1.08453		17.9583	1.08122		17.9583	0.844423		17.9583	0.84132		17.9583	0.846867		17.9583	0.845094
18.0328	1.07716		18.0328	1.07108		18.0328	1.08483		18.0328	1.08274		18.0328	0.843245		18.0328	0.842758		18.0328	0.847188		18.0328	0.845235
18.1073	1.07886		18.1073	1.07073		18.1073	1.0862		18.1073	1.08272		18.1073	0.84346		18.1073	0.842827		18.1073	0.846517		18.1073	0.846417
18.1818	1.08255		18.1818	1.07067		18.1818	1.08708		18.1818	1.0821		18.1818	0.843565		18.1818	0.842617		18.1818	0.845912		18.1818	0.845677
18.2563	1.08217		18.2563	1.07225		18.2563	1.08553		18.2563	1.08068		18.2563	0.842505		18.2563	0.843275		18.2563	0.844994		18.2563	0.845051
18.3308	1.08426		18.3308	1.07396		18.3308	1.08663		18.3308	1.0836		18.3308	0.841876		18.3308	0.84332		18.3308	0.846248		18.3308	0.844087
18.4054	1.08075		18.4054	1.07565		18.4054	1.09052		18.4054	1.08478		18.4054	0.842679		18.4054	0.84373		18.4054	0.845114		18.4054	0.845135
18.4799	1.08273		18.4799	1.07491		18.4799	1.08931		18.4799	1.08377		18.4799	0.84367		18.4799	0.84155		18.4799	0.846484		18.4799	0.844815
18.5544	1.08477		18.5544	1.07629		18.5544	1.09072		18.5544	1.08622		18.5544	0.842536		18.5544	0.841601		18.5544	0.845153		18.5544	0.845341
18.6289	1.08528		18.6289	1.0784		18.6289	1.0894		18.6289	1.08608		18.6289	0.842514		18.6289	0.843374		18.6289	0.845077		18.6289	0.845176
18.7034	1.08356		18.7034	1.08187		18.7034	1.09192		18.7034	1.08683		18.7034	0.844334		18.7034	0.842399		18.7034	0.8459		18.7034	0.845734
18.7779	1.08672		18.7779	1.08197		18.7779	1.09263		18.7779	1.08531		18.7779	0.842601		18.7779	0.842597		18.7779	0.844245		18.7779	0.845707
18.8524	1.08748		18.8524	1.08285		18.8524	1.08925		18.8524	1.08807		18.8524	0.840134		18.8524	0.844039		18.8524	0.845539		18.8524	0.846037
18.927	1.08785		18.927	1.08242		18.927	1.09229		18.927	1.08859		18.927	0.841446		18.927	0.842547		18.927	0.844354		18.927	0.844933
19.0015	1.09021		19.0015	1.08192		19.0015	1.09162		19.0015	1.08971		19.0015	0.840842		19.0015	0.842587		19.0015	0.845315		19.0015	0.844555
19.076	1.08904		19.076	1.08223		19.076	1.09305		19.076	1.09008		19.076	0.841359		19.076	0.843333		19.076	0.845511		19.076	0.843351
19.1505	1.08858		19.1505	1.08545		19.1505	1.094		19.1505	1.09074		19.1505	0.840143		19.1505	0.845721		19.1505	0.84616		19.1505	0.844082
19.225	1.09081		19.225	1.08631		19.225	1.09665		19.225	1.09279		19.225	0.841031		19.225	0.843721		19.225	0.845479		19.225	0.844664
19.2995	1.09173		19.2995	1.08356		19.2995	1.09375		19.2995	1.0932		19.2995	0.839633		19.2995	0.844693		19.2995	0.844552		19.2995	0.844503
19.3741	1.09224		19.3741	1.08622		19.3741	1.0968		19.3741	1.09376		19.3741	0.840265		19.3741	0.842307		19.3741	0.845204		19.3741	0.844965
19.4486	1.09521		19.4486	1.08653		19.4486	1.09638		19.4486	1.09475		19.4486	0.840785		19.4486	0.841783		19.4486	0.844665		19.4486	0.844129
19.5231	1.09425		19.5231	1.08637		19.5231	1.09603		19.5231	1.09623		19.5231	0.841243		19.5231	0.84216		19.5231	0.845197		19.5231	0.844824
19.5976	1.09651		19.5976	1.08618		19.5976	1.09684		19.5976	1.09812		19.5976	0.840371		19.5976	0.842895		19.5976	0.844628		19.5976	0.843965
19.6721	1.09742		19.6721	1.08938		19.6721	1.09743		19.6721	1.09704		19.6721	0.84046		19.6721	0.843645		19.6721	0.845479		19.6721	0.843518
19.7466	1.09814		19.7466	1.09058		19.7466	1.09816		19.7466	1.09894		19.7466	0.840637		19.7466	0.844033		19.7466	0.844731		19.7466	0.843529
19.8211	1.09869		19.8211	1.08906		19.8211	1.10093		19.8211	1.10047		19.8211	0.841392		19.8211	0.843178		19.8211	0.844134		19.8211	0.844389
19.8957	1.09655		19.8957	1.08943		19.8957	1.10125		19.8957	1.10267		19.8957	0.840654		19.8957	0.843266		19.8957	0.84506		19.8957	0.844138
19.9702	1.09934		19.9702	1.09263		19.9702	1.10034		19.9702	1.10154		19.9702	0.840848		19.9702	0.841366		19.9702	0.845248		19.9702	0.844084
20.0447	1.09836		20.0447	1.09139		20.0447	1.10183		20.0447	1.10404		20.0447	0.842254		20.0447	0.842037		20.0447	0.845877		20.0447	0.843584
20.1192	1.09859		20.1192	1.09392		20.1192	1.10338		20.1192	1.10313		20.1192	0.841669		20.1192	0.84216		20.1192	0.844992		20.1192	0.845362
20.1937	1.10106		20.1937	1.09376		20.1937	1.10441		20.1937	1.10358		20.1937	0.841588		20.1937	0.842604		20.1937	0.846358		20.1937	0.84537
20.2682	1.10269		20.2682	1.09474		20.2682	1.10424		20.2682	1.1021		20.2682	0.842597		20.2682	0.841363		20.2682	0.845196		20.2682	0.844206
20.3428	1.10309		20.3428	1.09612		20.3428	1.10726		20.3428	1.10428		20.3428	0.842851		20.3428	0.841568		20.3428	0.844753		20.3428	0.844875
20.4173	1.1024		20.4173	1.09516		20.4173	1.10646		20.4173	1.10661		20.4173	0.841628		20.4173	0.842417		20.4173	0.844197		20.4173	0.843138
20.4918	1.10409		20.4918	1.09774		20.4918	1.10664		20.4918	1.10523		20.4918	0.840587		20.4918	0.842761		20.4918	0.845242		20.4918	0.844245
20.5663	1.10372		20.5663	1.09613		20.5663	1.10865		20.5663	1.10524		20.5663	0.840819		20.5663	0.841843		20.5663	0.846292		20.5663	0.843444
20.6408	1.10563		20.6408	1.09357		20.6408	1.10872		20.6408	1.10674		20.6408	0.84129		20.6408	0.840961		20.6408	0.844716		20.6408	0.842797
20.7153	1.10518		20.7153	1.0941		20.7153	1.11072		20.7153	1.10911		20.7153	0.841381		20.7153	0.841604		20.7153	0.8447		20.7153	0.844296
20.7899	1.10764		20.7899	1.09877		20.7899	1.10983		20.7899	1.10966		20.7899	0.839707		20.7899	0.840024		20.7899	0.845416		20.7899	0.843991
20.8644	1.10843		20.8644	1.09679		20.8644	1.11102		20.8644	1.11176		20.8644	0.842		20.8644	0.841534		20.8644	0.84514		20.8644	0.844882
20.9389	1.10636		20.9389	1.09765		20.9389	1.11214		20.9389	1.11003		20.9389	0.841557		20.9389	0.842114		20.9389	0.845067		20.9389	0.843268
21.0134	1.11586		21.0134	1.1078		21.0134	1.11952		21.0134	1.12036		21.0134	0.845721		21.0134	0.847207		21.0134	0.850095		21.0134	0.848282
21.0879	1.14355		21.0879	1.13319		21.0879	1.14326		21.0879	1.14397		21.0879	0.863253		21.0879	0.866158		21.0879	0.868983		21.0879	0.867663
21.1624	1.15452		21.1624	1.14734		21.1624	1.15579		21.1624	1.15647		21.1624	0.873789		21.1624	0.873851		21.1624	0.876863		21.1624	0.875389
21.2369	1.16265		21.2369	1.15213		21.2369	1.16491		21.2369	1.16453		21.2369	0.877901		21.2369	0.879469		21.2369	0.882236		21.2369	0.88211
21.3115	1.16851		21.3115	1.15863		21.3115	1.17086		21.3115	1.17061		21.3115	0.882612		21.3115	0.883344		21.3115	0.887458		21.3115	0.886402
21.386	1.17423		21.386	1.1623		21.386	1.17682		21.386	1.17544		21.386	0.887195		21.386	0.887205		21.386	0.889358		21.386	0.889833
21.4605	1.17788		21.4605	1.16724		21.4605	1.18402		21.4605	1.17728		21.4605	0.890113		21.4605	0.889972		21.4605	0.893209		21.4605	0.894148
21.535	1.18349		21.535	1.16981		21.535	1.18399		21.535	1.1809		21.535	0.891789		21.535	0.892638		21.535	0.897332		21.535	0.897342
21.6095	1.18723		21.6095	1.17435		21.6095	1.18948		21.6095	1.18543		21.6095	0.89421		21.6095	0.895346		21.6095	0.900293		21.6095	0.900446
21.684	1.19223		21.684	1.17747		21.684	1.19212		21.684	1.18723		21.684	0.897824		21.684	0.897604		21.684	0.902076		21.684	0.902269
21.7586	1.19387		21.7586	1.18111		21.7586	1.19745		21.7586	1.18973		21.7586	0.899026		21.7586	0.900298		21.7586	0.903963		21.7586	0.904307
