# Supplementary material for: Structure–function analysis of Lactiplantibacillus plantarum DltE reveals D-alanylated lipoteichoic acids as direct cues supporting Drosophila juvenile growth
Source: eLife. 2023 Apr 12;12:e84669. doi: 10.7554/eLife.84669 (PMC10241514; doi:10.7554/eLife.84669)
Supplement: Figure 3—source data 2. [file elife-84669-fig3-data2.xlsx]

## Sheet: Figure 3d
	D-Ala	Gro-D-Ala
Control	1	1
DltE	1.26776	0.442767
DltE (x2)	1.86114	0.361696
DltE(S128A)	1.18328	1.02927
DacA1	1.08961	0.996264
