# Supplementary material for: Structure–function analysis of Lactiplantibacillus plantarum DltE reveals D-alanylated lipoteichoic acids as direct cues supporting Drosophila juvenile growth
Source: eLife. 2023 Apr 12;12:e84669. doi: 10.7554/eLife.84669 (PMC10241514; doi:10.7554/eLife.84669)
Supplement: Figure 4—source data 1. [file elife-84669-fig4-data1.xlsx]

## Sheet: Figure 4
Figure 4a
NC8	∆dtlE	DltES128A
268	80.8212	16.1642
297	86.8513	20.0168
280	99.0234	19.5283
275.49		18.5
298.941		21.58
279.091		18
282.16
277.77
286.2
Figure 4b
NC8	∆dltE	DltES128A	GF
3.717	2.786	3.45	2.752
3.932	3.566	3.476	2.348
4.22	3.214	3.137	2.821
4.274	3.165	3.07	2.239
4.39	3.407	3.197	3.13
4.245	2.916	3.498	2.349
4.183	2.844	3.323	2.246
4.379	2.267	3.527	2.289
4.762	3.198	3.367	2.499
3.771	3.093	3.595	2.328
3.709	3.3	3.235	2.64
4.061	3.085	3.012	2.166
4.369	3.317	3.351	2.43
4.101	3.194	3.686	2.524
3.833	2.638	2.879	2.619
4.108	2.512	2.794	1.962
4.298	3.323	3.662	2.371
4.125	3.1	2.99	2.372
4.126	2.785	3.276	2.977
4.034	3.408	3.03	3.176
3.879	2.701	2.998	2.825
4.154	3.131	2.956	2.372
4.083	2.841	3.168	2.483
4.704	2.658	3.253	2.678
4.072	3.133	3.347	2.361
4.364	3.116	2.748	2.309
3.473	2.635	3.422	2.37
4.275	3.2	3.268	2.635
4.568	2.659	3.978	2.231
4.216	3.151	4.042	2.444
4.173	3.12	2.768	2.276
4.568	3.359	2.717	2.025
3.968	3.552	3.343	3.459
4.453	2.894	3.284	2.489
4.259	3.25	3.059	2.304
4.249	3.279	2.713	2.725
4.248	3.174	2.913	1.994
4.335	2.544	3.221	2.463
4.167	3.386	2.685	2.417
4.597	3.162	3.573	2.998
3.832	2.598	3.523	3.116
4.12	3.455	2.456	2.556
4.164	3.393	3.057	2.387
4.19	3.093	3.851	2.119
4.119	2.835	2.883	2.449
4.635	3.409	3.114	3.338
3.917	2.772	3.317	2.327
3.964	3.029	2.994	2.198
3.902	3.235	3.06	2.621
4.309	3.088	3.104	2.19
3.885	2.975	3.31	2.336
4.315	2.883	2.573	2.259
3.999	2.785	3.547	2.044
4.531	3.578	2.701	2.118
4.249	2.62	3.182	2.967
4.019	3.098	3.14	2.027
4.267	3.318	3.04	2.132
4.388	3.071	2.786
4.244	3.333	3.011
4.48	3.276	2.751
	2.677	3.664
	3.328	2.603
	3.524	2.494
	2.836	2.836
	3.328	3.328
	3.541	3.541
	3.293	3.293
	3.83	3.83
	3.602	3.602
	3.018	3.018
	3.198	3.198
	2.947	2.947
	3.51	3.51
Figure 4c
NC8	∆dtlE	DltES128A	GF
8.05	8.91	10	11.72
8.83	8.5	9.84	11.71
8.34	9.38	10.33	12.06
8.35	9.17	9	11.87
7.5	9.12	9.19	12
8.55	8.72	9.31	12.14
8.33	9.78	9.46	12.07
8.43	10.03	8.94	12.17
7.86	9.55	8.8	12.04
Figure 4d
	NC8	NC8	NC8	∆dltE	∆dltE	∆dltE	DltES128A	DltES128A	DltES128A
0	1600000	2900000	2800000	5000000	2200000	1500000	8000000	7000000	3000000
3	2400000	1400000	1800000	3100000	350000	2700000	400000	6000000	2000000
5	4200000	2800000	1800000	710000	950000	1700000	900000	670000	800000
7	3600000	3400000	3700000	300000	910000	1300000	700000	900000	2200000
