# Supplementary material for: Structure–function analysis of Lactiplantibacillus plantarum DltE reveals D-alanylated lipoteichoic acids as direct cues supporting Drosophila juvenile growth
Source: eLife. 2023 Apr 12;12:e84669. doi: 10.7554/eLife.84669 (PMC10241514; doi:10.7554/eLife.84669)
Supplement: Figure 4—source data 2. [file elife-84669-fig4-data2.xlsx]

## Sheet: Figure 4
Figure 4 - Figure supplement 1a
	NC8	∆dltE	DltES128A	GF		NC8	∆dltE	DltES128A	GF
	4.545	2.726	2.812	2.815		4.793	3.16	3.564	2.675
	4.287	2.767	2.323	2.405		4.267	2.414	2.617	2.381
	4.39	3.6	3.051	2.253		4.467	3.415	2.526	2.372
	4.203	3.648	3.015	2.507		4.239	3.573	2.475	2.482
	4.413	3.257	3.229	2.458		4.322	3.559	3.186	3.064
	4.451	3.024	3.283	2.345		4.439	3.231	3.009	2.548
	3.906	3.041	3.098	2.456		4.732	3.612	3.14	2.636
	4.03	3.802	2.826	2.562		4.732	3.042	3.327	2.449
	4.162	3.09	2.979	2.464		4.187	3.495	2.418	2.719
	4.378	3.607	3.009	2.201		4.228	2.825	2.357	2.587
	4.643	2.838	3.008	2.2		4.67	3.361	3.604	2.522
	4.966	3.792	3.214	2.588		4.723	3.172	3.241	2.494
	4.408	3.408	3.261	2.494		4.934	3.14	3.5	2.554
	4.145	3.084	3.504	2.435		4.378	2.914	3.304	2.419
	4.682	3.653	2.614	2.591		4.876	3.578	3.793	2.314
	4.65	3.816	3.221	2.433		4.93	3.559	3.393	2.371
	4.006	3.761	2.917	2.181		4.273	2.59	2.926	2.336
	4.19	3.728	3.419	2.474		4.715	3.336	3.393	2.79
	4.076	3.109	3.273	2.495		4.641	2.528	2.857	2.359
	4.49	3.765	3.259	2.349		4.481	3.734	2.843	2.598
	4.618	3	2.999	2.578		4.881	4.038	3.414	2.465
	4.699	3.248	3.468	2.623		3.876	3.402	3.177	2.531
	4.189	3.639	3.403	2.242		4.599	3.813	3.177	2.435
	4.228	3.97	3.019	2.511		4.706	3.826	3.381	2.538
	4.799	3.704	2.875	2.243		4.387	3.286	2.776	2.347
	4.014	3.554	3.853	2.478		4.128	3.267	2.87	2.417
	4.376	3.305	3.118	2.025		3.823	2.471	2.81	2.722
	4.669	3.586	3.556	2.405		4.809	3.766	3.058	2.409
	4.485	3.345	3.266	2.424		4.745	2.296	3.14	2.701
	4.532	3.444	3.447	2.251		4.367	2.808	2.889	2.505
	4.388	2.912	2.659	2.383		4.912	2.921	3.065	2.621
	4.42	3.731	2.903	2.289		3.866	2.973	3.278	2.382
	4.076	3.262	3.018	2.181		4.948	3.963	2.581	2.513
	4.501	3.026	2.521	2.42		4.474	3.395	3.036	2.556
	4.997	3.109	3.527	2.192		4.583	3.245	3.683	2.32
	4.542	2.931	3.533	2.321		4.972	3.229	3.306	2.623
	4.332	3.435	3.274	2.474		4.251	3.65	3.168	2.573
	4.383	2.675	3.043	2.811		4.665	3.456	3.54	2.345
	4.474	2.796	3.11	2.578		4.515	3.062	2.877	2.883
	4.635	3.132	3.161	2.402		4.122	3.357	2.849	2.329
	4.379	2.491	3.329	2.212		4.264	2.765	3.154	2.78
	4.734	3.07	3.219	2.339		4.222	2.462	2.743	2.567
	4.353	3.508	3.285	2.385		4.229	3.755	2.852	2.51
	4.197	3.873	3.424	2.152		4.182	3.101	3.113	2.529
	4.417	2.857	2.629	2.316		4.214	3.515	2.867	2.384
	4.325	3.428	2.206	2.641		4.115	3.146	3.162	2.32
	4.486	3.047	2.434	2.496		4.528	3.566	3.345	2.342
	4.125	2.802	2.967	2.449		4.391	3.049	3.195	2.395
	4.154	3.087	3.603	2.496		4.362	3.086	3.031	2.301
	4.111	3.26	3.343	2.649		4.323	3.177	3.164	2.978
	4.283	3.182	3.327	2.408		4.411	3.14	3.359	2.41
	4.53	3.625	3.22			4.259	2.978	3.341	2.564
	3.78	3.421	3.338			4.341	3.238	3.465	2.875
	4.537	3.028	3.381			4.301	3.095	3.08
	4.269	2.596	2.852				2.906	3.451
	4.46	2.876	3.42				3.645	3.457
	4.439	3.011	2.906				3.164	3.464
	4.368	2.297	3.379				3.281	2.166
	4.254						3.188	3.649
	4.284						2.432	3.529
							3.44	2.74
								3.348
								2.744
								2.376
								2.984
								3.167
								2.883
								3.242
Figure 4 - Figure supplement 1b
	NC8	∆dtlE	DltES128A	GF		NC8	∆dtlE	DltES128A	GF
	8.55	8.72	10.31	12.14		8.39	10.21	9.53	13.12
	8.33	9.78	9.46	12.07		8.62	9.65	10.72	13.25
	8.43	10.03	9.94	12.17		8.18	9.42	10.52	13.09
	7.86	9.55	9.8	12.04		9.04	9.61	10.6	12.83
	7.5	9.12	9.19	12		7.5	9.74	10.4	12.93
Figure 4 - Figure supplement 1c
		NC8	NC8	NC8	∆dltE	∆dltE	∆dltE	DltES128A	DltES128A	DltES128A			NC8	NC8	NC8	∆dltE	∆dltE	∆dltE	DltES128A	DltES128A	DltES128A
	0	1600000	2900000	2800000	5000000	2200000	1500000	8000000	7000000	3000000		0	3100000	1240000	1490000	2100000	1200000	1500000	4600000	2200000	3000000
	3	2240000	1490000	2300000	3000000	2000000	4500000	2500000	860000	2400000		3	2300000	2100000	1900000	5600000	1200000	1650000	1400000	1000000	1600000
	5	2300000	2100000	1900000	1000000	1700000	500000	1600000	1600000	1800000		5	3000000	1600000	1700000	1000000	950000	1500000	700000	1200000	800000
	7	3000000	1600000	1700000	2800000	800000	2350000	1200000	6000000	6000000		7	4000000	3600000	2300000	521000	4000000	2620000	2950000	2600000	2650000
