# Supplementary material for: Structure–function analysis of Lactiplantibacillus plantarum DltE reveals D-alanylated lipoteichoic acids as direct cues supporting Drosophila juvenile growth
Source: eLife. 2023 Apr 12;12:e84669. doi: 10.7554/eLife.84669 (PMC10241514; doi:10.7554/eLife.84669)
Supplement: Figure 5—source data 1. [file elife-84669-fig5-data1.xlsx]

## Sheet: Figure 5
Figure 5a
yw_NC8	dredd_NC8	yw_∆dltop	dredd_∆dltop	yw_∆ltaS	dredd_∆ltaS	yw_∆tagO	dredd_∆tagO	yw_GF	dredd_GF
4.215	4.254	2.018	1.933	3.457	1.695	4.544	4.235	2.266	1.966
4.213	4.14	3.76	2.157	3.092	3.331	4.013	4.12	2.431	2.011
4.25	4.453	2.7	2.416	3.047	2.162	3.242	4.576	1.893	1.871
4.353	4.31	3.119	3.105	3.063	2.035	3.975	4.246	2.144	1.977
4.522	4.624	3.331	2.213	3.263	1.846	3.405	4.04	1.523	2.252
4.259	4.686	2.759	2.268	3.273	2.536	4.373	4.171	2.319	1.587
4.35	4.721	1.739	2.079	3.691	1.772	3.639	4.344	2.139	1.653
4.296	4.41	2.893	2.509	3.234	1.838	4.068	3.468	2.422	2.404
4.081	4.701	2.548	1.909	2.663	1.937	4.371	3.763	1.849	1.897
4.261	4.916	2.261	2.35	3.484	2.295	3.494	4.216	2.025	1.974
4.482	4.08	3.071	3.139	3.231	2.25	4.059	3.918	1.617	1.962
4.454	4.476	3.446	2.406	2.643	2.244	4.011	4.515	2.092	1.875
3.666	4.04	2.914	2.055	3.297	1.99	3.885	4.578	2.328	1.823
4.228	4.293	3.094	1.933	2.86	1.956	4.317	3.823	2.124	1.593
4.542	4.655	3.322	2.256	2.538	2.473	4.141	4.451	2.012	1.946
4.517	4.354	2.213	2.133	3.179	1.964	4.254	4.428	1.887	2.089
3.747	4.204	3.31	2.27	3.471	2.39	4.085	3.957	2.032	1.761
4.64	4.351	3.203	2.063	3.05	2.258	4.018	4.865	2.187	1.787
3.886	4.363	3.63	3.116	2.352	2.416	3.834	4.276	2.068	1.575
4.041	4.782	3.167	2.254	3.299	2.157	4.427	4.183	1.883	2.032
4.369	4.59	3.15	2.052	3.098	1.756	4.263	4.156	2.094	2.069
3.975	4.782	2.295	2.704	3.54	1.827	4.262	4.412	1.818	2.22
3.605	4.053	3.245	1.97	2.642	3.507	3.892	4.119	2.089	1.799
4.022	3.967	3.122	1.908	3.672	2.143	3.828	4.341	2.028	2.215
3.867	4.328	3.409	2.219	3.451	1.771	4.202	4.854	2.282	1.958
4.36	4.179	3.467	2.321	3.556	3.192	4.062	4.396	1.909	1.775
4.13	4.142	2.958	2.064	3.517	2.191	3.66	3.859	1.902	2.085
4.695	3.857	2.765	3.343	3.906	3.098	3.223	3.655	2.118	2.055
3.848	4.93	2.853	1.792	3.58	1.871	4.039	4.093	1.783	1.962
4.507	3.731	2.669	2.451	3.461	1.901	3.915	3.662	2.238	1.599
4.036	4.189	2.25	1.985	2.161	1.815	3.703	4.468	2.59	1.81
4.339	4.891	2.866	2.911	3.297	3.064	3.884	5.065	2.088	2.09
4.308	4.726	3.297	3.106	3.857	2.191	4.501	4.279	1.801	1.665
4.613	4.503	3.4	3.262	3.301	1.747	3.918	4.972	2.047	2.212
3.678	4.597	3.379	1.964	3.443	2.094	4.114	5.309	1.761	2.203
4.456	4.142	3.116	2.748	2.926	2.253	3.632	4.43	2.249	1.868
4.222	4.274	3.513	1.92	3.298	2.617	3.983	4.288	2.043	1.691
3.93	4.131	3.829	2.992	2.295	2.443	4.167	4.097	2.203	1.967
4.528	4.065	2.906	2.143	3.098	3.02	4.042	4.042	1.826	1.882
3.832	4.563	2.418	3.317	3.411	2.114	3.636	4.512	2.169	1.994
3.95	4.578	3.606	2.578	3.246	2.324	4.265	4.842	1.68	1.851
4.18	4.309	3.543	1.82	3.662		3.843		1.885	1.873
4.39	4.186	3.276	2.086	3.573		3.99		2.082
4.742	4.362		3.043	3.726		4.178		1.931
4.568	4.31		2.033	3.81		4.229
4.385	4.394					4.058
3.954	4.422
4.433	4.4
4.401	3.816
4.138
4.098
Figure 5c
yw_NC8	yw_∆dltop	yw_∆ltaS	yw_∆tagO	GF	dredd_NC8	dredd_∆dltop	dredd_∆ltaS	dredd_∆tagO	GF
2.5481	1.8934	1.6463	2.2892	0.0728	0.4373	0.0916	0.0481	0.2465	0.0522
3.9544	1.4276	1.4615	2.5259	0.1035	0.4351	0.0606	0.0916	0.2724	0.1206
3.0437	1.4548	1.1926	2.5089	0.1471	0.8037	0.0663	0.0623	0.1792	0.0918
1.9897	1.6122	1.1508	2.7129	0.1348	0.3663	0.0897	0.0506	0.2457	0.1253
1.9083	1.7569	1.8768	2.9407	0.1324	0.5659	0.0646	0.0844	0.1836	0.0717
2.765	1.8622	1.1463	3.0146	0.0961	0.6319	0.1363	0.1353	0.4462	0.0688
Figure 5d
yw_NC8	yw_∆dltop	yw_∆ltaS	yw_∆tagO	GF	dredd_NC8	dredd_∆dltop	dredd_∆ltaS	dredd_∆tagO	GF
6.8502	4.8453	5.2604	5.4746	2.2399	5.4491	3.1411	2.356	4.4656	1.2744
8.0064	5.7583	4.4011	5.1826	2.9368	7.7238	2.4051	3.2711	5.7577	2.4734
5.6492	5.4934	4.2683	6.7511	4.186	6.9171	2.6704	2.8214	4.9039	2.5054
5.6569	4.4401	4.3121	9.8389	3.4998	6.2175	3.343	1.947	6.1038	2.4826
5.1962	4.486	4.4816	9.3577	3.4423	5.3646	2.7674	2.9891	4.8021	1.6067
5.7795	4.5842	3.5341	9.123	3.0611	5.528	3.696	3.0825	6.002	1.663
