# Supplementary material for: Structure–function analysis of Lactiplantibacillus plantarum DltE reveals D-alanylated lipoteichoic acids as direct cues supporting Drosophila juvenile growth
Source: eLife. 2023 Apr 12;12:e84669. doi: 10.7554/eLife.84669 (PMC10241514; doi:10.7554/eLife.84669)
Supplement: Figure 5—source data 2. [file elife-84669-fig5-data2.xlsx]

## Sheet: Supplementary figure 7
Figure 5 - Figure supplement 1a
	NC8	∆dltop	∆ltaS	∆tagO
	455.664	9	125.875	393.336
	375.947	9	174.718	361.578
	353.981	10	179.233	444.162
	268	9.74	117	262.73
	297	10.23	116	253.6
	280	11.1	134	247.03
	275.49	11.06	92.4628	230.56
	298.941	11.52	76.8708	260.34
	279.091	11.86	85.1205	287.49
	282.16		72.59
	277.77		84.01
	286.2		89.43
Figure 5 - Figure supplement 1c
	y,w	NC8	NC8	NC8	∆dltop	∆dltop	∆dltop	∆ltaS	∆ltaS	∆ltaS	∆tagO	∆tagO	∆tagO		dreddF64	NC8	NC8	NC8	∆dltop	∆dltop	∆dltop	∆ltaS	∆ltaS	∆ltaS	∆tagO	∆tagO	∆tagO
	0	1600000	2900000	2800000	17000000	8000000	12000000	7000000	7000000	5000000	16000000	9000000	8000000		0	2200000	1500000	1000000	800000	1000000	5000000	5000000	600000	900000	1700000	1100000	1000000
	3	2400000	1400000	1800000	1500000	4000000	1000000	7000000	800000	4000000	2900000	1300000	3700000		3	7500000	9300000	6800000	2200000	610000	1900000	1600000	1200000	700000	600000	6400000	7400000
	5	7200000	6800000	2800000	3900000	1400000	6000000	1200000	500000	120000	8200000	7600000	9600000		5	7700000	7400000	8600000	9100000	8200000	4700000	1100000	2700000	3100000	8400000	7300000	5000000
	7	9600000	3400000	5700000	10600000	9500000	9000000	3200000	2000000	2200000	2500000	2400000	6500000		7	7500000	8900000	7600000	11900000	14700000	11100000	10400000	12300000	9400000	19000000	8000000	9200000
	y,w	NC8	NC8	NC8	∆dltop	∆dltop	∆dltop	∆ltaS	∆ltaS	∆ltaS	∆tagO	∆tagO	∆tagO		dreddF64	NC8	NC8	NC8	∆dltop	∆dltop	∆dltop	∆ltaS	∆ltaS	∆ltaS	∆tagO	∆tagO	∆tagO
	0	2650000	1350000	1450000	1250000	2200000	2600000	3550000	2950000	4300000	1400000	2000000	9000000		0	15000000	1250000	13000000	6500000	3500000	4000000	7000000	6000000	3000000	11500000	7000000	8000000
	3	8000000	4000000	8000000	3000000	2000000	1400000	3000000	4800000	4400000	4000000	4200000	2000000		3	5400000	5400000	7100000	2500000	2100000	2600000	1000000	8000000	6000000	6900000	5400000	5100000
	5	4000000	1400000	1200000	6000000	4000000	4520000	600000	2000000	2000000	8000000	4000000	2000000		5	1300000	3800000	2300000	3200000	2100000	2500000	1600000	4300000	1900000	8000000	1700000	2400000
	7	4000000	3600000	8000000	120000	1200000	8000000	1400000	4000000	8500000	1600000	1200000	3520000		7	2300000	4500000	1670000	2400000	1100000	2500000	2460000	3200000	1190000	1600000	3750000	1300000
	y,w	NC8	NC8	NC8	∆dltop	∆dltop	∆dltop	∆ltaS	∆ltaS	∆ltaS	∆tagO	∆tagO	∆tagO		dreddF64	NC8	NC8	NC8	∆dltop	∆dltop	∆dltop	∆ltaS	∆ltaS	∆ltaS	∆tagO	∆tagO	∆tagO
	0	4850000	5500000	5800000	1150000	2250000	2600000	3600000	1900000	3450000	2850000	3450000	3250000		0	1700000	1350000	5200000	6500000	3500000	2310000	3050000	1050000	9500000	5630000	3250000	1500000
	3	1450000	10000000	3150000	8500000	900000	1650000	1850000	5200000	1750000	2050000	2300000	1550000		3	3350000	14500000	18500000	4250000	4050000	3300000	9500000	8500000	3700000	2750000	14000000	15000000
	5	4800000	4750000	4600000	13500000	8500000	9000000	2300000	15000000	2000000	34000000	3350000	2900000		5	3600000	1150000	4300000	2600000	3500000	7250000	9500000	2850000	2450000	1450000	18000000	1850000
	7	29000000	23500000	27500000	14500000	1700000	10000000	30000000	25000000	3250000	2500000	17000000	2400000		7	3250000	3650000	3350000	1860000	2500000	5000000	1980000	3500000	2000000	1000000	1500000	3850000
