# Supplementary material for: Structure–function analysis of Lactiplantibacillus plantarum DltE reveals D-alanylated lipoteichoic acids as direct cues supporting Drosophila juvenile growth
Source: eLife. 2023 Apr 12;12:e84669. doi: 10.7554/eLife.84669 (PMC10241514; doi:10.7554/eLife.84669)
Supplement: Figure 5—source data 3. [file elife-84669-fig5-data3.xlsx]

## Sheet: Figure 5
Figure 5 - Figure supplement 2a
	yw_NC8	dredd_NC8	yw_∆dltop	dredd_∆dltop	yw_∆ltaS	dredd_∆ltaS	yw_∆tagO	dredd_∆tagO	yw_GF	dredd_GF		yw_NC8	dredd_NC8	yw_∆dltop	dredd_∆dltop	yw_∆ltaS	dredd_∆ltaS	yw_∆tagO	dredd_∆tagO	yw_GF	dredd_GF
	4.5	3.729	3.168	2.792	2.154	2.324	4.544	4.042	2.055	1.966		4.2	3.926	3.231	1.933	3.471	1.818	4	4.423	2.452	2.587
	4.138	4.353	2.566	2.504	3.4	2.86	4.013	4.512	2.205	2.011		4.215	4.223	2.666	2.157	3.05	1.695	4.26	4.132	2.15	2.253
	4.124	4.397	2.72	1.766	3.06	2.273	3.242	4.342	2.157	1.871		4.213	4.126	3.821	2.416	2.352	2.331	4.208	3.669	2.266	2.404
	4.316	4.274	2.166	2.148	2.87	2.221	3.975	4.235	1.904	1.977		4.25	4.05	2.486	3.105	3.299	2.162	4.743	3.878	2.431	1.897
	4.065	4.309	2.414	2.27	2.904	2.466	4.405	4.12	2.057	2.252		4.353	4.226	2.347	2.213	3.098	2.035	3.858	4.332	1.893	1.974
	3.971	4.405	2.555	2.294	2.768	2.809	4.373	4.576	2.258	1.987		4.522	4.254	3.29	2.268	3.54	1.846	4.394	4.169	2.144	1.962
	4.101	4.681	2.396	3.035	2.725	2.533	4.639	4.246	2.271	2.253		4.259	4.14	2.314	2.079	2.642	2.536	3.819	3.838	1.523	1.875
	4.251	4.149	2.53	2.223	2.685	2.223	4.068	4.04	2.147	2.404		4.35	4.453	2.081	2.509	3.672	1.772	4.209	4.073	2.319	1.823
	4.564	4.762	3.605	2.941	2.606	2.979	4.371	4.381	2.244	1.897		4.296	4.31	2.018	1.909	3.451	1.838	4.266	3.688	2.139	1.993
	3.722	4.462	2.7	1.971	3.209	2.221	4.494	4.227	2.01	1.974		4.081	4.624	3.76	2.35	3.556	1.937	4.452	3.989	2.422	1.946
	4.632	4.427	2.37	2.25	3.006	2.51	4.059	4.171	1.734	1.962		4.261	4.686	2.7	3.139	3.517	2.295	4.127	3.569	1.849	2.289
	4.563	4.097	2.69	1.708	3.063	2.307	4.011	4.344	2.352	1.875		4.482	4.121	3.119	2.406	3.906	2.25	4.648	3.856	2.025	1.961
	4.301	4.414	2.892	1.967	3.074	2.819	3.885	3.468	2.257	2.46		4.454	4.41	3.331	2.055	3.58	2.244	4.39	4.452	1.617	2.487
	3.866	4.166	3.638	1.838	2.37	2.471	4.317	3.763	2.248	2.593		3.866	4.101	2.759	1.933	3.461	1.99	4.066	4.186	2.092	1.975
	3.985	4.552	3.576	2.16	3.125	1.653	4.141	3.798	2.292	1.946		4.228	4.116	1.739	2.256	2.161	2.956	4.098	4.001	2.328	2.232
	4.603	4.599	2.418	2.019	3.455	2.508	4.254	4.216	1.59	2.289		4.542	4.08	2.893	2.133	3.297	2.473	4.539	3.78	2.124	2.269
	4.146	4.618	2.359	2.391	3.062	2.364	4.085	3.918	1.412	1.961		4.517	4.476	2.548	2.27	3.857	1.964	4.092	3.811	2.012	2.22
	4.184	4.669	2.432	2.17	2.36	2.269	4.018	4.515	2.137	1.887		3.947	4.04	2.261	2.063	3.301	2.39	4.155	4.223	1.887	2.036
	4.173	4.251	3.055	1.912	3.186	2.317	3.834	4.578	2.178	2.575		4.64	4.293	3.071	3.116	3.443	2.258	4.211	4.405	2.032	2.215
	4.268	4.321	2.369	2.854	3.095	2.384	4.427	3.823	1.834	2.332		3.886	4.655	3.446	2.254	2.926	2.416	4.126	4.243	2.187	1.958
	4.267	4.263	3.17	2.141	2.896	2.082	4.263	4.451	2.195	2.169		4.041	4.354	2.914	2.052	3.298	2.157	4.348	4.412	2.068	2.475
	3.945	4.381	2.256	2.19	3.04	2.27	4.262	4.428	2.224	2.22		4.369	4.204	3.094	2.704	2.295	1.756	4.51	4.395	1.883	2.085
	4.122	4.197	2.793	1.888	2.748	3.142	3.892	3.957	2.188	1.995		3.975	4.351	3.322	1.97	3.098	1.827	4.853	4.156	2.094	2.055
	4.155	4.347	3.428	2.406	2.639	2.602	3.828	4.165	2.448	2.215		3.605	4.363	2.213	1.908	3.411	2.507	4.11	4.26	1.818	1.962
	4.17	4.584	2.362	2.334	2.17	2.139	4.202	4.276	2.266	1.958		4.022	4.782	3.31	2.219	3.246	2.143	3.815	3.897	2.089	2.599
	4.36	4.291	2.621	2.414	3.713	1.943	4.062	4.183	2.481	2.278		3.867	4.59	3.203	2.321	3.662	1.771	4.507	4.533	2.028	1.91
	3.78	4.153	3.565	2.285	3.529	2.448	4.66	4.156	2.255	2.085		4.36	4.182	3.63	2.064	3.573	2.192	4.197	3.982	2.282	2.09
	4.178	4.383	2.264	2.487	2.994	2.647	4.223	4.412	2.074	2.355		4.13	4.053	3.167	3.343	3.726	2.191	4.48	4.225	1.909	2.315
	4.356	4.593	3	2.181	3.601	2.647	4.039	4.119	1.503	1.962		4.695	3.967	3.15	1.792	3.81	3.098	3.92	4.203	1.902	2.212
	4.061	4.306	2.888	2.39	2.602	1.883	3.915	4.341	2.202	2.599		3.848	4.328	2.295	2.451		1.871	3.915	4.264	2.118	2.203
	4.14	4.1	3.013	2.331	2.307	2.096	3.703	4.654	2.124	1.81		4.507	4.179	3.245	1.985		1.901	4.347	4.577	1.783	1.868
	4.543	4.214	3.134	2.772	2.065	2.502	3.884	4.396	2.404	2.09		4.036	4.142	3.122	2.911		1.815	3.854	3.692	2.238	1.991
	3.985	4.22	3.274	2.04	2.918	2.928	4.501	3.859	1.75	1.865		4.339	3.857	3.409	3.106		3.064	3.997	4.114	2.29	1.967
	3.704	4.375	3.334	2.108	3.457	3.004	3.918	3.655	2.3	2.212		4.308	4.03	3.467	3.262		2.191	4.235	4.278	2.088	1.882
	4.533	4.315	3.011	2.337	3.092	2.944	4.114	4.093	2.202	2.203		4.613	3.731	2.958	1.964		1.747	4.569	4.512	1.801	1.994
	4.308	4.419	2.802	2.137	3.047	2.782	4.532	3.662	2.303	1.868		3.678	4.189	2.765	2.748		2.594	3.956	3.889	2.047	1.851
	3.957	4.625	2.267	2.077	3.063	2.406	3.983	4.468	2.212	1.991		4.456	4.391	2.853	1.92		2.253	4.084	4.342	1.761	1.973
	4.155	3.701	3.492	2.321	3.263	2.723	4.167	5.065	2.184	1.967		4.222	4.126	2.669	2.992		2.617	4.391	4.055	2.249
	3.782	4.078	2.223	2.234	3.273	2.019	4.042	4.279	2.378	1.882		3.93	4.503	2.25	2.143		2.443	4.296	3.904	2.043
	4.204	4.784	2.336	2.281	3.691	2.968	4.636	4.972	2.06	1.994		4.528	4.597	2.866	3.317		2.52	4.269	3.918	2.203
	3.726	4.349	3.317	3.208	3.234	2.386	4.265	5.309	2.144	1.851		3.832	4.142	3.297	2.578		2.114	3.878	3.818	1.826
	4.223	4.756	3.481	2.166	2.663	1.659	3.843	4.43	2.145	1.873		3.95	4.274	3.4	1.82		2.324	3.925	3.942	2.169
	4.346	4.152	2.62	2.317	3.484	2.404	3.99	4.288	1.972	1.966		4.18	4.131	3.379	2.086			3.787	4.133	1.68
	4.294	4.14	2.911	1.932	3.231	2.152	4.178	4.097	2.329	2.511		4.39	4.065	3.116	3.043			4.311	4.062	1.885
	4.315	4.203	3.118	2.123	2.643	2.293	4.229	4.042	2.018	1.871		4.742	4.563	3.513	2.033			4.405	4.659	2.082
	4.512	4.621	3.503	2.089	3.297	2.702	4.058	4.512	1.985	1.977		4.568	4.578	3.829				4.5	4.368	1.731
	4.224	4.053	3.128	2	2.86	2.15	3.864	4.142	2.289	2.252		4.385	4.309	2.906					4.033
	4.194	4.126	2.289	2.416	2.538	2.142		4.692				3.954	4.186	2.418					4.459
	4.005	4.368	2.329	2.137	3.179	2.074		3.928				4.433	4.362	3.606					3.831
	3.727	4.58	2.535	2.046								4.401	4.31	3.543					4.275
	4.007	4.514	2.225	1.896								4.138	4.394	3.276					4.352
	4.042	4.044	3.124	2.812								4.098	4.422						4.654
	4.01	4.204	2.533	2.258									4.4						3.984
	4.341	4.259	3.16	2.274									3.816						3.747
	4.337	4.013	3.173	2.464															4.064
			3.001	3.475															4.139
																			4.294
Figure 5 - Figure supplement 2b
	yw_NC8	yw_∆dltop	yw_∆ltaS	yw_∆tagO	GF	dredd_NC8	dredd_∆dltop	dredd_∆ltaS	dredd_∆tagO	GF		yw_NC8	yw_∆dltop	yw_∆ltaS	yw_∆tagO	GF	dredd_NC8	dredd_∆dltop	dredd_∆ltaS	dredd_∆tagO	GF
	2.2533	2.4338	2.0421	2.7687	0.0431	0.3149	0.21205	0.0821	0.22975	0.1053		2.889	1.3049	1.9137	3.8689	0.0568	0.2399	0.07409	0.05287	0.2197	0.0899
	3.1159	2.1278	1.9231	2.4473	0.0442	0.4451	0.0811	0.09143	0.26922	0.1084		3.8881	1.8689	1.4495	2.1816	0.0645	0.3173	0.0775	0.0452	0.246	0.0719
	4.5825	1.6978	1.6166	2.8734	0.0457	0.5087	0.09089	0.1163	0.3885	0.1314		3.4668	1.5837	1.7522	2.6024	0.0383	0.2799	0.0521	0.06016	0.2295	0.0676
	2.7869	1.9142	1.0889	2.9668	0.0491	0.3518	0.1921	0.1533	0.2323	0.1522		2.3655	1.287	2.0307	2.3167	0.0625	0.3892	0.0521	0.05002	0.3561	0.0531
	2.4089	1.584	1.6216	2.8639	0.0463	0.4002	0.1811	0.184	0.3006	0.1438		2.6521	1.3258	1.859	2.4025	0.0562	0.3502	0.0489	0.0615	0.132	0.0857
Figure 5 - Figure supplement 2c
	yw_NC8	yw_∆dltop	yw_∆ltaS	yw_∆tagO	GF	dredd_NC8	dredd_∆dltop	dredd_∆ltaS	dredd_∆tagO	GF		yw_NC8	yw_∆dltop	yw_∆ltaS	yw_∆tagO	GF	dredd_NC8	dredd_∆dltop	dredd_∆ltaS	dredd_∆tagO	GF
	6.1336	3.5264	5.247	5.4012	3.2193	4.7408	2.9711	1.781	4.3728	2.423		5.0559	3.9072	4.1599	5.6807	2.3717	4.0889	2.1539	1.6253	5.7089	1.6592
	6.9319	3.3413	4.5974	7.5224	2.6201	4.5355	2.5076	1.6325	4.369	1.921		7.0426	4.8205	2.8397	6.058	1.8956	5.108	1.9531	2.134	5.9351	1.8262
	8.4649	5.9475	4.9054	7.0309	2.4208	6.2332	2.586	2.107	4.402	2.3618		7.0774	4.965	4.2203	5.963	2.698	5.8802	1.7147	1.8686	4.4717	1.6923
	6.908	4.3346	3.6874	5.6177	3.3735	5.4704	3.1051	1.8963	5.108	2.2192		6.1529	4.327	3.7774	8.213	1.9637	5.1798	2.1902	1.7024	5.1902	1.5841
	8.419	4.1629	5.1897	9.3124	2.457	5.7199	2.2468	2.9047	4.5287	2.6319		6.3521	5.147	5.158	6.526	2.013	6.235	2.562	2.254	4.5964	1.752
