# Supplementary material for: Structure–function analysis of Lactiplantibacillus plantarum DltE reveals D-alanylated lipoteichoic acids as direct cues supporting Drosophila juvenile growth
Source: eLife. 2023 Apr 12;12:e84669. doi: 10.7554/eLife.84669 (PMC10241514; doi:10.7554/eLife.84669)
Supplement: Figure 6—source data 1. [file elife-84669-fig6-data1.xlsx]

## Sheet: Figure 6
Figure 6b
NC8	NC8 PGNC8	NC8 PG∆dltxabcd	∆dltop	∆dltop PGNC8	∆dltop PG∆dltxabcd	GF	GF PGNC8	GF PG∆dltxabcd
4.34	4.012	4.184	3.018	3.242	3.484	2.371	2.481	2.328
3.87	4.351	3.898	2.9	3.414	3.204	2.388	2.549	2.22
4.223	3.912	4.185	3.357	3.181	3.257	2.687	2.224	2.318
3.935	3.914	3.93	3.567	2.961	3.161	2.148	2.285	2.105
3.742	4.044	3.752	3.305	3.322	2.931	2.659	2.181	2.007
3.917	3.872	3.844	3.476	3.23	2.912	2.299	2.233	2.076
3.935	3.774	4.176	2.631	2.949	3.25	2.685	1.985	2.118
4.006	4.079	3.917	2.686	3.105	3.217	2.481	2.342	2.342
3.865	4.334	4.163	3.148	3.47	3.138	1.924	2.256	2.073
4.188	3.814	4.638	2.369	3.5	2.858	2.312	2.359	2.331
3.811	4.373	4.291	3.066	3.482	3.416	2.375	2.353	2.328
4.248	4.394	4.073	2.998	3.557	3.512	3.056	2.203	2.309
4.54	4.053	3.782	3.02	3.198	3.03	2.371	2.312	2.268
4.634	4.621	3.609	2.716	3.268	3.473	2.408	2.23	2.239
4.321	4.632	4.112	3.314	3.404	3.433	2.345	2.144	2.537
3.944	4.42	4.318	3.242	3.596	3.229	2.644	2.173	2.387
4.333	4.196	3.61	2.996	3.351	3.101	2.181	2.367	2.036
4.338	4.23	3.999	2.885	3.428	3.378	2.286	2.269	2.332
4.2	4.053	3.755	3.172	3.601	3.833	2.879	2.013	2.377
3.865	4.234	3.659	2.953	2.688	3.31	2.405	2.464	2.294
4.473	3.937	4.077	3.772	3.394	2.889	2.155	2.284	2.115
4.424	4.228	4.278	3.416	3.495	3.184	2.377	2.355	2.179
4.233	3.801	4.062	3.487	2.785	3.166	2.27	2.186	2.47
3.688	3.802	4.117	3.158	2.879	3.302	2.289	2.483	2.192
3.977	4.048	4.086	2.907	3.054	3.316	2.488	2.783	2.309
3.962	4.171	4.364	2.999	3.2	3.275	2.43	2.144	2.031
4.326	4.587	4.11	3.502	3.153	2.911	2.223	2.459	2.374
4.309	4.635	3.85	3.106	3.285	2.634	2.491	2.453	2.42
4.598	4.283	4.223	3.169	3.008	3.178	2.258	2.203	2.488
3.641	3.963	4.32	3.531	3.213	2.698	2.523	2.419	2.34
3.654	4.357	4.215	3.707	3.268	2.664	2.492	2.415	2.596
4.143	3.907	3.939	3.508	3.405	3.166	2.483	2.426	2.451
4.208	4.242	3.918	3.27	3.254	2.937	2.442	2.385	2.541
4.326	4.039	4.277	3.504	3.736	3.291	2.353	2.226	2.081
3.831	4.225	4.087	3.32	3.17	2.964	2.178	2.274	2.221
4.268	4.028	4.125	2.852	3.795	3.551	2.527	2.261	2.069
4.209	4.318	4.183	3.104	3.37	3.129	2.251	2.278	2.485
4.153	4.208	4.351	2.686	3.511	3.432	2.206	2.336	2.244
4.242	3.954	4.505	3.04	3.867	3.415	2.329	2.553	2.166
4.36	4.01	4.267	3.171	3.277	3.41	2.439	2.261	1.95
3.748	3.911	4.483	3.388	3.294	3.628	2.55	2.589	2.069
4.033	3.918	4.15	3.546	3.678	3.578	2.56	2.423	2.36
3.7	3.937	4.327	2.401	3.434	3.489	2.356	2.301	2.194
3.962	4.201	3.921	3.303	3.303	3.228	2.167	2.163	2.356
4.175	3.895	4.264	3.322	3.244	3.627	2.374	2.415	2.425
4.092	4.019	4.167	3.211	3.485	3.685	2.335	2.23	2.333
4.208	4.083	3.788	3.512	3.06	3.176	2.455	2.23	2.281
4.115	4.269	3.902	3.54	3.296	3.498	2.308	2.317	2.172
4.114	4.315	4.408	3.067	2.847	3.157	2.326	2.418	2.359
4.266	3.964	3.664	3.329	3.147	3.238	2.095	1.718	2.051
4.706	4.352	4.13	3.277	3.017	2.951	2.5	2.004	2.231
4.089	3.913	3.837	3.37	3.313	3.369	2.291	1.994	2.424
4.17	4.181	4.146		3.219	3.105	2.462	2.273	2.504
3.932	4.035	3.763			2.885	2.48	2.271	2.146
4.347	3.906	4.134			2.797	2.474	2.355	2.451
4.113	4.13	3.898			3.064	2.492	2.136	2.203
4.485	4.121	4.227				2.376	2.037	2.265
3.711	4.241	3.77				2.326	2.315	2.301
4.136	4.396	3.82					2.145
	3.795	4.161					2.135
	4.738	4.748					1.911
							1.801
Figure 6c
NC8	NC8 WTANC8	NC8 WTA∆dltxabcd	∆dltop	∆dltop WTANC8	∆dltop WTA∆dltxabcd	GF	GF WTANC8	GF WTA∆dltxabcd
4.39	4.031	4.082	3.028	2.1	2.44	2.188	1.885	2.437
4.193	4.486	3.769	3.195	2.617	3.118	3.038	1.991	1.905
4.051	3.881	4.259	3.036	2.932	3.233	2.138	2.637	2.181
4.211	4.809	4.062	3.23	2.175	2.699	2.462	2.209	2.59
3.989	4.222	4.066	3.453	3.209	3.367	2.392	2.612	2.512
4.024	3.991	4.003	3.525	2.623	2.755	2.231	1.906	1.914
3.77	4.454	4.578	3.128	2.99	2.662	2.149	2.477	2.301
4.28	4.053	3.921	3.4	3.257	3.552	2.465	3.281	2.53
4.277	4.195	4.082	3.313	3.498	2.997	2.651	2.694	2.361
4.128	4.171	4.37	3.132	3.029	3.45	2.242	2.456	2.359
3.853	4.375	3.87	3.42	3.236	3.398	2.68	2.642	2.528
3.509	3.775	3.959	3.398	3.081	3.421	2.387	2.462	2.104
4.502	4.005	4.243	2.553	3.253	3.33	2.281	2.382	2.047
3.508	4.285	4.052	3.449	2.455	3.336	2.056	2.467	2.325
4.01	4.393	4.165	3.193	3.151	3.483	2.445	2.105	2.473
3.962	3.907	4.058	3.013	3.367	3.26	2.889	2.229	2.32
3.816	3.44	4.239	3.23	2.783	3.162	2.281	2.242	2.307
4.149	4.12	3.863	3.3	3.388	3.225	2.345	2.356	2.361
4.371	3.469	4.321	3.628	2.803	2.409	2.565	2.347	2.21
4.158	4.581	3.988	3.446	3.389	3.588	2.564	2.314	2.308
4.159	4.282	3.783	3.474	3.725	3.587	2.057	2.287	2.617
4.424	3.756	4.221	3.561	3.371	3.684	2.711	2.128	2.574
4.183	3.99	4.107	3.45	2.968	3.674	2.16	2.132	2.336
4.316	3.96	4.378	3.249	3.313	3.573	2.235	2.553	1.994
4.311	3.813	4.306	3.363	3.079	2.256	2.827	2.397	2.331
3.808	4.328	4.074	3.024	2.596	3.142	2.536	2.414	2.382
3.864	4.349	4.508	3.667	2.961	3.5	3.035	2.307	2.447
4.198	4.318	4.49	2.463	3.384	2.833	2.337	2.434	2.342
4.069	4.438	4.268	3.537	2.575	3.531	2.325	2.012	2.642
4.082	3.949	4.03	3.068	3.05	2.669	2.04	2.405	2.025
4.669	3.82	4.316	3.149	3.73	3.182	2.569	2.188	2.618
3.751	3.906	4.209	3.209	3.152	3.513	2.508	2.307	2.379
4.408	3.841	3.958	2.721	3.815	3.002	2.806	2.405	2.236
3.989	4.295	4.223	2.924	3.684	2.497	2.319	2.522	2.147
3.853	4.128	4.612	3.005	3.019	2.652	2.382	2.465	2.014
4.228	4.236	3.998	3.424	3.128	2.424	2.751	2.63
4.016	3.74	4.376	3.785	3.432	3.37	2.296	2.185
3.743	4.19	3.912	2.852	3.312	3.531	2.291	2.365
3.959	4.18	4.371	3.234	3.43	3.303	2.411	2.719
4.289	3.998	4.348	3.585	3.61	3.2	2.507	2.439
4.424	3.867	4.291	3.193	3.541	3.608	2.126	2.507
3.78	3.686	4.391	3.215	3.832	3.428	2.481	3.143
3.976	3.784	4.153	2.755	3.703	3.607	2.19
4.009	4.28	3.932	2.479	3.462	3.477
4.234	3.875	4.129	3.463	3.691	3.352
4.061	4.05	4.495	3.559	3.744	2.908
4.167	4.027	4.727	3.811	3.826	3.461
4.04	4.062	4.394	3.839	3.279	3.378
4.256	3.895	4.187	3.276	3.364	3.474
3.83	3.967	4.762	3.031	3.584	3.229
3.815	4.241	4.277	3.463	3.197	3.405
4.377	4.246	4.427	3.055	3.13	3.463
3.865	4.408	4.45	2.27	3.605	3.293
3.537	4.298	3.986	2.529	3.609	3.38
4.343	3.68	4.202	2.786	3.691	3.281
4.111	4.62	3.993	2.458	3.516	3.49
4.559	3.949	3.742	3.12	3.605
4.146	4.073	4.009	2.862	3.574
4.23	4.125	3.921	3.072	3.451
4.285	3.855	4.479	3.115	3.238
	4.532	4.323	3.514	3.354
	4.244	4.367	3.48	2.953
	4.024		3.234	3.032
	4.33
Figure 6d
NC8	NC8 LTANC8	NC8 LTA∆dltxabcd	∆dltop	∆dltop LTANC8	∆dltop LTA∆dltxabcd	GF	GF LTANC8	GF LTA∆dltxabcd
4.577	3.784	3.783	3.355	3.636	3.612	2.084	2.373	2.242
4.402	4.194	4.49	3.183	3.408	3.56	2.018	2.448	3.194
4.192	3.896	3.889	2.868	3.319	3.468	2.555	2.305	2.433
3.942	4.288	4.445	2.303	3.676	3.933	2.39	2.874	2.559
4.117	4.042	4.373	2.36	4.096	3.629	2.611	2.339	2.772
4.581	3.909	4.407	3.388	3.773	3.192	2.242	2.37	2.287
4.533	4.313	4.02	3.451	3.513	3.828	2.305	2.178	2.866
4.037	4.601	4.374	3.467	3.823	4.119	2.205	2.396	2.807
4.141	4.613	4.521	2.668	4.422	3.71	2.312	2.177	2.558
4.127	4.058	4.168	3.296	3.598	3.862	2.164	2.271	2.313
4.474	4.231	4.153	2.672	3.899	3.664	2.042	2.539	2.258
4.005	4.063	4.277	3.339	3.833	2.922	1.974	2.296	2.669
4.499	4.249	4.291	3.399	3.82	3.421	2.043	1.908	2.29
4.009	4.521	3.931	3.852	3.869	2.225	2.388	2.295	2.721
3.967	4.443	4.471	3.236	3.359	2.412	3.031	2.85	2.632
4.384	4.368	4.54	3.529	3.793	2.358	2.037	2.184	2.737
4.558	4.436	3.995	3.495	3.718	3.568	2.748	2.202	2.021
4.135	4.462	3.946	3.287	3.71	3.265	2.325	2.194	2.272
4.524	3.814	3.792	2.439	4.182	3.706	2.45	2.444	2.052
4.446	4.517	4.225	3.433	3.659	2.869	2.242	2.79	2.722
4.103	3.966	4.749	3.17	3.93	3.123	2.328	2.863	2.384
3.852	3.823	3.763	3.252	3.938	2.833	2.226	2.205	2.549
4.047	4.404	4.077	3.569	4.692	2.897	2.355	2.957	2.493
4.393	4.224	3.834	3.724	4.01	3.101	2.099	2.236	2.372
3.627	4.352	4.6	3.633	4.033	2.913	2.474	2.118	1.946
4.231	4.031	4.124	3.568	4.061	3.344	2.205	2.014	2.362
4.503	3.979	4.155	3.729	4.058	3.22	2.336	2.102	2.151
4.295	4.06	4.203	2.612	3.988	3.032	2.568	2.422	1.848
4.117	4.5	4.213	3.283	3.588	3.55	2.28	2.432	2.602
3.899	3.695	4.705	3.78	3.57	3.698	2.242	3.168	2.856
4.079	4.421	4.294	3.341	4.206	3.192	2.914	2.288	2.855
4.504	3.856	4.254	3.401	3.862	3.034	2.329	1.978	2.162
4.394	3.943	3.904	3.24	3.885	2.799	2.357	2.181	2.426
4.162	4.474	3.928	3.375	4.445	2.905	2.242	2.264	3.16
4.284	3.989	4.548	3.355	4.051	3.393	2.108	2.313	2.138
4.579	4	3.947	3.548	3.624	3.103	3.191	2.554	1.991
4.116	4.28	3.889	3.426	3.969	2.876	2.961	2.68	2.028
4.317	4.11	3.769	3.576	3.617	3.383	2.481	2.202	2.608
4.042	4.227	4.281	3.578	3.936	3.428	2.766	2.264	2.431
4.594	4.072	4.264	3.372	4.064	3.868	2.443	2.616	2.243
4.235	4.119	4.228	3.35	3.585	3.212	2.853	1.973	2.021
4.626	4.026	4.132	3.1	3.698	3.046	2.461	2.328	2.173
4.652	3.863	3.994	3.194	3.683	2.499	2.014	2.468	2.243
4.02	4.568	4.5	2.635	3.531	2.94	2.142	2.336	2.036
3.573	4.257	4.176	3.252	4.328	3.274	2.702	2.815	2.18
4.051	4.429	4.144	3.276	3.745	2.493	2.724	2.147	2.188
4.279	4.022	4.122	3.169	4.15	3.656	2.222	2.641	2.181
4.291	4.349	4.21	3.409	4.265	3.503	2.555	2.057	2.288
4.057	4.421	4.155	3.812	3.682	3.471	2.429	2.264	2.286
4.5	4.506	4.102	3.181	3.161	3.508	2.727	2.367	2.37
4.115	4.62	4.268	3.418	3.456	3.555	2.35	2.225	1.914
4.017	4.053	4.567	3.615	3.841	3.74		3.261
3.96	4.457	4.52	3.185	3.926	3.103		2.355
4.339	3.696	4.05	3.338	3.966	3.045		2.468
4.383	4.229	4.171		4.152	2.24		2.642
4.39	4.444	4.708		4.179	1.94		2.513
				4.143	3.328		2.91
				3.993			2.705
				3.283
				3.758
Figure 6e
NC8	NC8 LTANC8	NC8 LTA∆dltxabcd	∆dltop	∆dltop LTANC8	∆dltop LTA∆dltxabcd	∆ltaS	∆ltaS LTANC8	∆ltaS LTA∆dltxabcd	GF	GF LTANC8	GF LTA∆dltxabcd
3.926	4.076	4.381	2.659	3.933	2.973	2.311	3.883	2.391	2.494	2.334	2.436
3.929	3.762	4.623	2.443	3.508	2.333	2.619	3.344	3.231	2.619	2.413	2.503
4.26	4.349	4.57	2.513	3.379	3.506	2.158	3.178	2.706	2.357	2.202	2.536
3.616	4.76	3.739	2.86	3.567	3.14	2.227	3.914	2.515	2.282	2.022	2.482
4.143	4.27	4.428	2.989	2.952	3.194	2.711	4.387	3.591	2.13	1.913	2.324
2.96	3.758	4.612	2.6	3.924	2.095	2.464	3.641	3.364	2.591	2.13	1.968
3.955	3.904	4.113	3.024	3.52	3.097	2.399	3.595	3.185	2.815	2.192	1.984
4.571	4.308	3.865	2.757	3.614	3.363	2.65	3.71	3.105	2.396	2.075	1.838
3.592	3.926	4.629	2.394	3.621	2.814	2.448	3.989	2.715	2.511	2.055	2.027
4.406	4.45	4.055	3.07	4.388	3.714	2.343	4.333	3.422	2.285	2.103	2.203
4.404	4.05	4.506	2.232	4.029	3.35	2.815	3.305	2.591	2.462	2.368	2.126
3.665	3.939	4.156	2.387	4.116	2.742	2.721	4.38	2.005	2.254	2.494	2.446
3.98	3.95	3.803	2.432	4.406	2.833	3.112	3.441	3.261	2.226	2.306	2.242
4.181	4.137	3.826	2.827	3.45	2.678	2.443	3.252	2.72	2.435	2.341	2.367
3.461	4.028	4.384	2.379	4.321	2.856	3.578	4.171	2.121	2.108	2.484	2.479
4.671	4.107	3.783	2.766	4.481	2.846	2.952	4.133	3.593	2.507	2.247	1.82
3.909	4.381	4.219	2.414	4.459	2.785	3.245	4.237	3.053	2.351	2.131	2.39
3.411	4.626	4.098	2.847	4.173	3.216	2.725	4.506	2.786	2.418	2.293	2.235
4.304	4.124	4.59	2.481	4.074	3.097	3.471	4.072	2.746	2.488	2.325	2.22
3.654	4.089	4.456	3.127	4.215	2.38	2.853	4.202	3.32	2.335	2.249	2.155
4.495	4.239	4.512	2.861	4.434	2.59	2.183	3.816	3.276	2.305	2.416	1.933
3.716	4.31	4.306	2.14	4.31	3.164	2.358	4.066	2.197	2.449	1.953	1.997
4.327	3.874	4.32	2.076	3.933	2.799	2.938	3.75	3.055	2.222	2.221	1.866
4.444	3.988	4.63	3.677	4.782	3.107	2.674	3.83	3.041	2.14	2.752	2.029
3.853	3.718	4.255	2.732	4.338	3.517	3.363	4.115	3.208	2.022	2.408	2.356
4.112	4.29	4.411	3.198	3.993	2.962	3.309	3.737	2.647	2.646		2.197
3.815	4.198	3.716	3.248	4.676	3.118	2.864	3.519	2.762	2.547		2.194
3.855	4.153	4.613	3.369	3.839	3.345	3.163	4.192	2.554	1.978		2.017
4.293	4.428	3.987	3.241	3.487	3.564	2.989	3.626	3.128	2.309		2.334
3.93	4.059	4.11	2.453	4.182	3.114	2.831	3.596	2.724	2.32		2.234
3.562	4.343	4.349	2.996	3.553	3.498	2.574	3.872	2.575	2.393
4.63	4.539	4.425	3.161	3.871	3.167	2.376	4.201	3.096	2.134
3.744	4.303	4.674	2.515	3.858	3.045	3.316	4.56	3.148	2.111
4.661	4.55	4.71	3.186	3.859	3.356	2.676	3.919	2.657	2.169
4.434	3.813	4.729	3.435	3.76	2.756	3.173	3.776	3.085	1.95
3.998	3.382	4.155	3.816	3.683	3.328	2.655	4.12	2.948	1.885
4.438	4.71	3.885	3.141	3.65	3.068	2.793	3.681	2.821	2.313
4.286	3.689	4.594	2.711	3.673	3.14	2.936	4.236	2.831	2.042
3.63	3.538	4.075	2.823	4.091	2.743	2.453	4.174	2.54	2.056
4.565	4.052	4.596	3.064	3.451	2.608	2.978	4.199	3.12	2.235
3.743	4.301	4.389	3.268	4.571	3.197	2.752	4.173	2.823	2.18
4.405	4.053	4.405	2.951	4.575	2.893	2.961	4.09	2.753	2.647
4.375	4.313	4.239	3.064	4.74	2.373	2.535	4.451	2.219	2.598
4.44	4.378	4.03	2.944	3.998	2.826	3.204	4.919	3.322	2.035
4.121	4.194	4.745	3.055	3.451	3.757	2.893	3.447		2.361
4.355	4.102	3.781	3.888	3.966	3.683	3.201	4.029		2.314
3.252	4.54	4.423	3.019	4.195	3.069	3.682	3.467		2.173
4.069	4.203	4.514	2.731	4.278	3.275	2.54	4.502		2.318
3.612	3.861	4.713	3.106	4.343	3.339	3.24	3.821		2.459
	4.432	4.448		3.876	2.517	3.364			2.457
		4.277		3.4		3.266
		4.212				3.348
		4.321				3.031
		4.271				2.99
						3.405
						3.392
						3.33
						3.174
						2.49
Figure 6f
dredd NC8	dredd ΔltaS	dredd ∆ltaS LTANC8	dredd ∆ltaS LTA∆dltxabcd	dredd GF
0.2399	0.1275	0.1731	0.1005	0.0899
0.3173	0.1245	0.1794	0.1146	0.0719
0.2799	0.1316	0.1736	0.1171	0.0676
0.1892	0.1002	0.2054	0.1512	0.0857
0.2327	0.1519	0.1705	0.1412
Figure 6g
dredd NC8	dredd ΔltaS	dredd ∆ltaS LTANC8	dredd ∆ltaS LTA∆dltxabcd	dredd GF
4.7408	1.781	3.951	1.551	1.3064
4.5355	1.4125	2.3236	1.5501	0.921
3.2332	2.107	3.5915	2.234	1.4218
3.4704	1.8963	2.4501	1.9969	2.2192
5.7199	2.9047	3.279	2.5445	2.6319
