# Supplementary material for: Structure–function analysis of Lactiplantibacillus plantarum DltE reveals D-alanylated lipoteichoic acids as direct cues supporting Drosophila juvenile growth
Source: eLife. 2023 Apr 12;12:e84669. doi: 10.7554/eLife.84669 (PMC10241514; doi:10.7554/eLife.84669)
Supplement: Figure 6—source data 2. [file elife-84669-fig6-data2.xlsx]

## Sheet: Figure 6
Figure 6 - Figure supplement 2a
	NC8	NC8 PGNC8	NC8 PG∆dltxabcd	∆dltop	∆dltop PGNC8	∆dltop PG∆dltxabcd	GF	GF PGNC8	GF PG∆dltxabcd		NC8	NC8 PGNC8	NC8 PG∆dltxabcd	∆dltop	∆dltop PGNC8	∆dltop PG∆dltxabcd	GF	GF PGNC8	GF PG∆dltxabcd
	4.136	4.738	3.748	3.37	3.219	2.885	2.326	2.41	2.301		4.732	4.374	4.481	4.008	2.979	3.119	2.348	2.404	2.268
	4.14	4.596	4.204	3.43	3.242	2.797	2.277	2.445	2.467		4.92	4.087	3.655	3.645	3.507	3.541	2.333	2.396	2.712
	3.643	4.5	4.323	3.33	3.414	3.064	2.423	2.347	1.85		4.238	4.252	4.492	3.325	3.448	3.719	2.45	2.394	2.228
	3.973	4.091	4.279	2.825	3.181	3.484	3.038	2.24	1.788		4.781	4.339	4.208	2.628	3.477	3.08	2.665	2.379	2.723
	4.294	3.553	4.12	3.165	2.961	3.204	2.252	2.185	1.763		4.046	3.969	4.482	3.861	3.355	3.688	2.266	2.594	2.674
	4.252	4.258	4.219	2.878	3.322	3.257	2.231	2.28	1.808		4.091	4.248	3.565	2.691	3.489	3.365	2.796	2.329	2.728
	4.236	4.344	4.202	3.482	3.23	3.161	2.222	2.076	2.352		4.438	3.69	4.506	2.339	3.246	3.274	2.809	2.513	2.095
	3.88	3.979	4.341	3.484	2.949	2.931	2.502	2.009	1.894		3.843	4.935	3.834	2.372	3.315	3.436	2.757	2.581	2.436
	4.4	3.824	4.023	3.299	3.105	2.912	1.995	2.104	2.062		3.917	4.184	4.453	3.469	3.536	3.525	2.731	2.195	2.408
	3.913	4.16	4.574	3.098	3.47	3.25	2.294	2.024	2.011		4.439	4.797	4.259	3.629	3.068	3.203	2.346	2.758	1.833
	4.069	3.566	4.195	3.094	3.5	3.217	2.259	2.016	2.462		3.978	4.09	4.615	3.362	3.458	2.976	2.738	2.78	2.566
	3.9	4.01	4.516	3.51	3.482	3.138	2.173	2.331	2.362		4.221	4.705	4.358	3.925	3.008	3.421	2.473	2.406	2.034
	4.223	4.008	4.508	3.613	3.557	2.858	2.298	2.384	2.223		4.297	4.615	3.547	2.484	3.294	3.543	2.446	2.465	3.014
	4.021	4.358	4.22	3.404	3.198	3.416	2.174	2.398	2.123		3.158	4.485	4.289	2.94	3.231	3.427	2.335	2.497	2.356
	3.976	4.04	3.96	3.397	3.268	3.512	2.491	2.287	1.97		4.168	4.149	3.697	3.587	3.345	4.03	2.666	2.424	2.746
	4.595	3.77	4.737	3.33	3.404	3.43	2.133	1.959	2.082		5.208	4.445	4.353	2.512	3.521	2.79	2.585	2.233	2.394
	4.34	4.15	4.197	3.283	3.596	3.473	2.464	2.277	2.118		4.299	4.493	3.347	2.372	3.472	3.003	2.725	2.433	2.865
	4.31	4.196	4.156	3.366	3.351	3.433	2.395	2.062	2.135		4.14	4.512	4.164	3.446	3.518	3.258	2.526	2.395	2.361
	4.301	4.323	4.031	3.488	3.428	3.229	2.14	2.358	1.944		3.856	3.47	3.787	2.394	3.542	3.083	2.419	2.525	2.44
	3.682	4.344	4.236	3.485	3.601	3.101	2.268	2.221	2.041		3.666	4.079	4.167	2.857	3.36	3.263	2.693	2.579	2.587
	3.85	3.995	3.976	2.772	2.688	3.378	2.432	2.886	1.976		4.601	4.438	3.991	2.536	2.706	3.019	2.353	2.555	2.336
	4.017	4.135	4.394	3.139	3.394	3.833	2.14	1.997	2.234		4.258	3.983	4.535	2.645	2.971	3.221	2.21	2.748	2.378
	3.761	3.967	4.452	3.357	3.611	3.31	2.226	2.492	2.012		4.674	3.526	4.503	3.868	3.126	3.326	2.422	2.721	2.564
	3.914	4.354	3.85	3.476	3.801	2.889	2.029	2.181	2.174		3.737	5.007	4.532	2.731	3.277	3.246	2.809	2.441	2.646
	4.221	3.775	4.29	3.316	3.443	2.934	2.397	2.222	2.273		4.701	4.518	3.626	2.562	2.932	3.466	2.332	2.606	2.205
	4.002	3.818	3.917	3.236	3.971	3.681	2.17	2.394	2.143		3.953	4.059	4.206	3.581	3.142	2.945	2.335	2.501	2.491
	4.464	3.694	3.892	3.023	3.305	3.993	2.404	2.1	2.097		4.451	3.579	4.297	3.635	2.978	3.498	2.586	2.448	2.675
	4.306	3.692	4.036	3.278	3.794	3.214	2.252	2.151	2.036		3.933	3.787	3.59	3.24	2.966	2.948	2.426	2.304	2.462
	4.056	4.123	3.907	2.796	3.516	3.673	2.132	2.226	2.101		4.311	3.871	3.788	2.838	3.582	3.266	2.567	2.411	2.667
	4.138	4.49	3.947	3.625	3.643	3.636	2.027	2.297	2.02		3.819	3.268	4.474	3.556	3.535	2.68	2.302	2.362	2.985
	3.914	3.972	4.153	3.313	3.331	3.157	2.116	2.146	2.327		4.576	3.428	3.818	3.643	3.076	2.831	2.098	2.508	2.567
	3.76	4.295	4.188	2.969	3.467	2.991	2.246	2.129	1.984		3.758	4.213	4.102	3.438	3.346	3.691	2.763	2.774	2.649
	4.407	4.004	4.163	3.135	3.326	3.214	2.677	2.034	2.135		4.722	4.443	3.497	3.807	3.334	3.813	2.572	2.402	2.489
	4.109	4.239	4.208	3.599	3.235	3.231	2.425	2.028	1.969		4.157	3.557	4.394	2.632	2.968	3.414	2.198	2.435	2.021
	4.205	4.51	4.434	2.717	3.326	2.887	1.855	2.201	1.938		4.269	3.748	4.425	2.661	3.429	3.396	2.59	2.537	2.434
	3.638	4.112	4.425	3.693	3.272	3.391	2.225	2.255	2.224		4.781	4.505	4.05	3.175	3.345	3.039	2.492	2.504	2.606
	3.977	3.909	4.238	3.557	3.808	3.413	2.388	2.138	2.201		4.329	4.74	4.433	3.314	3.446	3.725	2.489	2.422	2.342
	3.907	3.912	4.148	3.544	2.847	3.137	2.397	2.29	2.056		4.391	3.017	4.39	3.424	3.193	3.259	2.55	2.632	2.341
	4.155	4.352	4.155	3.219	3.006	3.559	2.133	2.346	1.974		3.774	3.697	4.386	2.759	3.371	3.23	2.571	2.656	2.693
	3.905	4.41	4.09	3.82	3.629	3.376	2.219	2.147	2.086		3.969	4.334	4.345	3.151	3.277	2.917	2.701	2.272	2.591
	4.422	4.308	4.079	3.394	3.778	3.163	1.839	2.083	2.014		3.79	3.64	4.342	2.891	3.519	2.949	2.579	2.791	2.441
	4.46	4.607	4.47	3.148	2.851	2.999	2.132	2.202	2.222		4.022	3.496	4.593	3.005	3.464	3.6	2.692	2.91	2.539
	4.361	4.15	4.512	3.676	2.688	3.405	1.862	2.406	2.014		4.027	3.872	4.641	2.814	3.248	2.615	2.237	3.2	2.452
	4.258	4.446	4.257	2.946	3.014	3.077	2.181	2.653	2.119		3.423	3.217	4.113	3.523	3.635	2.942	2.101	2.475	2.136
	4.398	4.326	4.472	3.488	3.599	3.552	1.94	1.795	2.43		4.435	4.062	4.43	3.436	3.736	3.301	2.275	2.4	2.628
	3.829	4.022	3.97	3.462	3.489	2.922	2.17	2.047	1.859		4.323	3.926	4.343	3.656	3.289	3.328	2.622	2.293	2.26
	4.187	4.32	4.251	2.595	2.98	3.414	2.069	2.068	2.203		3.944	4.236	4.394	3.862	3.399	2.71	2.863	2.486	2.776
	4.517	4.407	4.026	3.422	3.422	2.838	2.541	2.159	2.834		4.189	4.416	4.664	4.101	3.469	2.918	2.54	2.628	2.569
	4.568	3.968	4.433	3.072	3.662	3.735	2.311	2.307	2.141		3.748	4.772	4.489	4.044	3.474	3.697	2.353	2.446	2.53
	4.26	4.402	4.374	3.421	3.167	3.838	2.265	2.095	1.978		4.69	4.261	3.902	3.239	3.476	2.779	2.277	2.429	2.168
	3.967	4.298	4.435	3.399	2.481	3.29	1.838	2.079	2.388		3.756	4.961	4.423	3.684	3.33	3.43	2.411	2.283	2.532
	4.184	4.568	3.844	3.507	3.139	3.364	2.449	2.416	2.252		4.586	4.507	3.946	3.721	3.2	3.076	2.27	2.453	2.653
	3.802	4.144	4.033	3.586	3.287	3.372	2.343	1.971	1.847		3.839	3.891	4.437	2.659	3.551	2.965	2.314	2.369	2.031
	4.587	4.138	4.291	3.521	3.398	3.667	2.025	2.105	2.407		4.079	3.903	4.503	4.156	2.949	3.208		2.282	2.482
	4.409	4.633	4.029	2.741	3.336	3.925	2.017	1.813	1.828			4.243	4.578	3.399	2.389	2.89		2.541	2.603
	4.312	4.132	3.918	3.231	3.043	3.431	2.129	2.331	2.021			4.405	4.186	2.572	2.499	3.636		2.777	2.543
	3.999	4.404	4.077	2.807	3.326	3.406	2.011	2.409	2.237			4.579	3.735	3.062		3.021		2.541	2.608
	3.95		3.575		3.24	3.178	2.229	2.015	2.297			4.607	3.314	2.715		3.359		1.956	2.423
	4.012		4.106		3.654	3.615	1.949	2.45	2.192			4.69				3.777		2.224	2.271
	4.273		4.044		3.308	3.269	1.965	2.209	2.252			4.543				3.494		2.254	2.714
	4.225				3.157			2.202	2.297			4.073				2.915		2.62	1.939
					2.655			2.322	2.126			3.723				3.456		2.317	2.601
					3.251				2.025							3.219		2.188	2.102
					2.95				2.073							2.864		2.324	2.527
					3.428				2.083							3.215		2.821	1.996
					3.118				1.953							3.217		2.523	2.208
					3.438				2.202							3.008		2.419
					3.117				2.805							3.647		2.241
					2.709											3.702
					2.619											3.427
					2.848											3.458
					3.531											3.505
					3.528											2.935
					2.46
					2.542
					3.084
					3.181
					3.6
					3.55
Figure 6 - Figure supplement 2b
	NC8	NC8 WTANC8	NC8 WTAop	dop	op WTANC8	op WTAop	GF	GF WTANC8	GF WTAop		NC8	NC8 WTANC8	NC8 WTAop	dop	op WTANC8	op WTAop	GF	GF WTANC8	GF WTAop
	4.343	3.68	4.202	2.786	3.691	3.281	2.094	2.848	2.246		4.21	4.107	4.022	3.276	3.503	3.344	2.163	2.029	2.297
	4.111	4.62	3.993	2.458	3.516	3.49	2.047	2.303	2.342		4.435	4.142	4.526	3.04	3.722	3.111	2.136	2.175	2.213
	4.559	3.949	3.742	3.12	3.605	3.44	2.306	2.118	2.763		4.133	4.301	3.887	3.335	3.506	3.149	2.135	2.033	2.345
	4.146	4.073	4.009	2.862	3.574	3.118	2.431	2.537	2.043		4.009	4.15	4.583	3.138	3.372	3.458	2.285	1.991	2.059
	4.23	4.125	3.921	3.072	3.451	3.233	2.185	2.294	2.27		3.087	3.619	4.091	3.743	3.099	3.052	2.126	1.925	2.019
	4.285	3.855	4.479	3.115	3.238	2.699	2.201	2.282	2.255		3.476	3.642	4.187	3.751	2.751	3.122	2.255	2.129	2.329
	4.026	4.532	4.323	3.514	3.354	3.367	2.201	2.335	2.468		3.263	4.224	4.286	3.37	3.132	3.784	2.072	2.104	2.394
	4.167	4.244	4.367	3.48	2.953	2.755	2.269	2.685	2.272		4.238	4.08	4.41	3.208	2.883	2.817	2.061	2.116	2.132
	4.262	4.024	4.271	3.234	3.032	2.662	2.083	2.055	2.37		4.409	4.044	3.955	2.937	2.966	2.982	2.272	2.043	2.259
	3.799	4.33	3.89	3.28	2.1	3.552	2.079	2.67	2.606		3.657	4.268	4.329	3.699	3.589	3.162	2.079	2.339	2.269
	4.338	4.197	4.535	3.239	2.617	2.997	2.409	2.222	2.032		3.936	4.173	4.662	2.901	3.113	3.381	2.308	1.916	2.279
	4.28	4.123	3.961	3.328	2.932	3.45	2.055	2.534	2.332		4.503	4.286	3.377	3.28	2.841	3.496	2.274	2.134	2.253
	4.19	4.568	3.98	3.526	3.175	3.398	2.598	2.116	2.172		4.588	4.29	4.167	3.1	3.073	3.517	2.193	2.331	2.054
	4.657	3.885	4.178	3.379	3.209	3.421	2.098	2.432	2.235		4.694	4.015	4.062	3.967	3.033	3.605	2.268	1.874	2.004
	4.227	4.199	3.906	3.528	2.623	3.33	2.635	2.224	2.261		3.928	4.617	4.08	2.406	3.202	3.661	2.215	2.264	2.223
	4.206	4.12	4.058	3.334	2.99	3.336	2.189	2.83	2.127		3.763	4.08	4.524	3.069	3.572	3.563	2.245	1.975	2.205
	4.579	4.046	3.686	3.452	3.257	3.483	2.587	2.526	2.33		4.515	3.427	4.231	3.33	3.666	3.44	2.102	2.057	2.014
	3.91	4.117	4.197	3.373	3.498	3.26	2.174	2.185	2.208		4.006	4.335	3.606	3.062	3.791	3.144	2.229	1.972	2.162
	4.058	4.239	3.488	3.121	3.029	3.162	2.284	2.317	2.202		4.019	4.357	4.88	3.471	2.888	3.836	2.252	2.075	2.384
	4.47	4.028	4.551	3.328	3.236	3.225	2.766	2.453	2.256		3.904	3.478	4.024	3.157	3.531	3.475	2.283	2.045	2.434
	4.278	4.224	3.738	2.418	3.081	3.038	2.348	2.24	1.937		4.221	4.49	4.617	2.513	3.302	3.258	2.003	2.086	2.206
	4.366	3.625	4.157	3.373	3.253	3.019	2.333	2.276	2.32		4.335	3.993	4.205	3.684	2.904	2.147	2.016	2.35	2.188
	3.858	4.206	4.048	3.185	2.455	3.186	2.45	2.329	2.337		4.071	4.054	4.688	3.084	3.128	3.375	2.301	2.033	2.342
	4.321	4.324	3.482	3.605	3.151	2.385	2.665	2.253	2.122		3.649	4.142	4.127	3.371	3.929	2.915	2.521	2.019	2.126
	4.167	4.167	4.384	3.089	3.367	3.475	2.266	2.59	2.339		3.922	4.491	3.366	3.178	3.337	3.092	2.211	1.875	2.124
	4.32	4.288	4.289	3.358	2.783	2.704	2.496	2.492	2.511		3.427	3.965	4.699	3.369	3.349	3.164	2.197	2.029	2.129
	4.391	4.256	4.434	3.13	3.388	2.686	2.309	2.489	2.358		3.84	3.939	4.414	3.482	3.595	3.034	2.136	1.989	2.341
	4.627	4.245	4.249	3.749	3.523	2.585	2.757	2.55	2.098		3.618	4.437	4.113	3.488	3.305	3.3	1.993	2.222	2.086
	4.155	4.431	4.494	3.403	3.568	3.044	2.731	2.571	1.978		4.407	4.307	3.991	3.482	3.321	3.096	2.546	2.195	2.328
	4.683	4.355	4.403	3.308	2.841	2.711	2.346	2.701	2.044		4.257	4.246	4.38	3.44	3.565	2.93	2.163	2.395	2.322
	4.096	3.726	3.962	3.385	3.18	2.427	2.738	2.579	2.309		3.981	4.179	4.525	3.428	3.691	3.567	2.043	2.253	2.178
	3.915	4.117	4.673	3.204	2.954	3.496	2.473	2.692	2.176		4.504	4.434	4.246	3.295	3.76	3.484	2.257	1.968	2.141
	4.322	4.216	5.033	2.326	3.366	3.429	2.446	2.237	1.906		4.393	4.451	4.553	3.41	3.441	3.017	2.033	2.094	2.107
	3.751	4.155	4.348	3.344	3.411	2.969	2.335	2.101	2.236		3.853	4.277	4.534	3.446	3.228	3.091	2.214	2.286	2.337
	4.048	4.051	4.499	3.374	3.159	3.356	2.666	2.275	2.185		3.862	4.206	4.28	2.45	3.275	3.133	2.177	2.092	2.243
	4.108	3.833	4.655	3.231	3.053	3.102	2.585	2.622	2.194		4.146	4.362	4.442	2.72	3.472	2.796	2.137	2.083	2.391
	4.562	4.52	4.364	3.095	3.307	2.93	2.725	2.863	1.928		3.915	3.73	3.738	3.123	3.417	3.637	2.161	2.142	2.289
	4.419	4.162	3.948	3.2	3.076	3.306	2.526	2.54	2.275		4.2	4.317	3.858	3.098	3.459	2.988	2.351	1.959	2.175
	4.387	3.561	3.869	3.633	3.345	2.55	2.419	2.353	2.325		3.558	4.297	3.489	2.328	3.398	3.738	2.102	2.222	2.229
	4.187	3.988	4.05	3.65	3.344	2.878	2.693	2.277	2.534		3.766	4.102	3.493	3.046	3.624	3.362	2.191	2.334	2.329
	4.075	3.926	4.513	3.12	3.68	2.707	2.353	2.411	2.021		4.841	3.978	4.163	3.937	3.381	2.782	2.323	2.009	2.301
	3.79	4.356	4.16	3.131	3.27	3.46	2.21	2.27	2.296		4.043	3.557	4.194	3.821	3.709	3.019	2.147	2.188	2.078
	4.043	4.306	4.355	3.62	3.135	3.162	2.422	2.314	1.914		4.362	4.357	4.373	3.412	2.834	2.926	2.313	2.005	2.483
	4.611	4.124	4.028	3.505	3.123	3.461	2.809	2.215	2.281		4.651	4.082	3.998	3.758	3.767	3.191	1.934	2.213	2.24
	4.152	4.171	4.585	3.149	2.909	3.073	2.332	2.185	2.311		3.88	4.255	4.23	3.829	3.356	2.879	2.045	2.301	2.048
	4.081	4.445	4.239	3.709	3.384	3.179	2.335	2.363	2.313		3.833	4.514	4.122	3.043	3.039	3.598	2.217	2.015	2.254
	4.064	4.391	4.376	3.023	3.011	2.976	2.586	1.961	2.915		3.174	4.354	4.216	3.637	2.27	3.274	1.904	2.268	2.441
	4.177	4.013	4.216	3.083	3.165	3.265	2.426	1.855	1.973		4.339	4.001	3.294	3.243	3.044	2.99	2.278	2.019	1.985
	4.212	4.528	4.412	3.442	3.596	3.468	2.567	2.33	2.284		3.619	4.081	3.742	3.53	3.906	3.34	2.208	2.144	2.412
	4.259	3.822	3.623	3.072	2.646	3.108	2.302	1.977	2.379		3.871	4.056	4.048	3.371	3.646	2.453	2.153	2.268	2.281
	4.037	4.181	4.041	3.679	3.272	3.68	2.098	1.911	2.17		4.386	3.949	3.846	3.092	3.38	3.252	2.135	2.168	2.228
	4.349	3.908	4.546	2.707	3.787	3.226	2.063	2.131	2.507		3.632	3.946	4.307	3.119	3.227	2.832	1.9	2.329	2.18
	4.783	4.293	4.382	3.177	3.815	3.057	2.572	2.458	2.829		4.364	4.331		3.796	3.549	3.186	2.077	2.132	2.311
	4.192	3.944	3.987	3.283	3.425	3.791	2.198	2.053	2.32		4.662			2.823	3.471	3.89	2.024		2.292
	4.247	3.786	4.003	3.617	3.287	3.348		2.235	2.107		4.916			3.739	2.899	3.441	2.335		2.287
	3.79	4.146		3.137	3.033	3.579		2.177			4.74			3.845	3.46	3.249	2.169		2.282
	4.386	3.926		3.203	3.156	3.206		2.188			3.997			3.362		3.493	2.11		2.083
	4.721	4.299		3.836	3.648	2.99		1.927			4.549			3.703		3.558	2.295		2.072
	3.759	4.06		3.447	3.428	3.439		2.319			3.75			2.327		3.383	2.229
	3.473	4.127		3.608	3.565	3.731		2.581						2.149		3.308	2.217
		4.041		3.432	3.959	2.578								3.138		2.817	2.132
		3.848		3.711	3.898	2.992								3.1		3.495	2.321
		4.296		3.348	3.53	2.993								3.132		3.052	2.088
				3.26	3.268	3.408										2.736	2.11
				3.744	2.976	2.745										3.782	2.263
				3.28	3.511	3.446										3.031	2.295
				3.636	3.521	3.023										3.121	1.863
				3.037	3.353	3.237										3.463	2.299
				2.642	3.456	3.27										3.463
				3.671	3.167	2.88										3.415
				3.149	3.185	3.059										3.207
				3.419	2.326	2.761										3.638
				3.243	2.578	3.183										3.266
					2.803	3.548										3.413
					3.168	2.736
					3.438	3.219
					3.179	3.411
					3.643	3.486
					3.154	2.832
					2.597	3.621
					2.891
					3.799
					3.449
					3.142
					3.132
					3.09
					3.178
					2.765
Figure 6 - Figure supplement 2c
	NC8	NC8 LTANC8	NC8 LTA∆dltxabcd	∆dltop	∆dltop LTANC8	∆dltop LTA∆dltxabcd	GF	GF LTANC8	GF LTA∆dltxabcd		NC8	NC8 LTANC8	NC8 LTA∆dltxabcd	∆dltop	∆dltop LTANC8	∆dltop LTA∆dltxabcd	GF	GF LTANC8	GF LTA∆dltxabcd
	4.525	4.138	3.844	2.784	4.152	3.363	2.713	2.337	2.246		3.735	4.09	4.128	2.027	4.207	3.671	2.26	1.897	2.184
	4.369	4.491	4.407	3.256	3.702	3.198	2.33	2.553	2.537		3.742	3.651	4.02	2.244	3.321	2.339	2.277	1.668	2.202
	4.32	3.657	4.197	3.248	4.19	3.181	2.313	2.492	2.382		3.998	4.138	4.07	3.514	4.305	2.559	2.212	1.852	2.194
	4.068	3.924	4.311	3.228	3.81	3.052	2.146	2.173	2.268		3.915	4.438	4.244	2.212	4.201	3.539	1.998	1.859	2.444
	3.979	4.318	3.96	2.299	3.555	2.258	2.468	2.87	2.263		4.577	4.42	4.475	2.408	4.126	3.85	2.267	1.807	2.79
	3.69	4.284	4.164	2.612	3.427	3.182	2.412	2.438	2.279		4.402	4.406	3.799	2.254	4.007	2.814	2.444	2.178	2.263
	3.646	3.983	3.852	3.4	4.287	3.325	2.611	2.249	2.358		4.192	3.374	4.148	2.892	4.169	2.95	2.012	1.891	2.205
	3.702	3.706	3.882	2.645	3.832	3.268	1.917	2.168	2.367		3.942	4.407	4.388	3.664	3.032	3.395	2.225	2.055	2.157
	3.97	4.468	4.111	2.645	3.71	2.991	2.201	2.269	2.071		4.117	3.647	4.209	3.243	3.537	2.78	1.992	2.057	2.236
	4.172	4.125	4.18	3.305	3.453	2.843	2.348	2.641	1.963		4.581	3.596	3.805	2.606	3.555	3.693	2.139	1.987	2.118
	3.802	4.052	3.873	3.113	3.298	2.988	2.018	2.431	1.844		4.533	3.999	3.783	2.993	3.582	3.089	2.26	1.993	2.014
	4.18	4.071	3.783	3.155	3.736	3.127	1.972	1.971	2.071		4.037	4.356	4.49	2.968	3.298	2.833	2.241	2.377	2.102
	4.332	4.073	3.702	2.865	3.01	3.426	1.753	2.342	2.098		4.141	3.955	3.889	2.818	3.794	2.638	1.884	1.941	2.422
	3.506	3.692	3.513	3.152	3.396	3.07	2.078	2.017	2.051		4.127	4.395	4.445	2.5	3.7	2.454	2.289	1.918	2.432
	4.307	3.293	3.985	3.265	4.198	3.067	1.931	2.306	1.858		4.474	3.72	4.373	3.799	3.788	2.584	2.278	1.994	2.168
	4.392	4.071	4.091	3.12	4.284	3.673	1.85	2.135	2.016		4.005	3.253	4.407	2.799	3.618	2.513	2.31	1.959	2.288
	4.114	4.82	4.347	3.514	3.44	3.393	1.787	1.906	1.923		4.499	4.215	4.02	2.945	3.221	3.347	2.426	1.912	1.978
	4.123	4.206	4.327	3.204	3.518	3.073	2.293	2.243	2.158		4.009	3.795	4.374	3.831	3.638	3.116	2.479	1.862	2.181
	4.749	3.87	4.069	2.753	3.534	2.97	1.932	2.25	2.435		3.967	4.169	4.521	2.629	4.226	2.891	2.207	1.868	2.264
	3.686	4.528	3.912	2.645	3.243	3.296	2.268	2.057	2.312		4.384	3.784	4.168	2.946	4.021	2.724	2.181	2.099	2.313
	3.215	4.494	4.003	3.197	3.163	3.042	2.226	2.072	1.85		4.558	4.194	4.153	3.252	3.834	3.241	2.554	2.075	2.554
	4.071	4.468	3.721	3.591	3.694	3.282	1.901	1.912	1.99		4.135	3.896	4.277	2.884	3.321	2.029	2.215	2.075	2.68
	4.039	3.568	4.421	2.656	3.861	3.106	1.854	1.965	2.168		4.524	4.288	4.291	3.546	3.79	3.083	2.301	1.844	2.202
	3.329	4.433	4.09	3.413	3.551	3.275	2.061	2.058	2.238		4.446	4.042	3.931	2.776	3.922	3.464	2.289	2.033	2.264
	4.425	4.197	4.222	2.87	3.383	3.303	2.106	1.786	1.944		4.103	3.909	4.471	2.895	4.015	2.063	1.779	2.179	2.616
	4.547	3.797	4.291	3.163	3.552	3.377	1.831	1.971	1.823		3.852	4.313	4.54	2.39	3.148	3.687	2.273	1.982	1.973
	4.49	3.694	4.219	3.433	3.148	2.826	1.998	1.936	1.869		4.047	4.601	3.995	2.116	3.867	3.489	2.3	1.835	2.328
	3.829	4.162	4.092	2.874	3.824	2.713	2.21	2.329	1.889		4.393	4.613	3.946	2.412	4.069	2.485	2.569	2.864	2.468
	4.519	4.26	3.775	3.055	3.752	2.812	2.039	2.143	1.813		3.627	4.058	3.792	3.659	3.439	3.102	2.301	1.95	2.336
	3.181	4.481	3.909	2.739	3.767	3.263	1.897	1.947	2.002		4.231	4.231	4.225	3.427	3.8	2.616	2.287	1.941	2.815
	3.939	3.645	4.088	3.511	3.371	3.579	2.107	2.135	2.028		4.503	4.063	4.749	3.572	3.431	2.852	2.465	2.549	2.147
	4.031	3.667	4.298	2.826	3.683	2.957	2.019	1.829	2.209		4.295	4.249	3.763	2.497	3.407	3.37	2.149	2.493	2.641
	3.877	3.908	4.333	3.23	3.525	3.396	2.293	2.226	2.258		4.117	4.521	4.077	2.013	3.269	3.222	2.151	2.372	2.057
	4.096	4.643	4.106	3.129	3.67	3.363	2.146	1.959	2.305		3.899	4.443	3.834	2.881	3.468	3.484	2.105	2.546	2.264
	4.56	4.608	4.319	3.238	3.428	2.733	2.018	2.03	2.377		4.079	4.368	4.6	3.201	4.441	2.497	2.569	2.362	2.367
	4.29	3.899	4.341	3.027	3.46	3.383	2.164	2	1.714		4.504	4.436	4.124	2.281	3.822	3.335	2.346	2.151	2.225
	4.347	4.312	3.541	2.908	3.508	3.01	2.09	2.058	1.895		4.394	4.462	4.155	3.06	4.216	3.437	2.181	2.548	2.261
	3.854	4.125	3.907	2.988	3.27	3.128	2.194	2.352	2.036		4.162	3.814	4.203	2.969	3.072	3.261	2.35	2.602	2.355
	4.059	4.137	4.111	3.016	3.562	3.375	2.376	2.015	2.037		4.284	4.517	4.213	2.259	4.766	3.399	2.195	2.456	2.468
	3.812	4.574	4.43	3.276	3.034	2.789	2.12	2.121	2.314		4.579	3.966	4.705	3.322	3.402	2.268	2.362	2.755	2.242
	3.641	3.917	4.308	3.13	3.371	3.218	2.132	2.099	2.403		4.116	3.823	4.294	2.499	3.4	2.961	2.352	2.162	2.513
	3.84	4.199	4.471	3.271	3.4	3.446	1.914	2.22	2.099		4.317	4.404	4.254	2.306	3.857	3.387	1.994	2.426	2.21
	3.389	3.384	4.213	3.229	3.358	3.252	1.849	2.25	1.979		4.042	4.224	3.904	2.144	3.584	2.583	2.47	2.16	2.705
	3.673	3.405	4.342	3.083	3.119	3.355	1.972	2.279	2.137		4.594	4.352	3.928	2.12	4.143	2.915	2.252	2.138	1.991
	3.833	4.514	4.613	2.354	2.986	3.221	2.127	1.894	2.073		4.235	4.031	4.548	2.666	3.698	2.512	2.048	2.791	2.028
	3.844	4.26	4.513	3.411	3.973	3.277	2.248	2.138	2.083		4.626	3.979	3.947	3.383	4.322	2.365	2.424	2.028	2.608
	3.811	4.208	4.114	3.104	3.365	3.286	2.042	2.476	2.089		4.652	4.06	3.889	3.065	3.757	3.425	2.252	2.608	2.431
	4.305	4.087	4.114	3.123	3.257	3.332	2.267	2.362	2.099		4.02	4.5	3.769	2.885	3.703	3.428	2.158	2.431	2.243
	3.636	3.966	4.29	2.674	3.641	3.263	1.983	2.242	2.055		3.573	3.695	4.281	2.985	3.727	3.04	2.274	2.243	2.021
	3.976	4.074	4.064	2.938	3.532	3.327	2.449	2.204	2.122		4.051	4.421	4.264	3.49	3.903	3.027	1.976	2.421	2.173
	3.799	4.028	4.34	2.939	3.941	3.154	2.101	1.972	2.313		4.279	3.856	4.228	2.152	3.012	3.185	2.12	2.173	2.243
	3.737	3.592	4.341	3.456	3.809	2.946	2.313	2.244	2.073		4.291	3.943	4.132	2.603	3.672	3.061	2.62	2.243	2.036
	3.789	4.16	4.495	3.275	3.828	3.127	2.048	2.045	2.258		4.057	4.474	3.994	3.575	3.477	2.509	2.289	2.636	2.18
	3.85	4.425	4.414	3.355	3.632	3.205	1.874	2.277	2.171		4.5	3.989	4.5	2.328	3.812	2.995	1.984	2.18	2.188
	4.056	4.112	4.229	3.183	3.832	2.793	2.068	1.894	2.164		4.115	4	4.176	3.626	4.449	1.986	2.352	2.188	2.181
											4.017	4.28	4.144	2.897	4.398	2.264	2.287	2.181	2.288
											3.96	4.11	4.122	3.803	4.493	3.307	2.3	2.288	2.286
											4.339	4.227	4.21	2.825	3.921	3.77	2.158	2.286	2.37
											4.383	4.072	4.155	2.928	3.972	3.699	2.281	2.37	1.914
											4.39	4.119	4.102	2.186	3.879	2.837	2.269	1.914
												4.026	4.268	2.597	2.979	2.398	2.201
												3.863	4.567	3.334	3.817	2.335	2.2
												4.568	4.52	3.047		2.605	2.024
												4.257	4.05	3.641		3.477	2.341
												4.429	4.171	2.15			2.294
												4.022	4.708	2.894			2.395
												4.349		2.704			2.265
												4.421		2.557			2.012
												4.506					2.272
												4.62					2.238
												4.053
												4.457
												3.696
												4.229
												4.444
Figure 6 - Figure supplement 2d
	NC8	NC8 LTANC8	NC8 LTA∆dltxabcd	∆dltop	∆dltop LTANC8	∆dltop LTA∆dltxabcd	∆ltaS	∆ltaS LTANC8	∆ltaS LTA∆dltxabcd	GF	GF LTANC8	GF LTA∆dltxabcd
	3.953	3.532	3.104	3.019	4.163	3.011	2.154	4.158	3.081	2.163	2.476	2.455
	3.881	4.019	3.606	3.221	3.382	2.802	2.4	3.278	2.296	2.136	2.093	2.405
	4.368	3.589	3.906	3.326	3.923	2.267	3.06	3.463	2.442	2.135	1.98	2.157
	4.223	3.581	4.1	2.246	4.079	3.492	2.87	3.689	2.178	2.285	2.116	2.409
	4.599	3.941	3.757	2.166	3.891	2.223	2.904	4.219	3.342	2.126	2.026	2.057
	3.939	3.742	3.537	2.045	3.318	2.336	2.768	4.36	2.344	2.255	1.967	2.258
	3.445	4.398	3.446	2.498	4.087	3.317	2.725	4.348	2.249	2.072	2.22	2.271
	3.906	4.03	4.31	2.748	3.738	3.481	2.685	3.431	2.857	2.061	2.079	2.147
	4.24	4.173	4.141	3.266	3.899	2.62	2.606	3.443	2.069	2.272	2.094	2.244
	4.372	4.846	4.533	2.68	4.466	2.911	3.209	4.018	2.763	2.079	2.057	2.101
	3.777	3.937	3.912	2.431	3.583	3.118	3.006	3.574	3.535	2.308	1.984	2.34
	4.15	4.422	4.36	2.691	4.081	3.503	3.063	3.318	2.978	2.274	2.054	2.352
	4.273	4.151	3.959	2.813	4.135	3.128	3.074	4.023	3.162	2.193	2.85	2.257
	3.99	3.937	4.245	2.414	4.066	2.289	2.37	4.126	2.411	2.268	2.336	2.248
	4.001	4.097	3.71	2.396	4.094	2.329	3.125	3.587	2.229	2.215	2.083	2.292
	3.743	3.955	3.452	2.039	3.45	2.535	2.455	4.123	2.633	2.245	1.96	1.59
	3.347	4.079	3.551	2.325	3.754	2.225	3.062	3.918	2.706	2.102	1.895	2.312
	3.89	3.73	4.431	3.259	3.551	3.124	2.36	3.977	2.755	2.229	2.099	2.137
	3.916	4.029	3.485	3.23	4.183	2.533	3.186	4.224	2.87	2.252	1.891	2.178
	3.864	3.621	4.047	2.617	4.254	3.16	3.095	3.943	2.642	2.283	2.189	2.348
	3.667	3.725	3.996	2.549	3.373	3.173	2.896	4.225	2.413	2.003	1.901	2.195
	4.432	3.623	3.79	2.6	3.297	3.001	3.04	3.632	2.186	2.016	2.668	2.224
	4.06	4.163	3.836	3.115	3.557	3.231	2.748	4.222	3.232	2.301	2.313	2.188
	3.899	3.713	3.913	2.942	4.002	2.666	2.639	4.286	3.294	2.521	2.652	2.448
	3.836	4.476	3.345	2.301	4.062	3.821	2.17	4.369	3.123	2.211	2.652	2.266
	3.23	4.225	4.206	2.328	4.074	2.486	3.213	3.979	3.058	2.197	1.989	2.481
	3.848	3.719	3.993	2.41	3.363	2.347	2.529	3.997	2.956	2.136	2.722	2.255
	4.401	3.759	3.985	2.918	3.937	3.29	2.994	4.376	2.726	1.993	1.991	2.174
	3.885	3.866	3.797	2.797	3.793	2.314	2.601	3.449	2.124	2.546	1.786	2.503
	3.799	4.047	3.326	2.779	3.451	3.081	2.602	4.159	2.367	2.163	2.128	2.202
	4.083	4.534	3.3	2.43	3.816	2.224	2.307	3.413	2.93	2.043	1.865	2.124
	4.114	4.35	3.782	3.076	3.924	3.413	2.065	3.61	2.086	2.257	1.953	2.404
	3.71	3.934	3.882	2.965	3.347	3.302	2.918	4.289	2.425	2.033	2.351	2.107
	3.8	4.52	4.512	3.208	3.307	1.892	2.758	3.734	3.046	2.214	1.95	2.354
	3.434	4.527	4.9	2.89	3.732	1.979	2.537	3.31	2.874	2.177	2.178	2.202
	3.296	3.736	4.18	2.636	4.193	2.929	2.16	3.732	2.921	2.137	1.853	2.303
	4.041	3.744	4.286	3.021	3.688	3.782	2.716	3.888	2.293	2.161	2.003	2.212
	3.299	4.519	3.731	3.359	4.063	2.937	2.842	3.997	2.092	2.351	2.26	2.184
	4.111	4.243	4.308	2.777	3.837	3.726	2.845	4.227	3.099	2.102	2.143	2.378
	3.786	3.788	4.415	3.494	3.806	3.923	2.635	4.322	2.907	2.191	2.105	2.06
	3.579	3.942	3.763	2.915	3.556	2.995	2.635	4.369	2.689	2.323	1.971	2.144
	4.022	3.849	3.907	2.456	3.811	2.592	2.592	4.191	2.04	2.147	2.018	2.145
	4.027	4.452	4.178	2.619	3.778	3.42	2.514	3.987	2.286	2.313		1.972
	3.423	3.916	4.136	2.864	3.764	3.573	2.578	3.47	2.172	1.934		2.329
	4.435	3.912	3.863	3.215	3.716	3.314	2.122	4.138	2.99	2.045		2.418
	4.323	4.254	4.454	3.217	3.901	2.767	2.848	3.583	2.51	2.217		2.46
	3.944	3.827	3.57	3.008	3.581	2.736	3.172	3.649	2.527	1.904		2.289
	4.189	3.701	3.831	2.847	4.167	2.844	3.261	4.365	2.096	2.278		1.452
	3.748	4.16	4.093	3.102		2.619	2.894	4.215	2.536	2.208		2.15
	4.69	3.914	4.361	2.427		3.054	3.083	3.462	2.356	2.153
	3.756	4.063	4.141	2.658		2.747	2.222	4.155	3.231	2.135
	4.586	4.269	3.869	2.505		2.898	3.144	3.323	2.575	1.9
	3.839	4.433	4.507	2.535		3.109	2.352	3.658		2.077
	4.079	4.141	4.271	3.13		2.801	2.408	4.386		2.024
	4.618	3.744	3.426	3.157		2.611	2.398	4.037		2.335
	4.2	3.584	4.27	2.963		3.074	3.051	4.198		2.169
	4.435	4.073	3.863			3.115	2.797	3.744		2.11
	4.323	3.936	4.014			2.894	3.062	3.813		2.295
	3.944	3.947	4.17			3.223	2.287	3.776		2.229
	4.189	3.696	4.253			2.098	2.68	3.416		2.217
	3.748	3.965	3.527			3.241	2.932			2.132
	4.69	3.701	3.801			1.894	2.932			2.321
	3.756	3.494				2.119	2.434			2.088
	4.586	3.875				2.783	2.648			2.11
	3.839	3.634				2.568	2.666			2.263
	4.079					3.753				2.295
	4.618					3.255				1.863
	4.2					3.716				2.299
