# Supplementary material for: Structure–function analysis of Lactiplantibacillus plantarum DltE reveals D-alanylated lipoteichoic acids as direct cues supporting Drosophila juvenile growth
Source: eLife. 2023 Apr 12;12:e84669. doi: 10.7554/eLife.84669 (PMC10241514; doi:10.7554/eLife.84669)
Supplement: Figure 6—source data 3. [file elife-84669-fig6-data3.xlsx]

## Sheet: Figure 6
Figure 6 - Figure supplement 2a
	dredd NC8	dredd ΔltaS	dredd ∆ltaS LTANC8	dredd ∆ltaS LTA∆dltxabcd	dredd GF		dredd NC8	dredd ΔltaS	dredd ∆ltaS LTANC8	dredd ∆ltaS LTA∆dltxabcd	dredd GF
	0.3087	0.1497	0.1909	0.1588	0.07041		0.2719	0.13139	0.2158	0.1023	0.0691
	0.212	0.1282	0.2013	0.1416	0.09013		0.37816	0.1733	0.2024	0.1573	0.084
	0.3389	0.1459	0.2123	0.1254	0.0734		0.2226	0.1519	0.182	0.1091	0.09714
	0.2792	0.1086	0.2114	0.1064	0.0923		0.334	0.14727	0.1952	0.1512	0.08522
	0.2136	0.1158	0.1866	0.1422	0.0783		0.3289	0.1363	0.183	0.1598	0.06838
Figure 6 - Figure supplement 2b
	dredd NC8	dredd ΔltaS	dredd ∆ltaS LTANC8	dredd ∆ltaS LTA∆dltxabcd	dredd GF		dredd NC8	dredd ΔltaS	dredd ∆ltaS LTANC8	dredd ∆ltaS LTA∆dltxabcd	dredd GF
	3.8397	1.8607	3.0852	1.4279	1.2128		4.25	1.4498	3.7263	2.2495	1.8956
	4.6203	2.0652	3.6172	1.9356	1.5706		4.4783	1.6196	3.0671	1.5355	1.698
	3.7774	1.9921	2.7422	2.538	1.7115		3.4359	2.3963	3.2305	2.4886	1.9637
	4.2409	2.4158	3.4667	2.1466	1.395		4.0924	1.7846	3.4853	2.0915	1.8901
	3.8656	2.052	2.5496	1.8557	2.1358		4.1702	1.8715	3.6267	2.7881	2.2033
