# Supplementary material for: Structure–function analysis of Lactiplantibacillus plantarum DltE reveals D-alanylated lipoteichoic acids as direct cues supporting Drosophila juvenile growth
Source: eLife journal article supplement (doi:10.7554/elife.84669), 2023-04-12
Supplement: supp [file elife-84669-supp-v1.zip]

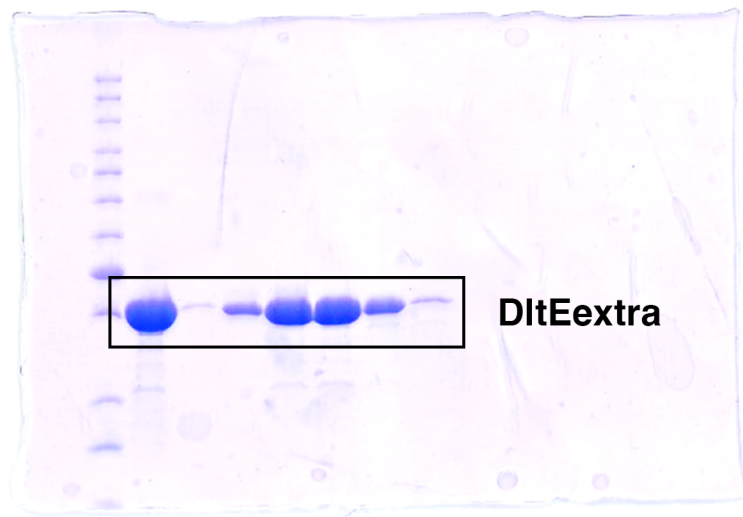

**DltEextra**
