# Supplementary figures and images for: Structure–function analysis of Lactiplantibacillus plantarum DltE reveals D-alanylated lipoteichoic acids as direct cues supporting Drosophila juvenile growth
Source: eLife journal article supplement (doi:10.7554/elife.84669), 2023-04-12

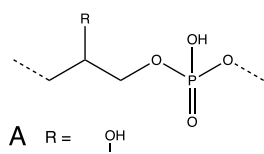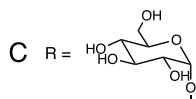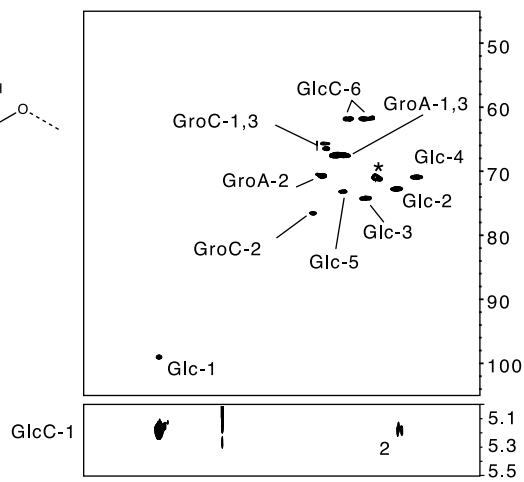

Supplement: supp [file elife-84669-supp-v1.zip]

**A**

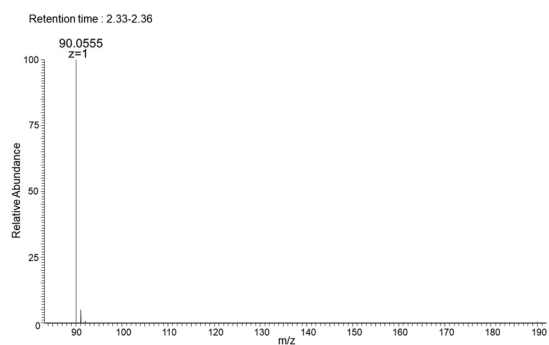

**B**

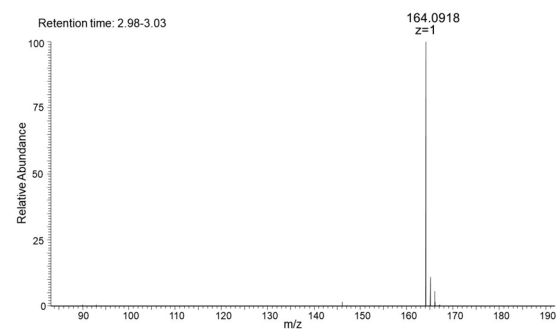

**C**

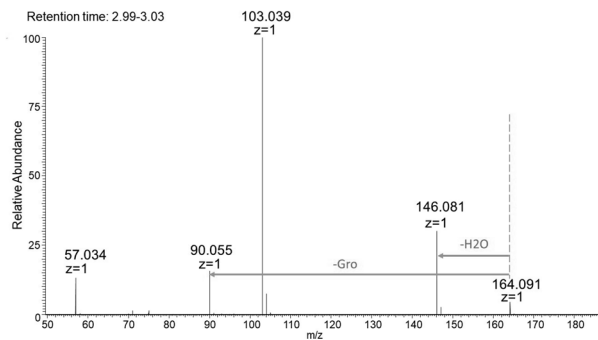

**D**

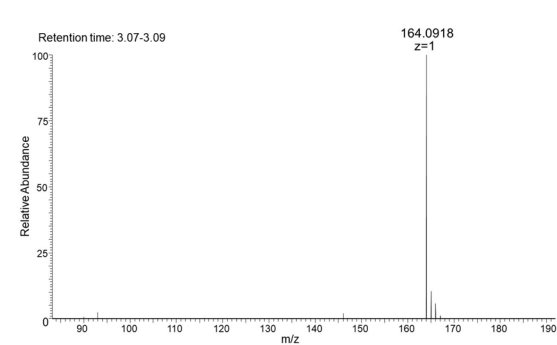

**E**

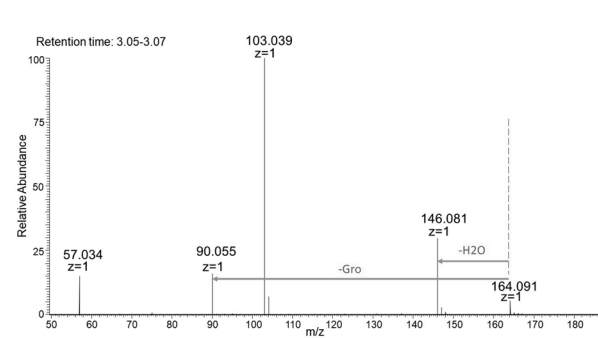

Supplement: supp [file elife-84669-supp-v1.zip]

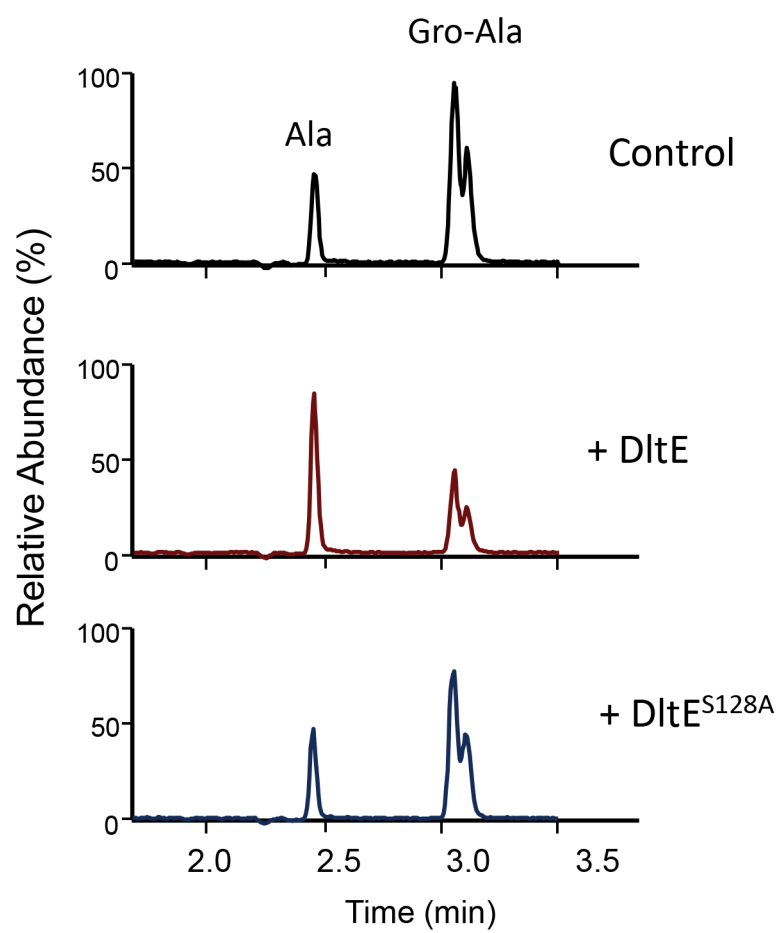

Supplement: supp [file elife-84669-supp-v1.zip]

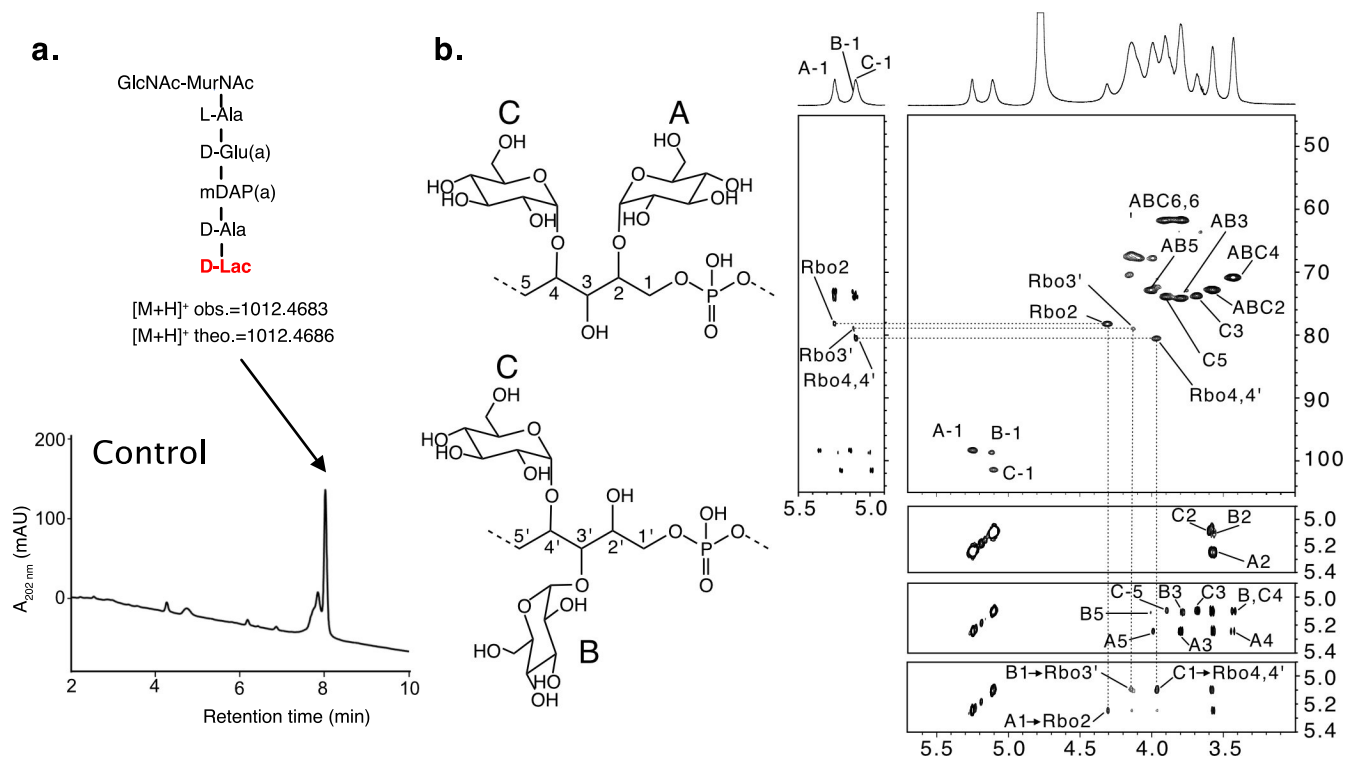

Supplement: supp [file elife-84669-supp-v1.zip]
